# Supplementary material for: A network model of genomic hormone interactions underlying dementia and its translational validation through serendipitous off-target effect
Source: J Transl Med. 2013 Jul 26;11:177. doi: 10.1186/1479-5876-11-177 (PMC3733613; doi:10.1186/1479-5876-11-177)
Supplement: Additional file 2 — Analysis of dementia-related proteins for GO biological processes enrichment. Results of GSEA GO (Biological Process) analysis again point to subtle hormone-dependent biological processes. Description: Result table of GSEA GO biological process analysis on the list of literature-derived genes/proteins. [file 1479-5876-11-177-S2.xls]

## Sheet: GSEA_BiologicalProcess_Dementia
Overlap Results
Collection(s):	BP
# overlaps shown:	50
# genesets in collections:	825
# genes in comparison (n):	1856
# genes in collections (N):	6032
Gene Set Name	# Genes in Gene Set (K)	Description	# Genes in Overlap (k)	k/K	p value
CHEMICAL_HOMEOSTASIS	150	Genes annotated by the GO term GO:0048878. The biological processes involved in the maintenance of an internal equilibrium of a chemical.	73	0.4867	2.61e-06
BEHAVIOR	149	Genes annotated by the GO term GO:0007610. The specific actions or reactions of an organism in response to external or internal stimuli. Patterned activity of a whole organism in a manner dependent upon some combination of that organism's internal state and external conditions.	72	0.4832	4.23e-06
REGULATION_OF_BIOLOGICAL_QUALITY	405	Genes annotated by the GO term GO:0065008. Any process that modulates the frequency, rate or extent of a biological quality. A biological quality is a measurable attribute of an organism or part of an organism, such as size, mass, shape, color, etc.	164	0.4049	1.1e-05
NEGATIVE_REGULATION_OF_APOPTOSIS	147	Genes annotated by the GO term GO:0043066. Any process that stops, prevents or reduces the frequency, rate or extent of cell death by apoptosis.	69	0.4694	2.3e-05
NEGATIVE_REGULATION_OF_DEVELOPMENTAL_PROCESS	193	Genes annotated by the GO term GO:0051093. Any process that stops, prevents or reduces the rate or extent of development, the biological process whose specific outcome is the progression of an organism over time from an initial condition (e.g. a zygote, or a young adult) to a later condition (e.g. a multicellular animal or an aged adult).	86	0.4456	2.88e-05
RESPONSE_TO_WOUNDING	185	Genes annotated by the GO term GO:0009611. A change in state or activity of a cell or an organism (in terms of movement, secretion, enzyme production, gene expression, etc.) as a result of a stimulus indicating damage to the organism.	83	0.4486	2.92e-05
NEGATIVE_REGULATION_OF_PROGRAMMED_CELL_DEATH	148	Genes annotated by the GO term GO:0043069. Any process that stops, prevents or reduces the frequency, rate or extent of programmed cell death, cell death resulting from activation of endogenous cellular processes.	69	0.4662	3.03e-05
RESPONSE_TO_EXTERNAL_STIMULUS	306	Genes annotated by the GO term GO:0009605. A change in state or activity of a cell or an organism (in terms of movement, secretion, enzyme production, gene expression, etc.) as a result of an external stimulus.	126	0.4118	4.88e-05
HOMEOSTATIC_PROCESS	201	Genes annotated by the GO term GO:0042592. The biological processes involved in the maintenance of an internal equilibrium.	88	0.4378	5.22e-05
ION_HOMEOSTASIS	124	Genes annotated by the GO term GO:0050801. Any of the processes involved in the maintenance of an internal equilibrium of ions within an organism or cell.	59	0.4758	5.46e-05
CELLULAR_CATION_HOMEOSTASIS	101	Genes annotated by the GO term GO:0030003. The regulation of the levels, transport, and metabolism of cations within a cell or between a cell and its external environment.	50	0.495	5.57e-05
CATION_HOMEOSTASIS	104	Genes annotated by the GO term GO:0055080. The regulation of the levels, transport, and metabolism of cations.	51	0.4904	6.47e-05
REGULATION_OF_RESPONSE_TO_EXTERNAL_STIMULUS	15	Genes annotated by the GO term GO:0032101. Any process that modulates the frequency, rate or extent of a response to an external stimulus.	12	0.8	0.000118
LOCOMOTORY_BEHAVIOR	91	Genes annotated by the GO term GO:0007626. The specific movement from place to place of an organism in response to external or internal stimuli. Locomotion of a whole organism in a manner dependent upon some combination of that organism's internal state and external conditions.	45	0.4945	0.000134
G_PROTEIN_SIGNALING_COUPLED_TO_CYCLIC_NUCLEOTIDE_SECOND_MESSENGER	98	Genes annotated by the GO term GO:0007187. The series of molecular signals generated as a consequence of a G-protein coupled receptor binding to its physiological ligand, followed by modulation of a nucleotide cyclase activity and a subsequent change in the concentration of a cyclic nucleotide.	47	0.4796	0.000242
ANTI_APOPTOSIS	115	Genes annotated by the GO term GO:0006916. A process which directly inhibits any of the steps required for cell death by apoptosis.	53	0.4609	0.000353
REGULATION_OF_APOPTOSIS	336	Genes annotated by the GO term GO:0042981. Any process that modulates the occurrence or rate of cell death by apoptosis.	132	0.3929	0.000393
CYCLIC_NUCLEOTIDE_MEDIATED_SIGNALING	100	Genes annotated by the GO term GO:0019935. A series of molecular signals in which a cell uses a cyclic nucleotide to convert an extracellular signal into a response.	47	0.47	0.000434
REGULATION_OF_PROGRAMMED_CELL_DEATH	337	Genes annotated by the GO term GO:0043067. Any process that modulates the frequency, rate or extent of programmed cell death, cell death resulting from activation of endogenous cellular processes.	132	0.3917	0.000455
CELLULAR_HOMEOSTASIS	141	Genes annotated by the GO term GO:0019725. The processes involved in the maintenance of an internal equilibrium at the level of the cell.	62	0.4397	0.000565
APOPTOSIS_GO	424	Genes annotated by the GO term GO:0006915. A form of programmed cell death induced by external or internal signals that trigger the activity of proteolytic caspases, whose actions dismantle the cell and result in cell death. Apoptosis begins internally with condensation and subsequent fragmentation of the cell nucleus (blebbing) while the plasma membrane remains intact. Other characteristics of a…	161	0.3797	0.000625
PROGRAMMED_CELL_DEATH	425	Genes annotated by the GO term GO:0012501. Cell death resulting from activation of endogenous cellular processes.	161	0.3788	0.000708
INFLAMMATORY_RESPONSE	124	Genes annotated by the GO term GO:0006954. The immediate defensive reaction (by vertebrate tissue) to infection or injury caused by chemical or physical agents. The process is characterized by local vasodilation, extravasation of plasma into intercellular spaces and accumulation of white blood cells and macrophages.	55	0.4435	0.000882
RESPONSE_TO_HYPOXIA	28	Genes annotated by the GO term GO:0001666. A change in state or activity of a cell or an organism (in terms of movement, secretion, enzyme production, gene expression, etc.) as a result of a stimulus indicating lowered oxygen tension.	17	0.6071	0.000982
AMYLOID_PRECURSOR_PROTEIN_METABOLIC_PROCESS	10	Genes annotated by the GO term GO:0042982. The chemical reactions and pathways involving amyloid precursor protein (APP), the precursor of beta-amyloid, a glycoprotein associated with Alzheimer's disease.	8	0.8	0.0019
REGULATION_OF_NEURON_APOPTOSIS	12	Genes annotated by the GO term GO:0043523. Any process that modulates the occurrence or rate of cell death by apoptosis in neurons.	9	0.75	0.00205
G_PROTEIN_SIGNALING_COUPLED_TO_CAMP_NUCLEOTIDE_SECOND_MESSENGER	64	Genes annotated by the GO term GO:0007188. The series of molecular signals generated as a consequence of a G-protein coupled receptor binding to its physiological ligand, followed by modulation of adenylyl cyclase activity and a subsequent change in the concentration of cyclic AMP.	31	0.4844	0.00219
TRANSMISSION_OF_NERVE_IMPULSE	187	Genes annotated by the GO term GO:0019226. The sequential electrochemical polarization and depolarization that travels across the membrane of a nerve cell (neuron) in response to stimulation.	76	0.4064	0.00231
G_PROTEIN_SIGNALING_ADENYLATE_CYCLASE_ACTIVATING_PATHWAY	25	Genes annotated by the GO term GO:0007189. The series of molecular signals generated as a consequence of a G-protein coupled receptor binding to its physiological ligand, followed by activation of adenylyl cyclase and a subsequent increase in the concentration of cyclic AMP.	15	0.6	0.00231
CAMP_MEDIATED_SIGNALING	65	Genes annotated by the GO term GO:0019933. A series of molecular signals in which a cell uses cyclic AMP to convert an extracellular signal into a response.	31	0.4769	0.00297
SYNAPTIC_TRANSMISSION	172	Genes annotated by the GO term GO:0007268. The process of communication from a neuron to a target (neuron, muscle, or secretory cell) across a synapse.	70	0.407	0.00324
CELLULAR_RESPONSE_TO_STIMULUS	19	Genes annotated by the GO term GO:0051716. A change in state or activity of a cell (in terms of movement, secretion, enzyme production, gene expression, etc.) as a result of a stimulus.	12	0.6316	0.00353
NEURON_APOPTOSIS	17	Genes annotated by the GO term GO:0051402. The process of apoptosis in neurons, the basic cellular unit of nervous tissue. Each neuron consists of a body, an axon, and dendrites. Their purpose is to receive, conduct, and transmit impulses in the nervous system.	11	0.6471	0.00399
POSITIVE_REGULATION_OF_CATALYTIC_ACTIVITY	157	Genes annotated by the GO term GO:0043085. Any process that activates or increases the activity of an enzyme.	64	0.4076	0.00454
REGULATION_OF_NEUROTRANSMITTER_LEVELS	24	Genes annotated by the GO term GO:0001505. Any process that modulates levels of neurotransmitter.	14	0.5833	0.00462
SECOND_MESSENGER_MEDIATED_SIGNALING	146	Genes annotated by the GO term GO:0019932. A series of molecular signals in which an ion or small molecule is formed or released into the cytosol, thereby helping relay the signal within the cell.	60	0.411	0.00477
NEGATIVE_REGULATION_OF_RESPONSE_TO_STIMULUS	11	Genes annotated by the GO term GO:0048585. Any process that stops, prevents or reduces the frequency, rate or extent of a response to a stimulus. Response to stimulus is a change in state or activity of a cell or an organism (in terms of movement, secretion, enzyme production, gene expression, etc.) as a result of a stimulus.	8	0.7273	0.00507
REGULATION_OF_BLOOD_PRESSURE	22	Genes annotated by the GO term GO:0008217. The process that modulates the force with which blood travels through the circulatory system. The process is controlled by a balance of processes that increase pressure and decrease pressure.	13	0.5909	0.00543
CELL_CELL_SIGNALING	400	Genes annotated by the GO term GO:0007267. Any process that mediates the transfer of information from one cell to another.	146	0.365	0.00649
HEMOSTASIS	48	Genes annotated by the GO term GO:0007599. The stopping of bleeding (loss of body fluid) or the arrest of the circulation to an organ or part.	23	0.4792	0.0092
BLOOD_COAGULATION	43	Genes annotated by the GO term GO:0007596. The sequential process by which the multiple coagulation factors of the blood interact, ultimately resulting in the formation of an insoluble fibrin clot; it may be divided into three stages: stage 1, the formation of intrinsic and extrinsic prothrombin converting principle; stage 2, the formation of thrombin; stage 3, the formation of stable fibrin poly…	21	0.4884	0.00967
LIPID_TRANSPORT	28	Genes annotated by the GO term GO:0006869. The directed movement of lipids into, out of, within or between cells. Lipids are compounds soluble in an organic solvent but not, or sparingly, in an aqueous solvent.	15	0.5357	0.00983
CIRCADIAN_RHYTHM	14	Genes annotated by the GO term GO:0007623. The biological processes in an organism that recur with a regularity of approximately 24 hours.	9	0.6429	0.00986
LEARNING_AND_OR_MEMORY	14	Genes annotated by the GO term GO:0007611. The acquisition and processing of information and/or the storage and retrieval of this information over time.	9	0.6429	0.00986
LEUKOCYTE_MIGRATION	14	Genes annotated by the GO term GO:0050900. The movement of leukocytes within or between different tissues and organs of the body.	9	0.6429	0.00986
GLYCOPROTEIN_CATABOLIC_PROCESS	12	Genes annotated by the GO term GO:0006516. The chemical reactions and pathways resulting in the breakdown of glycoproteins, any protein that contains covalently bound glycose (i.e. monosaccharide) residues other than as a moiety of nucleic acid; the glycose occurs most commonly as oligosaccharide or fairly small polysaccharide but occasionally as monosaccharide.	8	0.6667	0.0111
LEUKOCYTE_CHEMOTAXIS	12	Genes annotated by the GO term GO:0030595. The movement of a leukocyte in response to an external stimulus.	8	0.6667	0.0111
WOUND_HEALING	54	Genes annotated by the GO term GO:0042060. The series of events that restore integrity to a damaged tissue, following an injury.	25	0.463	0.0115
CELLULAR_RESPONSE_TO_STRESS	10	Genes annotated by the GO term GO:0033554. A change in state or activity of a cell (in terms of movement, secretion, enzyme production, gene expression, etc.) as a result of a stimulus indicating the organism is under stress. The stress is usually, but not necessarily, exogenous (e.g. temperature, humidity, ionizing radiation).	7	0.7	0.0122
REGULATION_OF_BODY_FLUID_LEVELS	57	Genes annotated by the GO term GO:0050878. Any process that modulates the levels of body fluids.	26	0.4561	0.0126
Gene/Gene Set Overlap Matrix
Gene Symbol	Description	CHEMICAL_HOMEOSTASIS	BEHAVIOR	REGULATION_OF_BIOLOGICAL_QUALITY	NEGATIVE_REGULATION_OF_APOPTOSIS	NEGATIVE_REGULATION_OF_DEVELOPMENTAL_PROCESS	RESPONSE_TO_WOUNDING	NEGATIVE_REGULATION_OF_PROGRAMMED_CELL_DEATH	RESPONSE_TO_EXTERNAL_STIMULUS	HOMEOSTATIC_PROCESS	ION_HOMEOSTASIS	CELLULAR_CATION_HOMEOSTASIS	CATION_HOMEOSTASIS	REGULATION_OF_RESPONSE_TO_EXTERNAL_STIMULUS	LOCOMOTORY_BEHAVIOR	G_PROTEIN_SIGNALING_COUPLED_TO_CYCLIC_NUCLEOTIDE_SECOND_MESSENGER	ANTI_APOPTOSIS	REGULATION_OF_APOPTOSIS	CYCLIC_NUCLEOTIDE_MEDIATED_SIGNALING	REGULATION_OF_PROGRAMMED_CELL_DEATH	CELLULAR_HOMEOSTASIS	APOPTOSIS_GO	PROGRAMMED_CELL_DEATH	INFLAMMATORY_RESPONSE	RESPONSE_TO_HYPOXIA	AMYLOID_PRECURSOR_PROTEIN_METABOLIC_PROCESS	REGULATION_OF_NEURON_APOPTOSIS	G_PROTEIN_SIGNALING_COUPLED_TO_CAMP_NUCLEOTIDE_SECOND_MESSENGER	TRANSMISSION_OF_NERVE_IMPULSE	G_PROTEIN_SIGNALING_ADENYLATE_CYCLASE_ACTIVATING_PATHWAY	CAMP_MEDIATED_SIGNALING	SYNAPTIC_TRANSMISSION	CELLULAR_RESPONSE_TO_STIMULUS	NEURON_APOPTOSIS	POSITIVE_REGULATION_OF_CATALYTIC_ACTIVITY	REGULATION_OF_NEUROTRANSMITTER_LEVELS	SECOND_MESSENGER_MEDIATED_SIGNALING	NEGATIVE_REGULATION_OF_RESPONSE_TO_STIMULUS	REGULATION_OF_BLOOD_PRESSURE	CELL_CELL_SIGNALING	HEMOSTASIS	BLOOD_COAGULATION	LIPID_TRANSPORT	CIRCADIAN_RHYTHM	LEARNING_AND_OR_MEMORY	LEUKOCYTE_MIGRATION	GLYCOPROTEIN_CATABOLIC_PROCESS	LEUKOCYTE_CHEMOTAXIS	WOUND_HEALING
GHRL	ghrelin/obestatin preprohormone	CHEMICAL_HOMEOSTASIS	BEHAVIOR	REGULATION_OF_BIOLOGICAL_QUALITY	NEGATIVE_REGULATION_OF_APOPTOSIS	NEGATIVE_REGULATION_OF_DEVELOPMENTAL_PROCESS	RESPONSE_TO_WOUNDING	NEGATIVE_REGULATION_OF_PROGRAMMED_CELL_DEATH	RESPONSE_TO_EXTERNAL_STIMULUS	HOMEOSTATIC_PROCESS	ION_HOMEOSTASIS	CELLULAR_CATION_HOMEOSTASIS	CATION_HOMEOSTASIS	REGULATION_OF_RESPONSE_TO_EXTERNAL_STIMULUS				REGULATION_OF_APOPTOSIS		REGULATION_OF_PROGRAMMED_CELL_DEATH	CELLULAR_HOMEOSTASIS	APOPTOSIS_GO	PROGRAMMED_CELL_DEATH	INFLAMMATORY_RESPONSE					TRANSMISSION_OF_NERVE_IMPULSE			SYNAPTIC_TRANSMISSION			POSITIVE_REGULATION_OF_CATALYTIC_ACTIVITY			NEGATIVE_REGULATION_OF_RESPONSE_TO_STIMULUS		CELL_CELL_SIGNALING
SOD1	superoxide dismutase 1, soluble (amyotrophic lateral sclerosis 1 (adult))	CHEMICAL_HOMEOSTASIS	BEHAVIOR	REGULATION_OF_BIOLOGICAL_QUALITY	NEGATIVE_REGULATION_OF_APOPTOSIS	NEGATIVE_REGULATION_OF_DEVELOPMENTAL_PROCESS	RESPONSE_TO_WOUNDING	NEGATIVE_REGULATION_OF_PROGRAMMED_CELL_DEATH	RESPONSE_TO_EXTERNAL_STIMULUS	HOMEOSTATIC_PROCESS	ION_HOMEOSTASIS	CELLULAR_CATION_HOMEOSTASIS	CATION_HOMEOSTASIS		LOCOMOTORY_BEHAVIOR			REGULATION_OF_APOPTOSIS		REGULATION_OF_PROGRAMMED_CELL_DEATH	CELLULAR_HOMEOSTASIS	APOPTOSIS_GO	PROGRAMMED_CELL_DEATH				REGULATION_OF_NEURON_APOPTOSIS		TRANSMISSION_OF_NERVE_IMPULSE					NEURON_APOPTOSIS	POSITIVE_REGULATION_OF_CATALYTIC_ACTIVITY				REGULATION_OF_BLOOD_PRESSURE	CELL_CELL_SIGNALING
CCL2	chemokine (C-C motif) ligand 2	CHEMICAL_HOMEOSTASIS	BEHAVIOR	REGULATION_OF_BIOLOGICAL_QUALITY	NEGATIVE_REGULATION_OF_APOPTOSIS	NEGATIVE_REGULATION_OF_DEVELOPMENTAL_PROCESS		NEGATIVE_REGULATION_OF_PROGRAMMED_CELL_DEATH	RESPONSE_TO_EXTERNAL_STIMULUS	HOMEOSTATIC_PROCESS	ION_HOMEOSTASIS	CELLULAR_CATION_HOMEOSTASIS	CATION_HOMEOSTASIS		LOCOMOTORY_BEHAVIOR	G_PROTEIN_SIGNALING_COUPLED_TO_CYCLIC_NUCLEOTIDE_SECOND_MESSENGER	ANTI_APOPTOSIS	REGULATION_OF_APOPTOSIS	CYCLIC_NUCLEOTIDE_MEDIATED_SIGNALING	REGULATION_OF_PROGRAMMED_CELL_DEATH	CELLULAR_HOMEOSTASIS	APOPTOSIS_GO	PROGRAMMED_CELL_DEATH														SECOND_MESSENGER_MEDIATED_SIGNALING
CARTPT	CART prepropeptide	CHEMICAL_HOMEOSTASIS	BEHAVIOR	REGULATION_OF_BIOLOGICAL_QUALITY		NEGATIVE_REGULATION_OF_DEVELOPMENTAL_PROCESS			RESPONSE_TO_EXTERNAL_STIMULUS	HOMEOSTATIC_PROCESS				REGULATION_OF_RESPONSE_TO_EXTERNAL_STIMULUS							CELLULAR_HOMEOSTASIS								TRANSMISSION_OF_NERVE_IMPULSE			SYNAPTIC_TRANSMISSION	CELLULAR_RESPONSE_TO_STIMULUS		POSITIVE_REGULATION_OF_CATALYTIC_ACTIVITY	REGULATION_OF_NEUROTRANSMITTER_LEVELS		NEGATIVE_REGULATION_OF_RESPONSE_TO_STIMULUS	REGULATION_OF_BLOOD_PRESSURE	CELL_CELL_SIGNALING				CIRCADIAN_RHYTHM
CCR2	chemokine (C-C motif) receptor 2	CHEMICAL_HOMEOSTASIS	BEHAVIOR	REGULATION_OF_BIOLOGICAL_QUALITY			RESPONSE_TO_WOUNDING		RESPONSE_TO_EXTERNAL_STIMULUS	HOMEOSTATIC_PROCESS	ION_HOMEOSTASIS	CELLULAR_CATION_HOMEOSTASIS	CATION_HOMEOSTASIS		LOCOMOTORY_BEHAVIOR	G_PROTEIN_SIGNALING_COUPLED_TO_CYCLIC_NUCLEOTIDE_SECOND_MESSENGER			CYCLIC_NUCLEOTIDE_MEDIATED_SIGNALING		CELLULAR_HOMEOSTASIS			INFLAMMATORY_RESPONSE				G_PROTEIN_SIGNALING_COUPLED_TO_CAMP_NUCLEOTIDE_SECOND_MESSENGER			CAMP_MEDIATED_SIGNALING						SECOND_MESSENGER_MEDIATED_SIGNALING
CCR3	chemokine (C-C motif) receptor 3	CHEMICAL_HOMEOSTASIS	BEHAVIOR	REGULATION_OF_BIOLOGICAL_QUALITY			RESPONSE_TO_WOUNDING		RESPONSE_TO_EXTERNAL_STIMULUS	HOMEOSTATIC_PROCESS	ION_HOMEOSTASIS	CELLULAR_CATION_HOMEOSTASIS	CATION_HOMEOSTASIS		LOCOMOTORY_BEHAVIOR	G_PROTEIN_SIGNALING_COUPLED_TO_CYCLIC_NUCLEOTIDE_SECOND_MESSENGER			CYCLIC_NUCLEOTIDE_MEDIATED_SIGNALING		CELLULAR_HOMEOSTASIS			INFLAMMATORY_RESPONSE				G_PROTEIN_SIGNALING_COUPLED_TO_CAMP_NUCLEOTIDE_SECOND_MESSENGER			CAMP_MEDIATED_SIGNALING						SECOND_MESSENGER_MEDIATED_SIGNALING
CXCR4	chemokine (C-X-C motif) receptor 4	CHEMICAL_HOMEOSTASIS	BEHAVIOR	REGULATION_OF_BIOLOGICAL_QUALITY			RESPONSE_TO_WOUNDING		RESPONSE_TO_EXTERNAL_STIMULUS	HOMEOSTATIC_PROCESS	ION_HOMEOSTASIS	CELLULAR_CATION_HOMEOSTASIS	CATION_HOMEOSTASIS		LOCOMOTORY_BEHAVIOR						CELLULAR_HOMEOSTASIS	APOPTOSIS_GO	PROGRAMMED_CELL_DEATH	INFLAMMATORY_RESPONSE	RESPONSE_TO_HYPOXIA										POSITIVE_REGULATION_OF_CATALYTIC_ACTIVITY
CCL3	chemokine (C-C motif) ligand 3	CHEMICAL_HOMEOSTASIS	BEHAVIOR	REGULATION_OF_BIOLOGICAL_QUALITY			RESPONSE_TO_WOUNDING		RESPONSE_TO_EXTERNAL_STIMULUS	HOMEOSTATIC_PROCESS	ION_HOMEOSTASIS	CELLULAR_CATION_HOMEOSTASIS	CATION_HOMEOSTASIS		LOCOMOTORY_BEHAVIOR						CELLULAR_HOMEOSTASIS			INFLAMMATORY_RESPONSE																CELL_CELL_SIGNALING
CCR5	chemokine (C-C motif) receptor 5	CHEMICAL_HOMEOSTASIS	BEHAVIOR	REGULATION_OF_BIOLOGICAL_QUALITY			RESPONSE_TO_WOUNDING		RESPONSE_TO_EXTERNAL_STIMULUS	HOMEOSTATIC_PROCESS	ION_HOMEOSTASIS	CELLULAR_CATION_HOMEOSTASIS	CATION_HOMEOSTASIS		LOCOMOTORY_BEHAVIOR						CELLULAR_HOMEOSTASIS			INFLAMMATORY_RESPONSE																CELL_CELL_SIGNALING
CCL5	chemokine (C-C motif) ligand 5	CHEMICAL_HOMEOSTASIS	BEHAVIOR	REGULATION_OF_BIOLOGICAL_QUALITY			RESPONSE_TO_WOUNDING		RESPONSE_TO_EXTERNAL_STIMULUS	HOMEOSTATIC_PROCESS	ION_HOMEOSTASIS	CELLULAR_CATION_HOMEOSTASIS	CATION_HOMEOSTASIS		LOCOMOTORY_BEHAVIOR						CELLULAR_HOMEOSTASIS			INFLAMMATORY_RESPONSE																CELL_CELL_SIGNALING
CCL11	chemokine (C-C motif) ligand 11	CHEMICAL_HOMEOSTASIS	BEHAVIOR	REGULATION_OF_BIOLOGICAL_QUALITY			RESPONSE_TO_WOUNDING		RESPONSE_TO_EXTERNAL_STIMULUS	HOMEOSTATIC_PROCESS	ION_HOMEOSTASIS	CELLULAR_CATION_HOMEOSTASIS	CATION_HOMEOSTASIS		LOCOMOTORY_BEHAVIOR						CELLULAR_HOMEOSTASIS			INFLAMMATORY_RESPONSE
CCR7	chemokine (C-C motif) receptor 7	CHEMICAL_HOMEOSTASIS	BEHAVIOR	REGULATION_OF_BIOLOGICAL_QUALITY			RESPONSE_TO_WOUNDING		RESPONSE_TO_EXTERNAL_STIMULUS	HOMEOSTATIC_PROCESS	ION_HOMEOSTASIS	CELLULAR_CATION_HOMEOSTASIS	CATION_HOMEOSTASIS		LOCOMOTORY_BEHAVIOR						CELLULAR_HOMEOSTASIS			INFLAMMATORY_RESPONSE
C5AR1	complement component 5a receptor 1	CHEMICAL_HOMEOSTASIS	BEHAVIOR	REGULATION_OF_BIOLOGICAL_QUALITY					RESPONSE_TO_EXTERNAL_STIMULUS	HOMEOSTATIC_PROCESS	ION_HOMEOSTASIS	CELLULAR_CATION_HOMEOSTASIS	CATION_HOMEOSTASIS		LOCOMOTORY_BEHAVIOR						CELLULAR_HOMEOSTASIS														POSITIVE_REGULATION_OF_CATALYTIC_ACTIVITY		SECOND_MESSENGER_MEDIATED_SIGNALING
CCL7	chemokine (C-C motif) ligand 7	CHEMICAL_HOMEOSTASIS	BEHAVIOR	REGULATION_OF_BIOLOGICAL_QUALITY					RESPONSE_TO_EXTERNAL_STIMULUS	HOMEOSTATIC_PROCESS	ION_HOMEOSTASIS	CELLULAR_CATION_HOMEOSTASIS	CATION_HOMEOSTASIS		LOCOMOTORY_BEHAVIOR						CELLULAR_HOMEOSTASIS																			CELL_CELL_SIGNALING
SAA1	serum amyloid A1	CHEMICAL_HOMEOSTASIS	BEHAVIOR	REGULATION_OF_BIOLOGICAL_QUALITY					RESPONSE_TO_EXTERNAL_STIMULUS	HOMEOSTATIC_PROCESS	ION_HOMEOSTASIS	CELLULAR_CATION_HOMEOSTASIS	CATION_HOMEOSTASIS		LOCOMOTORY_BEHAVIOR						CELLULAR_HOMEOSTASIS																									LEUKOCYTE_MIGRATION		LEUKOCYTE_CHEMOTAXIS
CXCL12	chemokine (C-X-C motif) ligand 12 (stromal cell-derived factor 1)	CHEMICAL_HOMEOSTASIS	BEHAVIOR	REGULATION_OF_BIOLOGICAL_QUALITY					RESPONSE_TO_EXTERNAL_STIMULUS	HOMEOSTATIC_PROCESS	ION_HOMEOSTASIS	CELLULAR_CATION_HOMEOSTASIS	CATION_HOMEOSTASIS		LOCOMOTORY_BEHAVIOR						CELLULAR_HOMEOSTASIS
CCR8	chemokine (C-C motif) receptor 8	CHEMICAL_HOMEOSTASIS	BEHAVIOR	REGULATION_OF_BIOLOGICAL_QUALITY					RESPONSE_TO_EXTERNAL_STIMULUS	HOMEOSTATIC_PROCESS	ION_HOMEOSTASIS	CELLULAR_CATION_HOMEOSTASIS	CATION_HOMEOSTASIS		LOCOMOTORY_BEHAVIOR						CELLULAR_HOMEOSTASIS
CXCR3	chemokine (C-X-C motif) receptor 3	CHEMICAL_HOMEOSTASIS	BEHAVIOR	REGULATION_OF_BIOLOGICAL_QUALITY					RESPONSE_TO_EXTERNAL_STIMULUS	HOMEOSTATIC_PROCESS	ION_HOMEOSTASIS	CELLULAR_CATION_HOMEOSTASIS	CATION_HOMEOSTASIS		LOCOMOTORY_BEHAVIOR						CELLULAR_HOMEOSTASIS
APOE	apolipoprotein E	CHEMICAL_HOMEOSTASIS	BEHAVIOR	REGULATION_OF_BIOLOGICAL_QUALITY						HOMEOSTATIC_PROCESS								REGULATION_OF_APOPTOSIS		REGULATION_OF_PROGRAMMED_CELL_DEATH		APOPTOSIS_GO	PROGRAMMED_CELL_DEATH						TRANSMISSION_OF_NERVE_IMPULSE			SYNAPTIC_TRANSMISSION								CELL_CELL_SIGNALING			LIPID_TRANSPORT		LEARNING_AND_OR_MEMORY
BCL2	B-cell CLL/lymphoma 2	CHEMICAL_HOMEOSTASIS		REGULATION_OF_BIOLOGICAL_QUALITY	NEGATIVE_REGULATION_OF_APOPTOSIS	NEGATIVE_REGULATION_OF_DEVELOPMENTAL_PROCESS		NEGATIVE_REGULATION_OF_PROGRAMMED_CELL_DEATH		HOMEOSTATIC_PROCESS	ION_HOMEOSTASIS	CELLULAR_CATION_HOMEOSTASIS	CATION_HOMEOSTASIS				ANTI_APOPTOSIS	REGULATION_OF_APOPTOSIS		REGULATION_OF_PROGRAMMED_CELL_DEATH	CELLULAR_HOMEOSTASIS	APOPTOSIS_GO	PROGRAMMED_CELL_DEATH											NEURON_APOPTOSIS
CLN3	ceroid-lipofuscinosis, neuronal 3, juvenile (Batten, Spielmeyer-Vogt disease)	CHEMICAL_HOMEOSTASIS		REGULATION_OF_BIOLOGICAL_QUALITY	NEGATIVE_REGULATION_OF_APOPTOSIS	NEGATIVE_REGULATION_OF_DEVELOPMENTAL_PROCESS		NEGATIVE_REGULATION_OF_PROGRAMMED_CELL_DEATH		HOMEOSTATIC_PROCESS	ION_HOMEOSTASIS	CELLULAR_CATION_HOMEOSTASIS	CATION_HOMEOSTASIS					REGULATION_OF_APOPTOSIS		REGULATION_OF_PROGRAMMED_CELL_DEATH	CELLULAR_HOMEOSTASIS	APOPTOSIS_GO	PROGRAMMED_CELL_DEATH			AMYLOID_PRECURSOR_PROTEIN_METABOLIC_PROCESS																					GLYCOPROTEIN_CATABOLIC_PROCESS
PPT1	palmitoyl-protein thioesterase 1 (ceroid-lipofuscinosis, neuronal 1, infantile)	CHEMICAL_HOMEOSTASIS		REGULATION_OF_BIOLOGICAL_QUALITY	NEGATIVE_REGULATION_OF_APOPTOSIS	NEGATIVE_REGULATION_OF_DEVELOPMENTAL_PROCESS		NEGATIVE_REGULATION_OF_PROGRAMMED_CELL_DEATH		HOMEOSTATIC_PROCESS	ION_HOMEOSTASIS	CELLULAR_CATION_HOMEOSTASIS	CATION_HOMEOSTASIS					REGULATION_OF_APOPTOSIS		REGULATION_OF_PROGRAMMED_CELL_DEATH	CELLULAR_HOMEOSTASIS	APOPTOSIS_GO	PROGRAMMED_CELL_DEATH				REGULATION_OF_NEURON_APOPTOSIS							NEURON_APOPTOSIS
BNIP3	BCL2/adenovirus E1B 19kDa interacting protein 3	CHEMICAL_HOMEOSTASIS		REGULATION_OF_BIOLOGICAL_QUALITY	NEGATIVE_REGULATION_OF_APOPTOSIS	NEGATIVE_REGULATION_OF_DEVELOPMENTAL_PROCESS		NEGATIVE_REGULATION_OF_PROGRAMMED_CELL_DEATH		HOMEOSTATIC_PROCESS	ION_HOMEOSTASIS						ANTI_APOPTOSIS	REGULATION_OF_APOPTOSIS		REGULATION_OF_PROGRAMMED_CELL_DEATH	CELLULAR_HOMEOSTASIS	APOPTOSIS_GO	PROGRAMMED_CELL_DEATH		RESPONSE_TO_HYPOXIA									NEURON_APOPTOSIS
BAX	BCL2-associated X protein	CHEMICAL_HOMEOSTASIS		REGULATION_OF_BIOLOGICAL_QUALITY	NEGATIVE_REGULATION_OF_APOPTOSIS	NEGATIVE_REGULATION_OF_DEVELOPMENTAL_PROCESS		NEGATIVE_REGULATION_OF_PROGRAMMED_CELL_DEATH		HOMEOSTATIC_PROCESS	ION_HOMEOSTASIS						ANTI_APOPTOSIS	REGULATION_OF_APOPTOSIS		REGULATION_OF_PROGRAMMED_CELL_DEATH	CELLULAR_HOMEOSTASIS	APOPTOSIS_GO	PROGRAMMED_CELL_DEATH				REGULATION_OF_NEURON_APOPTOSIS							NEURON_APOPTOSIS	POSITIVE_REGULATION_OF_CATALYTIC_ACTIVITY
BCL2L1	BCL2-like 1	CHEMICAL_HOMEOSTASIS		REGULATION_OF_BIOLOGICAL_QUALITY	NEGATIVE_REGULATION_OF_APOPTOSIS	NEGATIVE_REGULATION_OF_DEVELOPMENTAL_PROCESS		NEGATIVE_REGULATION_OF_PROGRAMMED_CELL_DEATH		HOMEOSTATIC_PROCESS	ION_HOMEOSTASIS						ANTI_APOPTOSIS	REGULATION_OF_APOPTOSIS		REGULATION_OF_PROGRAMMED_CELL_DEATH	CELLULAR_HOMEOSTASIS	APOPTOSIS_GO	PROGRAMMED_CELL_DEATH
CALCA	calcitonin/calcitonin-related polypeptide, alpha	CHEMICAL_HOMEOSTASIS		REGULATION_OF_BIOLOGICAL_QUALITY		NEGATIVE_REGULATION_OF_DEVELOPMENTAL_PROCESS				HOMEOSTATIC_PROCESS	ION_HOMEOSTASIS	CELLULAR_CATION_HOMEOSTASIS	CATION_HOMEOSTASIS			G_PROTEIN_SIGNALING_COUPLED_TO_CYCLIC_NUCLEOTIDE_SECOND_MESSENGER			CYCLIC_NUCLEOTIDE_MEDIATED_SIGNALING		CELLULAR_HOMEOSTASIS							G_PROTEIN_SIGNALING_COUPLED_TO_CAMP_NUCLEOTIDE_SECOND_MESSENGER		G_PROTEIN_SIGNALING_ADENYLATE_CYCLASE_ACTIVATING_PATHWAY	CAMP_MEDIATED_SIGNALING				POSITIVE_REGULATION_OF_CATALYTIC_ACTIVITY		SECOND_MESSENGER_MEDIATED_SIGNALING		REGULATION_OF_BLOOD_PRESSURE	CELL_CELL_SIGNALING
THY1	Thy-1 cell surface antigen	CHEMICAL_HOMEOSTASIS		REGULATION_OF_BIOLOGICAL_QUALITY		NEGATIVE_REGULATION_OF_DEVELOPMENTAL_PROCESS				HOMEOSTATIC_PROCESS	ION_HOMEOSTASIS	CELLULAR_CATION_HOMEOSTASIS	CATION_HOMEOSTASIS								CELLULAR_HOMEOSTASIS														POSITIVE_REGULATION_OF_CATALYTIC_ACTIVITY
NPPB	natriuretic peptide precursor B	CHEMICAL_HOMEOSTASIS		REGULATION_OF_BIOLOGICAL_QUALITY		NEGATIVE_REGULATION_OF_DEVELOPMENTAL_PROCESS				HOMEOSTATIC_PROCESS	ION_HOMEOSTASIS
NPR1	natriuretic peptide receptor A/guanylate cyclase A (atrionatriuretic peptide receptor A)	CHEMICAL_HOMEOSTASIS		REGULATION_OF_BIOLOGICAL_QUALITY		NEGATIVE_REGULATION_OF_DEVELOPMENTAL_PROCESS				HOMEOSTATIC_PROCESS	ION_HOMEOSTASIS
CHRNA7	cholinergic receptor, nicotinic, alpha 7	CHEMICAL_HOMEOSTASIS		REGULATION_OF_BIOLOGICAL_QUALITY			RESPONSE_TO_WOUNDING		RESPONSE_TO_EXTERNAL_STIMULUS	HOMEOSTATIC_PROCESS	ION_HOMEOSTASIS	CELLULAR_CATION_HOMEOSTASIS	CATION_HOMEOSTASIS	REGULATION_OF_RESPONSE_TO_EXTERNAL_STIMULUS							CELLULAR_HOMEOSTASIS			INFLAMMATORY_RESPONSE	RESPONSE_TO_HYPOXIA										POSITIVE_REGULATION_OF_CATALYTIC_ACTIVITY			NEGATIVE_REGULATION_OF_RESPONSE_TO_STIMULUS
CCR1	chemokine (C-C motif) receptor 1	CHEMICAL_HOMEOSTASIS		REGULATION_OF_BIOLOGICAL_QUALITY			RESPONSE_TO_WOUNDING		RESPONSE_TO_EXTERNAL_STIMULUS	HOMEOSTATIC_PROCESS	ION_HOMEOSTASIS	CELLULAR_CATION_HOMEOSTASIS	CATION_HOMEOSTASIS			G_PROTEIN_SIGNALING_COUPLED_TO_CYCLIC_NUCLEOTIDE_SECOND_MESSENGER			CYCLIC_NUCLEOTIDE_MEDIATED_SIGNALING		CELLULAR_HOMEOSTASIS			INFLAMMATORY_RESPONSE													SECOND_MESSENGER_MEDIATED_SIGNALING			CELL_CELL_SIGNALING
KNG1	kininogen 1	CHEMICAL_HOMEOSTASIS		REGULATION_OF_BIOLOGICAL_QUALITY			RESPONSE_TO_WOUNDING		RESPONSE_TO_EXTERNAL_STIMULUS	HOMEOSTATIC_PROCESS	ION_HOMEOSTASIS	CELLULAR_CATION_HOMEOSTASIS	CATION_HOMEOSTASIS								CELLULAR_HOMEOSTASIS			INFLAMMATORY_RESPONSE																	HEMOSTASIS	BLOOD_COAGULATION							WOUND_HEALING
APOA5	apolipoprotein A-V	CHEMICAL_HOMEOSTASIS		REGULATION_OF_BIOLOGICAL_QUALITY			RESPONSE_TO_WOUNDING		RESPONSE_TO_EXTERNAL_STIMULUS	HOMEOSTATIC_PROCESS																									POSITIVE_REGULATION_OF_CATALYTIC_ACTIVITY														WOUND_HEALING
STC1	stanniocalcin 1	CHEMICAL_HOMEOSTASIS		REGULATION_OF_BIOLOGICAL_QUALITY					RESPONSE_TO_EXTERNAL_STIMULUS	HOMEOSTATIC_PROCESS	ION_HOMEOSTASIS	CELLULAR_CATION_HOMEOSTASIS	CATION_HOMEOSTASIS								CELLULAR_HOMEOSTASIS																			CELL_CELL_SIGNALING
PCSK9	proprotein convertase subtilisin/kexin type 9	CHEMICAL_HOMEOSTASIS		REGULATION_OF_BIOLOGICAL_QUALITY					RESPONSE_TO_EXTERNAL_STIMULUS	HOMEOSTATIC_PROCESS								REGULATION_OF_APOPTOSIS		REGULATION_OF_PROGRAMMED_CELL_DEATH		APOPTOSIS_GO	PROGRAMMED_CELL_DEATH				REGULATION_OF_NEURON_APOPTOSIS						CELLULAR_RESPONSE_TO_STIMULUS	NEURON_APOPTOSIS
DRD1	dopamine receptor D1	CHEMICAL_HOMEOSTASIS		REGULATION_OF_BIOLOGICAL_QUALITY						HOMEOSTATIC_PROCESS	ION_HOMEOSTASIS	CELLULAR_CATION_HOMEOSTASIS	CATION_HOMEOSTASIS			G_PROTEIN_SIGNALING_COUPLED_TO_CYCLIC_NUCLEOTIDE_SECOND_MESSENGER			CYCLIC_NUCLEOTIDE_MEDIATED_SIGNALING		CELLULAR_HOMEOSTASIS							G_PROTEIN_SIGNALING_COUPLED_TO_CAMP_NUCLEOTIDE_SECOND_MESSENGER	TRANSMISSION_OF_NERVE_IMPULSE	G_PROTEIN_SIGNALING_ADENYLATE_CYCLASE_ACTIVATING_PATHWAY	CAMP_MEDIATED_SIGNALING	SYNAPTIC_TRANSMISSION					SECOND_MESSENGER_MEDIATED_SIGNALING			CELL_CELL_SIGNALING
GLP1R	glucagon-like peptide 1 receptor	CHEMICAL_HOMEOSTASIS		REGULATION_OF_BIOLOGICAL_QUALITY						HOMEOSTATIC_PROCESS	ION_HOMEOSTASIS	CELLULAR_CATION_HOMEOSTASIS	CATION_HOMEOSTASIS			G_PROTEIN_SIGNALING_COUPLED_TO_CYCLIC_NUCLEOTIDE_SECOND_MESSENGER			CYCLIC_NUCLEOTIDE_MEDIATED_SIGNALING		CELLULAR_HOMEOSTASIS							G_PROTEIN_SIGNALING_COUPLED_TO_CAMP_NUCLEOTIDE_SECOND_MESSENGER		G_PROTEIN_SIGNALING_ADENYLATE_CYCLASE_ACTIVATING_PATHWAY	CAMP_MEDIATED_SIGNALING				POSITIVE_REGULATION_OF_CATALYTIC_ACTIVITY		SECOND_MESSENGER_MEDIATED_SIGNALING
OPRL1	opiate receptor-like 1	CHEMICAL_HOMEOSTASIS		REGULATION_OF_BIOLOGICAL_QUALITY						HOMEOSTATIC_PROCESS	ION_HOMEOSTASIS	CELLULAR_CATION_HOMEOSTASIS	CATION_HOMEOSTASIS			G_PROTEIN_SIGNALING_COUPLED_TO_CYCLIC_NUCLEOTIDE_SECOND_MESSENGER			CYCLIC_NUCLEOTIDE_MEDIATED_SIGNALING		CELLULAR_HOMEOSTASIS							G_PROTEIN_SIGNALING_COUPLED_TO_CAMP_NUCLEOTIDE_SECOND_MESSENGER			CAMP_MEDIATED_SIGNALING						SECOND_MESSENGER_MEDIATED_SIGNALING
PTPRC	protein tyrosine phosphatase, receptor type, C	CHEMICAL_HOMEOSTASIS		REGULATION_OF_BIOLOGICAL_QUALITY						HOMEOSTATIC_PROCESS	ION_HOMEOSTASIS	CELLULAR_CATION_HOMEOSTASIS	CATION_HOMEOSTASIS					REGULATION_OF_APOPTOSIS		REGULATION_OF_PROGRAMMED_CELL_DEATH	CELLULAR_HOMEOSTASIS	APOPTOSIS_GO	PROGRAMMED_CELL_DEATH															NEGATIVE_REGULATION_OF_RESPONSE_TO_STIMULUS
CALR	calreticulin	CHEMICAL_HOMEOSTASIS		REGULATION_OF_BIOLOGICAL_QUALITY						HOMEOSTATIC_PROCESS	ION_HOMEOSTASIS	CELLULAR_CATION_HOMEOSTASIS	CATION_HOMEOSTASIS					REGULATION_OF_APOPTOSIS		REGULATION_OF_PROGRAMMED_CELL_DEATH	CELLULAR_HOMEOSTASIS	APOPTOSIS_GO	PROGRAMMED_CELL_DEATH
FXN	frataxin	CHEMICAL_HOMEOSTASIS		REGULATION_OF_BIOLOGICAL_QUALITY						HOMEOSTATIC_PROCESS	ION_HOMEOSTASIS	CELLULAR_CATION_HOMEOSTASIS	CATION_HOMEOSTASIS								CELLULAR_HOMEOSTASIS								TRANSMISSION_OF_NERVE_IMPULSE			SYNAPTIC_TRANSMISSION								CELL_CELL_SIGNALING
SRI	sorcin	CHEMICAL_HOMEOSTASIS		REGULATION_OF_BIOLOGICAL_QUALITY						HOMEOSTATIC_PROCESS	ION_HOMEOSTASIS	CELLULAR_CATION_HOMEOSTASIS	CATION_HOMEOSTASIS								CELLULAR_HOMEOSTASIS								TRANSMISSION_OF_NERVE_IMPULSE											CELL_CELL_SIGNALING
AVPR1B	arginine vasopressin receptor 1B	CHEMICAL_HOMEOSTASIS		REGULATION_OF_BIOLOGICAL_QUALITY						HOMEOSTATIC_PROCESS	ION_HOMEOSTASIS	CELLULAR_CATION_HOMEOSTASIS	CATION_HOMEOSTASIS								CELLULAR_HOMEOSTASIS														POSITIVE_REGULATION_OF_CATALYTIC_ACTIVITY		SECOND_MESSENGER_MEDIATED_SIGNALING
AGTR1	angiotensin II receptor, type 1	CHEMICAL_HOMEOSTASIS		REGULATION_OF_BIOLOGICAL_QUALITY						HOMEOSTATIC_PROCESS	ION_HOMEOSTASIS	CELLULAR_CATION_HOMEOSTASIS	CATION_HOMEOSTASIS								CELLULAR_HOMEOSTASIS																SECOND_MESSENGER_MEDIATED_SIGNALING
CLN5	ceroid-lipofuscinosis, neuronal 5	CHEMICAL_HOMEOSTASIS		REGULATION_OF_BIOLOGICAL_QUALITY						HOMEOSTATIC_PROCESS	ION_HOMEOSTASIS	CELLULAR_CATION_HOMEOSTASIS	CATION_HOMEOSTASIS								CELLULAR_HOMEOSTASIS
CLN6	ceroid-lipofuscinosis, neuronal 6, late infantile, variant	CHEMICAL_HOMEOSTASIS		REGULATION_OF_BIOLOGICAL_QUALITY						HOMEOSTATIC_PROCESS	ION_HOMEOSTASIS	CELLULAR_CATION_HOMEOSTASIS	CATION_HOMEOSTASIS								CELLULAR_HOMEOSTASIS
ATP1A2	ATPase, Na+/K+ transporting, alpha 2 (+) polypeptide	CHEMICAL_HOMEOSTASIS		REGULATION_OF_BIOLOGICAL_QUALITY						HOMEOSTATIC_PROCESS	ION_HOMEOSTASIS	CELLULAR_CATION_HOMEOSTASIS	CATION_HOMEOSTASIS								CELLULAR_HOMEOSTASIS
HFE	hemochromatosis	CHEMICAL_HOMEOSTASIS		REGULATION_OF_BIOLOGICAL_QUALITY						HOMEOSTATIC_PROCESS	ION_HOMEOSTASIS	CELLULAR_CATION_HOMEOSTASIS	CATION_HOMEOSTASIS								CELLULAR_HOMEOSTASIS
MYC	v-myc myelocytomatosis viral oncogene homolog (avian)	CHEMICAL_HOMEOSTASIS		REGULATION_OF_BIOLOGICAL_QUALITY						HOMEOSTATIC_PROCESS	ION_HOMEOSTASIS	CELLULAR_CATION_HOMEOSTASIS	CATION_HOMEOSTASIS								CELLULAR_HOMEOSTASIS
CACNA1A	calcium channel, voltage-dependent, P/Q type, alpha 1A subunit	CHEMICAL_HOMEOSTASIS		REGULATION_OF_BIOLOGICAL_QUALITY						HOMEOSTATIC_PROCESS	ION_HOMEOSTASIS	CELLULAR_CATION_HOMEOSTASIS	CATION_HOMEOSTASIS								CELLULAR_HOMEOSTASIS
F2RL1	coagulation factor II (thrombin) receptor-like 1	CHEMICAL_HOMEOSTASIS		REGULATION_OF_BIOLOGICAL_QUALITY						HOMEOSTATIC_PROCESS	ION_HOMEOSTASIS	CELLULAR_CATION_HOMEOSTASIS	CATION_HOMEOSTASIS								CELLULAR_HOMEOSTASIS
ATP7B	ATPase, Cu++ transporting, beta polypeptide	CHEMICAL_HOMEOSTASIS		REGULATION_OF_BIOLOGICAL_QUALITY						HOMEOSTATIC_PROCESS	ION_HOMEOSTASIS	CELLULAR_CATION_HOMEOSTASIS	CATION_HOMEOSTASIS								CELLULAR_HOMEOSTASIS
FTH1	ferritin, heavy polypeptide 1	CHEMICAL_HOMEOSTASIS		REGULATION_OF_BIOLOGICAL_QUALITY						HOMEOSTATIC_PROCESS	ION_HOMEOSTASIS	CELLULAR_CATION_HOMEOSTASIS	CATION_HOMEOSTASIS								CELLULAR_HOMEOSTASIS
HPX	hemopexin	CHEMICAL_HOMEOSTASIS		REGULATION_OF_BIOLOGICAL_QUALITY						HOMEOSTATIC_PROCESS	ION_HOMEOSTASIS	CELLULAR_CATION_HOMEOSTASIS	CATION_HOMEOSTASIS								CELLULAR_HOMEOSTASIS
TAC1	tachykinin, precursor 1 (substance K, substance P, neurokinin 1, neurokinin 2, neuromedin L, neurokinin alpha, neuropeptide K, neuropeptide gamma)	CHEMICAL_HOMEOSTASIS		REGULATION_OF_BIOLOGICAL_QUALITY						HOMEOSTATIC_PROCESS	ION_HOMEOSTASIS	CELLULAR_CATION_HOMEOSTASIS	CATION_HOMEOSTASIS								CELLULAR_HOMEOSTASIS
APP	amyloid beta (A4) precursor protein (peptidase nexin-II, Alzheimer disease)	CHEMICAL_HOMEOSTASIS		REGULATION_OF_BIOLOGICAL_QUALITY						HOMEOSTATIC_PROCESS	ION_HOMEOSTASIS	CELLULAR_CATION_HOMEOSTASIS	CATION_HOMEOSTASIS								CELLULAR_HOMEOSTASIS
CD55	CD55 molecule, decay accelerating factor for complement (Cromer blood group)	CHEMICAL_HOMEOSTASIS		REGULATION_OF_BIOLOGICAL_QUALITY						HOMEOSTATIC_PROCESS	ION_HOMEOSTASIS	CELLULAR_CATION_HOMEOSTASIS	CATION_HOMEOSTASIS								CELLULAR_HOMEOSTASIS
CP	ceruloplasmin (ferroxidase)	CHEMICAL_HOMEOSTASIS		REGULATION_OF_BIOLOGICAL_QUALITY						HOMEOSTATIC_PROCESS	ION_HOMEOSTASIS	CELLULAR_CATION_HOMEOSTASIS	CATION_HOMEOSTASIS								CELLULAR_HOMEOSTASIS
FTL	ferritin, light polypeptide	CHEMICAL_HOMEOSTASIS		REGULATION_OF_BIOLOGICAL_QUALITY						HOMEOSTATIC_PROCESS	ION_HOMEOSTASIS	CELLULAR_CATION_HOMEOSTASIS	CATION_HOMEOSTASIS								CELLULAR_HOMEOSTASIS
SLC9A1	solute carrier family 9 (sodium/hydrogen exchanger), member 1 (antiporter, Na+/H+, amiloride sensitive)	CHEMICAL_HOMEOSTASIS		REGULATION_OF_BIOLOGICAL_QUALITY						HOMEOSTATIC_PROCESS	ION_HOMEOSTASIS		CATION_HOMEOSTASIS
BAK1	BCL2-antagonist/killer 1	CHEMICAL_HOMEOSTASIS		REGULATION_OF_BIOLOGICAL_QUALITY						HOMEOSTATIC_PROCESS	ION_HOMEOSTASIS							REGULATION_OF_APOPTOSIS		REGULATION_OF_PROGRAMMED_CELL_DEATH	CELLULAR_HOMEOSTASIS	APOPTOSIS_GO	PROGRAMMED_CELL_DEATH
SLC4A1	solute carrier family 4, anion exchanger, member 1 (erythrocyte membrane protein band 3, Diego blood group)	CHEMICAL_HOMEOSTASIS		REGULATION_OF_BIOLOGICAL_QUALITY						HOMEOSTATIC_PROCESS	ION_HOMEOSTASIS										CELLULAR_HOMEOSTASIS
RHAG	Rh-associated glycoprotein	CHEMICAL_HOMEOSTASIS		REGULATION_OF_BIOLOGICAL_QUALITY						HOMEOSTATIC_PROCESS	ION_HOMEOSTASIS										CELLULAR_HOMEOSTASIS
HIF1A	hypoxia-inducible factor 1, alpha subunit (basic helix-loop-helix transcription factor)	CHEMICAL_HOMEOSTASIS		REGULATION_OF_BIOLOGICAL_QUALITY						HOMEOSTATIC_PROCESS															RESPONSE_TO_HYPOXIA
NARFL	nuclear prelamin A recognition factor-like	CHEMICAL_HOMEOSTASIS		REGULATION_OF_BIOLOGICAL_QUALITY						HOMEOSTATIC_PROCESS															RESPONSE_TO_HYPOXIA
TARBP2	Tar (HIV-1) RNA binding protein 2	CHEMICAL_HOMEOSTASIS		REGULATION_OF_BIOLOGICAL_QUALITY						HOMEOSTATIC_PROCESS																												NEGATIVE_REGULATION_OF_RESPONSE_TO_STIMULUS
ABCA1	ATP-binding cassette, sub-family A (ABC1), member 1	CHEMICAL_HOMEOSTASIS		REGULATION_OF_BIOLOGICAL_QUALITY						HOMEOSTATIC_PROCESS																																	LIPID_TRANSPORT
APOA4	apolipoprotein A-IV	CHEMICAL_HOMEOSTASIS		REGULATION_OF_BIOLOGICAL_QUALITY						HOMEOSTATIC_PROCESS																																	LIPID_TRANSPORT
NPC2	Niemann-Pick disease, type C2	CHEMICAL_HOMEOSTASIS		REGULATION_OF_BIOLOGICAL_QUALITY						HOMEOSTATIC_PROCESS																																	LIPID_TRANSPORT
APOA2	apolipoprotein A-II	CHEMICAL_HOMEOSTASIS		REGULATION_OF_BIOLOGICAL_QUALITY						HOMEOSTATIC_PROCESS																																	LIPID_TRANSPORT
APOA1	apolipoprotein A-I	CHEMICAL_HOMEOSTASIS		REGULATION_OF_BIOLOGICAL_QUALITY						HOMEOSTATIC_PROCESS																																	LIPID_TRANSPORT
CETP	cholesteryl ester transfer protein, plasma	CHEMICAL_HOMEOSTASIS		REGULATION_OF_BIOLOGICAL_QUALITY						HOMEOSTATIC_PROCESS																																	LIPID_TRANSPORT
LCAT	lecithin-cholesterol acyltransferase	CHEMICAL_HOMEOSTASIS		REGULATION_OF_BIOLOGICAL_QUALITY						HOMEOSTATIC_PROCESS																																	LIPID_TRANSPORT
NF1	neurofibromin 1 (neurofibromatosis, von Recklinghausen disease, Watson disease)		BEHAVIOR	REGULATION_OF_BIOLOGICAL_QUALITY		NEGATIVE_REGULATION_OF_DEVELOPMENTAL_PROCESS	RESPONSE_TO_WOUNDING		RESPONSE_TO_EXTERNAL_STIMULUS	HOMEOSTATIC_PROCESS						G_PROTEIN_SIGNALING_COUPLED_TO_CYCLIC_NUCLEOTIDE_SECOND_MESSENGER		REGULATION_OF_APOPTOSIS	CYCLIC_NUCLEOTIDE_MEDIATED_SIGNALING	REGULATION_OF_PROGRAMMED_CELL_DEATH		APOPTOSIS_GO	PROGRAMMED_CELL_DEATH		RESPONSE_TO_HYPOXIA		REGULATION_OF_NEURON_APOPTOSIS	G_PROTEIN_SIGNALING_COUPLED_TO_CAMP_NUCLEOTIDE_SECOND_MESSENGER	TRANSMISSION_OF_NERVE_IMPULSE		CAMP_MEDIATED_SIGNALING			NEURON_APOPTOSIS	POSITIVE_REGULATION_OF_CATALYTIC_ACTIVITY		SECOND_MESSENGER_MEDIATED_SIGNALING			CELL_CELL_SIGNALING					LEARNING_AND_OR_MEMORY				WOUND_HEALING
KLK8	kallikrein 8 (neuropsin/ovasin)		BEHAVIOR	REGULATION_OF_BIOLOGICAL_QUALITY		NEGATIVE_REGULATION_OF_DEVELOPMENTAL_PROCESS	RESPONSE_TO_WOUNDING		RESPONSE_TO_EXTERNAL_STIMULUS					REGULATION_OF_RESPONSE_TO_EXTERNAL_STIMULUS															TRANSMISSION_OF_NERVE_IMPULSE			SYNAPTIC_TRANSMISSION						NEGATIVE_REGULATION_OF_RESPONSE_TO_STIMULUS		CELL_CELL_SIGNALING					LEARNING_AND_OR_MEMORY				WOUND_HEALING
TGFB2	transforming growth factor, beta 2		BEHAVIOR	REGULATION_OF_BIOLOGICAL_QUALITY			RESPONSE_TO_WOUNDING		RESPONSE_TO_EXTERNAL_STIMULUS						LOCOMOTORY_BEHAVIOR			REGULATION_OF_APOPTOSIS		REGULATION_OF_PROGRAMMED_CELL_DEATH		APOPTOSIS_GO	PROGRAMMED_CELL_DEATH		RESPONSE_TO_HYPOXIA		REGULATION_OF_NEURON_APOPTOSIS		TRANSMISSION_OF_NERVE_IMPULSE			SYNAPTIC_TRANSMISSION		NEURON_APOPTOSIS		REGULATION_OF_NEUROTRANSMITTER_LEVELS		NEGATIVE_REGULATION_OF_RESPONSE_TO_STIMULUS		CELL_CELL_SIGNALING						LEUKOCYTE_MIGRATION		LEUKOCYTE_CHEMOTAXIS	WOUND_HEALING
SFTPD	surfactant, pulmonary-associated protein D		BEHAVIOR	REGULATION_OF_BIOLOGICAL_QUALITY					RESPONSE_TO_EXTERNAL_STIMULUS	HOMEOSTATIC_PROCESS					LOCOMOTORY_BEHAVIOR																															LEUKOCYTE_MIGRATION		LEUKOCYTE_CHEMOTAXIS
NPY	neuropeptide Y		BEHAVIOR	REGULATION_OF_BIOLOGICAL_QUALITY					RESPONSE_TO_EXTERNAL_STIMULUS					REGULATION_OF_RESPONSE_TO_EXTERNAL_STIMULUS		G_PROTEIN_SIGNALING_COUPLED_TO_CYCLIC_NUCLEOTIDE_SECOND_MESSENGER			CYCLIC_NUCLEOTIDE_MEDIATED_SIGNALING										TRANSMISSION_OF_NERVE_IMPULSE			SYNAPTIC_TRANSMISSION					SECOND_MESSENGER_MEDIATED_SIGNALING			CELL_CELL_SIGNALING
LEP	leptin (obesity homolog, mouse)		BEHAVIOR	REGULATION_OF_BIOLOGICAL_QUALITY					RESPONSE_TO_EXTERNAL_STIMULUS					REGULATION_OF_RESPONSE_TO_EXTERNAL_STIMULUS																								NEGATIVE_REGULATION_OF_RESPONSE_TO_STIMULUS
AGTR2	angiotensin II receptor, type 2		BEHAVIOR	REGULATION_OF_BIOLOGICAL_QUALITY																		APOPTOSIS_GO	PROGRAMMED_CELL_DEATH																REGULATION_OF_BLOOD_PRESSURE
SCG2	secretogranin II (chromogranin C)		BEHAVIOR		NEGATIVE_REGULATION_OF_APOPTOSIS	NEGATIVE_REGULATION_OF_DEVELOPMENTAL_PROCESS	RESPONSE_TO_WOUNDING	NEGATIVE_REGULATION_OF_PROGRAMMED_CELL_DEATH	RESPONSE_TO_EXTERNAL_STIMULUS					REGULATION_OF_RESPONSE_TO_EXTERNAL_STIMULUS	LOCOMOTORY_BEHAVIOR			REGULATION_OF_APOPTOSIS		REGULATION_OF_PROGRAMMED_CELL_DEATH		APOPTOSIS_GO	PROGRAMMED_CELL_DEATH	INFLAMMATORY_RESPONSE																						LEUKOCYTE_MIGRATION		LEUKOCYTE_CHEMOTAXIS
CDH13	cadherin 13, H-cadherin (heart)		BEHAVIOR		NEGATIVE_REGULATION_OF_APOPTOSIS	NEGATIVE_REGULATION_OF_DEVELOPMENTAL_PROCESS		NEGATIVE_REGULATION_OF_PROGRAMMED_CELL_DEATH	RESPONSE_TO_EXTERNAL_STIMULUS					REGULATION_OF_RESPONSE_TO_EXTERNAL_STIMULUS	LOCOMOTORY_BEHAVIOR		ANTI_APOPTOSIS	REGULATION_OF_APOPTOSIS		REGULATION_OF_PROGRAMMED_CELL_DEATH		APOPTOSIS_GO	PROGRAMMED_CELL_DEATH														SECOND_MESSENGER_MEDIATED_SIGNALING
IL4	interleukin 4		BEHAVIOR		NEGATIVE_REGULATION_OF_APOPTOSIS	NEGATIVE_REGULATION_OF_DEVELOPMENTAL_PROCESS		NEGATIVE_REGULATION_OF_PROGRAMMED_CELL_DEATH	RESPONSE_TO_EXTERNAL_STIMULUS						LOCOMOTORY_BEHAVIOR			REGULATION_OF_APOPTOSIS		REGULATION_OF_PROGRAMMED_CELL_DEATH		APOPTOSIS_GO	PROGRAMMED_CELL_DEATH
IL8	interleukin 8		BEHAVIOR				RESPONSE_TO_WOUNDING		RESPONSE_TO_EXTERNAL_STIMULUS					REGULATION_OF_RESPONSE_TO_EXTERNAL_STIMULUS	LOCOMOTORY_BEHAVIOR									INFLAMMATORY_RESPONSE													SECOND_MESSENGER_MEDIATED_SIGNALING									LEUKOCYTE_MIGRATION		LEUKOCYTE_CHEMOTAXIS
CX3CL1	chemokine (C-X3-C motif) ligand 1		BEHAVIOR				RESPONSE_TO_WOUNDING		RESPONSE_TO_EXTERNAL_STIMULUS					REGULATION_OF_RESPONSE_TO_EXTERNAL_STIMULUS	LOCOMOTORY_BEHAVIOR									INFLAMMATORY_RESPONSE																						LEUKOCYTE_MIGRATION		LEUKOCYTE_CHEMOTAXIS
PTAFR	platelet-activating factor receptor		BEHAVIOR				RESPONSE_TO_WOUNDING		RESPONSE_TO_EXTERNAL_STIMULUS						LOCOMOTORY_BEHAVIOR									INFLAMMATORY_RESPONSE													SECOND_MESSENGER_MEDIATED_SIGNALING
CXCL10	chemokine (C-X-C motif) ligand 10		BEHAVIOR				RESPONSE_TO_WOUNDING		RESPONSE_TO_EXTERNAL_STIMULUS						LOCOMOTORY_BEHAVIOR									INFLAMMATORY_RESPONSE																CELL_CELL_SIGNALING
CXCL9	chemokine (C-X-C motif) ligand 9		BEHAVIOR				RESPONSE_TO_WOUNDING		RESPONSE_TO_EXTERNAL_STIMULUS						LOCOMOTORY_BEHAVIOR									INFLAMMATORY_RESPONSE																CELL_CELL_SIGNALING
CCL22	chemokine (C-C motif) ligand 22		BEHAVIOR				RESPONSE_TO_WOUNDING		RESPONSE_TO_EXTERNAL_STIMULUS						LOCOMOTORY_BEHAVIOR									INFLAMMATORY_RESPONSE																CELL_CELL_SIGNALING
CXCL11	chemokine (C-X-C motif) ligand 11		BEHAVIOR				RESPONSE_TO_WOUNDING		RESPONSE_TO_EXTERNAL_STIMULUS						LOCOMOTORY_BEHAVIOR									INFLAMMATORY_RESPONSE																CELL_CELL_SIGNALING
CXCL1	chemokine (C-X-C motif) ligand 1 (melanoma growth stimulating activity, alpha)		BEHAVIOR				RESPONSE_TO_WOUNDING		RESPONSE_TO_EXTERNAL_STIMULUS						LOCOMOTORY_BEHAVIOR									INFLAMMATORY_RESPONSE
CX3CR1	chemokine (C-X3-C motif) receptor 1		BEHAVIOR				RESPONSE_TO_WOUNDING		RESPONSE_TO_EXTERNAL_STIMULUS						LOCOMOTORY_BEHAVIOR
MAPK1	mitogen-activated protein kinase 1		BEHAVIOR						RESPONSE_TO_EXTERNAL_STIMULUS						LOCOMOTORY_BEHAVIOR			REGULATION_OF_APOPTOSIS		REGULATION_OF_PROGRAMMED_CELL_DEATH		APOPTOSIS_GO	PROGRAMMED_CELL_DEATH						TRANSMISSION_OF_NERVE_IMPULSE			SYNAPTIC_TRANSMISSION								CELL_CELL_SIGNALING
FGF2	fibroblast growth factor 2 (basic)		BEHAVIOR						RESPONSE_TO_EXTERNAL_STIMULUS						LOCOMOTORY_BEHAVIOR																				POSITIVE_REGULATION_OF_CATALYTIC_ACTIVITY
CXCL5	chemokine (C-X-C motif) ligand 5		BEHAVIOR						RESPONSE_TO_EXTERNAL_STIMULUS						LOCOMOTORY_BEHAVIOR																									CELL_CELL_SIGNALING
CCL17	chemokine (C-C motif) ligand 17		BEHAVIOR						RESPONSE_TO_EXTERNAL_STIMULUS						LOCOMOTORY_BEHAVIOR																									CELL_CELL_SIGNALING
CCL8	chemokine (C-C motif) ligand 8		BEHAVIOR						RESPONSE_TO_EXTERNAL_STIMULUS						LOCOMOTORY_BEHAVIOR																									CELL_CELL_SIGNALING
ITGB2	integrin, beta 2 (complement component 3 receptor 3 and 4 subunit)		BEHAVIOR						RESPONSE_TO_EXTERNAL_STIMULUS						LOCOMOTORY_BEHAVIOR																															LEUKOCYTE_MIGRATION		LEUKOCYTE_CHEMOTAXIS
IL10	interleukin 10		BEHAVIOR						RESPONSE_TO_EXTERNAL_STIMULUS						LOCOMOTORY_BEHAVIOR																															LEUKOCYTE_MIGRATION		LEUKOCYTE_CHEMOTAXIS
DEFB1	defensin, beta 1		BEHAVIOR						RESPONSE_TO_EXTERNAL_STIMULUS						LOCOMOTORY_BEHAVIOR
MAPK14	mitogen-activated protein kinase 14		BEHAVIOR						RESPONSE_TO_EXTERNAL_STIMULUS						LOCOMOTORY_BEHAVIOR
PLAU	plasminogen activator, urokinase		BEHAVIOR						RESPONSE_TO_EXTERNAL_STIMULUS						LOCOMOTORY_BEHAVIOR
HRAS	v-Ha-ras Harvey rat sarcoma viral oncogene homolog		BEHAVIOR						RESPONSE_TO_EXTERNAL_STIMULUS						LOCOMOTORY_BEHAVIOR
MAP2K1	mitogen-activated protein kinase kinase 1		BEHAVIOR						RESPONSE_TO_EXTERNAL_STIMULUS						LOCOMOTORY_BEHAVIOR
CCL28	chemokine (C-C motif) ligand 28		BEHAVIOR						RESPONSE_TO_EXTERNAL_STIMULUS						LOCOMOTORY_BEHAVIOR
PLAUR	plasminogen activator, urokinase receptor		BEHAVIOR						RESPONSE_TO_EXTERNAL_STIMULUS						LOCOMOTORY_BEHAVIOR
NOVA1	neuro-oncological ventral antigen 1		BEHAVIOR												LOCOMOTORY_BEHAVIOR														TRANSMISSION_OF_NERVE_IMPULSE			SYNAPTIC_TRANSMISSION								CELL_CELL_SIGNALING
OPRK1	opioid receptor, kappa 1		BEHAVIOR													G_PROTEIN_SIGNALING_COUPLED_TO_CYCLIC_NUCLEOTIDE_SECOND_MESSENGER			CYCLIC_NUCLEOTIDE_MEDIATED_SIGNALING									G_PROTEIN_SIGNALING_COUPLED_TO_CAMP_NUCLEOTIDE_SECOND_MESSENGER	TRANSMISSION_OF_NERVE_IMPULSE		CAMP_MEDIATED_SIGNALING	SYNAPTIC_TRANSMISSION					SECOND_MESSENGER_MEDIATED_SIGNALING			CELL_CELL_SIGNALING
CNR2	cannabinoid receptor 2 (macrophage)		BEHAVIOR													G_PROTEIN_SIGNALING_COUPLED_TO_CYCLIC_NUCLEOTIDE_SECOND_MESSENGER			CYCLIC_NUCLEOTIDE_MEDIATED_SIGNALING																		SECOND_MESSENGER_MEDIATED_SIGNALING
OPRM1	opioid receptor, mu 1		BEHAVIOR													G_PROTEIN_SIGNALING_COUPLED_TO_CYCLIC_NUCLEOTIDE_SECOND_MESSENGER			CYCLIC_NUCLEOTIDE_MEDIATED_SIGNALING																		SECOND_MESSENGER_MEDIATED_SIGNALING
CNR1	cannabinoid receptor 1 (brain)		BEHAVIOR													G_PROTEIN_SIGNALING_COUPLED_TO_CYCLIC_NUCLEOTIDE_SECOND_MESSENGER			CYCLIC_NUCLEOTIDE_MEDIATED_SIGNALING																		SECOND_MESSENGER_MEDIATED_SIGNALING
DLG4	discs, large homolog 4 (Drosophila)		BEHAVIOR																										TRANSMISSION_OF_NERVE_IMPULSE			SYNAPTIC_TRANSMISSION								CELL_CELL_SIGNALING					LEARNING_AND_OR_MEMORY
CRH	corticotropin releasing hormone		BEHAVIOR																										TRANSMISSION_OF_NERVE_IMPULSE			SYNAPTIC_TRANSMISSION								CELL_CELL_SIGNALING					LEARNING_AND_OR_MEMORY
HTR2C	5-hydroxytryptamine (serotonin) receptor 2C		BEHAVIOR																										TRANSMISSION_OF_NERVE_IMPULSE			SYNAPTIC_TRANSMISSION								CELL_CELL_SIGNALING
PYY	peptide YY		BEHAVIOR																																					CELL_CELL_SIGNALING
PTGDS	prostaglandin D2 synthase 21kDa (brain)		BEHAVIOR																																									CIRCADIAN_RHYTHM
FYN	FYN oncogene related to SRC, FGR, YES		BEHAVIOR																																										LEARNING_AND_OR_MEMORY
S100B	S100 calcium binding protein B		BEHAVIOR																																										LEARNING_AND_OR_MEMORY
VLDLR	very low density lipoprotein receptor		BEHAVIOR																																										LEARNING_AND_OR_MEMORY
CRHBP	corticotropin releasing hormone binding protein		BEHAVIOR																																										LEARNING_AND_OR_MEMORY
HTR1A	5-hydroxytryptamine (serotonin) receptor 1A		BEHAVIOR
GCG	glucagon		BEHAVIOR
DRD3	dopamine receptor D3		BEHAVIOR
ABAT	4-aminobutyrate aminotransferase		BEHAVIOR
TRPV1	transient receptor potential cation channel, subfamily V, member 1		BEHAVIOR
MAOA	monoamine oxidase A		BEHAVIOR
CD40LG	CD40 ligand (TNF superfamily, member 5, hyper-IgM syndrome)			REGULATION_OF_BIOLOGICAL_QUALITY	NEGATIVE_REGULATION_OF_APOPTOSIS	NEGATIVE_REGULATION_OF_DEVELOPMENTAL_PROCESS	RESPONSE_TO_WOUNDING	NEGATIVE_REGULATION_OF_PROGRAMMED_CELL_DEATH	RESPONSE_TO_EXTERNAL_STIMULUS								ANTI_APOPTOSIS	REGULATION_OF_APOPTOSIS		REGULATION_OF_PROGRAMMED_CELL_DEATH		APOPTOSIS_GO	PROGRAMMED_CELL_DEATH	INFLAMMATORY_RESPONSE																	HEMOSTASIS	BLOOD_COAGULATION							WOUND_HEALING
PROC	protein C (inactivator of coagulation factors Va and VIIIa)			REGULATION_OF_BIOLOGICAL_QUALITY	NEGATIVE_REGULATION_OF_APOPTOSIS	NEGATIVE_REGULATION_OF_DEVELOPMENTAL_PROCESS	RESPONSE_TO_WOUNDING	NEGATIVE_REGULATION_OF_PROGRAMMED_CELL_DEATH	RESPONSE_TO_EXTERNAL_STIMULUS									REGULATION_OF_APOPTOSIS		REGULATION_OF_PROGRAMMED_CELL_DEATH		APOPTOSIS_GO	PROGRAMMED_CELL_DEATH																		HEMOSTASIS	BLOOD_COAGULATION							WOUND_HEALING
GPX1	glutathione peroxidase 1			REGULATION_OF_BIOLOGICAL_QUALITY	NEGATIVE_REGULATION_OF_APOPTOSIS	NEGATIVE_REGULATION_OF_DEVELOPMENTAL_PROCESS		NEGATIVE_REGULATION_OF_PROGRAMMED_CELL_DEATH		HOMEOSTATIC_PROCESS							ANTI_APOPTOSIS	REGULATION_OF_APOPTOSIS		REGULATION_OF_PROGRAMMED_CELL_DEATH	CELLULAR_HOMEOSTASIS	APOPTOSIS_GO	PROGRAMMED_CELL_DEATH
GCLC	glutamate-cysteine ligase, catalytic subunit			REGULATION_OF_BIOLOGICAL_QUALITY	NEGATIVE_REGULATION_OF_APOPTOSIS	NEGATIVE_REGULATION_OF_DEVELOPMENTAL_PROCESS		NEGATIVE_REGULATION_OF_PROGRAMMED_CELL_DEATH		HOMEOSTATIC_PROCESS							ANTI_APOPTOSIS	REGULATION_OF_APOPTOSIS		REGULATION_OF_PROGRAMMED_CELL_DEATH	CELLULAR_HOMEOSTASIS	APOPTOSIS_GO	PROGRAMMED_CELL_DEATH
IL7	interleukin 7			REGULATION_OF_BIOLOGICAL_QUALITY	NEGATIVE_REGULATION_OF_APOPTOSIS	NEGATIVE_REGULATION_OF_DEVELOPMENTAL_PROCESS		NEGATIVE_REGULATION_OF_PROGRAMMED_CELL_DEATH		HOMEOSTATIC_PROCESS								REGULATION_OF_APOPTOSIS		REGULATION_OF_PROGRAMMED_CELL_DEATH		APOPTOSIS_GO	PROGRAMMED_CELL_DEATH																	CELL_CELL_SIGNALING
IL6	interleukin 6 (interferon, beta 2)			REGULATION_OF_BIOLOGICAL_QUALITY	NEGATIVE_REGULATION_OF_APOPTOSIS	NEGATIVE_REGULATION_OF_DEVELOPMENTAL_PROCESS		NEGATIVE_REGULATION_OF_PROGRAMMED_CELL_DEATH		HOMEOSTATIC_PROCESS								REGULATION_OF_APOPTOSIS		REGULATION_OF_PROGRAMMED_CELL_DEATH		APOPTOSIS_GO	PROGRAMMED_CELL_DEATH
GDNF	glial cell derived neurotrophic factor			REGULATION_OF_BIOLOGICAL_QUALITY	NEGATIVE_REGULATION_OF_APOPTOSIS	NEGATIVE_REGULATION_OF_DEVELOPMENTAL_PROCESS		NEGATIVE_REGULATION_OF_PROGRAMMED_CELL_DEATH									ANTI_APOPTOSIS	REGULATION_OF_APOPTOSIS		REGULATION_OF_PROGRAMMED_CELL_DEATH		APOPTOSIS_GO	PROGRAMMED_CELL_DEATH				REGULATION_OF_NEURON_APOPTOSIS		TRANSMISSION_OF_NERVE_IMPULSE			SYNAPTIC_TRANSMISSION		NEURON_APOPTOSIS		REGULATION_OF_NEUROTRANSMITTER_LEVELS				CELL_CELL_SIGNALING
IL2	interleukin 2			REGULATION_OF_BIOLOGICAL_QUALITY	NEGATIVE_REGULATION_OF_APOPTOSIS	NEGATIVE_REGULATION_OF_DEVELOPMENTAL_PROCESS		NEGATIVE_REGULATION_OF_PROGRAMMED_CELL_DEATH									ANTI_APOPTOSIS	REGULATION_OF_APOPTOSIS		REGULATION_OF_PROGRAMMED_CELL_DEATH		APOPTOSIS_GO	PROGRAMMED_CELL_DEATH																	CELL_CELL_SIGNALING
ALOX12	arachidonate 12-lipoxygenase			REGULATION_OF_BIOLOGICAL_QUALITY	NEGATIVE_REGULATION_OF_APOPTOSIS	NEGATIVE_REGULATION_OF_DEVELOPMENTAL_PROCESS		NEGATIVE_REGULATION_OF_PROGRAMMED_CELL_DEATH									ANTI_APOPTOSIS	REGULATION_OF_APOPTOSIS		REGULATION_OF_PROGRAMMED_CELL_DEATH		APOPTOSIS_GO	PROGRAMMED_CELL_DEATH
PLG	plasminogen			REGULATION_OF_BIOLOGICAL_QUALITY		NEGATIVE_REGULATION_OF_DEVELOPMENTAL_PROCESS	RESPONSE_TO_WOUNDING		RESPONSE_TO_EXTERNAL_STIMULUS									REGULATION_OF_APOPTOSIS		REGULATION_OF_PROGRAMMED_CELL_DEATH		APOPTOSIS_GO	PROGRAMMED_CELL_DEATH																		HEMOSTASIS	BLOOD_COAGULATION							WOUND_HEALING
IQCB1	IQ motif containing B1			REGULATION_OF_BIOLOGICAL_QUALITY		NEGATIVE_REGULATION_OF_DEVELOPMENTAL_PROCESS				HOMEOSTATIC_PROCESS											CELLULAR_HOMEOSTASIS
PML	promyelocytic leukemia			REGULATION_OF_BIOLOGICAL_QUALITY		NEGATIVE_REGULATION_OF_DEVELOPMENTAL_PROCESS												REGULATION_OF_APOPTOSIS		REGULATION_OF_PROGRAMMED_CELL_DEATH		APOPTOSIS_GO	PROGRAMMED_CELL_DEATH		RESPONSE_TO_HYPOXIA
YWHAH	tyrosine 3-monooxygenase/tryptophan 5-monooxygenase activation protein, eta polypeptide			REGULATION_OF_BIOLOGICAL_QUALITY		NEGATIVE_REGULATION_OF_DEVELOPMENTAL_PROCESS																							TRANSMISSION_OF_NERVE_IMPULSE			SYNAPTIC_TRANSMISSION								CELL_CELL_SIGNALING
TGFB1	transforming growth factor, beta 1 (Camurati-Engelmann disease)			REGULATION_OF_BIOLOGICAL_QUALITY			RESPONSE_TO_WOUNDING		RESPONSE_TO_EXTERNAL_STIMULUS									REGULATION_OF_APOPTOSIS		REGULATION_OF_PROGRAMMED_CELL_DEATH		APOPTOSIS_GO	PROGRAMMED_CELL_DEATH	INFLAMMATORY_RESPONSE
F2	coagulation factor II (thrombin)			REGULATION_OF_BIOLOGICAL_QUALITY			RESPONSE_TO_WOUNDING		RESPONSE_TO_EXTERNAL_STIMULUS									REGULATION_OF_APOPTOSIS		REGULATION_OF_PROGRAMMED_CELL_DEATH		APOPTOSIS_GO	PROGRAMMED_CELL_DEATH												POSITIVE_REGULATION_OF_CATALYTIC_ACTIVITY						HEMOSTASIS	BLOOD_COAGULATION							WOUND_HEALING
F2R	coagulation factor II (thrombin) receptor			REGULATION_OF_BIOLOGICAL_QUALITY			RESPONSE_TO_WOUNDING		RESPONSE_TO_EXTERNAL_STIMULUS									REGULATION_OF_APOPTOSIS		REGULATION_OF_PROGRAMMED_CELL_DEATH		APOPTOSIS_GO	PROGRAMMED_CELL_DEATH												POSITIVE_REGULATION_OF_CATALYTIC_ACTIVITY						HEMOSTASIS	BLOOD_COAGULATION							WOUND_HEALING
ADORA2A	adenosine A2a receptor			REGULATION_OF_BIOLOGICAL_QUALITY			RESPONSE_TO_WOUNDING		RESPONSE_TO_EXTERNAL_STIMULUS													APOPTOSIS_GO	PROGRAMMED_CELL_DEATH	INFLAMMATORY_RESPONSE																CELL_CELL_SIGNALING	HEMOSTASIS	BLOOD_COAGULATION							WOUND_HEALING
SERPINE1	serpin peptidase inhibitor, clade E (nexin, plasminogen activator inhibitor type 1), member 1			REGULATION_OF_BIOLOGICAL_QUALITY			RESPONSE_TO_WOUNDING		RESPONSE_TO_EXTERNAL_STIMULUS																																HEMOSTASIS	BLOOD_COAGULATION							WOUND_HEALING
PLAT	plasminogen activator, tissue			REGULATION_OF_BIOLOGICAL_QUALITY			RESPONSE_TO_WOUNDING		RESPONSE_TO_EXTERNAL_STIMULUS																																HEMOSTASIS	BLOOD_COAGULATION							WOUND_HEALING
VWF	von Willebrand factor			REGULATION_OF_BIOLOGICAL_QUALITY			RESPONSE_TO_WOUNDING		RESPONSE_TO_EXTERNAL_STIMULUS																																HEMOSTASIS	BLOOD_COAGULATION							WOUND_HEALING
CD59	CD59 molecule, complement regulatory protein			REGULATION_OF_BIOLOGICAL_QUALITY			RESPONSE_TO_WOUNDING		RESPONSE_TO_EXTERNAL_STIMULUS																																HEMOSTASIS	BLOOD_COAGULATION							WOUND_HEALING
LMAN1	lectin, mannose-binding, 1			REGULATION_OF_BIOLOGICAL_QUALITY			RESPONSE_TO_WOUNDING		RESPONSE_TO_EXTERNAL_STIMULUS																																HEMOSTASIS	BLOOD_COAGULATION							WOUND_HEALING
CD36	CD36 molecule (thrombospondin receptor)			REGULATION_OF_BIOLOGICAL_QUALITY			RESPONSE_TO_WOUNDING		RESPONSE_TO_EXTERNAL_STIMULUS																																HEMOSTASIS	BLOOD_COAGULATION							WOUND_HEALING
F13A1	coagulation factor XIII, A1 polypeptide			REGULATION_OF_BIOLOGICAL_QUALITY			RESPONSE_TO_WOUNDING		RESPONSE_TO_EXTERNAL_STIMULUS																																HEMOSTASIS	BLOOD_COAGULATION							WOUND_HEALING
F5	coagulation factor V (proaccelerin, labile factor)			REGULATION_OF_BIOLOGICAL_QUALITY			RESPONSE_TO_WOUNDING		RESPONSE_TO_EXTERNAL_STIMULUS																																HEMOSTASIS	BLOOD_COAGULATION							WOUND_HEALING
F7	coagulation factor VII (serum prothrombin conversion accelerator)			REGULATION_OF_BIOLOGICAL_QUALITY			RESPONSE_TO_WOUNDING		RESPONSE_TO_EXTERNAL_STIMULUS																																HEMOSTASIS	BLOOD_COAGULATION							WOUND_HEALING
F8	coagulation factor VIII, procoagulant component (hemophilia A)			REGULATION_OF_BIOLOGICAL_QUALITY			RESPONSE_TO_WOUNDING		RESPONSE_TO_EXTERNAL_STIMULUS																																HEMOSTASIS	BLOOD_COAGULATION							WOUND_HEALING
ITGB3	integrin, beta 3 (platelet glycoprotein IIIa, antigen CD61)			REGULATION_OF_BIOLOGICAL_QUALITY			RESPONSE_TO_WOUNDING		RESPONSE_TO_EXTERNAL_STIMULUS																																HEMOSTASIS	BLOOD_COAGULATION							WOUND_HEALING
MMRN1	multimerin 1			REGULATION_OF_BIOLOGICAL_QUALITY			RESPONSE_TO_WOUNDING		RESPONSE_TO_EXTERNAL_STIMULUS																																HEMOSTASIS	BLOOD_COAGULATION							WOUND_HEALING
TFPI	tissue factor pathway inhibitor (lipoprotein-associated coagulation inhibitor)			REGULATION_OF_BIOLOGICAL_QUALITY			RESPONSE_TO_WOUNDING		RESPONSE_TO_EXTERNAL_STIMULUS																																HEMOSTASIS	BLOOD_COAGULATION							WOUND_HEALING
THBD	thrombomodulin			REGULATION_OF_BIOLOGICAL_QUALITY			RESPONSE_TO_WOUNDING		RESPONSE_TO_EXTERNAL_STIMULUS																																HEMOSTASIS	BLOOD_COAGULATION							WOUND_HEALING
TP53	tumor protein p53 (Li-Fraumeni syndrome)			REGULATION_OF_BIOLOGICAL_QUALITY					RESPONSE_TO_EXTERNAL_STIMULUS									REGULATION_OF_APOPTOSIS		REGULATION_OF_PROGRAMMED_CELL_DEATH		APOPTOSIS_GO	PROGRAMMED_CELL_DEATH										CELLULAR_RESPONSE_TO_STIMULUS		POSITIVE_REGULATION_OF_CATALYTIC_ACTIVITY
CDKN1A	cyclin-dependent kinase inhibitor 1A (p21, Cip1)			REGULATION_OF_BIOLOGICAL_QUALITY					RESPONSE_TO_EXTERNAL_STIMULUS									REGULATION_OF_APOPTOSIS		REGULATION_OF_PROGRAMMED_CELL_DEATH		APOPTOSIS_GO	PROGRAMMED_CELL_DEATH										CELLULAR_RESPONSE_TO_STIMULUS
PPP1R9B	protein phosphatase 1, regulatory subunit 9B, spinophilin			REGULATION_OF_BIOLOGICAL_QUALITY					RESPONSE_TO_EXTERNAL_STIMULUS																								CELLULAR_RESPONSE_TO_STIMULUS
CEBPG	CCAAT/enhancer binding protein (C/EBP), gamma			REGULATION_OF_BIOLOGICAL_QUALITY						HOMEOSTATIC_PROCESS								REGULATION_OF_APOPTOSIS		REGULATION_OF_PROGRAMMED_CELL_DEATH		APOPTOSIS_GO	PROGRAMMED_CELL_DEATH
DDIT3	DNA-damage-inducible transcript 3			REGULATION_OF_BIOLOGICAL_QUALITY						HOMEOSTATIC_PROCESS											CELLULAR_HOMEOSTASIS
USH1G	Usher syndrome 1G (autosomal recessive)			REGULATION_OF_BIOLOGICAL_QUALITY						HOMEOSTATIC_PROCESS											CELLULAR_HOMEOSTASIS
EP300	E1A binding protein p300			REGULATION_OF_BIOLOGICAL_QUALITY						HOMEOSTATIC_PROCESS												APOPTOSIS_GO	PROGRAMMED_CELL_DEATH		RESPONSE_TO_HYPOXIA
AKT1	v-akt murine thymoma viral oncogene homolog 1			REGULATION_OF_BIOLOGICAL_QUALITY						HOMEOSTATIC_PROCESS												APOPTOSIS_GO	PROGRAMMED_CELL_DEATH
LYN	v-yes-1 Yamaguchi sarcoma viral related oncogene homolog			REGULATION_OF_BIOLOGICAL_QUALITY						HOMEOSTATIC_PROCESS
PPARGC1A	peroxisome proliferative activated receptor, gamma, coactivator 1, alpha			REGULATION_OF_BIOLOGICAL_QUALITY						HOMEOSTATIC_PROCESS
TPP1	tripeptidyl peptidase I			REGULATION_OF_BIOLOGICAL_QUALITY						HOMEOSTATIC_PROCESS
GRM4	glutamate receptor, metabotropic 4			REGULATION_OF_BIOLOGICAL_QUALITY												G_PROTEIN_SIGNALING_COUPLED_TO_CYCLIC_NUCLEOTIDE_SECOND_MESSENGER		REGULATION_OF_APOPTOSIS	CYCLIC_NUCLEOTIDE_MEDIATED_SIGNALING	REGULATION_OF_PROGRAMMED_CELL_DEATH		APOPTOSIS_GO	PROGRAMMED_CELL_DEATH				REGULATION_OF_NEURON_APOPTOSIS	G_PROTEIN_SIGNALING_COUPLED_TO_CAMP_NUCLEOTIDE_SECOND_MESSENGER	TRANSMISSION_OF_NERVE_IMPULSE		CAMP_MEDIATED_SIGNALING	SYNAPTIC_TRANSMISSION		NEURON_APOPTOSIS	POSITIVE_REGULATION_OF_CATALYTIC_ACTIVITY	REGULATION_OF_NEUROTRANSMITTER_LEVELS	SECOND_MESSENGER_MEDIATED_SIGNALING			CELL_CELL_SIGNALING
AVPR2	arginine vasopressin receptor 2 (nephrogenic diabetes insipidus)			REGULATION_OF_BIOLOGICAL_QUALITY												G_PROTEIN_SIGNALING_COUPLED_TO_CYCLIC_NUCLEOTIDE_SECOND_MESSENGER			CYCLIC_NUCLEOTIDE_MEDIATED_SIGNALING									G_PROTEIN_SIGNALING_COUPLED_TO_CAMP_NUCLEOTIDE_SECOND_MESSENGER		G_PROTEIN_SIGNALING_ADENYLATE_CYCLASE_ACTIVATING_PATHWAY	CAMP_MEDIATED_SIGNALING				POSITIVE_REGULATION_OF_CATALYTIC_ACTIVITY		SECOND_MESSENGER_MEDIATED_SIGNALING				HEMOSTASIS
HRH3	histamine receptor H3			REGULATION_OF_BIOLOGICAL_QUALITY												G_PROTEIN_SIGNALING_COUPLED_TO_CYCLIC_NUCLEOTIDE_SECOND_MESSENGER			CYCLIC_NUCLEOTIDE_MEDIATED_SIGNALING										TRANSMISSION_OF_NERVE_IMPULSE			SYNAPTIC_TRANSMISSION				REGULATION_OF_NEUROTRANSMITTER_LEVELS	SECOND_MESSENGER_MEDIATED_SIGNALING			CELL_CELL_SIGNALING
SMAD3	SMAD, mothers against DPP homolog 3 (Drosophila)			REGULATION_OF_BIOLOGICAL_QUALITY														REGULATION_OF_APOPTOSIS		REGULATION_OF_PROGRAMMED_CELL_DEATH		APOPTOSIS_GO	PROGRAMMED_CELL_DEATH		RESPONSE_TO_HYPOXIA										POSITIVE_REGULATION_OF_CATALYTIC_ACTIVITY
PTEN	phosphatase and tensin homolog (mutated in multiple advanced cancers 1)			REGULATION_OF_BIOLOGICAL_QUALITY														REGULATION_OF_APOPTOSIS		REGULATION_OF_PROGRAMMED_CELL_DEATH		APOPTOSIS_GO	PROGRAMMED_CELL_DEATH
CDKN1B	cyclin-dependent kinase inhibitor 1B (p27, Kip1)			REGULATION_OF_BIOLOGICAL_QUALITY														REGULATION_OF_APOPTOSIS		REGULATION_OF_PROGRAMMED_CELL_DEATH		APOPTOSIS_GO	PROGRAMMED_CELL_DEATH
PPARD	peroxisome proliferative activated receptor, delta			REGULATION_OF_BIOLOGICAL_QUALITY																		APOPTOSIS_GO	PROGRAMMED_CELL_DEATH						TRANSMISSION_OF_NERVE_IMPULSE											CELL_CELL_SIGNALING			LIPID_TRANSPORT
SMAD4	SMAD, mothers against DPP homolog 4 (Drosophila)			REGULATION_OF_BIOLOGICAL_QUALITY																					RESPONSE_TO_HYPOXIA
SNCAIP	synuclein, alpha interacting protein (synphilin)			REGULATION_OF_BIOLOGICAL_QUALITY																									TRANSMISSION_OF_NERVE_IMPULSE			SYNAPTIC_TRANSMISSION				REGULATION_OF_NEUROTRANSMITTER_LEVELS				CELL_CELL_SIGNALING
2011-09-05	septin 5			REGULATION_OF_BIOLOGICAL_QUALITY																									TRANSMISSION_OF_NERVE_IMPULSE			SYNAPTIC_TRANSMISSION				REGULATION_OF_NEUROTRANSMITTER_LEVELS				CELL_CELL_SIGNALING
RAB3A	RAB3A, member RAS oncogene family			REGULATION_OF_BIOLOGICAL_QUALITY																									TRANSMISSION_OF_NERVE_IMPULSE			SYNAPTIC_TRANSMISSION				REGULATION_OF_NEUROTRANSMITTER_LEVELS				CELL_CELL_SIGNALING
SLC5A7	solute carrier family 5 (choline transporter), member 7			REGULATION_OF_BIOLOGICAL_QUALITY																									TRANSMISSION_OF_NERVE_IMPULSE			SYNAPTIC_TRANSMISSION				REGULATION_OF_NEUROTRANSMITTER_LEVELS				CELL_CELL_SIGNALING
GCH1	GTP cyclohydrolase 1 (dopa-responsive dystonia)			REGULATION_OF_BIOLOGICAL_QUALITY																									TRANSMISSION_OF_NERVE_IMPULSE			SYNAPTIC_TRANSMISSION				REGULATION_OF_NEUROTRANSMITTER_LEVELS				CELL_CELL_SIGNALING
COLQ	collagen-like tail subunit (single strand of homotrimer) of asymmetric acetylcholinesterase			REGULATION_OF_BIOLOGICAL_QUALITY																									TRANSMISSION_OF_NERVE_IMPULSE			SYNAPTIC_TRANSMISSION				REGULATION_OF_NEUROTRANSMITTER_LEVELS				CELL_CELL_SIGNALING
SLC1A3	solute carrier family 1 (glial high affinity glutamate transporter), member 3			REGULATION_OF_BIOLOGICAL_QUALITY																									TRANSMISSION_OF_NERVE_IMPULSE			SYNAPTIC_TRANSMISSION				REGULATION_OF_NEUROTRANSMITTER_LEVELS				CELL_CELL_SIGNALING
SLC6A4	solute carrier family 6 (neurotransmitter transporter, serotonin), member 4			REGULATION_OF_BIOLOGICAL_QUALITY																									TRANSMISSION_OF_NERVE_IMPULSE			SYNAPTIC_TRANSMISSION				REGULATION_OF_NEUROTRANSMITTER_LEVELS				CELL_CELL_SIGNALING
ALDH9A1	aldehyde dehydrogenase 9 family, member A1			REGULATION_OF_BIOLOGICAL_QUALITY																									TRANSMISSION_OF_NERVE_IMPULSE			SYNAPTIC_TRANSMISSION				REGULATION_OF_NEUROTRANSMITTER_LEVELS				CELL_CELL_SIGNALING
UTS2	urotensin 2			REGULATION_OF_BIOLOGICAL_QUALITY																									TRANSMISSION_OF_NERVE_IMPULSE			SYNAPTIC_TRANSMISSION							REGULATION_OF_BLOOD_PRESSURE	CELL_CELL_SIGNALING
YWHAG	tyrosine 3-monooxygenase/tryptophan 5-monooxygenase activation protein, gamma polypeptide			REGULATION_OF_BIOLOGICAL_QUALITY																									TRANSMISSION_OF_NERVE_IMPULSE			SYNAPTIC_TRANSMISSION								CELL_CELL_SIGNALING
MBP	myelin basic protein			REGULATION_OF_BIOLOGICAL_QUALITY																									TRANSMISSION_OF_NERVE_IMPULSE			SYNAPTIC_TRANSMISSION								CELL_CELL_SIGNALING
PLP1	proteolipid protein 1 (Pelizaeus-Merzbacher disease, spastic paraplegia 2, uncomplicated)			REGULATION_OF_BIOLOGICAL_QUALITY																									TRANSMISSION_OF_NERVE_IMPULSE			SYNAPTIC_TRANSMISSION								CELL_CELL_SIGNALING
EIF2B5	eukaryotic translation initiation factor 2B, subunit 5 epsilon, 82kDa			REGULATION_OF_BIOLOGICAL_QUALITY																									TRANSMISSION_OF_NERVE_IMPULSE				CELLULAR_RESPONSE_TO_STIMULUS							CELL_CELL_SIGNALING
EIF2B2	eukaryotic translation initiation factor 2B, subunit 2 beta, 39kDa			REGULATION_OF_BIOLOGICAL_QUALITY																									TRANSMISSION_OF_NERVE_IMPULSE				CELLULAR_RESPONSE_TO_STIMULUS							CELL_CELL_SIGNALING
ALS2	amyotrophic lateral sclerosis 2 (juvenile)			REGULATION_OF_BIOLOGICAL_QUALITY																															POSITIVE_REGULATION_OF_CATALYTIC_ACTIVITY
AGT	angiotensinogen (serpin peptidase inhibitor, clade A, member 8)			REGULATION_OF_BIOLOGICAL_QUALITY																																			REGULATION_OF_BLOOD_PRESSURE	CELL_CELL_SIGNALING
REN	renin			REGULATION_OF_BIOLOGICAL_QUALITY																																			REGULATION_OF_BLOOD_PRESSURE
ACE	angiotensin I converting enzyme (peptidyl-dipeptidase A) 1			REGULATION_OF_BIOLOGICAL_QUALITY																																			REGULATION_OF_BLOOD_PRESSURE
PTGS1	prostaglandin-endoperoxide synthase 1 (prostaglandin G/H synthase and cyclooxygenase)			REGULATION_OF_BIOLOGICAL_QUALITY																																			REGULATION_OF_BLOOD_PRESSURE
CHGA	chromogranin A (parathyroid secretory protein 1)			REGULATION_OF_BIOLOGICAL_QUALITY																																			REGULATION_OF_BLOOD_PRESSURE
NPPA	natriuretic peptide precursor A			REGULATION_OF_BIOLOGICAL_QUALITY																																			REGULATION_OF_BLOOD_PRESSURE
PTGS2	prostaglandin-endoperoxide synthase 2 (prostaglandin G/H synthase and cyclooxygenase)			REGULATION_OF_BIOLOGICAL_QUALITY																																			REGULATION_OF_BLOOD_PRESSURE
RENBP	renin binding protein			REGULATION_OF_BIOLOGICAL_QUALITY																																			REGULATION_OF_BLOOD_PRESSURE
GPI	glucose phosphate isomerase			REGULATION_OF_BIOLOGICAL_QUALITY																																					HEMOSTASIS
VIP	vasoactive intestinal peptide			REGULATION_OF_BIOLOGICAL_QUALITY
APBB1	amyloid beta (A4) precursor protein-binding, family B, member 1 (Fe65)			REGULATION_OF_BIOLOGICAL_QUALITY
GSN	gelsolin (amyloidosis, Finnish type)			REGULATION_OF_BIOLOGICAL_QUALITY
GCLM	glutamate-cysteine ligase, modifier subunit			REGULATION_OF_BIOLOGICAL_QUALITY
APTX	aprataxin			REGULATION_OF_BIOLOGICAL_QUALITY
RB1	retinoblastoma 1 (including osteosarcoma)			REGULATION_OF_BIOLOGICAL_QUALITY
ENO1	enolase 1, (alpha)			REGULATION_OF_BIOLOGICAL_QUALITY
KEL	Kell blood group, metallo-endopeptidase			REGULATION_OF_BIOLOGICAL_QUALITY
FBXO7	F-box protein 7			REGULATION_OF_BIOLOGICAL_QUALITY
RELA	v-rel reticuloendotheliosis viral oncogene homolog A, nuclear factor of kappa light polypeptide gene enhancer in B-cells 3, p65 (avian)				NEGATIVE_REGULATION_OF_APOPTOSIS	NEGATIVE_REGULATION_OF_DEVELOPMENTAL_PROCESS	RESPONSE_TO_WOUNDING	NEGATIVE_REGULATION_OF_PROGRAMMED_CELL_DEATH	RESPONSE_TO_EXTERNAL_STIMULUS								ANTI_APOPTOSIS	REGULATION_OF_APOPTOSIS		REGULATION_OF_PROGRAMMED_CELL_DEATH		APOPTOSIS_GO	PROGRAMMED_CELL_DEATH	INFLAMMATORY_RESPONSE
IL1A	interleukin 1, alpha				NEGATIVE_REGULATION_OF_APOPTOSIS	NEGATIVE_REGULATION_OF_DEVELOPMENTAL_PROCESS	RESPONSE_TO_WOUNDING	NEGATIVE_REGULATION_OF_PROGRAMMED_CELL_DEATH	RESPONSE_TO_EXTERNAL_STIMULUS								ANTI_APOPTOSIS	REGULATION_OF_APOPTOSIS		REGULATION_OF_PROGRAMMED_CELL_DEATH		APOPTOSIS_GO	PROGRAMMED_CELL_DEATH	INFLAMMATORY_RESPONSE
NFKB1	nuclear factor of kappa light polypeptide gene enhancer in B-cells 1 (p105)				NEGATIVE_REGULATION_OF_APOPTOSIS	NEGATIVE_REGULATION_OF_DEVELOPMENTAL_PROCESS	RESPONSE_TO_WOUNDING	NEGATIVE_REGULATION_OF_PROGRAMMED_CELL_DEATH	RESPONSE_TO_EXTERNAL_STIMULUS								ANTI_APOPTOSIS	REGULATION_OF_APOPTOSIS		REGULATION_OF_PROGRAMMED_CELL_DEATH		APOPTOSIS_GO	PROGRAMMED_CELL_DEATH	INFLAMMATORY_RESPONSE
ALB	albumin				NEGATIVE_REGULATION_OF_APOPTOSIS	NEGATIVE_REGULATION_OF_DEVELOPMENTAL_PROCESS		NEGATIVE_REGULATION_OF_PROGRAMMED_CELL_DEATH	RESPONSE_TO_EXTERNAL_STIMULUS									REGULATION_OF_APOPTOSIS		REGULATION_OF_PROGRAMMED_CELL_DEATH		APOPTOSIS_GO	PROGRAMMED_CELL_DEATH										CELLULAR_RESPONSE_TO_STIMULUS
HSP90B1	heat shock protein 90kDa beta (Grp94), member 1				NEGATIVE_REGULATION_OF_APOPTOSIS	NEGATIVE_REGULATION_OF_DEVELOPMENTAL_PROCESS		NEGATIVE_REGULATION_OF_PROGRAMMED_CELL_DEATH									ANTI_APOPTOSIS	REGULATION_OF_APOPTOSIS		REGULATION_OF_PROGRAMMED_CELL_DEATH		APOPTOSIS_GO	PROGRAMMED_CELL_DEATH		RESPONSE_TO_HYPOXIA
PSEN1	presenilin 1 (Alzheimer disease 3)				NEGATIVE_REGULATION_OF_APOPTOSIS	NEGATIVE_REGULATION_OF_DEVELOPMENTAL_PROCESS		NEGATIVE_REGULATION_OF_PROGRAMMED_CELL_DEATH									ANTI_APOPTOSIS	REGULATION_OF_APOPTOSIS		REGULATION_OF_PROGRAMMED_CELL_DEATH		APOPTOSIS_GO	PROGRAMMED_CELL_DEATH			AMYLOID_PRECURSOR_PROTEIN_METABOLIC_PROCESS									POSITIVE_REGULATION_OF_CATALYTIC_ACTIVITY												GLYCOPROTEIN_CATABOLIC_PROCESS
IL3	interleukin 3 (colony-stimulating factor, multiple)				NEGATIVE_REGULATION_OF_APOPTOSIS	NEGATIVE_REGULATION_OF_DEVELOPMENTAL_PROCESS		NEGATIVE_REGULATION_OF_PROGRAMMED_CELL_DEATH									ANTI_APOPTOSIS	REGULATION_OF_APOPTOSIS		REGULATION_OF_PROGRAMMED_CELL_DEATH		APOPTOSIS_GO	PROGRAMMED_CELL_DEATH																	CELL_CELL_SIGNALING
SOCS3	suppressor of cytokine signaling 3				NEGATIVE_REGULATION_OF_APOPTOSIS	NEGATIVE_REGULATION_OF_DEVELOPMENTAL_PROCESS		NEGATIVE_REGULATION_OF_PROGRAMMED_CELL_DEATH									ANTI_APOPTOSIS	REGULATION_OF_APOPTOSIS		REGULATION_OF_PROGRAMMED_CELL_DEATH		APOPTOSIS_GO	PROGRAMMED_CELL_DEATH
RTN4	reticulon 4				NEGATIVE_REGULATION_OF_APOPTOSIS	NEGATIVE_REGULATION_OF_DEVELOPMENTAL_PROCESS		NEGATIVE_REGULATION_OF_PROGRAMMED_CELL_DEATH									ANTI_APOPTOSIS	REGULATION_OF_APOPTOSIS		REGULATION_OF_PROGRAMMED_CELL_DEATH		APOPTOSIS_GO	PROGRAMMED_CELL_DEATH
CD28	CD28 molecule				NEGATIVE_REGULATION_OF_APOPTOSIS	NEGATIVE_REGULATION_OF_DEVELOPMENTAL_PROCESS		NEGATIVE_REGULATION_OF_PROGRAMMED_CELL_DEATH									ANTI_APOPTOSIS	REGULATION_OF_APOPTOSIS		REGULATION_OF_PROGRAMMED_CELL_DEATH		APOPTOSIS_GO	PROGRAMMED_CELL_DEATH
IGF1R	insulin-like growth factor 1 receptor				NEGATIVE_REGULATION_OF_APOPTOSIS	NEGATIVE_REGULATION_OF_DEVELOPMENTAL_PROCESS		NEGATIVE_REGULATION_OF_PROGRAMMED_CELL_DEATH									ANTI_APOPTOSIS	REGULATION_OF_APOPTOSIS		REGULATION_OF_PROGRAMMED_CELL_DEATH		APOPTOSIS_GO	PROGRAMMED_CELL_DEATH
DHCR24	24-dehydrocholesterol reductase				NEGATIVE_REGULATION_OF_APOPTOSIS	NEGATIVE_REGULATION_OF_DEVELOPMENTAL_PROCESS		NEGATIVE_REGULATION_OF_PROGRAMMED_CELL_DEATH									ANTI_APOPTOSIS	REGULATION_OF_APOPTOSIS		REGULATION_OF_PROGRAMMED_CELL_DEATH		APOPTOSIS_GO	PROGRAMMED_CELL_DEATH
HBXIP	hepatitis B virus x interacting protein				NEGATIVE_REGULATION_OF_APOPTOSIS	NEGATIVE_REGULATION_OF_DEVELOPMENTAL_PROCESS		NEGATIVE_REGULATION_OF_PROGRAMMED_CELL_DEATH									ANTI_APOPTOSIS	REGULATION_OF_APOPTOSIS		REGULATION_OF_PROGRAMMED_CELL_DEATH		APOPTOSIS_GO	PROGRAMMED_CELL_DEATH
NPM1	nucleophosmin (nucleolar phosphoprotein B23, numatrin)				NEGATIVE_REGULATION_OF_APOPTOSIS	NEGATIVE_REGULATION_OF_DEVELOPMENTAL_PROCESS		NEGATIVE_REGULATION_OF_PROGRAMMED_CELL_DEATH									ANTI_APOPTOSIS	REGULATION_OF_APOPTOSIS		REGULATION_OF_PROGRAMMED_CELL_DEATH		APOPTOSIS_GO	PROGRAMMED_CELL_DEATH
HMGB1	high-mobility group box 1				NEGATIVE_REGULATION_OF_APOPTOSIS	NEGATIVE_REGULATION_OF_DEVELOPMENTAL_PROCESS		NEGATIVE_REGULATION_OF_PROGRAMMED_CELL_DEATH									ANTI_APOPTOSIS	REGULATION_OF_APOPTOSIS		REGULATION_OF_PROGRAMMED_CELL_DEATH		APOPTOSIS_GO	PROGRAMMED_CELL_DEATH
MPO	myeloperoxidase				NEGATIVE_REGULATION_OF_APOPTOSIS	NEGATIVE_REGULATION_OF_DEVELOPMENTAL_PROCESS		NEGATIVE_REGULATION_OF_PROGRAMMED_CELL_DEATH									ANTI_APOPTOSIS	REGULATION_OF_APOPTOSIS		REGULATION_OF_PROGRAMMED_CELL_DEATH		APOPTOSIS_GO	PROGRAMMED_CELL_DEATH
PRDX2	peroxiredoxin 2				NEGATIVE_REGULATION_OF_APOPTOSIS	NEGATIVE_REGULATION_OF_DEVELOPMENTAL_PROCESS		NEGATIVE_REGULATION_OF_PROGRAMMED_CELL_DEATH									ANTI_APOPTOSIS	REGULATION_OF_APOPTOSIS		REGULATION_OF_PROGRAMMED_CELL_DEATH		APOPTOSIS_GO	PROGRAMMED_CELL_DEATH
HSPB1	heat shock 27kDa protein 1				NEGATIVE_REGULATION_OF_APOPTOSIS	NEGATIVE_REGULATION_OF_DEVELOPMENTAL_PROCESS		NEGATIVE_REGULATION_OF_PROGRAMMED_CELL_DEATH									ANTI_APOPTOSIS	REGULATION_OF_APOPTOSIS		REGULATION_OF_PROGRAMMED_CELL_DEATH		APOPTOSIS_GO	PROGRAMMED_CELL_DEATH
TNF	tumor necrosis factor (TNF superfamily, member 2)				NEGATIVE_REGULATION_OF_APOPTOSIS	NEGATIVE_REGULATION_OF_DEVELOPMENTAL_PROCESS		NEGATIVE_REGULATION_OF_PROGRAMMED_CELL_DEATH									ANTI_APOPTOSIS	REGULATION_OF_APOPTOSIS		REGULATION_OF_PROGRAMMED_CELL_DEATH		APOPTOSIS_GO	PROGRAMMED_CELL_DEATH
BECN1	beclin 1 (coiled-coil, myosin-like BCL2 interacting protein)				NEGATIVE_REGULATION_OF_APOPTOSIS	NEGATIVE_REGULATION_OF_DEVELOPMENTAL_PROCESS		NEGATIVE_REGULATION_OF_PROGRAMMED_CELL_DEATH									ANTI_APOPTOSIS	REGULATION_OF_APOPTOSIS		REGULATION_OF_PROGRAMMED_CELL_DEATH		APOPTOSIS_GO	PROGRAMMED_CELL_DEATH
CRYAB	crystallin, alpha B				NEGATIVE_REGULATION_OF_APOPTOSIS	NEGATIVE_REGULATION_OF_DEVELOPMENTAL_PROCESS		NEGATIVE_REGULATION_OF_PROGRAMMED_CELL_DEATH									ANTI_APOPTOSIS	REGULATION_OF_APOPTOSIS		REGULATION_OF_PROGRAMMED_CELL_DEATH		APOPTOSIS_GO	PROGRAMMED_CELL_DEATH
IL2RB	interleukin 2 receptor, beta				NEGATIVE_REGULATION_OF_APOPTOSIS	NEGATIVE_REGULATION_OF_DEVELOPMENTAL_PROCESS		NEGATIVE_REGULATION_OF_PROGRAMMED_CELL_DEATH									ANTI_APOPTOSIS	REGULATION_OF_APOPTOSIS		REGULATION_OF_PROGRAMMED_CELL_DEATH		APOPTOSIS_GO	PROGRAMMED_CELL_DEATH
BAG1	BCL2-associated athanogene				NEGATIVE_REGULATION_OF_APOPTOSIS	NEGATIVE_REGULATION_OF_DEVELOPMENTAL_PROCESS		NEGATIVE_REGULATION_OF_PROGRAMMED_CELL_DEATH									ANTI_APOPTOSIS	REGULATION_OF_APOPTOSIS		REGULATION_OF_PROGRAMMED_CELL_DEATH		APOPTOSIS_GO	PROGRAMMED_CELL_DEATH
BIRC3	baculoviral IAP repeat-containing 3				NEGATIVE_REGULATION_OF_APOPTOSIS	NEGATIVE_REGULATION_OF_DEVELOPMENTAL_PROCESS		NEGATIVE_REGULATION_OF_PROGRAMMED_CELL_DEATH									ANTI_APOPTOSIS	REGULATION_OF_APOPTOSIS		REGULATION_OF_PROGRAMMED_CELL_DEATH		APOPTOSIS_GO	PROGRAMMED_CELL_DEATH
FAS	Fas (TNF receptor superfamily, member 6)				NEGATIVE_REGULATION_OF_APOPTOSIS	NEGATIVE_REGULATION_OF_DEVELOPMENTAL_PROCESS		NEGATIVE_REGULATION_OF_PROGRAMMED_CELL_DEATH									ANTI_APOPTOSIS	REGULATION_OF_APOPTOSIS		REGULATION_OF_PROGRAMMED_CELL_DEATH		APOPTOSIS_GO	PROGRAMMED_CELL_DEATH
CFL1	cofilin 1 (non-muscle)				NEGATIVE_REGULATION_OF_APOPTOSIS	NEGATIVE_REGULATION_OF_DEVELOPMENTAL_PROCESS		NEGATIVE_REGULATION_OF_PROGRAMMED_CELL_DEATH									ANTI_APOPTOSIS	REGULATION_OF_APOPTOSIS		REGULATION_OF_PROGRAMMED_CELL_DEATH		APOPTOSIS_GO	PROGRAMMED_CELL_DEATH
HDAC1	histone deacetylase 1				NEGATIVE_REGULATION_OF_APOPTOSIS	NEGATIVE_REGULATION_OF_DEVELOPMENTAL_PROCESS		NEGATIVE_REGULATION_OF_PROGRAMMED_CELL_DEATH									ANTI_APOPTOSIS	REGULATION_OF_APOPTOSIS		REGULATION_OF_PROGRAMMED_CELL_DEATH		APOPTOSIS_GO	PROGRAMMED_CELL_DEATH
HDAC3	histone deacetylase 3				NEGATIVE_REGULATION_OF_APOPTOSIS	NEGATIVE_REGULATION_OF_DEVELOPMENTAL_PROCESS		NEGATIVE_REGULATION_OF_PROGRAMMED_CELL_DEATH									ANTI_APOPTOSIS	REGULATION_OF_APOPTOSIS		REGULATION_OF_PROGRAMMED_CELL_DEATH		APOPTOSIS_GO	PROGRAMMED_CELL_DEATH
SNCA	synuclein, alpha (non A4 component of amyloid precursor)				NEGATIVE_REGULATION_OF_APOPTOSIS	NEGATIVE_REGULATION_OF_DEVELOPMENTAL_PROCESS		NEGATIVE_REGULATION_OF_PROGRAMMED_CELL_DEATH									ANTI_APOPTOSIS	REGULATION_OF_APOPTOSIS		REGULATION_OF_PROGRAMMED_CELL_DEATH		APOPTOSIS_GO	PROGRAMMED_CELL_DEATH
NAIP	-				NEGATIVE_REGULATION_OF_APOPTOSIS	NEGATIVE_REGULATION_OF_DEVELOPMENTAL_PROCESS		NEGATIVE_REGULATION_OF_PROGRAMMED_CELL_DEATH									ANTI_APOPTOSIS	REGULATION_OF_APOPTOSIS		REGULATION_OF_PROGRAMMED_CELL_DEATH		APOPTOSIS_GO	PROGRAMMED_CELL_DEATH
PRKCZ	protein kinase C, zeta				NEGATIVE_REGULATION_OF_APOPTOSIS	NEGATIVE_REGULATION_OF_DEVELOPMENTAL_PROCESS		NEGATIVE_REGULATION_OF_PROGRAMMED_CELL_DEATH									ANTI_APOPTOSIS	REGULATION_OF_APOPTOSIS		REGULATION_OF_PROGRAMMED_CELL_DEATH		APOPTOSIS_GO	PROGRAMMED_CELL_DEATH
ANXA5	annexin A5				NEGATIVE_REGULATION_OF_APOPTOSIS	NEGATIVE_REGULATION_OF_DEVELOPMENTAL_PROCESS		NEGATIVE_REGULATION_OF_PROGRAMMED_CELL_DEATH									ANTI_APOPTOSIS	REGULATION_OF_APOPTOSIS		REGULATION_OF_PROGRAMMED_CELL_DEATH		APOPTOSIS_GO	PROGRAMMED_CELL_DEATH
SERPINB9	serpin peptidase inhibitor, clade B (ovalbumin), member 9				NEGATIVE_REGULATION_OF_APOPTOSIS	NEGATIVE_REGULATION_OF_DEVELOPMENTAL_PROCESS		NEGATIVE_REGULATION_OF_PROGRAMMED_CELL_DEATH									ANTI_APOPTOSIS	REGULATION_OF_APOPTOSIS		REGULATION_OF_PROGRAMMED_CELL_DEATH		APOPTOSIS_GO	PROGRAMMED_CELL_DEATH
YWHAZ	tyrosine 3-monooxygenase/tryptophan 5-monooxygenase activation protein, zeta polypeptide				NEGATIVE_REGULATION_OF_APOPTOSIS	NEGATIVE_REGULATION_OF_DEVELOPMENTAL_PROCESS		NEGATIVE_REGULATION_OF_PROGRAMMED_CELL_DEATH									ANTI_APOPTOSIS	REGULATION_OF_APOPTOSIS		REGULATION_OF_PROGRAMMED_CELL_DEATH		APOPTOSIS_GO	PROGRAMMED_CELL_DEATH
AATF	apoptosis antagonizing transcription factor				NEGATIVE_REGULATION_OF_APOPTOSIS	NEGATIVE_REGULATION_OF_DEVELOPMENTAL_PROCESS		NEGATIVE_REGULATION_OF_PROGRAMMED_CELL_DEATH									ANTI_APOPTOSIS	REGULATION_OF_APOPTOSIS		REGULATION_OF_PROGRAMMED_CELL_DEATH		APOPTOSIS_GO	PROGRAMMED_CELL_DEATH
BCL2A1	BCL2-related protein A1				NEGATIVE_REGULATION_OF_APOPTOSIS	NEGATIVE_REGULATION_OF_DEVELOPMENTAL_PROCESS		NEGATIVE_REGULATION_OF_PROGRAMMED_CELL_DEATH									ANTI_APOPTOSIS	REGULATION_OF_APOPTOSIS		REGULATION_OF_PROGRAMMED_CELL_DEATH		APOPTOSIS_GO	PROGRAMMED_CELL_DEATH
BIRC6	baculoviral IAP repeat-containing 6 (apollon)				NEGATIVE_REGULATION_OF_APOPTOSIS	NEGATIVE_REGULATION_OF_DEVELOPMENTAL_PROCESS		NEGATIVE_REGULATION_OF_PROGRAMMED_CELL_DEATH									ANTI_APOPTOSIS	REGULATION_OF_APOPTOSIS		REGULATION_OF_PROGRAMMED_CELL_DEATH		APOPTOSIS_GO	PROGRAMMED_CELL_DEATH
DAD1	defender against cell death 1				NEGATIVE_REGULATION_OF_APOPTOSIS	NEGATIVE_REGULATION_OF_DEVELOPMENTAL_PROCESS		NEGATIVE_REGULATION_OF_PROGRAMMED_CELL_DEATH									ANTI_APOPTOSIS	REGULATION_OF_APOPTOSIS		REGULATION_OF_PROGRAMMED_CELL_DEATH		APOPTOSIS_GO	PROGRAMMED_CELL_DEATH
GLO1	glyoxalase I				NEGATIVE_REGULATION_OF_APOPTOSIS	NEGATIVE_REGULATION_OF_DEVELOPMENTAL_PROCESS		NEGATIVE_REGULATION_OF_PROGRAMMED_CELL_DEATH									ANTI_APOPTOSIS	REGULATION_OF_APOPTOSIS		REGULATION_OF_PROGRAMMED_CELL_DEATH		APOPTOSIS_GO	PROGRAMMED_CELL_DEATH
SERPINB2	serpin peptidase inhibitor, clade B (ovalbumin), member 2				NEGATIVE_REGULATION_OF_APOPTOSIS	NEGATIVE_REGULATION_OF_DEVELOPMENTAL_PROCESS		NEGATIVE_REGULATION_OF_PROGRAMMED_CELL_DEATH									ANTI_APOPTOSIS	REGULATION_OF_APOPTOSIS		REGULATION_OF_PROGRAMMED_CELL_DEATH		APOPTOSIS_GO	PROGRAMMED_CELL_DEATH
SON	SON DNA binding protein				NEGATIVE_REGULATION_OF_APOPTOSIS	NEGATIVE_REGULATION_OF_DEVELOPMENTAL_PROCESS		NEGATIVE_REGULATION_OF_PROGRAMMED_CELL_DEATH									ANTI_APOPTOSIS	REGULATION_OF_APOPTOSIS		REGULATION_OF_PROGRAMMED_CELL_DEATH		APOPTOSIS_GO	PROGRAMMED_CELL_DEATH
TPT1	tumor protein, translationally-controlled 1				NEGATIVE_REGULATION_OF_APOPTOSIS	NEGATIVE_REGULATION_OF_DEVELOPMENTAL_PROCESS		NEGATIVE_REGULATION_OF_PROGRAMMED_CELL_DEATH									ANTI_APOPTOSIS	REGULATION_OF_APOPTOSIS		REGULATION_OF_PROGRAMMED_CELL_DEATH		APOPTOSIS_GO	PROGRAMMED_CELL_DEATH
GSK3B	glycogen synthase kinase 3 beta				NEGATIVE_REGULATION_OF_APOPTOSIS	NEGATIVE_REGULATION_OF_DEVELOPMENTAL_PROCESS		NEGATIVE_REGULATION_OF_PROGRAMMED_CELL_DEATH										REGULATION_OF_APOPTOSIS		REGULATION_OF_PROGRAMMED_CELL_DEATH		APOPTOSIS_GO	PROGRAMMED_CELL_DEATH										CELLULAR_RESPONSE_TO_STIMULUS
CASP3	caspase 3, apoptosis-related cysteine peptidase				NEGATIVE_REGULATION_OF_APOPTOSIS	NEGATIVE_REGULATION_OF_DEVELOPMENTAL_PROCESS		NEGATIVE_REGULATION_OF_PROGRAMMED_CELL_DEATH										REGULATION_OF_APOPTOSIS		REGULATION_OF_PROGRAMMED_CELL_DEATH		APOPTOSIS_GO	PROGRAMMED_CELL_DEATH
BCL3	B-cell CLL/lymphoma 3				NEGATIVE_REGULATION_OF_APOPTOSIS	NEGATIVE_REGULATION_OF_DEVELOPMENTAL_PROCESS		NEGATIVE_REGULATION_OF_PROGRAMMED_CELL_DEATH										REGULATION_OF_APOPTOSIS		REGULATION_OF_PROGRAMMED_CELL_DEATH		APOPTOSIS_GO	PROGRAMMED_CELL_DEATH
MAPK8	mitogen-activated protein kinase 8				NEGATIVE_REGULATION_OF_APOPTOSIS	NEGATIVE_REGULATION_OF_DEVELOPMENTAL_PROCESS		NEGATIVE_REGULATION_OF_PROGRAMMED_CELL_DEATH										REGULATION_OF_APOPTOSIS		REGULATION_OF_PROGRAMMED_CELL_DEATH		APOPTOSIS_GO	PROGRAMMED_CELL_DEATH
MIF	macrophage migration inhibitory factor (glycosylation-inhibiting factor)				NEGATIVE_REGULATION_OF_APOPTOSIS	NEGATIVE_REGULATION_OF_DEVELOPMENTAL_PROCESS		NEGATIVE_REGULATION_OF_PROGRAMMED_CELL_DEATH										REGULATION_OF_APOPTOSIS		REGULATION_OF_PROGRAMMED_CELL_DEATH		APOPTOSIS_GO	PROGRAMMED_CELL_DEATH
KRT18	keratin 18				NEGATIVE_REGULATION_OF_APOPTOSIS	NEGATIVE_REGULATION_OF_DEVELOPMENTAL_PROCESS		NEGATIVE_REGULATION_OF_PROGRAMMED_CELL_DEATH										REGULATION_OF_APOPTOSIS		REGULATION_OF_PROGRAMMED_CELL_DEATH		APOPTOSIS_GO	PROGRAMMED_CELL_DEATH
AHSG	alpha-2-HS-glycoprotein					NEGATIVE_REGULATION_OF_DEVELOPMENTAL_PROCESS	RESPONSE_TO_WOUNDING		RESPONSE_TO_EXTERNAL_STIMULUS					REGULATION_OF_RESPONSE_TO_EXTERNAL_STIMULUS										INFLAMMATORY_RESPONSE
HDAC4	histone deacetylase 4					NEGATIVE_REGULATION_OF_DEVELOPMENTAL_PROCESS	RESPONSE_TO_WOUNDING		RESPONSE_TO_EXTERNAL_STIMULUS															INFLAMMATORY_RESPONSE
SERPINF1	serpin peptidase inhibitor, clade F (alpha-2 antiplasmin, pigment epithelium derived factor), member 1					NEGATIVE_REGULATION_OF_DEVELOPMENTAL_PROCESS
NOTCH1	Notch homolog 1, translocation-associated (Drosophila)					NEGATIVE_REGULATION_OF_DEVELOPMENTAL_PROCESS
NOTCH4	Notch homolog 4 (Drosophila)					NEGATIVE_REGULATION_OF_DEVELOPMENTAL_PROCESS
SIRT2	sirtuin (silent mating type information regulation 2 homolog) 2 (S. cerevisiae)					NEGATIVE_REGULATION_OF_DEVELOPMENTAL_PROCESS
TNFRSF1A	tumor necrosis factor receptor superfamily, member 1A						RESPONSE_TO_WOUNDING		RESPONSE_TO_EXTERNAL_STIMULUS					REGULATION_OF_RESPONSE_TO_EXTERNAL_STIMULUS										INFLAMMATORY_RESPONSE
ADORA1	adenosine A1 receptor						RESPONSE_TO_WOUNDING		RESPONSE_TO_EXTERNAL_STIMULUS									REGULATION_OF_APOPTOSIS		REGULATION_OF_PROGRAMMED_CELL_DEATH		APOPTOSIS_GO	PROGRAMMED_CELL_DEATH	INFLAMMATORY_RESPONSE																CELL_CELL_SIGNALING
IFNA2	interferon, alpha 2						RESPONSE_TO_WOUNDING		RESPONSE_TO_EXTERNAL_STIMULUS									REGULATION_OF_APOPTOSIS		REGULATION_OF_PROGRAMMED_CELL_DEATH		APOPTOSIS_GO	PROGRAMMED_CELL_DEATH	INFLAMMATORY_RESPONSE																CELL_CELL_SIGNALING
IL5	interleukin 5 (colony-stimulating factor, eosinophil)						RESPONSE_TO_WOUNDING		RESPONSE_TO_EXTERNAL_STIMULUS															INFLAMMATORY_RESPONSE
NOX4	NADPH oxidase 4						RESPONSE_TO_WOUNDING		RESPONSE_TO_EXTERNAL_STIMULUS															INFLAMMATORY_RESPONSE
MBL2	mannose-binding lectin (protein C) 2, soluble (opsonic defect)						RESPONSE_TO_WOUNDING		RESPONSE_TO_EXTERNAL_STIMULUS															INFLAMMATORY_RESPONSE
ELF3	E74-like factor 3 (ets domain transcription factor, epithelial-specific )						RESPONSE_TO_WOUNDING		RESPONSE_TO_EXTERNAL_STIMULUS															INFLAMMATORY_RESPONSE
LBP	lipopolysaccharide binding protein						RESPONSE_TO_WOUNDING		RESPONSE_TO_EXTERNAL_STIMULUS															INFLAMMATORY_RESPONSE
CEBPB	CCAAT/enhancer binding protein (C/EBP), beta						RESPONSE_TO_WOUNDING		RESPONSE_TO_EXTERNAL_STIMULUS															INFLAMMATORY_RESPONSE
APCS	amyloid P component, serum						RESPONSE_TO_WOUNDING		RESPONSE_TO_EXTERNAL_STIMULUS															INFLAMMATORY_RESPONSE
FOS	v-fos FBJ murine osteosarcoma viral oncogene homolog						RESPONSE_TO_WOUNDING		RESPONSE_TO_EXTERNAL_STIMULUS															INFLAMMATORY_RESPONSE
AGER	advanced glycosylation end product-specific receptor						RESPONSE_TO_WOUNDING		RESPONSE_TO_EXTERNAL_STIMULUS															INFLAMMATORY_RESPONSE
AIF1	allograft inflammatory factor 1						RESPONSE_TO_WOUNDING		RESPONSE_TO_EXTERNAL_STIMULUS															INFLAMMATORY_RESPONSE
CCL3L3	chemokine (C-C motif) ligand 3-like 3						RESPONSE_TO_WOUNDING		RESPONSE_TO_EXTERNAL_STIMULUS															INFLAMMATORY_RESPONSE
CD40	CD40 molecule, TNF receptor superfamily member 5						RESPONSE_TO_WOUNDING		RESPONSE_TO_EXTERNAL_STIMULUS															INFLAMMATORY_RESPONSE
MGLL	monoglyceride lipase						RESPONSE_TO_WOUNDING		RESPONSE_TO_EXTERNAL_STIMULUS															INFLAMMATORY_RESPONSE
NFATC4	nuclear factor of activated T-cells, cytoplasmic, calcineurin-dependent 4						RESPONSE_TO_WOUNDING		RESPONSE_TO_EXTERNAL_STIMULUS															INFLAMMATORY_RESPONSE
ALOX15	arachidonate 15-lipoxygenase						RESPONSE_TO_WOUNDING		RESPONSE_TO_EXTERNAL_STIMULUS															INFLAMMATORY_RESPONSE
CRP	C-reactive protein, pentraxin-related						RESPONSE_TO_WOUNDING		RESPONSE_TO_EXTERNAL_STIMULUS															INFLAMMATORY_RESPONSE
CYBB	cytochrome b-245, beta polypeptide (chronic granulomatous disease)						RESPONSE_TO_WOUNDING		RESPONSE_TO_EXTERNAL_STIMULUS															INFLAMMATORY_RESPONSE
F11R	F11 receptor						RESPONSE_TO_WOUNDING		RESPONSE_TO_EXTERNAL_STIMULUS															INFLAMMATORY_RESPONSE
LYZ	lysozyme (renal amyloidosis)						RESPONSE_TO_WOUNDING		RESPONSE_TO_EXTERNAL_STIMULUS															INFLAMMATORY_RESPONSE
PLA2G7	phospholipase A2, group VII (platelet-activating factor acetylhydrolase, plasma)						RESPONSE_TO_WOUNDING		RESPONSE_TO_EXTERNAL_STIMULUS															INFLAMMATORY_RESPONSE
PTX3	pentraxin-related gene, rapidly induced by IL-1 beta						RESPONSE_TO_WOUNDING		RESPONSE_TO_EXTERNAL_STIMULUS															INFLAMMATORY_RESPONSE
S100A8	S100 calcium binding protein A8						RESPONSE_TO_WOUNDING		RESPONSE_TO_EXTERNAL_STIMULUS															INFLAMMATORY_RESPONSE
SELE	selectin E (endothelial adhesion molecule 1)						RESPONSE_TO_WOUNDING		RESPONSE_TO_EXTERNAL_STIMULUS															INFLAMMATORY_RESPONSE
ACHE	acetylcholinesterase (Yt blood group)						RESPONSE_TO_WOUNDING		RESPONSE_TO_EXTERNAL_STIMULUS																	AMYLOID_PRECURSOR_PROTEIN_METABOLIC_PROCESS
GAP43	growth associated protein 43						RESPONSE_TO_WOUNDING		RESPONSE_TO_EXTERNAL_STIMULUS																										POSITIVE_REGULATION_OF_CATALYTIC_ACTIVITY		SECOND_MESSENGER_MEDIATED_SIGNALING
MDK	midkine (neurite growth-promoting factor 2)						RESPONSE_TO_WOUNDING		RESPONSE_TO_EXTERNAL_STIMULUS
CTGF	connective tissue growth factor						RESPONSE_TO_WOUNDING		RESPONSE_TO_EXTERNAL_STIMULUS
SST	somatostatin								RESPONSE_TO_EXTERNAL_STIMULUS									REGULATION_OF_APOPTOSIS		REGULATION_OF_PROGRAMMED_CELL_DEATH		APOPTOSIS_GO	PROGRAMMED_CELL_DEATH						TRANSMISSION_OF_NERVE_IMPULSE			SYNAPTIC_TRANSMISSION								CELL_CELL_SIGNALING
SREBF1	sterol regulatory element binding transcription factor 1								RESPONSE_TO_EXTERNAL_STIMULUS																								CELLULAR_RESPONSE_TO_STIMULUS
PER1	period homolog 1 (Drosophila)								RESPONSE_TO_EXTERNAL_STIMULUS																																			CIRCADIAN_RHYTHM
PPARG	peroxisome proliferative activated receptor, gamma								RESPONSE_TO_EXTERNAL_STIMULUS
OGT	O-linked N-acetylglucosamine (GlcNAc) transferase (UDP-N-acetylglucosamine:polypeptide-N-acetylglucosaminyl transferase)								RESPONSE_TO_EXTERNAL_STIMULUS
PDC	phosducin								RESPONSE_TO_EXTERNAL_STIMULUS
RHO	rhodopsin (opsin 2, rod pigment) (retinitis pigmentosa 4, autosomal dominant)								RESPONSE_TO_EXTERNAL_STIMULUS
SAG	S-antigen; retina and pineal gland (arrestin)								RESPONSE_TO_EXTERNAL_STIMULUS
OPN1SW	opsin 1 (cone pigments), short-wave-sensitive (color blindness, tritan)								RESPONSE_TO_EXTERNAL_STIMULUS
ABCA4	ATP-binding cassette, sub-family A (ABC1), member 4								RESPONSE_TO_EXTERNAL_STIMULUS
DRD2	dopamine receptor D2															G_PROTEIN_SIGNALING_COUPLED_TO_CYCLIC_NUCLEOTIDE_SECOND_MESSENGER			CYCLIC_NUCLEOTIDE_MEDIATED_SIGNALING									G_PROTEIN_SIGNALING_COUPLED_TO_CAMP_NUCLEOTIDE_SECOND_MESSENGER	TRANSMISSION_OF_NERVE_IMPULSE		CAMP_MEDIATED_SIGNALING	SYNAPTIC_TRANSMISSION					SECOND_MESSENGER_MEDIATED_SIGNALING			CELL_CELL_SIGNALING
CORT	cortistatin															G_PROTEIN_SIGNALING_COUPLED_TO_CYCLIC_NUCLEOTIDE_SECOND_MESSENGER			CYCLIC_NUCLEOTIDE_MEDIATED_SIGNALING									G_PROTEIN_SIGNALING_COUPLED_TO_CAMP_NUCLEOTIDE_SECOND_MESSENGER	TRANSMISSION_OF_NERVE_IMPULSE		CAMP_MEDIATED_SIGNALING	SYNAPTIC_TRANSMISSION					SECOND_MESSENGER_MEDIATED_SIGNALING			CELL_CELL_SIGNALING
ADCYAP1	adenylate cyclase activating polypeptide 1 (pituitary)															G_PROTEIN_SIGNALING_COUPLED_TO_CYCLIC_NUCLEOTIDE_SECOND_MESSENGER			CYCLIC_NUCLEOTIDE_MEDIATED_SIGNALING									G_PROTEIN_SIGNALING_COUPLED_TO_CAMP_NUCLEOTIDE_SECOND_MESSENGER		G_PROTEIN_SIGNALING_ADENYLATE_CYCLASE_ACTIVATING_PATHWAY	CAMP_MEDIATED_SIGNALING				POSITIVE_REGULATION_OF_CATALYTIC_ACTIVITY		SECOND_MESSENGER_MEDIATED_SIGNALING			CELL_CELL_SIGNALING
ADRB2	adrenergic, beta-2-, receptor, surface															G_PROTEIN_SIGNALING_COUPLED_TO_CYCLIC_NUCLEOTIDE_SECOND_MESSENGER			CYCLIC_NUCLEOTIDE_MEDIATED_SIGNALING									G_PROTEIN_SIGNALING_COUPLED_TO_CAMP_NUCLEOTIDE_SECOND_MESSENGER		G_PROTEIN_SIGNALING_ADENYLATE_CYCLASE_ACTIVATING_PATHWAY	CAMP_MEDIATED_SIGNALING				POSITIVE_REGULATION_OF_CATALYTIC_ACTIVITY		SECOND_MESSENGER_MEDIATED_SIGNALING
ADRB3	adrenergic, beta-3-, receptor															G_PROTEIN_SIGNALING_COUPLED_TO_CYCLIC_NUCLEOTIDE_SECOND_MESSENGER			CYCLIC_NUCLEOTIDE_MEDIATED_SIGNALING									G_PROTEIN_SIGNALING_COUPLED_TO_CAMP_NUCLEOTIDE_SECOND_MESSENGER		G_PROTEIN_SIGNALING_ADENYLATE_CYCLASE_ACTIVATING_PATHWAY	CAMP_MEDIATED_SIGNALING				POSITIVE_REGULATION_OF_CATALYTIC_ACTIVITY		SECOND_MESSENGER_MEDIATED_SIGNALING
CRHR1	corticotropin releasing hormone receptor 1															G_PROTEIN_SIGNALING_COUPLED_TO_CYCLIC_NUCLEOTIDE_SECOND_MESSENGER			CYCLIC_NUCLEOTIDE_MEDIATED_SIGNALING									G_PROTEIN_SIGNALING_COUPLED_TO_CAMP_NUCLEOTIDE_SECOND_MESSENGER		G_PROTEIN_SIGNALING_ADENYLATE_CYCLASE_ACTIVATING_PATHWAY	CAMP_MEDIATED_SIGNALING				POSITIVE_REGULATION_OF_CATALYTIC_ACTIVITY		SECOND_MESSENGER_MEDIATED_SIGNALING
GNAS	GNAS complex locus															G_PROTEIN_SIGNALING_COUPLED_TO_CYCLIC_NUCLEOTIDE_SECOND_MESSENGER			CYCLIC_NUCLEOTIDE_MEDIATED_SIGNALING									G_PROTEIN_SIGNALING_COUPLED_TO_CAMP_NUCLEOTIDE_SECOND_MESSENGER		G_PROTEIN_SIGNALING_ADENYLATE_CYCLASE_ACTIVATING_PATHWAY	CAMP_MEDIATED_SIGNALING				POSITIVE_REGULATION_OF_CATALYTIC_ACTIVITY		SECOND_MESSENGER_MEDIATED_SIGNALING
ACR	acrosin															G_PROTEIN_SIGNALING_COUPLED_TO_CYCLIC_NUCLEOTIDE_SECOND_MESSENGER			CYCLIC_NUCLEOTIDE_MEDIATED_SIGNALING									G_PROTEIN_SIGNALING_COUPLED_TO_CAMP_NUCLEOTIDE_SECOND_MESSENGER		G_PROTEIN_SIGNALING_ADENYLATE_CYCLASE_ACTIVATING_PATHWAY	CAMP_MEDIATED_SIGNALING				POSITIVE_REGULATION_OF_CATALYTIC_ACTIVITY		SECOND_MESSENGER_MEDIATED_SIGNALING
CAP1	CAP, adenylate cyclase-associated protein 1 (yeast)															G_PROTEIN_SIGNALING_COUPLED_TO_CYCLIC_NUCLEOTIDE_SECOND_MESSENGER			CYCLIC_NUCLEOTIDE_MEDIATED_SIGNALING									G_PROTEIN_SIGNALING_COUPLED_TO_CAMP_NUCLEOTIDE_SECOND_MESSENGER		G_PROTEIN_SIGNALING_ADENYLATE_CYCLASE_ACTIVATING_PATHWAY	CAMP_MEDIATED_SIGNALING				POSITIVE_REGULATION_OF_CATALYTIC_ACTIVITY		SECOND_MESSENGER_MEDIATED_SIGNALING
ADRB1	adrenergic, beta-1-, receptor															G_PROTEIN_SIGNALING_COUPLED_TO_CYCLIC_NUCLEOTIDE_SECOND_MESSENGER			CYCLIC_NUCLEOTIDE_MEDIATED_SIGNALING									G_PROTEIN_SIGNALING_COUPLED_TO_CAMP_NUCLEOTIDE_SECOND_MESSENGER		G_PROTEIN_SIGNALING_ADENYLATE_CYCLASE_ACTIVATING_PATHWAY	CAMP_MEDIATED_SIGNALING				POSITIVE_REGULATION_OF_CATALYTIC_ACTIVITY		SECOND_MESSENGER_MEDIATED_SIGNALING
DRD5	dopamine receptor D5															G_PROTEIN_SIGNALING_COUPLED_TO_CYCLIC_NUCLEOTIDE_SECOND_MESSENGER			CYCLIC_NUCLEOTIDE_MEDIATED_SIGNALING									G_PROTEIN_SIGNALING_COUPLED_TO_CAMP_NUCLEOTIDE_SECOND_MESSENGER		G_PROTEIN_SIGNALING_ADENYLATE_CYCLASE_ACTIVATING_PATHWAY	CAMP_MEDIATED_SIGNALING				POSITIVE_REGULATION_OF_CATALYTIC_ACTIVITY		SECOND_MESSENGER_MEDIATED_SIGNALING
GHRH	growth hormone releasing hormone															G_PROTEIN_SIGNALING_COUPLED_TO_CYCLIC_NUCLEOTIDE_SECOND_MESSENGER			CYCLIC_NUCLEOTIDE_MEDIATED_SIGNALING									G_PROTEIN_SIGNALING_COUPLED_TO_CAMP_NUCLEOTIDE_SECOND_MESSENGER		G_PROTEIN_SIGNALING_ADENYLATE_CYCLASE_ACTIVATING_PATHWAY	CAMP_MEDIATED_SIGNALING						SECOND_MESSENGER_MEDIATED_SIGNALING			CELL_CELL_SIGNALING
PTHLH	parathyroid hormone-like hormone															G_PROTEIN_SIGNALING_COUPLED_TO_CYCLIC_NUCLEOTIDE_SECOND_MESSENGER			CYCLIC_NUCLEOTIDE_MEDIATED_SIGNALING									G_PROTEIN_SIGNALING_COUPLED_TO_CAMP_NUCLEOTIDE_SECOND_MESSENGER		G_PROTEIN_SIGNALING_ADENYLATE_CYCLASE_ACTIVATING_PATHWAY	CAMP_MEDIATED_SIGNALING						SECOND_MESSENGER_MEDIATED_SIGNALING			CELL_CELL_SIGNALING
ADRA2A	adrenergic, alpha-2A-, receptor															G_PROTEIN_SIGNALING_COUPLED_TO_CYCLIC_NUCLEOTIDE_SECOND_MESSENGER			CYCLIC_NUCLEOTIDE_MEDIATED_SIGNALING									G_PROTEIN_SIGNALING_COUPLED_TO_CAMP_NUCLEOTIDE_SECOND_MESSENGER			CAMP_MEDIATED_SIGNALING				POSITIVE_REGULATION_OF_CATALYTIC_ACTIVITY		SECOND_MESSENGER_MEDIATED_SIGNALING
ADRA1D	adrenergic, alpha-1D-, receptor															G_PROTEIN_SIGNALING_COUPLED_TO_CYCLIC_NUCLEOTIDE_SECOND_MESSENGER			CYCLIC_NUCLEOTIDE_MEDIATED_SIGNALING									G_PROTEIN_SIGNALING_COUPLED_TO_CAMP_NUCLEOTIDE_SECOND_MESSENGER			CAMP_MEDIATED_SIGNALING						SECOND_MESSENGER_MEDIATED_SIGNALING			CELL_CELL_SIGNALING
ADRA1B	adrenergic, alpha-1B-, receptor															G_PROTEIN_SIGNALING_COUPLED_TO_CYCLIC_NUCLEOTIDE_SECOND_MESSENGER			CYCLIC_NUCLEOTIDE_MEDIATED_SIGNALING									G_PROTEIN_SIGNALING_COUPLED_TO_CAMP_NUCLEOTIDE_SECOND_MESSENGER			CAMP_MEDIATED_SIGNALING						SECOND_MESSENGER_MEDIATED_SIGNALING			CELL_CELL_SIGNALING
EDNRB	endothelin receptor type B															G_PROTEIN_SIGNALING_COUPLED_TO_CYCLIC_NUCLEOTIDE_SECOND_MESSENGER			CYCLIC_NUCLEOTIDE_MEDIATED_SIGNALING									G_PROTEIN_SIGNALING_COUPLED_TO_CAMP_NUCLEOTIDE_SECOND_MESSENGER			CAMP_MEDIATED_SIGNALING						SECOND_MESSENGER_MEDIATED_SIGNALING
CHRM2	cholinergic receptor, muscarinic 2															G_PROTEIN_SIGNALING_COUPLED_TO_CYCLIC_NUCLEOTIDE_SECOND_MESSENGER			CYCLIC_NUCLEOTIDE_MEDIATED_SIGNALING									G_PROTEIN_SIGNALING_COUPLED_TO_CAMP_NUCLEOTIDE_SECOND_MESSENGER			CAMP_MEDIATED_SIGNALING						SECOND_MESSENGER_MEDIATED_SIGNALING
PTGER4	prostaglandin E receptor 4 (subtype EP4)															G_PROTEIN_SIGNALING_COUPLED_TO_CYCLIC_NUCLEOTIDE_SECOND_MESSENGER			CYCLIC_NUCLEOTIDE_MEDIATED_SIGNALING									G_PROTEIN_SIGNALING_COUPLED_TO_CAMP_NUCLEOTIDE_SECOND_MESSENGER			CAMP_MEDIATED_SIGNALING						SECOND_MESSENGER_MEDIATED_SIGNALING
GRK5	G protein-coupled receptor kinase 5															G_PROTEIN_SIGNALING_COUPLED_TO_CYCLIC_NUCLEOTIDE_SECOND_MESSENGER			CYCLIC_NUCLEOTIDE_MEDIATED_SIGNALING									G_PROTEIN_SIGNALING_COUPLED_TO_CAMP_NUCLEOTIDE_SECOND_MESSENGER			CAMP_MEDIATED_SIGNALING						SECOND_MESSENGER_MEDIATED_SIGNALING
CRHR2	corticotropin releasing hormone receptor 2															G_PROTEIN_SIGNALING_COUPLED_TO_CYCLIC_NUCLEOTIDE_SECOND_MESSENGER			CYCLIC_NUCLEOTIDE_MEDIATED_SIGNALING									G_PROTEIN_SIGNALING_COUPLED_TO_CAMP_NUCLEOTIDE_SECOND_MESSENGER			CAMP_MEDIATED_SIGNALING						SECOND_MESSENGER_MEDIATED_SIGNALING
HTR7	5-hydroxytryptamine (serotonin) receptor 7 (adenylate cyclase-coupled)															G_PROTEIN_SIGNALING_COUPLED_TO_CYCLIC_NUCLEOTIDE_SECOND_MESSENGER			CYCLIC_NUCLEOTIDE_MEDIATED_SIGNALING										TRANSMISSION_OF_NERVE_IMPULSE			SYNAPTIC_TRANSMISSION					SECOND_MESSENGER_MEDIATED_SIGNALING			CELL_CELL_SIGNALING				CIRCADIAN_RHYTHM
HTR1B	5-hydroxytryptamine (serotonin) receptor 1B															G_PROTEIN_SIGNALING_COUPLED_TO_CYCLIC_NUCLEOTIDE_SECOND_MESSENGER			CYCLIC_NUCLEOTIDE_MEDIATED_SIGNALING										TRANSMISSION_OF_NERVE_IMPULSE			SYNAPTIC_TRANSMISSION					SECOND_MESSENGER_MEDIATED_SIGNALING			CELL_CELL_SIGNALING
HTR1D	5-hydroxytryptamine (serotonin) receptor 1D															G_PROTEIN_SIGNALING_COUPLED_TO_CYCLIC_NUCLEOTIDE_SECOND_MESSENGER			CYCLIC_NUCLEOTIDE_MEDIATED_SIGNALING										TRANSMISSION_OF_NERVE_IMPULSE			SYNAPTIC_TRANSMISSION					SECOND_MESSENGER_MEDIATED_SIGNALING			CELL_CELL_SIGNALING
HTR1E	5-hydroxytryptamine (serotonin) receptor 1E															G_PROTEIN_SIGNALING_COUPLED_TO_CYCLIC_NUCLEOTIDE_SECOND_MESSENGER			CYCLIC_NUCLEOTIDE_MEDIATED_SIGNALING										TRANSMISSION_OF_NERVE_IMPULSE			SYNAPTIC_TRANSMISSION					SECOND_MESSENGER_MEDIATED_SIGNALING			CELL_CELL_SIGNALING
HTR1F	5-hydroxytryptamine (serotonin) receptor 1F															G_PROTEIN_SIGNALING_COUPLED_TO_CYCLIC_NUCLEOTIDE_SECOND_MESSENGER			CYCLIC_NUCLEOTIDE_MEDIATED_SIGNALING										TRANSMISSION_OF_NERVE_IMPULSE			SYNAPTIC_TRANSMISSION					SECOND_MESSENGER_MEDIATED_SIGNALING			CELL_CELL_SIGNALING
HTR6	5-hydroxytryptamine (serotonin) receptor 6															G_PROTEIN_SIGNALING_COUPLED_TO_CYCLIC_NUCLEOTIDE_SECOND_MESSENGER			CYCLIC_NUCLEOTIDE_MEDIATED_SIGNALING										TRANSMISSION_OF_NERVE_IMPULSE			SYNAPTIC_TRANSMISSION					SECOND_MESSENGER_MEDIATED_SIGNALING			CELL_CELL_SIGNALING
TSHR	thyroid stimulating hormone receptor															G_PROTEIN_SIGNALING_COUPLED_TO_CYCLIC_NUCLEOTIDE_SECOND_MESSENGER			CYCLIC_NUCLEOTIDE_MEDIATED_SIGNALING																		SECOND_MESSENGER_MEDIATED_SIGNALING			CELL_CELL_SIGNALING
OPRD1	opioid receptor, delta 1															G_PROTEIN_SIGNALING_COUPLED_TO_CYCLIC_NUCLEOTIDE_SECOND_MESSENGER			CYCLIC_NUCLEOTIDE_MEDIATED_SIGNALING																		SECOND_MESSENGER_MEDIATED_SIGNALING
HTR4	5-hydroxytryptamine (serotonin) receptor 4															G_PROTEIN_SIGNALING_COUPLED_TO_CYCLIC_NUCLEOTIDE_SECOND_MESSENGER			CYCLIC_NUCLEOTIDE_MEDIATED_SIGNALING																		SECOND_MESSENGER_MEDIATED_SIGNALING
CDK5	cyclin-dependent kinase 5																	REGULATION_OF_APOPTOSIS		REGULATION_OF_PROGRAMMED_CELL_DEATH		APOPTOSIS_GO	PROGRAMMED_CELL_DEATH				REGULATION_OF_NEURON_APOPTOSIS							NEURON_APOPTOSIS
STAT1	signal transducer and activator of transcription 1, 91kDa																	REGULATION_OF_APOPTOSIS		REGULATION_OF_PROGRAMMED_CELL_DEATH		APOPTOSIS_GO	PROGRAMMED_CELL_DEATH												POSITIVE_REGULATION_OF_CATALYTIC_ACTIVITY
CASP8AP2	CASP8 associated protein 2																	REGULATION_OF_APOPTOSIS		REGULATION_OF_PROGRAMMED_CELL_DEATH		APOPTOSIS_GO	PROGRAMMED_CELL_DEATH												POSITIVE_REGULATION_OF_CATALYTIC_ACTIVITY
DIABLO	diablo homolog (Drosophila)																	REGULATION_OF_APOPTOSIS		REGULATION_OF_PROGRAMMED_CELL_DEATH		APOPTOSIS_GO	PROGRAMMED_CELL_DEATH												POSITIVE_REGULATION_OF_CATALYTIC_ACTIVITY
VCP	valosin-containing protein																	REGULATION_OF_APOPTOSIS		REGULATION_OF_PROGRAMMED_CELL_DEATH		APOPTOSIS_GO	PROGRAMMED_CELL_DEATH												POSITIVE_REGULATION_OF_CATALYTIC_ACTIVITY
CYCS	cytochrome c, somatic																	REGULATION_OF_APOPTOSIS		REGULATION_OF_PROGRAMMED_CELL_DEATH		APOPTOSIS_GO	PROGRAMMED_CELL_DEATH												POSITIVE_REGULATION_OF_CATALYTIC_ACTIVITY
IFNB1	interferon, beta 1, fibroblast																	REGULATION_OF_APOPTOSIS		REGULATION_OF_PROGRAMMED_CELL_DEATH		APOPTOSIS_GO	PROGRAMMED_CELL_DEATH												POSITIVE_REGULATION_OF_CATALYTIC_ACTIVITY
APAF1	apoptotic peptidase activating factor																	REGULATION_OF_APOPTOSIS		REGULATION_OF_PROGRAMMED_CELL_DEATH		APOPTOSIS_GO	PROGRAMMED_CELL_DEATH												POSITIVE_REGULATION_OF_CATALYTIC_ACTIVITY
CASP9	caspase 9, apoptosis-related cysteine peptidase																	REGULATION_OF_APOPTOSIS		REGULATION_OF_PROGRAMMED_CELL_DEATH		APOPTOSIS_GO	PROGRAMMED_CELL_DEATH												POSITIVE_REGULATION_OF_CATALYTIC_ACTIVITY
ERN1	endoplasmic reticulum to nucleus signalling 1																	REGULATION_OF_APOPTOSIS		REGULATION_OF_PROGRAMMED_CELL_DEATH		APOPTOSIS_GO	PROGRAMMED_CELL_DEATH												POSITIVE_REGULATION_OF_CATALYTIC_ACTIVITY
MAP3K5	mitogen-activated protein kinase kinase kinase 5																	REGULATION_OF_APOPTOSIS		REGULATION_OF_PROGRAMMED_CELL_DEATH		APOPTOSIS_GO	PROGRAMMED_CELL_DEATH												POSITIVE_REGULATION_OF_CATALYTIC_ACTIVITY
PTH	parathyroid hormone																	REGULATION_OF_APOPTOSIS		REGULATION_OF_PROGRAMMED_CELL_DEATH		APOPTOSIS_GO	PROGRAMMED_CELL_DEATH																	CELL_CELL_SIGNALING
FASLG	Fas ligand (TNF superfamily, member 6)																	REGULATION_OF_APOPTOSIS		REGULATION_OF_PROGRAMMED_CELL_DEATH		APOPTOSIS_GO	PROGRAMMED_CELL_DEATH																	CELL_CELL_SIGNALING
TNFSF10	tumor necrosis factor (ligand) superfamily, member 10																	REGULATION_OF_APOPTOSIS		REGULATION_OF_PROGRAMMED_CELL_DEATH		APOPTOSIS_GO	PROGRAMMED_CELL_DEATH																	CELL_CELL_SIGNALING
LTA	lymphotoxin alpha (TNF superfamily, member 1)																	REGULATION_OF_APOPTOSIS		REGULATION_OF_PROGRAMMED_CELL_DEATH		APOPTOSIS_GO	PROGRAMMED_CELL_DEATH																	CELL_CELL_SIGNALING
IL12A	interleukin 12A (natural killer cell stimulatory factor 1, cytotoxic lymphocyte maturation factor 1, p35)																	REGULATION_OF_APOPTOSIS		REGULATION_OF_PROGRAMMED_CELL_DEATH		APOPTOSIS_GO	PROGRAMMED_CELL_DEATH
BRCA1	breast cancer 1, early onset																	REGULATION_OF_APOPTOSIS		REGULATION_OF_PROGRAMMED_CELL_DEATH		APOPTOSIS_GO	PROGRAMMED_CELL_DEATH
IGFBP3	insulin-like growth factor binding protein 3																	REGULATION_OF_APOPTOSIS		REGULATION_OF_PROGRAMMED_CELL_DEATH		APOPTOSIS_GO	PROGRAMMED_CELL_DEATH
IL12B	interleukin 12B (natural killer cell stimulatory factor 2, cytotoxic lymphocyte maturation factor 2, p40)																	REGULATION_OF_APOPTOSIS		REGULATION_OF_PROGRAMMED_CELL_DEATH		APOPTOSIS_GO	PROGRAMMED_CELL_DEATH
TNFSF14	tumor necrosis factor (ligand) superfamily, member 14																	REGULATION_OF_APOPTOSIS		REGULATION_OF_PROGRAMMED_CELL_DEATH		APOPTOSIS_GO	PROGRAMMED_CELL_DEATH
DNAJB6	DnaJ (Hsp40) homolog, subfamily B, member 6																	REGULATION_OF_APOPTOSIS		REGULATION_OF_PROGRAMMED_CELL_DEATH		APOPTOSIS_GO	PROGRAMMED_CELL_DEATH
TNFRSF25	tumor necrosis factor receptor superfamily, member 25																	REGULATION_OF_APOPTOSIS		REGULATION_OF_PROGRAMMED_CELL_DEATH		APOPTOSIS_GO	PROGRAMMED_CELL_DEATH
FADD	Fas (TNFRSF6)-associated via death domain																	REGULATION_OF_APOPTOSIS		REGULATION_OF_PROGRAMMED_CELL_DEATH		APOPTOSIS_GO	PROGRAMMED_CELL_DEATH
FASTK	Fas-activated serine/threonine kinase																	REGULATION_OF_APOPTOSIS		REGULATION_OF_PROGRAMMED_CELL_DEATH		APOPTOSIS_GO	PROGRAMMED_CELL_DEATH
CD38	CD38 molecule																	REGULATION_OF_APOPTOSIS		REGULATION_OF_PROGRAMMED_CELL_DEATH		APOPTOSIS_GO	PROGRAMMED_CELL_DEATH
PRKCA	protein kinase C, alpha																	REGULATION_OF_APOPTOSIS		REGULATION_OF_PROGRAMMED_CELL_DEATH		APOPTOSIS_GO	PROGRAMMED_CELL_DEATH
TP73	tumor protein p73																	REGULATION_OF_APOPTOSIS		REGULATION_OF_PROGRAMMED_CELL_DEATH		APOPTOSIS_GO	PROGRAMMED_CELL_DEATH
CASP4	caspase 4, apoptosis-related cysteine peptidase																	REGULATION_OF_APOPTOSIS		REGULATION_OF_PROGRAMMED_CELL_DEATH		APOPTOSIS_GO	PROGRAMMED_CELL_DEATH
CASP6	caspase 6, apoptosis-related cysteine peptidase																	REGULATION_OF_APOPTOSIS		REGULATION_OF_PROGRAMMED_CELL_DEATH		APOPTOSIS_GO	PROGRAMMED_CELL_DEATH
CTSB	cathepsin B																	REGULATION_OF_APOPTOSIS		REGULATION_OF_PROGRAMMED_CELL_DEATH		APOPTOSIS_GO	PROGRAMMED_CELL_DEATH
CD2	CD2 molecule																	REGULATION_OF_APOPTOSIS		REGULATION_OF_PROGRAMMED_CELL_DEATH		APOPTOSIS_GO	PROGRAMMED_CELL_DEATH
PDCD7	programmed cell death 7																	REGULATION_OF_APOPTOSIS		REGULATION_OF_PROGRAMMED_CELL_DEATH		APOPTOSIS_GO	PROGRAMMED_CELL_DEATH
PRKCE	protein kinase C, epsilon																	REGULATION_OF_APOPTOSIS		REGULATION_OF_PROGRAMMED_CELL_DEATH		APOPTOSIS_GO	PROGRAMMED_CELL_DEATH
TLR2	toll-like receptor 2																	REGULATION_OF_APOPTOSIS		REGULATION_OF_PROGRAMMED_CELL_DEATH		APOPTOSIS_GO	PROGRAMMED_CELL_DEATH
TRAF3	TNF receptor-associated factor 3																	REGULATION_OF_APOPTOSIS		REGULATION_OF_PROGRAMMED_CELL_DEATH		APOPTOSIS_GO	PROGRAMMED_CELL_DEATH
BCL2L11	BCL2-like 11 (apoptosis facilitator)																	REGULATION_OF_APOPTOSIS		REGULATION_OF_PROGRAMMED_CELL_DEATH		APOPTOSIS_GO	PROGRAMMED_CELL_DEATH
CASP10	caspase 10, apoptosis-related cysteine peptidase																	REGULATION_OF_APOPTOSIS		REGULATION_OF_PROGRAMMED_CELL_DEATH		APOPTOSIS_GO	PROGRAMMED_CELL_DEATH
PHB	prohibitin																	REGULATION_OF_APOPTOSIS		REGULATION_OF_PROGRAMMED_CELL_DEATH		APOPTOSIS_GO	PROGRAMMED_CELL_DEATH
HSPD1	heat shock 60kDa protein 1 (chaperonin)																	REGULATION_OF_APOPTOSIS		REGULATION_OF_PROGRAMMED_CELL_DEATH		APOPTOSIS_GO	PROGRAMMED_CELL_DEATH
WRN	Werner syndrome																	REGULATION_OF_APOPTOSIS		REGULATION_OF_PROGRAMMED_CELL_DEATH		APOPTOSIS_GO	PROGRAMMED_CELL_DEATH
PSEN2	presenilin 2 (Alzheimer disease 4)																					APOPTOSIS_GO	PROGRAMMED_CELL_DEATH			AMYLOID_PRECURSOR_PROTEIN_METABOLIC_PROCESS									POSITIVE_REGULATION_OF_CATALYTIC_ACTIVITY												GLYCOPROTEIN_CATABOLIC_PROCESS
CGB	chorionic gonadotropin, beta polypeptide																					APOPTOSIS_GO	PROGRAMMED_CELL_DEATH																	CELL_CELL_SIGNALING
IL1B	interleukin 1, beta																					APOPTOSIS_GO	PROGRAMMED_CELL_DEATH																	CELL_CELL_SIGNALING
IAPP	islet amyloid polypeptide																					APOPTOSIS_GO	PROGRAMMED_CELL_DEATH																	CELL_CELL_SIGNALING
TSPO	translocator protein (18kDa)																					APOPTOSIS_GO	PROGRAMMED_CELL_DEATH																				LIPID_TRANSPORT
RHOB	ras homolog gene family, member B																					APOPTOSIS_GO	PROGRAMMED_CELL_DEATH
GZMB	granzyme B (granzyme 2, cytotoxic T-lymphocyte-associated serine esterase 1)																					APOPTOSIS_GO	PROGRAMMED_CELL_DEATH
CASP8	caspase 8, apoptosis-related cysteine peptidase																					APOPTOSIS_GO	PROGRAMMED_CELL_DEATH
CASP2	caspase 2, apoptosis-related cysteine peptidase (neural precursor cell expressed, developmentally down-regulated 2)																					APOPTOSIS_GO	PROGRAMMED_CELL_DEATH
CASP7	caspase 7, apoptosis-related cysteine peptidase																					APOPTOSIS_GO	PROGRAMMED_CELL_DEATH
BAD	BCL2-antagonist of cell death																					APOPTOSIS_GO	PROGRAMMED_CELL_DEATH
PTK2B	PTK2B protein tyrosine kinase 2 beta																					APOPTOSIS_GO	PROGRAMMED_CELL_DEATH
PTPN6	protein tyrosine phosphatase, non-receptor type 6																					APOPTOSIS_GO	PROGRAMMED_CELL_DEATH
AHR	aryl hydrocarbon receptor																					APOPTOSIS_GO	PROGRAMMED_CELL_DEATH
SIAH1	seven in absentia homolog 1 (Drosophila)																					APOPTOSIS_GO	PROGRAMMED_CELL_DEATH
E2F1	E2F transcription factor 1																					APOPTOSIS_GO	PROGRAMMED_CELL_DEATH
PAWR	PRKC, apoptosis, WT1, regulator																					APOPTOSIS_GO	PROGRAMMED_CELL_DEATH
RAF1	v-raf-1 murine leukemia viral oncogene homolog 1																					APOPTOSIS_GO	PROGRAMMED_CELL_DEATH
SRA1	steroid receptor RNA activator 1																					APOPTOSIS_GO	PROGRAMMED_CELL_DEATH
ATG12	ATG12 autophagy related 12 homolog (S. cerevisiae)																					APOPTOSIS_GO	PROGRAMMED_CELL_DEATH
DDX41	DEAD (Asp-Glu-Ala-Asp) box polypeptide 41																					APOPTOSIS_GO	PROGRAMMED_CELL_DEATH
NFKBIA	nuclear factor of kappa light polypeptide gene enhancer in B-cells inhibitor, alpha																					APOPTOSIS_GO	PROGRAMMED_CELL_DEATH
PHLDA2	pleckstrin homology-like domain, family A, member 2																					APOPTOSIS_GO	PROGRAMMED_CELL_DEATH
CHRNA4	cholinergic receptor, nicotinic, alpha 4																								RESPONSE_TO_HYPOXIA				TRANSMISSION_OF_NERVE_IMPULSE			SYNAPTIC_TRANSMISSION								CELL_CELL_SIGNALING
ANG	angiogenin, ribonuclease, RNase A family, 5																								RESPONSE_TO_HYPOXIA										POSITIVE_REGULATION_OF_CATALYTIC_ACTIVITY		SECOND_MESSENGER_MEDIATED_SIGNALING
MT3	metallothionein 3 (growth inhibitory factor (neurotrophic))																								RESPONSE_TO_HYPOXIA
CREBBP	CREB binding protein (Rubinstein-Taybi syndrome)																								RESPONSE_TO_HYPOXIA
CLDN3	claudin 3																								RESPONSE_TO_HYPOXIA
APH1A	anterior pharynx defective 1 homolog A (C. elegans)																									AMYLOID_PRECURSOR_PROTEIN_METABOLIC_PROCESS									POSITIVE_REGULATION_OF_CATALYTIC_ACTIVITY												GLYCOPROTEIN_CATABOLIC_PROCESS
NCSTN	nicastrin																									AMYLOID_PRECURSOR_PROTEIN_METABOLIC_PROCESS									POSITIVE_REGULATION_OF_CATALYTIC_ACTIVITY												GLYCOPROTEIN_CATABOLIC_PROCESS
PSENEN	presenilin enhancer 2 homolog (C. elegans)																									AMYLOID_PRECURSOR_PROTEIN_METABOLIC_PROCESS									POSITIVE_REGULATION_OF_CATALYTIC_ACTIVITY												GLYCOPROTEIN_CATABOLIC_PROCESS
BACE2	beta-site APP-cleaving enzyme 2																									AMYLOID_PRECURSOR_PROTEIN_METABOLIC_PROCESS
GRM5	glutamate receptor, metabotropic 5																												TRANSMISSION_OF_NERVE_IMPULSE			SYNAPTIC_TRANSMISSION					SECOND_MESSENGER_MEDIATED_SIGNALING			CELL_CELL_SIGNALING
GAD1	glutamate decarboxylase 1 (brain, 67kDa)																												TRANSMISSION_OF_NERVE_IMPULSE			SYNAPTIC_TRANSMISSION								CELL_CELL_SIGNALING
GAD2	glutamate decarboxylase 2 (pancreatic islets and brain, 65kDa)																												TRANSMISSION_OF_NERVE_IMPULSE			SYNAPTIC_TRANSMISSION								CELL_CELL_SIGNALING
GRIK1	glutamate receptor, ionotropic, kainate 1																												TRANSMISSION_OF_NERVE_IMPULSE			SYNAPTIC_TRANSMISSION								CELL_CELL_SIGNALING
GRIN2A	glutamate receptor, ionotropic, N-methyl D-aspartate 2A																												TRANSMISSION_OF_NERVE_IMPULSE			SYNAPTIC_TRANSMISSION								CELL_CELL_SIGNALING
GRIN2B	glutamate receptor, ionotropic, N-methyl D-aspartate 2B																												TRANSMISSION_OF_NERVE_IMPULSE			SYNAPTIC_TRANSMISSION								CELL_CELL_SIGNALING
DRD4	dopamine receptor D4																												TRANSMISSION_OF_NERVE_IMPULSE			SYNAPTIC_TRANSMISSION								CELL_CELL_SIGNALING
GRM1	glutamate receptor, metabotropic 1																												TRANSMISSION_OF_NERVE_IMPULSE			SYNAPTIC_TRANSMISSION								CELL_CELL_SIGNALING
HTR2A	5-hydroxytryptamine (serotonin) receptor 2A																												TRANSMISSION_OF_NERVE_IMPULSE			SYNAPTIC_TRANSMISSION								CELL_CELL_SIGNALING
ATXN3	ataxin 3																												TRANSMISSION_OF_NERVE_IMPULSE			SYNAPTIC_TRANSMISSION								CELL_CELL_SIGNALING
SLC1A2	solute carrier family 1 (glial high affinity glutamate transporter), member 2																												TRANSMISSION_OF_NERVE_IMPULSE			SYNAPTIC_TRANSMISSION								CELL_CELL_SIGNALING
SLC6A2	solute carrier family 6 (neurotransmitter transporter, noradrenalin), member 2																												TRANSMISSION_OF_NERVE_IMPULSE			SYNAPTIC_TRANSMISSION								CELL_CELL_SIGNALING
HTR3A	5-hydroxytryptamine (serotonin) receptor 3A																												TRANSMISSION_OF_NERVE_IMPULSE			SYNAPTIC_TRANSMISSION								CELL_CELL_SIGNALING
APBA1	amyloid beta (A4) precursor protein-binding, family A, member 1 (X11)																												TRANSMISSION_OF_NERVE_IMPULSE			SYNAPTIC_TRANSMISSION								CELL_CELL_SIGNALING
NPTX1	neuronal pentraxin I																												TRANSMISSION_OF_NERVE_IMPULSE			SYNAPTIC_TRANSMISSION								CELL_CELL_SIGNALING
KCNQ2	potassium voltage-gated channel, KQT-like subfamily, member 2																												TRANSMISSION_OF_NERVE_IMPULSE			SYNAPTIC_TRANSMISSION								CELL_CELL_SIGNALING
CBLN1	cerebellin 1 precursor																												TRANSMISSION_OF_NERVE_IMPULSE			SYNAPTIC_TRANSMISSION								CELL_CELL_SIGNALING
KCNA1	potassium voltage-gated channel, shaker-related subfamily, member 1 (episodic ataxia with myokymia)																												TRANSMISSION_OF_NERVE_IMPULSE			SYNAPTIC_TRANSMISSION								CELL_CELL_SIGNALING
KCNQ3	potassium voltage-gated channel, KQT-like subfamily, member 3																												TRANSMISSION_OF_NERVE_IMPULSE			SYNAPTIC_TRANSMISSION								CELL_CELL_SIGNALING
GRIA1	glutamate receptor, ionotropic, AMPA 1																												TRANSMISSION_OF_NERVE_IMPULSE			SYNAPTIC_TRANSMISSION								CELL_CELL_SIGNALING
TAAR5	trace amine associated receptor 5																												TRANSMISSION_OF_NERVE_IMPULSE			SYNAPTIC_TRANSMISSION								CELL_CELL_SIGNALING
CACNA1B	calcium channel, voltage-dependent, L type, alpha 1B subunit																												TRANSMISSION_OF_NERVE_IMPULSE			SYNAPTIC_TRANSMISSION								CELL_CELL_SIGNALING
CNP	2',3'-cyclic nucleotide 3' phosphodiesterase																												TRANSMISSION_OF_NERVE_IMPULSE			SYNAPTIC_TRANSMISSION								CELL_CELL_SIGNALING
DBH	dopamine beta-hydroxylase (dopamine beta-monooxygenase)																												TRANSMISSION_OF_NERVE_IMPULSE			SYNAPTIC_TRANSMISSION								CELL_CELL_SIGNALING
HAP1	huntingtin-associated protein 1 (neuroan 1)																												TRANSMISSION_OF_NERVE_IMPULSE			SYNAPTIC_TRANSMISSION								CELL_CELL_SIGNALING
HCRT	hypocretin (orexin) neuropeptide precursor																												TRANSMISSION_OF_NERVE_IMPULSE			SYNAPTIC_TRANSMISSION								CELL_CELL_SIGNALING
KCNQ5	potassium voltage-gated channel, KQT-like subfamily, member 5																												TRANSMISSION_OF_NERVE_IMPULSE			SYNAPTIC_TRANSMISSION								CELL_CELL_SIGNALING
SYN1	synapsin I																												TRANSMISSION_OF_NERVE_IMPULSE			SYNAPTIC_TRANSMISSION								CELL_CELL_SIGNALING
SYN2	synapsin II																												TRANSMISSION_OF_NERVE_IMPULSE			SYNAPTIC_TRANSMISSION								CELL_CELL_SIGNALING
EIF2AK3	eukaryotic translation initiation factor 2-alpha kinase 3																																CELLULAR_RESPONSE_TO_STIMULUS
EIF2B1	eukaryotic translation initiation factor 2B, subunit 1 alpha, 26kDa																																CELLULAR_RESPONSE_TO_STIMULUS
EGFR	epidermal growth factor receptor (erythroblastic leukemia viral (v-erb-b) oncogene homolog, avian)																																		POSITIVE_REGULATION_OF_CATALYTIC_ACTIVITY		SECOND_MESSENGER_MEDIATED_SIGNALING
CHRM1	cholinergic receptor, muscarinic 1																																		POSITIVE_REGULATION_OF_CATALYTIC_ACTIVITY		SECOND_MESSENGER_MEDIATED_SIGNALING
PICK1	protein interacting with PRKCA 1																																		POSITIVE_REGULATION_OF_CATALYTIC_ACTIVITY		SECOND_MESSENGER_MEDIATED_SIGNALING
ADRA2C	adrenergic, alpha-2C-, receptor																																		POSITIVE_REGULATION_OF_CATALYTIC_ACTIVITY					CELL_CELL_SIGNALING
PPP2R4	protein phosphatase 2A, regulatory subunit B' (PR 53)																																		POSITIVE_REGULATION_OF_CATALYTIC_ACTIVITY
CCND1	cyclin D1																																		POSITIVE_REGULATION_OF_CATALYTIC_ACTIVITY
CCND3	cyclin D3																																		POSITIVE_REGULATION_OF_CATALYTIC_ACTIVITY
APOC2	apolipoprotein C-II																																		POSITIVE_REGULATION_OF_CATALYTIC_ACTIVITY
EGF	epidermal growth factor (beta-urogastrone)																																		POSITIVE_REGULATION_OF_CATALYTIC_ACTIVITY
TGFA	transforming growth factor, alpha																																		POSITIVE_REGULATION_OF_CATALYTIC_ACTIVITY
CD4	CD4 molecule																																		POSITIVE_REGULATION_OF_CATALYTIC_ACTIVITY
MDFI	MyoD family inhibitor																																		POSITIVE_REGULATION_OF_CATALYTIC_ACTIVITY
MAP3K11	mitogen-activated protein kinase kinase kinase 11																																		POSITIVE_REGULATION_OF_CATALYTIC_ACTIVITY
SHC1	SHC (Src homology 2 domain containing) transforming protein 1																																		POSITIVE_REGULATION_OF_CATALYTIC_ACTIVITY
MAP3K13	mitogen-activated protein kinase kinase kinase 13																																		POSITIVE_REGULATION_OF_CATALYTIC_ACTIVITY
MAP2K3	mitogen-activated protein kinase kinase 3																																		POSITIVE_REGULATION_OF_CATALYTIC_ACTIVITY
NMBR	neuromedin B receptor																																				SECOND_MESSENGER_MEDIATED_SIGNALING
TGFB3	transforming growth factor, beta 3																																							CELL_CELL_SIGNALING
BMP2	bone morphogenetic protein 2																																							CELL_CELL_SIGNALING
LIF	leukemia inhibitory factor (cholinergic differentiation factor)																																							CELL_CELL_SIGNALING
IL11	interleukin 11																																							CELL_CELL_SIGNALING
SCG5	secretogranin V (7B2 protein)																																							CELL_CELL_SIGNALING
SNAP25	synaptosomal-associated protein, 25kDa																																							CELL_CELL_SIGNALING
OSM	oncostatin M																																							CELL_CELL_SIGNALING
NR5A1	nuclear receptor subfamily 5, group A, member 1																																							CELL_CELL_SIGNALING
FURIN	furin (paired basic amino acid cleaving enzyme)																																							CELL_CELL_SIGNALING
PCSK5	proprotein convertase subtilisin/kexin type 5																																							CELL_CELL_SIGNALING
NRP1	neuropilin 1																																							CELL_CELL_SIGNALING
IL18	interleukin 18 (interferon-gamma-inducing factor)																																							CELL_CELL_SIGNALING
IL15	interleukin 15																																							CELL_CELL_SIGNALING
PGF	placental growth factor, vascular endothelial growth factor-related protein																																							CELL_CELL_SIGNALING
TNFRSF11A	tumor necrosis factor receptor superfamily, member 11a, NFKB activator																																							CELL_CELL_SIGNALING
TSHB	thyroid stimulating hormone, beta																																							CELL_CELL_SIGNALING
ECE2	endothelin converting enzyme 2																																							CELL_CELL_SIGNALING
MME	membrane metallo-endopeptidase (neutral endopeptidase, enkephalinase)																																							CELL_CELL_SIGNALING
PCSK6	proprotein convertase subtilisin/kexin type 6																																							CELL_CELL_SIGNALING
LHB	luteinizing hormone beta polypeptide																																							CELL_CELL_SIGNALING
GDF5	growth differentiation factor 5 (cartilage-derived morphogenetic protein-1)																																							CELL_CELL_SIGNALING
ESR2	estrogen receptor 2 (ER beta)																																							CELL_CELL_SIGNALING
GNRH1	gonadotropin-releasing hormone 1 (luteinizing-releasing hormone)																																							CELL_CELL_SIGNALING
NTF3	neurotrophin 3																																							CELL_CELL_SIGNALING
GJB1	gap junction protein, beta 1, 32kDa (connexin 32, Charcot-Marie-Tooth neuropathy, X-linked)																																							CELL_CELL_SIGNALING
AVP	arginine vasopressin (neurophysin II, antidiuretic hormone, diabetes insipidus, neurohypophyseal)																																							CELL_CELL_SIGNALING
POMC	proopiomelanocortin (adrenocorticotropin/ beta-lipotropin/ alpha-melanocyte stimulating hormone/ beta-melanocyte stimulating hormone/ beta-endorphin)																																							CELL_CELL_SIGNALING
CRB1	crumbs homolog 1 (Drosophila)																																							CELL_CELL_SIGNALING
EDN3	endothelin 3																																							CELL_CELL_SIGNALING
AR	androgen receptor (dihydrotestosterone receptor; testicular feminization; spinal and bulbar muscular atrophy; Kennedy disease)																																							CELL_CELL_SIGNALING
FGF9	fibroblast growth factor 9 (glia-activating factor)																																							CELL_CELL_SIGNALING
PGR	progesterone receptor																																							CELL_CELL_SIGNALING
TRH	thyrotropin-releasing hormone																																							CELL_CELL_SIGNALING
ADAM17	ADAM metallopeptidase domain 17 (tumor necrosis factor, alpha, converting enzyme)																																							CELL_CELL_SIGNALING
PPARA	peroxisome proliferative activated receptor, alpha																																										LIPID_TRANSPORT
APOC3	apolipoprotein C-III																																										LIPID_TRANSPORT
GOT2	glutamic-oxaloacetic transaminase 2, mitochondrial (aspartate aminotransferase 2)																																										LIPID_TRANSPORT
PSAP	prosaposin (variant Gaucher disease and variant metachromatic leukodystrophy)																																										LIPID_TRANSPORT
LDLR	low density lipoprotein receptor (familial hypercholesterolemia)																																										LIPID_TRANSPORT
TIMELESS	timeless homolog (Drosophila)																																											CIRCADIAN_RHYTHM
CLOCK	clock homolog (mouse)																																											CIRCADIAN_RHYTHM
ARNTL	aryl hydrocarbon receptor nuclear translocator-like																																											CIRCADIAN_RHYTHM
CRY1	cryptochrome 1 (photolyase-like)																																											CIRCADIAN_RHYTHM
PER2	period homolog 2 (Drosophila)																																											CIRCADIAN_RHYTHM
CD34	CD34 molecule																																													LEUKOCYTE_MIGRATION
MGEA5	meningioma expressed antigen 5 (hyaluronidase)																																														GLYCOPROTEIN_CATABOLIC_PROCESS
NGLY1	N-glycanase 1																																														GLYCOPROTEIN_CATABOLIC_PROCESS
MAPT	microtubule-associated protein tau
RNH1	ribonuclease/angiogenin inhibitor 1
KL	klotho
ZAP70	zeta-chain (TCR) associated protein kinase 70kDa
ARSB	arylsulfatase B
GAA	glucosidase, alpha; acid (Pompe disease, glycogen storage disease type II)
IL31RA	interleukin 31 receptor A
NF2	neurofibromin 2 (bilateral acoustic neuroma)
TNK2	tyrosine kinase, non-receptor, 2
UBE2D1	ubiquitin-conjugating enzyme E2D 1 (UBC4/5 homolog, yeast)
ATG7	ATG7 autophagy related 7 homolog (S. cerevisiae)
PRKCG	protein kinase C, gamma
SET	SET translocation (myeloid leukemia-associated)
CTNNB1	catenin (cadherin-associated protein), beta 1, 88kDa
HGF	hepatocyte growth factor (hepapoietin A; scatter factor)
SOD2	superoxide dismutase 2, mitochondrial
CCS	copper chaperone for superoxide dismutase
FGFR3	fibroblast growth factor receptor 3 (achondroplasia, thanatophoric dwarfism)
STAT3	signal transducer and activator of transcription 3 (acute-phase response factor)
STAT2	signal transducer and activator of transcription 2, 113kDa
STAT5A	signal transducer and activator of transcription 5A
STAT5B	signal transducer and activator of transcription 5B
GPX3	glutathione peroxidase 3 (plasma)
CD79A	CD79a molecule, immunoglobulin-associated alpha
DYRK1A	dual-specificity tyrosine-(Y)-phosphorylation regulated kinase 1A
ADAM10	ADAM metallopeptidase domain 10
IFNG	interferon, gamma
ADAMTS13	ADAM metallopeptidase with thrombospondin type 1 motif, 13
PAM	peptidylglycine alpha-amidating monooxygenase
DMD	dystrophin (muscular dystrophy, Duchenne and Becker types)
CBL	Cas-Br-M (murine) ecotropic retroviral transforming sequence
M6PR	mannose-6-phosphate receptor (cation dependent)
FOLR1	folate receptor 1 (adult)
PICALM	phosphatidylinositol binding clathrin assembly protein
LRP1B	low density lipoprotein-related protein 1B (deleted in tumors)
IGF2R	insulin-like growth factor 2 receptor
DNM1	dynamin 1
MRC1	mannose receptor, C type 1
SORL1	sortilin-related receptor, L(DLR class) A repeats-containing
FLNA	filamin A, alpha (actin binding protein 280)
TGM2	transglutaminase 2 (C polypeptide, protein-glutamine-gamma-glutamyltransferase)
CSF1	colony stimulating factor 1 (macrophage)
TIMP1	TIMP metallopeptidase inhibitor 1
MST1R	macrophage stimulating 1 receptor (c-met-related tyrosine kinase)
TGFBR1	transforming growth factor, beta receptor I (activin A receptor type II-like kinase, 53kDa)
IGF1	insulin-like growth factor 1 (somatomedin C)
CDK4	cyclin-dependent kinase 4
LRP5	low density lipoprotein receptor-related protein 5
CDC25B	cell division cycle 25B
EDN1	endothelin 1
CSF3	colony stimulating factor 3 (granulocyte)
POU3F2	POU domain, class 3, transcription factor 2
PRTN3	proteinase 3 (serine proteinase, neutrophil, Wegener granulomatosis autoantigen)
REG1A	regenerating islet-derived 1 alpha (pancreatic stone protein, pancreatic thread protein)
TGFBR2	transforming growth factor, beta receptor II (70/80kDa)
PTGER3	prostaglandin E receptor 3 (subtype EP3)
NRTN	neurturin
DPYSL5	dihydropyrimidinase-like 5
FEZ2	fasciculation and elongation protein zeta 2 (zygin II)
NRCAM	neuronal cell adhesion molecule
FARP2	FERM, RhoGEF and pleckstrin domain protein 2
PRL	prolactin
ACLY	ATP citrate lyase
ACO1	aconitase 1, soluble
FH	fumarate hydratase
IDH1	isocitrate dehydrogenase 1 (NADP+), soluble
DLL1	delta-like 1 (Drosophila)
HOMER3	homer homolog 3 (Drosophila)
GRIA4	glutamate receptor, ionotrophic, AMPA 4
GRIN2C	glutamate receptor, ionotropic, N-methyl D-aspartate 2C
NCL	nucleolin
CXCR6	chemokine (C-X-C motif) receptor 6
FSHR	follicle stimulating hormone receptor
OPN1MW	opsin 1 (cone pigments), medium-wave-sensitive (color blindness, deutan)
MAS1	MAS1 oncogene
GRP	gastrin-releasing peptide
C3	complement component 3
ENPP2	ectonucleotide pyrophosphatase/phosphodiesterase 2 (autotaxin)
GPR1	G protein-coupled receptor 1
GPR15	G protein-coupled receptor 15
GRPR	gastrin-releasing peptide receptor
OXGR1	oxoglutarate (alpha-ketoglutarate) receptor 1
PIK3CG	phosphoinositide-3-kinase, catalytic, gamma polypeptide
PTGER1	prostaglandin E receptor 1 (subtype EP1), 42kDa
RAPGEF4	Rap guanine nucleotide exchange factor (GEF) 4
TAAR6	trace amine associated receptor 6
TRHR	thyrotropin-releasing hormone receptor
UCN	urocortin
LIMS1	LIM and senescent cell antigen-like domains 1
TLR4	toll-like receptor 4
TPPP	-
MMP9	matrix metallopeptidase 9 (gelatinase B, 92kDa gelatinase, 92kDa type IV collagenase)
GLA	galactosidase, alpha
LYST	lysosomal trafficking regulator
LPL	lipoprotein lipase
VAPB	VAMP (vesicle-associated membrane protein)-associated protein B and C
ATF6	activating transcription factor 6
APEX1	APEX nuclease (multifunctional DNA repair enzyme) 1
MPG	N-methylpurine-DNA glycosylase
POLG	polymerase (DNA directed), gamma
SMUG1	single-strand-selective monofunctional uracil-DNA glycosylase 1
UNG	uracil-DNA glycosylase
S100A7	S100 calcium binding protein A7
SUMO1	SMT3 suppressor of mif two 3 homolog 1 (S. cerevisiae)
SQSTM1	sequestosome 1
HTRA2	HtrA serine peptidase 2
PRDX6	peroxiredoxin 6
DUSP1	dual specificity phosphatase 1
PRNP	prion protein (p27-30) (Creutzfeldt-Jakob disease, Gerstmann-Strausler-Scheinker syndrome, fatal familial insomnia)
HSPE1	heat shock 10kDa protein 1 (chaperonin 10)
DNAJB1	DnaJ (Hsp40) homolog, subfamily B, member 1
LIG4	ligase IV, DNA, ATP-dependent
ATM	ataxia telangiectasia mutated (includes complementation groups A, C and D)
ATF4	activating transcription factor 4 (tax-responsive enhancer element B67)
MAPK9	mitogen-activated protein kinase 9
MRE11A	MRE11 meiotic recombination 11 homolog A (S. cerevisiae)
RAD50	RAD50 homolog (S. cerevisiae)
PARP1	poly (ADP-ribose) polymerase family, member 1
CCNA2	cyclin A2
PINK1	PTEN induced putative kinase 1
MAPK13	mitogen-activated protein kinase 13
MAP2K6	mitogen-activated protein kinase kinase 6
FANCC	Fanconi anemia, complementation group C
CSNK1D	casein kinase 1, delta
POLI	polymerase (DNA directed) iota
STIP1	stress-induced-phosphoprotein 1 (Hsp70/Hsp90-organizing protein)
CTBP1	C-terminal binding protein 1
INS	insulin
SMAD2	SMAD, mothers against DPP homolog 2 (Drosophila)
KLF4	Kruppel-like factor 4 (gut)
MGP	matrix Gla protein
OSTF1	osteoclast stimulating factor 1
STATH	statherin
HCFC1	host cell factor C1 (VP16-accessory protein)
SMG1	-
ID1	inhibitor of DNA binding 1, dominant negative helix-loop-helix protein
EDA	ectodysplasin A
SLC19A1	solute carrier family 19 (folate transporter), member 1
SLC22A5	solute carrier family 22 (organic cation transporter), member 5
ITGB1	integrin, beta 1 (fibronectin receptor, beta polypeptide, antigen CD29 includes MDF2, MSK12)
TYROBP	TYRO protein tyrosine kinase binding protein
PRF1	perforin 1 (pore forming protein)
GNLY	granulysin
HLA-G	HLA-G histocompatibility antigen, class I, G
ITK	IL2-inducible T-cell kinase
NCF1	neutrophil cytosolic factor 1, (chronic granulomatous disease, autosomal 1)
NCF2	neutrophil cytosolic factor 2 (65kDa, chronic granulomatous disease, autosomal 2)
IL18BP	interleukin 18 binding protein
CTSG	cathepsin G
CTSS	cathepsin S
BACE1	beta-site APP-cleaving enzyme 1
NPLOC4	nuclear protein localization 4 homolog (S. cerevisiae)
CTRL	chymotrypsin-like
PGC	progastricsin (pepsinogen C)
VHL	von Hippel-Lindau tumor suppressor
PARK2	Parkinson disease (autosomal recessive, juvenile) 2, parkin
CASP1	caspase 1, apoptosis-related cysteine peptidase (interleukin 1, beta, convertase)
UFD1L	ubiquitin fusion degradation 1 like (yeast)
IDE	insulin-degrading enzyme
OLR1	oxidised low density lipoprotein (lectin-like) receptor 1
UBE2D2	ubiquitin-conjugating enzyme E2D 2 (UBC4/5 homolog, yeast)
UBE2L3	ubiquitin-conjugating enzyme E2L 3
BLMH	bleomycin hydrolase
CTSH	cathepsin H
CTSK	cathepsin K (pycnodysostosis)
CTSO	cathepsin O
MMP1	matrix metallopeptidase 1 (interstitial collagenase)
MMP12	matrix metallopeptidase 12 (macrophage elastase)
MMP14	matrix metallopeptidase 14 (membrane-inserted)
MMP2	matrix metallopeptidase 2 (gelatinase A, 72kDa gelatinase, 72kDa type IV collagenase)
MMP3	matrix metallopeptidase 3 (stromelysin 1, progelatinase)
MMP7	matrix metallopeptidase 7 (matrilysin, uterine)
PITRM1	pitrilysin metallopeptidase 1
PREP	prolyl endopeptidase
GAB1	GRB2-associated binding protein 1
EPS8	epidermal growth factor receptor pathway substrate 8
SLC2A5	solute carrier family 2 (facilitated glucose/fructose transporter), member 5
GH1	growth hormone 1
PPBP	pro-platelet basic protein (chemokine (C-X-C motif) ligand 7)
SLC2A1	solute carrier family 2 (facilitated glucose transporter), member 1
SLC2A3	solute carrier family 2 (facilitated glucose transporter), member 3
SLC5A1	solute carrier family 5 (sodium/glucose cotransporter), member 1
TBX1	T-box 1
MGAM	maltase-glucoamylase (alpha-glucosidase)
EPM2A	epilepsy, progressive myoclonus type 2A, Lafora disease (laforin)
CHIT1	chitinase 1 (chitotriosidase)
ALDOA	aldolase A, fructose-bisphosphate
PGLS	6-phosphogluconolactonase
PFKFB1	6-phosphofructo-2-kinase/fructose-2,6-biphosphatase 1
GNS	glucosamine (N-acetyl)-6-sulfatase (Sanfilippo disease IIID)
GUSB	glucuronidase, beta
CNBP	CCHC-type zinc finger, nucleic acid binding protein
DHCR7	7-dehydrocholesterol reductase
CYP11A1	cytochrome P450, family 11, subfamily A, polypeptide 1
CYP19A1	cytochrome P450, family 19, subfamily A, polypeptide 1
SCP2	sterol carrier protein 2
HMGCR	3-hydroxy-3-methylglutaryl-Coenzyme A reductase
CD2AP	CD2-associated protein
P4HB	procollagen-proline, 2-oxoglutarate 4-dioxygenase (proline 4-hydroxylase), beta polypeptide
AMBP	alpha-1-microglobulin/bikunin precursor
MAPK8IP1	mitogen-activated protein kinase 8 interacting protein 1
CFP	complement factor properdin
HP	haptoglobin
LIPE	lipase, hormone-sensitive
SCN11A	sodium channel, voltage-gated, type XI, alpha
ABCB1	ATP-binding cassette, sub-family B (MDR/TAP), member 1
ABCC1	ATP-binding cassette, sub-family C (CFTR/MRP), member 1
ABCG2	ATP-binding cassette, sub-family G (WHITE), member 2
CYP3A4	cytochrome P450, family 3, subfamily A, polypeptide 4
ACE2	angiotensin I converting enzyme (peptidyl-dipeptidase A) 2
ENG	endoglin (Osler-Rendu-Weber syndrome 1)
ACADM	acyl-Coenzyme A dehydrogenase, C-4 to C-12 straight chain
CYP46A1	cytochrome P450, family 46, subfamily A, polypeptide 1
HSD17B6	hydroxysteroid (17-beta) dehydrogenase 6
STS	steroid sulfatase (microsomal), arylsulfatase C, isozyme S
SLC25A1	solute carrier family 25 (mitochondrial carrier; citrate transporter), member 1
TREM1	triggering receptor expressed on myeloid cells 1
LTF	lactotransferrin
TREM2	triggering receptor expressed on myeloid cells 2
CALCOCO2	calcium binding and coiled-coil domain 2
EXT1	exostoses (multiple) 1
CHST3	carbohydrate (chondroitin 6) sulfotransferase 3
HS3ST3B1	heparan sulfate (glucosamine) 3-O-sulfotransferase 3B1
HPSE	heparanase
LECT1	leukocyte cell derived chemotaxin 1
SGSH	N-sulfoglucosamine sulfohydrolase (sulfamidase)
MEA1	male-enhanced antigen 1
NNT	nicotinamide nucleotide transhydrogenase
SDHC	succinate dehydrogenase complex, subunit C, integral membrane protein, 15kDa
IRS2	insulin receptor substrate 2
G6PD	glucose-6-phosphate dehydrogenase
ALDOC	aldolase C, fructose-bisphosphate
GALT	galactose-1-phosphate uridylyltransferase
EXT2	exostoses (multiple) 2
HAS1	hyaluronan synthase 1
GNE	glucosamine (UDP-N-acetyl)-2-epimerase/N-acetylmannosamine kinase
IDUA	iduronidase, alpha-L-
MLL	myeloid/lymphoid or mixed-lineage leukemia (trithorax homolog, Drosophila)
GC	group-specific component (vitamin D binding protein)
UQCRB	ubiquinol-cytochrome c reductase binding protein
CRAT	carnitine acetyltransferase
COL18A1	collagen, type XVIII, alpha 1
APLP1	amyloid beta (A4) precursor-like protein 1
HEY1	hairy/enhancer-of-split related with YRPW motif 1
HEY2	hairy/enhancer-of-split related with YRPW motif 2
ELN	elastin (supravalvular aortic stenosis, Williams-Beuren syndrome)
STX2	syntaxin 2
AES	amino-terminal enhancer of split
DCN	decorin
ITGAX	integrin, alpha X (complement component 3 receptor 4 subunit)
MSX1	msh homeobox homolog 1 (Drosophila)
DNMT3B	DNA (cytosine-5-)-methyltransferase 3 beta
SFRS1	splicing factor, arginine/serine-rich 1 (splicing factor 2, alternate splicing factor)
SFRS6	splicing factor, arginine/serine-rich 6
SFRS9	splicing factor, arginine/serine-rich 9
NUP214	nucleoporin 214kDa
IGF2	insulin-like growth factor 2 (somatomedin A)
IRS1	insulin receptor substrate 1
SRC	v-src sarcoma (Schmidt-Ruppin A-2) viral oncogene homolog (avian)
PXN	paxillin
KDR	kinase insert domain receptor (a type III receptor tyrosine kinase)
NTRK1	neurotrophic tyrosine kinase, receptor, type 1
NTRK2	neurotrophic tyrosine kinase, receptor, type 2
NTRK3	neurotrophic tyrosine kinase, receptor, type 3
IL6R	interleukin 6 receptor
GEM	GTP binding protein overexpressed in skeletal muscle
IL27RA	interleukin 27 receptor, alpha
IL6ST	interleukin 6 signal transducer (gp130, oncostatin M receptor)
GP6	glycoprotein VI (platelet)
PTPRF	protein tyrosine phosphatase, receptor type, F
LY6E	lymphocyte antigen 6 complex, locus E
PTK2	PTK2 protein tyrosine kinase 2
TNFRSF13B	tumor necrosis factor receptor superfamily, member 13B
AKR1C3	aldo-keto reductase family 1, member C3 (3-alpha hydroxysteroid dehydrogenase, type II)
MAP2K4	mitogen-activated protein kinase kinase 4
MAPKAPK2	mitogen-activated protein kinase-activated protein kinase 2
CCNT1	cyclin T1
CCNG1	cyclin G1
EIF2AK4	eukaryotic translation initiation factor 2 alpha kinase 4
KRT7	keratin 7
PAH	phenylalanine hydroxylase
ATXN7	ataxin 7
HDAC6	histone deacetylase 6
NRG1	neuregulin 1
CCBL1	cysteine conjugate-beta lyase; cytoplasmic (glutamine transaminase K, kyneurenine aminotransferase)
CHUK	conserved helix-loop-helix ubiquitous kinase
CIITA	class II, major histocompatibility complex, transactivator
CST7	cystatin F (leukocystatin)
CTSC	cathepsin C
DPP4	dipeptidyl-peptidase 4 (CD26, adenosine deaminase complexing protein 2)
IL16	interleukin 16 (lymphocyte chemoattractant factor)
IL1R2	interleukin 1 receptor, type II
VTN	vitronectin
FSCN1	fascin homolog 1, actin-bundling protein (Strongylocentrotus purpuratus)
EPB49	erythrocyte membrane protein band 4.9 (dematin)
SERPINI1	serpin peptidase inhibitor, clade I (neuroserpin), member 1
PVRL1	poliovirus receptor-related 1 (herpesvirus entry mediator C; nectin)
CDH5	cadherin 5, type 2, VE-cadherin (vascular epithelium)
PVRL2	poliovirus receptor-related 2 (herpesvirus entry mediator B)
SLC18A2	solute carrier family 18 (vesicular monoamine), member 2
SLC18A3	solute carrier family 18 (vesicular acetylcholine), member 3
SLC6A3	solute carrier family 6 (neurotransmitter transporter, dopamine), member 3
CLN8	ceroid-lipofuscinosis, neuronal 8 (epilepsy, progressive with mental retardation)
ALDH2	aldehyde dehydrogenase 2 family (mitochondrial)
GALNT2	UDP-N-acetyl-alpha-D-galactosamine:polypeptide N-acetylgalactosaminyltransferase 2 (GalNAc-T2)
POFUT1	protein O-fucosyltransferase 1
FUT1	fucosyltransferase 1 (galactoside 2-alpha-L-fucosyltransferase, H blood group)
FUT2	fucosyltransferase 2 (secretor status included)
FUT4	fucosyltransferase 4 (alpha (1,3) fucosyltransferase, myeloid-specific)
ALK	anaplastic lymphoma kinase (Ki-1)
GAL3ST1	galactose-3-O-sulfotransferase 1
LIPA	lipase A, lysosomal acid, cholesterol esterase (Wolman disease)
MAN1C1	mannosidase, alpha, class 1C, member 1
SNAP23	synaptosomal-associated protein, 23kDa
LRP8	low density lipoprotein receptor-related protein 8, apolipoprotein e receptor
RAB5A	RAB5A, member RAS oncogene family
SYNJ1	synaptojanin 1
TSC2	tuberous sclerosis 2
PPP1R10	protein phosphatase 1, regulatory subunit 10
GSTZ1	glutathione transferase zeta 1 (maleylacetoacetate isomerase)
ASPA	aspartoacylase (Canavan disease)
TST	thiosulfate sulfurtransferase (rhodanese)
FSHB	follicle stimulating hormone, beta polypeptide
USP9X	ubiquitin specific peptidase 9, X-linked
2011-09-07	septin 7
2011-09-04	septin 4
2011-09-06	septin 6
SMPD2	sphingomyelin phosphodiesterase 2, neutral membrane (neutral sphingomyelinase)
SPTLC1	serine palmitoyltransferase, long chain base subunit 1
BAAT	bile acid Coenzyme A: amino acid N-acyltransferase (glycine N-choloyltransferase)
CHM	choroideremia (Rab escort protein 1)
TYR	tyrosinase (oculocutaneous albinism IA)
DCT	dopachrome tautomerase (dopachrome delta-isomerase, tyrosine-related protein 2)
QDPR	quinoid dihydropteridine reductase
LRPAP1	low density lipoprotein receptor-related protein associated protein 1
FKBP4	FK506 binding protein 4, 59kDa
HSPBP1	-
PDIA6	protein disulfide isomerase family A, member 6
ST13	suppression of tumorigenicity 13 (colon carcinoma) (Hsp70 interacting protein)
TBCA	tubulin-specific chaperone a
TBCE	tubulin-specific chaperone e
SIRT1	sirtuin (silent mating type information regulation 2 homolog) 1 (S. cerevisiae)
DSTN	destrin (actin depolymerizing factor)
DMPK	dystrophia myotonica-protein kinase
DES	desmin
ADI1	acireductone dioxygenase 1
SPAM1	sperm adhesion molecule 1 (PH-20 hyaluronidase, zona pellucida binding)
AKR7A2	aldo-keto reductase family 7, member A2 (aflatoxin aldehyde reductase)
B3GAT1	beta-1,3-glucuronyltransferase 1 (glucuronosyltransferase P)
CTSE	cathepsin E
SLC7A7	solute carrier family 7 (cationic amino acid transporter, y+ system), member 7
KARS	lysyl-tRNA synthetase
MTHFR	5,10-methylenetetrahydrofolate reductase (NADPH)
GGT1	gamma-glutamyltransferase 1
OTUB2	OTU domain, ubiquitin aldehyde binding 2
AKAP4	A kinase (PRKA) anchor protein 4
CALCOCO1	calcium binding and coiled-coil domain 1
CDT1	chromatin licensing and DNA replication factor 1
NEFL	neurofilament, light polypeptide 68kDa
KIF5B	kinesin family member 5B
EIF2AK2	eukaryotic translation initiation factor 2-alpha kinase 2
FABP3	fatty acid binding protein 3, muscle and heart (mammary-derived growth inhibitor)
IGFBP6	insulin-like growth factor binding protein 6
SLC25A4	solute carrier family 25 (mitochondrial carrier; adenine nucleotide translocator), member 4
TFAM	transcription factor A, mitochondrial
SULT1A1	sulfotransferase family, cytosolic, 1A, phenol-preferring, member 1
ASS1	argininosuccinate synthetase 1
PPAT	phosphoribosyl pyrophosphate amidotransferase
PAFAH1B1	platelet-activating factor acetylhydrolase, isoform Ib, alpha subunit 45kDa
ICMT	isoprenylcysteine carboxyl methyltransferase
CNGA3	cyclic nucleotide gated channel alpha 3
PNOC	prepronociceptin
GJA8	gap junction protein, alpha 8, 50kDa (connexin 50)
ALDH7A1	aldehyde dehydrogenase 7 family, member A1
CRYZ	crystallin, zeta (quinone reductase)
OAT	ornithine aminotransferase (gyrate atrophy)
TECTA	tectorin alpha
TIMM13	translocase of inner mitochondrial membrane 13 homolog (yeast)
JAK2	Janus kinase 2 (a protein tyrosine kinase)
HCK	hemopoietic cell kinase
TRPC5	transient receptor potential cation channel, subfamily C, member 5
NPAS2	neuronal PAS domain protein 2
AQP4	aquaporin 4
PHGDH	phosphoglycerate dehydrogenase
ADAM22	ADAM metallopeptidase domain 22
ATN1	atrophin 1
DCX	doublecortex; lissencephaly, X-linked (doublecortin)
DNER	-
POU3F3	POU domain, class 3, transcription factor 3
TAGLN3	transgelin 3
EPHB2	EPH receptor B2
LGI1	leucine-rich, glioma inactivated 1
PHYH	phytanoyl-CoA 2-hydroxylase
DPYSL2	dihydropyrimidinase-like 2
NRGN	neurogranin (protein kinase C substrate, RC3)
SMPD1	sphingomyelin phosphodiesterase 1, acid lysosomal (acid sphingomyelinase)
NEUROG1	neurogenin 1
ATXN10	ataxin 10
BDNF	brain-derived neurotrophic factor
CNTFR	ciliary neurotrophic factor receptor
DPYSL4	dihydropyrimidinase-like 4
DSCAM	Down syndrome cell adhesion molecule
GREM1	gremlin 1, cysteine knot superfamily, homolog (Xenopus laevis)
ITM2B	integral membrane protein 2B
L1CAM	L1 cell adhesion molecule
MSI1	musashi homolog 1 (Drosophila)
NAGLU	N-acetylglucosaminidase, alpha- (Sanfilippo disease IIIB)
NUMBL	numb homolog (Drosophila)-like
PAFAH1B3	platelet-activating factor acetylhydrolase, isoform Ib, gamma subunit 29kDa
TIMM8A	translocase of inner mitochondrial membrane 8 homolog A (yeast)
PECAM1	platelet/endothelial cell adhesion molecule (CD31 antigen)
OPCML	opioid binding protein/cell adhesion molecule-like
RYR1	ryanodine receptor 1 (skeletal)
LOXL1	lysyl oxidase-like 1
MTRR	5-methyltetrahydrofolate-homocysteine methyltransferase reductase
POR	P450 (cytochrome) oxidoreductase
SLC25A3	solute carrier family 25 (mitochondrial carrier; phosphate carrier), member 3
CEBPA	CCAAT/enhancer binding protein (C/EBP), alpha
ADIPOQ	adiponectin, C1Q and collagen domain containing
DLST	dihydrolipoamide S-succinyltransferase (E2 component of 2-oxo-glutarate complex)
GBE1	glucan (1,4-alpha-), branching enzyme 1 (glycogen branching enzyme, Andersen disease, glycogen storage disease type IV)
OGDH	oxoglutarate (alpha-ketoglutarate) dehydrogenase (lipoamide)
DBN1	drebrin 1
PIN1	protein (peptidylprolyl cis/trans isomerase) NIMA-interacting 1
FBN1	fibrillin 1
MUC5AC	mucin 5AC, oligomeric mucus/gel-forming
CFTR	cystic fibrosis transmembrane conductance regulator (ATP-binding cassette sub-family C, member 7)
FBL	fibrillarin
RICTOR	-
KIAA1217	KIAA1217
NT5M	5',3'-nucleotidase, mitochondrial
PRPF6	PRP6 pre-mRNA processing factor 6 homolog (S. cerevisiae)
SP1	Sp1 transcription factor
PARK7	Parkinson disease (autosomal recessive, early onset) 7
CANT1	calcium activated nucleotidase 1
HMOX1	heme oxygenase (decycling) 1
MYD88	myeloid differentiation primary response gene (88)
PLK2	polo-like kinase 2 (Drosophila)
PPM1A	protein phosphatase 1A (formerly 2C), magnesium-dependent, alpha isoform
TRAF5	TNF receptor-associated factor 5
ICK	intestinal cell (MAK-like) kinase
ABR	active BCR-related gene
VAV3	vav 3 oncogene
NFATC1	nuclear factor of activated T-cells, cytoplasmic, calcineurin-dependent 1
EFS	embryonal Fyn-associated substrate
FKBP8	FK506 binding protein 8, 38kDa
YWHAE	tyrosine 3-monooxygenase/tryptophan 5-monooxygenase activation protein, epsilon polypeptide
PURA	purine-rich element binding protein A
FAAH	fatty acid amide hydrolase
PECI	peroxisomal D3,D2-enoyl-CoA isomerase
FBLN5	fibulin 5
CLDN5	claudin 5 (transmembrane protein deleted in velocardiofacial syndrome)
CTNNA3	catenin (cadherin-associated protein), alpha 3
XRCC5	X-ray repair complementing defective repair in Chinese hamster cells 5 (double-strand-break rejoining; Ku autoantigen, 80kDa)
TNFRSF11B	tumor necrosis factor receptor superfamily, member 11b (osteoprotegerin)
ANXA2	annexin A2
DLL3	delta-like 3 (Drosophila)
ETS2	v-ets erythroblastosis virus E26 oncogene homolog 2 (avian)
MATN3	matrilin 3
ATXN1	ataxin 1
FBXW7	F-box and WD-40 domain protein 7 (archipelago homolog, Drosophila)
ISG15	ISG15 ubiquitin-like modifier
UCHL1	ubiquitin carboxyl-terminal esterase L1 (ubiquitin thiolesterase)
DAG1	dystroglycan 1 (dystrophin-associated glycoprotein 1)
SKAP2	src kinase associated phosphoprotein 2
TJP1	tight junction protein 1 (zona occludens 1)
EPRS	glutamyl-prolyl-tRNA synthetase
OCLN	occludin
TCAP	titin-cap (telethonin)
IFT88	intraflagellar transport 88 homolog (Chlamydomonas)
DNALI1	dynein, axonemal, light intermediate chain 1
IMPA1	inositol(myo)-1(or 4)-monophosphatase 1
PIK3C2A	phosphoinositide-3-kinase, class 2, alpha polypeptide
PLA2G6	phospholipase A2, group VI (cytosolic, calcium-independent)
SSB	Sjogren syndrome antigen B (autoantigen La)
NFATC2	nuclear factor of activated T-cells, cytoplasmic, calcineurin-dependent 2
EGR1	early growth response 1
PCNT	pericentrin (kendrin)
SLC17A7	solute carrier family 17 (sodium-dependent inorganic phosphate cotransporter), member 7
SLC17A5	solute carrier family 17 (anion/sugar transporter), member 5
HOXB2	homeobox B2
MEOX2	mesenchyme homeobox 2
DYSF	dysferlin, limb girdle muscular dystrophy 2B (autosomal recessive)
LPA	lipoprotein, Lp(a)
MYOT	myotilin
NOS1	nitric oxide synthase 1 (neuronal)
SERPING1	serpin peptidase inhibitor, clade G (C1 inhibitor), member 1, (angioedema, hereditary)
ATXN2	ataxin 2
FABP5	fatty acid binding protein 5 (psoriasis-associated)
KLK7	kallikrein 7 (chymotryptic, stratum corneum)
KRT31	keratin 31
TFAP2A	transcription factor AP-2 alpha (activating enhancer binding protein 2 alpha)
CDK9	cyclin-dependent kinase 9 (CDC2-related kinase)
TBP	TATA box binding protein
MECP2	methyl CpG binding protein 2 (Rett syndrome)
ELK3	ELK3, ETS-domain protein (SRF accessory protein 2)
VDR	vitamin D (1,25- dihydroxyvitamin D3) receptor
NR1H2	nuclear receptor subfamily 1, group H, member 2
AGPS	alkylglycerone phosphate synthase
ERG	v-ets erythroblastosis virus E26 oncogene homolog (avian)
FES	feline sarcoma oncogene
PRKD1	protein kinase D1
PRKG1	protein kinase, cGMP-dependent, type I
CAMK1	calcium/calmodulin-dependent protein kinase I
LTK	leukocyte tyrosine kinase
BCR	breakpoint cluster region
MAPK3	mitogen-activated protein kinase 3
MYLK	myosin, light chain kinase
PRKCD	protein kinase C, delta
POLB	polymerase (DNA directed), beta
POLG2	polymerase (DNA directed), gamma 2, accessory subunit
COPE	coatomer protein complex, subunit epsilon
SPTBN2	spectrin, beta, non-erythrocytic 2
DUSP3	dual specificity phosphatase 3 (vaccinia virus phosphatase VH1-related)
PTPN4	protein tyrosine phosphatase, non-receptor type 4 (megakaryocyte)
PTPN5	protein tyrosine phosphatase, non-receptor type 5 (striatum-enriched)
LRP1	low density lipoprotein-related protein 1 (alpha-2-macroglobulin receptor)
RPS27	ribosomal protein S27 (metallopanstimulin 1)
ERBB4	v-erb-a erythroblastic leukemia viral oncogene homolog 4 (avian)
KITLG	KIT ligand
BIN1	bridging integrator 1
PCNA	proliferating cell nuclear antigen
RAPGEF3	Rap guanine nucleotide exchange factor (GEF) 3
MTM1	myotubularin 1
SGCG	sarcoglycan, gamma (35kDa dystrophin-associated glycoprotein)
TAGLN	transgelin
DUT	dUTP pyrophosphatase
DST	dystonin
SREBF2	sterol regulatory element binding transcription factor 2
ACOT7	acyl-CoA thioesterase 7
APOC1	apolipoprotein C-I
APOD	apolipoprotein D
APOL1	apolipoprotein L, 1
CH25H	cholesterol 25-hydroxylase
PLTP	phospholipid transfer protein
FGF1	fibroblast growth factor 1 (acidic)
POU5F1	POU domain, class 5, transcription factor 1
CPM	carboxypeptidase M
CST6	cystatin E/M
GPC3	glypican 3
MAB21L1	mab-21-like 1 (C. elegans)
MLXIPL	MLX interacting protein-like
NOTCH3	Notch homolog 3 (Drosophila)
TH	tyrosine hydroxylase
TARDBP	TAR DNA binding protein
SMARCAL1	SWI/SNF related, matrix associated, actin dependent regulator of chromatin, subfamily a-like 1
NT5E	5'-nucleotidase, ecto (CD73)
KCNA4	potassium voltage-gated channel, shaker-related subfamily, member 4
KCNA6	potassium voltage-gated channel, shaker-related subfamily, member 6
KCNC3	potassium voltage-gated channel, Shaw-related subfamily, member 3
SFRS11	splicing factor, arginine/serine-rich 11
RNPS1	RNA binding protein S1, serine-rich domain
PPAN	peter pan homolog (Drosophila)
SNRPN	small nuclear ribonucleoprotein polypeptide N
NOX1	NADPH oxidase 1
UCP1	uncoupling protein 1 (mitochondrial, proton carrier)
UCP2	uncoupling protein 2 (mitochondrial, proton carrier)
KRT20	keratin 20
KCNIP3	Kv channel interacting protein 3, calsenilin
TCF7L2	transcription factor 7-like 2 (T-cell specific, HMG-box)
NR3C1	nuclear receptor subfamily 3, group C, member 1 (glucocorticoid receptor)
ADRBK1	adrenergic, beta, receptor kinase 1
ADRBK2	adrenergic, beta, receptor kinase 2
ALCAM	activated leukocyte cell adhesion molecule
ANGPT1	angiopoietin 1
CCK	cholecystokinin
CD226	CD226 molecule
CHL1	cell adhesion molecule with homology to L1CAM (close homolog of L1)
CHRNA3	cholinergic receptor, nicotinic, alpha 3
CREB1	cAMP responsive element binding protein 1
EPHA4	EPH receptor A4
ESR1	estrogen receptor 1
GABRA5	gamma-aminobutyric acid (GABA) A receptor, alpha 5
GDI1	GDP dissociation inhibitor 1
GIP	gastric inhibitory polypeptide
GNG12	guanine nucleotide binding protein (G protein), gamma 12
HINT1	histidine triad nucleotide binding protein 1
IGFBP1	insulin-like growth factor binding protein 1
INPP5D	inositol polyphosphate-5-phosphatase, 145kDa
KIT	v-kit Hardy-Zuckerman 4 feline sarcoma viral oncogene homolog
NEDD9	neural precursor cell expressed, developmentally down-regulated 9
NR2F1	nuclear receptor subfamily 2, group F, member 1
NR3C2	nuclear receptor subfamily 3, group C, member 2
NR4A1	nuclear receptor subfamily 4, group A, member 1
OXT	oxytocin, prepro- (neurophysin I)
PDE4A	phosphodiesterase 4A, cAMP-specific (phosphodiesterase E2 dunce homolog, Drosophila)
PDGFRB	platelet-derived growth factor receptor, beta polypeptide
PENK	proenkephalin
PTPN1	protein tyrosine phosphatase, non-receptor type 1
PTPN11	protein tyrosine phosphatase, non-receptor type 11 (Noonan syndrome 1)
RAC2	ras-related C3 botulinum toxin substrate 2 (rho family, small GTP binding protein Rac2)
SRF	serum response factor (c-fos serum response element-binding transcription factor)
TMEM11	transmembrane protein 11
TNFRSF10A	tumor necrosis factor receptor superfamily, member 10a
TNFRSF10C	tumor necrosis factor receptor superfamily, member 10c, decoy without an intracellular domain
TYRO3	TYRO3 protein tyrosine kinase
ADAM28	ADAM metallopeptidase domain 28
SERPINA5	serpin peptidase inhibitor, clade A (alpha-1 antiproteinase, antitrypsin), member 5
SPAG9	sperm associated antigen 9
RPS2	ribosomal protein S2
LOX	lysyl oxidase
QPCT	glutaminyl-peptide cyclotransferase (glutaminyl cyclase)
ACRV1	acrosomal vesicle protein 1
ELAVL1	ELAV (embryonic lethal, abnormal vision, Drosophila)-like 1 (Hu antigen R)
PAEP	progestagen-associated endometrial protein (placental protein 14, pregnancy-associated endometrial alpha-2-globulin, alpha uterine protein)
PCOLCE	procollagen C-endopeptidase enhancer
THBS1	thrombospondin 1
UBN1	ubinuclein 1
ABCB11	ATP-binding cassette, sub-family B (MDR/TAP), member 11
ABCB7	ATP-binding cassette, sub-family B (MDR/TAP), member 7
ABCC5	ATP-binding cassette, sub-family C (CFTR/MRP), member 5
HBB	hemoglobin, beta
SLC25A5	solute carrier family 25 (mitochondrial carrier; adenine nucleotide translocator), member 5
XK	X-linked Kx blood group (McLeod syndrome)
ATG9B	ATG9 autophagy related 9 homolog B (S. cerevisiae)
GOLGB1	golgi autoantigen, golgin subfamily b, macrogolgin (with transmembrane signal), 1
MAP1LC3A	microtubule-associated protein 1 light chain 3 alpha
INTS12	integrator complex subunit 12
L2HGDH	L-2-hydroxyglutarate dehydrogenase
NR1D2	nuclear receptor subfamily 1, group D, member 2
REST	RE1-silencing transcription factor
NFE2L2	nuclear factor (erythroid-derived 2)-like 2
NFIC	nuclear factor I/C (CCAAT-binding transcription factor)
PIR	pirin (iron-binding nuclear protein)
THRA	thyroid hormone receptor, alpha (erythroblastic leukemia viral (v-erb-a) oncogene homolog, avian)
ATIC	5-aminoimidazole-4-carboxamide ribonucleotide formyltransferase/IMP cyclohydrolase
OAS1	2',5'-oligoadenylate synthetase 1, 40/46kDa
TK2	thymidine kinase 2, mitochondrial
A2M	alpha-2-macroglobulin
AAAS	achalasia, adrenocortical insufficiency, alacrimia (Allgrove, triple-A)
AADAT	aminoadipate aminotransferase
ABCA7	ATP-binding cassette, sub-family A (ABC1), member 7
ABCB10	ATP-binding cassette, sub-family B (MDR/TAP), member 10
ABCC4	ATP-binding cassette, sub-family C (CFTR/MRP), member 4
ABCG5	ATP-binding cassette, sub-family G (WHITE), member 5 (sterolin 1)
ACACB	acetyl-Coenzyme A carboxylase beta
ACAT1	acetyl-Coenzyme A acetyltransferase 1 (acetoacetyl Coenzyme A thiolase)
ACLS	acrocallosal syndrome
ACP2	acid phosphatase 2, lysosomal
ACSM1	acyl-CoA synthetase medium-chain family member 1
ACSS2	acyl-CoA synthetase short-chain family member 2
ACTB	actin, beta
AD5	Alzheimer disease 5
AD8	-
ADA	adenosine deaminase
ADAMTS2	ADAM metallopeptidase with thrombospondin type 1 motif, 2
ADCY1	adenylate cyclase 1 (brain)
ADCY2	adenylate cyclase 2 (brain)
ADCY4	adenylate cyclase 4
ADCY5	adenylate cyclase 5
ADD3	adducin 3 (gamma)
ADFN	albinism-deafness syndrome
ADNP	activity-dependent neuroprotector
AFM	afamin
AFP	alpha-fetoprotein
AICDA	activation-induced cytidine deaminase
AKAP13	A kinase (PRKA) anchor protein 13
AKR7A3	aldo-keto reductase family 7, member A3 (aflatoxin aldehyde reductase)
ALDH16A1	aldehyde dehydrogenase 16 family, member A1
ALOX5	arachidonate 5-lipoxygenase
ALPL	alkaline phosphatase, liver/bone/kidney
ALSFTD	-
AMACR	alpha-methylacyl-CoA racemase
AMY1A	amylase, alpha 1A; salivary
AMY2A	amylase, alpha 2A; pancreatic
ANC	-
ANGPT4	angiopoietin 4
ANIB1	aneurysm, intracranial berry 1
ANPEP	alanyl (membrane) aminopeptidase (aminopeptidase N, aminopeptidase M, microsomal aminopeptidase, CD13, p150)
AP2B1	adaptor-related protein complex 2, beta 1 subunit
APEH	N-acylaminoacyl-peptide hydrolase
APLP2	amyloid beta (A4) precursor-like protein 2
APOB	apolipoprotein B (including Ag(x) antigen)
APOH	apolipoprotein H (beta-2-glycoprotein I)
ARD1A	ARD1 homolog A, N-acetyltransferase (S. cerevisiae)
ARHGEF16	Rho guanine exchange factor (GEF) 16
ARNT	aryl hydrocarbon receptor nuclear translocator
ARSA	arylsulfatase A
ASPM	asp (abnormal spindle) homolog, microcephaly associated (Drosophila)
ASPN	asporin (LRR class 1)
ASPSCR1	alveolar soft part sarcoma chromosome region, candidate 1
ATG10	ATG10 autophagy related 10 homolog (S. cerevisiae)
ATG5	ATG5 autophagy related 5 homolog (S. cerevisiae)
ATP13A2	ATPase type 13A2
ATP6V0E2	ATPase, H+ transporting V0 subunit e2
ATPAF2	ATP synthase mitochondrial F1 complex assembly factor 2
AZGP1	alpha-2-glycoprotein 1, zinc
B2M	beta-2-microglobulin
BAG3	BCL2-associated athanogene 3
BANK1	B-cell scaffold protein with ankyrin repeats 1
BAS	-
BBS2	Bardet-Biedl syndrome 2
BCHE	butyrylcholinesterase
BCYRN1	brain cytoplasmic RNA 1, Bc1 analog (mouse)
BDNFOS	brain-derived neurotrophic factor opposite strand
BFSP1	beaded filament structural protein 1, filensin
BGN	biglycan
BMPER	BMP binding endothelial regulator
BP2	-
C19ORF10	chromosome 19 open reading frame 10
C1ORF107	chromosome 1 open reading frame 107
C1ORF49	chromosome 1 open reading frame 49
C1ORF9	chromosome 1 open reading frame 9
C1QB	complement component 1, q subcomponent, B chain
C1S	complement component 1, s subcomponent
C21ORF124	chromosome 21 open reading frame 124
C3ORF18	chromosome 3 open reading frame 18
C3ORF57	chromosome 3 open reading frame 57
C3ORF60	chromosome 3 open reading frame 60
C4A	complement component 4A (Rodgers blood group)
C4B	complement component 4B (Childo blood group)
C6ORF15	chromosome 6 open reading frame 15
CA1	carbonic anhydrase I
CA2	carbonic anhydrase II
CA3	carbonic anhydrase III, muscle specific
CABIN1	-
CALB1	calbindin 1, 28kDa
CALB2	calbindin 2, 29kDa (calretinin)
CALM1	calmodulin 1 (phosphorylase kinase, delta)
CALU	calumenin
CAMK2G	calcium/calmodulin-dependent protein kinase (CaM kinase) II gamma
CAPN10	calpain 10
CAPN2	calpain 2, (m/II) large subunit
CASK	calcium/calmodulin-dependent serine protein kinase (MAGUK family)
CAST	calpastatin
CAT	catalase
CAV3	caveolin 3
CBR1	carbonyl reductase 1
CBS	cystathionine-beta-synthase
CCDC62	coiled-coil domain containing 62
CCIN	calicin
CCL4L2	chemokine (C-C motif) ligand 4-like 2
CCNB1	cyclin B1
CD163	CD163 molecule
CD200	CD200 molecule
CD44	CD44 molecule (Indian blood group)
CD46	CD46 molecule, complement regulatory protein
CD58	CD58 molecule
CD6	CD6 molecule
CD63	CD63 molecule
CD68	CD68 molecule
CD69	CD69 molecule
CD8A	CD8a molecule
CD99	CD99 molecule
CDH2	cadherin 2, type 1, N-cadherin (neuronal)
CDH3	cadherin 3, type 1, P-cadherin (placental)
CDH4	cadherin 4, type 1, R-cadherin (retinal)
CDIPT	CDP-diacylglycerol--inositol 3-phosphatidyltransferase (phosphatidylinositol synthase)
CDK5RAP2	CDK5 regulatory subunit associated protein 2
CDR1	cerebellar degeneration-related protein 1, 34kDa
CDR2	cerebellar degeneration-related protein 2, 62kDa
CDR3	-
CELSR2	cadherin, EGF LAG seven-pass G-type receptor 2 (flamingo homolog, Drosophila)
CFB	complement factor B
CFH	complement factor H
CFI	complement factor I
CHAT	choline acetyltransferase
CHDH	choline dehydrogenase
CHGB	chromogranin B (secretogranin 1)
CHI3L1	chitinase 3-like 1 (cartilage glycoprotein-39)
CHMP2B	chromatin modifying protein 2B
CHR	chromate resistance; sulfate transport
CHRDL1	chordin-like 1
CHRFAM7A	CHRNA7 (cholinergic receptor, nicotinic, alpha 7, exons 5-10) and FAM7A (family with sequence similarity 7A, exons A-E) fusion
CIMT	-
CISH	cytokine inducible SH2-containing protein
CKB	creatine kinase, brain
CKM	creatine kinase, muscle
CKMT1B	creatine kinase, mitochondrial 1B
CLINT1	clathrin interactor 1
CLN4	ceroid-lipofuscinosis, neuronal 4 (Kufs disease)
CLSTN1	calsyntenin 1
CLSTN2	calsyntenin 2
CLU	clusterin
CMM	cutaneous malignant melanoma/dysplastic nevus
CND	-
CNDP1	carnosine dipeptidase 1 (metallopeptidase M20 family)
CNSN	-
CNTF	ciliary neurotrophic factor
CNTN1	contactin 1
CNTN2	contactin 2 (axonal)
COL4A1	collagen, type IV, alpha 1
COL6A1	collagen, type VI, alpha 1
COMT	catechol-O-methyltransferase
CP20	-
CPE	carboxypeptidase E
CPS1	carbamoyl-phosphate synthetase 1, mitochondrial
CR1	complement component (3b/4b) receptor 1 (Knops blood group)
CREB3L1	cAMP responsive element binding protein 3-like 1
CRY2	cryptochrome 2 (photolyase-like)
CS	citrate synthase
CSF2	colony stimulating factor 2 (granulocyte-macrophage)
CSN1S1	casein alpha s1
CSN3	casein kappa
CST3	cystatin C (amyloid angiopathy and cerebral hemorrhage)
CSTB	cystatin B (stefin B)
CTH	cystathionase (cystathionine gamma-lyase)
CTNNA1	catenin (cadherin-associated protein), alpha 1, 102kDa
CTSD	cathepsin D (lysosomal aspartyl peptidase)
CUGBP1	CUG triplet repeat, RNA binding protein 1
CYBA	cytochrome b-245, alpha polypeptide
CYLD	cylindromatosis (turban tumor syndrome)
CYP1A2	cytochrome P450, family 1, subfamily A, polypeptide 2
CYP21A2	cytochrome P450, family 21, subfamily A, polypeptide 2
CYP26A1	cytochrome P450, family 26, subfamily A, polypeptide 1
CYP27A1	cytochrome P450, family 27, subfamily A, polypeptide 1
CYP2B6	cytochrome P450, family 2, subfamily B, polypeptide 6
CYP2C19	cytochrome P450, family 2, subfamily C, polypeptide 19
CYP2C9	cytochrome P450, family 2, subfamily C, polypeptide 9
CYP2D6	cytochrome P450, family 2, subfamily D, polypeptide 6
DARC	Duffy blood group, chemokine receptor
DBI	diazepam binding inhibitor (GABA receptor modulator, acyl-Coenzyme A binding protein)
DBT	dihydrolipoamide branched chain transacylase E2
DCD	dermcidin
DCI	dodecenoyl-Coenzyme A delta isomerase (3,2 trans-enoyl-Coenzyme A isomerase)
DCTN1	dynactin 1 (p150, glued homolog, Drosophila)
DCUN1D1	DCN1, defective in cullin neddylation 1, domain containing 1 (S. cerevisiae)
DDC	dopa decarboxylase (aromatic L-amino acid decarboxylase)
DDX53	DEAD (Asp-Glu-Ala-Asp) box polypeptide 53
DDX58	DEAD (Asp-Glu-Ala-Asp) box polypeptide 58
DEC	-
DHDDS	dehydrodolichyl diphosphate synthase
DHFR	dihydrofolate reductase
DKK1	dickkopf homolog 1 (Xenopus laevis)
DLD	dihydrolipoamide dehydrogenase
DLEU2	deleted in lymphocytic leukemia, 2
DLG2	discs, large homolog 2, chapsyn-110 (Drosophila)
DNAI1	dynein, axonemal, intermediate chain 1
DNAL1	dynein, axonemal, light chain 1
DNASE1	deoxyribonuclease I
DNM2	dynamin 2
DNMBP	dynamin binding protein
DNTT	deoxynucleotidyltransferase, terminal
DOCK3	dedicator of cytokinesis 3
DPEP1	dipeptidase 1 (renal)
DPP7	dipeptidyl-peptidase 7
DPPA2	developmental pluripotency associated 2
DPYD	dihydropyrimidine dehydrogenase
DUSP26	dual specificity phosphatase 26 (putative)
EARS2	glutamyl-tRNA synthetase 2 (mitochondrial)(putative)
EBM	epidermolysis bullosa, macular type
ECE1	endothelin converting enzyme 1
EDC4	enhancer of mRNA decapping 4
EEC1	ectrodactyly, ectodermal dysplasia and cleft lip/palate syndrome 1
EED	embryonic ectoderm development
EFHD1	EF-hand domain family, member D1
EGI	epilepsy, generalized, idiopathic
EIF2C2	eukaryotic translation initiation factor 2C, 2
EIF2S1	eukaryotic translation initiation factor 2, subunit 1 alpha, 35kDa
EIF2S2	eukaryotic translation initiation factor 2, subunit 2 beta, 38kDa
EIF4A1	eukaryotic translation initiation factor 4A, isoform 1
EJM2	epilepsy, juvenile myoclonic 2
ELA2	elastase 2, neutrophil
ENAH	enabled homolog (Drosophila)
ENDOG	endonuclease G
ENO2	enolase 2 (gamma, neuronal)
ENO3	enolase 3 (beta, muscle)
ENTPD5	ectonucleoside triphosphate diphosphohydrolase 5
EPO	erythropoietin
EPOR	erythropoietin receptor
ERAS	ES cell expressed Ras
ESCO2	establishment of cohesion 1 homolog 2 (S. cerevisiae)
ESD	esterase D/formylglutathione hydrolase
ETV2	ets variant gene 2
ETV3	ets variant gene 3
EVI1	ecotropic viral integration site 1
EXTL3	exostoses (multiple)-like 3
F3	coagulation factor III (thromboplastin, tissue factor)
FABP4	fatty acid binding protein 4, adipocyte
FANCD2	Fanconi anemia, complementation group D2
FAU	Finkel-Biskis-Reilly murine sarcoma virus (FBR-MuSV) ubiquitously expressed (fox derived); ribosomal protein S30
FBF1	Fas (TNFRSF6) binding factor 1
FBLN1	fibulin 1
FCER2	Fc fragment of IgE, low affinity II, receptor for (CD23)
FEA	-
FGA	fibrinogen alpha chain
FGB	fibrinogen beta chain
FGFR2	fibroblast growth factor receptor 2 (bacteria-expressed kinase, keratinocyte growth factor receptor, craniofacial dysostosis 1, Crouzon syndrome, Pfeiffer syndrome, Jackson-Weiss syndrome)
FHL1	four and a half LIM domains 1
FLNC	filamin C, gamma (actin binding protein 280)
FMR1	fragile X mental retardation 1
FN1	fibronectin 1
FOLH1	folate hydrolase (prostate-specific membrane antigen) 1
FRAP1	FK506 binding protein 12-rapamycin associated protein 1
FREQ	frequenin homolog (Drosophila)
FUS	fusion (involved in t(12;16) in malignant liposarcoma)
FXYD5	FXYD domain containing ion transport regulator 5
G6PC	glucose-6-phosphatase, catalytic subunit
GAB2	GRB2-associated binding protein 2
GAL	galanin
GALC	galactosylceramidase
GALNS	galactosamine (N-acetyl)-6-sulfate sulfatase (Morquio syndrome, mucopolysaccharidosis type IVA)
GAN	giant axonal neuropathy (gigaxonin)
GANC	glucosidase, alpha; neutral C
GAPDH	glyceraldehyde-3-phosphate dehydrogenase
GARS	glycyl-tRNA synthetase
GART	phosphoribosylglycinamide formyltransferase, phosphoribosylglycinamide synthetase, phosphoribosylaminoimidazole synthetase
GAST	gastrin
GBA	glucosidase, beta; acid (includes glucosylceramidase)
GFAP	glial fibrillary acidic protein
GGPS1	geranylgeranyl diphosphate synthase 1
GIF	gastric intrinsic factor (vitamin B synthesis)
GLB1	galactosidase, beta 1
GLG1	golgi apparatus protein 1
GLRA3	glycine receptor, alpha 3
GLS	glutaminase
GLUL	glutamate-ammonia ligase (glutamine synthetase)
GNB2L1	guanine nucleotide binding protein (G protein), beta polypeptide 2-like 1
GNPTAB	N-acetylglucosamine-1-phosphate transferase, alpha and beta subunits
GPC1	glypican 1
GPC6	glypican 6
GPR83	G protein-coupled receptor 83
GPSC	-
GPT	glutamic-pyruvate transaminase (alanine aminotransferase)
GRHL3	grainyhead-like 3 (Drosophila)
GRIN1	glutamate receptor, ionotropic, N-methyl D-aspartate 1
GRINA	glutamate receptor, ionotropic, N-methyl D-asparate-associated protein 1 (glutamate binding)
GRN	granulin
GSK3A	glycogen synthase kinase 3 alpha
GSR	glutathione reductase
GSTO1	glutathione S-transferase omega 1
GTF2IRD1	GTF2I repeat domain containing 1
GYPE	glycophorin E
GZMM	granzyme M (lymphocyte met-ase 1)
H2AFX	H2A histone family, member X
H6PD	hexose-6-phosphate dehydrogenase (glucose 1-dehydrogenase)
HAAO	3-hydroxyanthranilate 3,4-dioxygenase
HBA1	hemoglobin, alpha 1
HBG2	hemoglobin, gamma G
HCN1	hyperpolarization activated cyclic nucleotide-gated potassium channel 1
HCST	hematopoietic cell signal transducer
HECTD2	HECT domain containing 2
HEXA	hexosaminidase A (alpha polypeptide)
HEXB	hexosaminidase B (beta polypeptide)
HLA-C	major histocompatibility complex, class I, C
HLA-DRB1	major histocompatibility complex, class II, DR beta 1
HM13	histocompatibility (minor) 13
HMBS	hydroxymethylbilane synthase
HMGN4	high mobility group nucleosomal binding domain 4
HMOX2	heme oxygenase (decycling) 2
HRNR	hornerin
HSD11B1	hydroxysteroid (11-beta) dehydrogenase 1
HSD17B13	hydroxysteroid (17-beta) dehydrogenase 13
HSD17B7	hydroxysteroid (17-beta) dehydrogenase 7
HSH2D	hematopoietic SH2 domain containing
HSPA1A	heat shock 70kDa protein 1A
HSPA5	heat shock 70kDa protein 5 (glucose-regulated protein, 78kDa)
HSPA8	heat shock 70kDa protein 8
HSPG2	heparan sulfate proteoglycan 2 (perlecan)
HTC2	hypertrichosis 2 (generalised, congenital)
IBGC1	idiopathic basal ganglia calcification 1
ICAM1	intercellular adhesion molecule 1 (CD54), human rhinovirus receptor
ICAM2	intercellular adhesion molecule 2
ICAM3	intercellular adhesion molecule 3
IDS	iduronate 2-sulfatase (Hunter syndrome)
IFIT1	interferon-induced protein with tetratricopeptide repeats 1
IFNA1	interferon, alpha 1
IFNA10	interferon, alpha 10
IFNA6	interferon, alpha 6
IFT74	intraflagellar transport 74 homolog (Chlamydomonas)
IGFBP2	insulin-like growth factor binding protein 2, 36kDa
IGHE	immunoglobulin heavy constant epsilon
IGHG3	immunoglobulin heavy constant gamma 3 (G3m marker)
IGKV1D-8	immunoglobulin kappa variable 1D-8
IGKV2-36	immunoglobulin kappa variable 2-36
IGKV2D-29	immunoglobulin kappa variable 2D-29
IGKV3-7	immunoglobulin kappa variable 3-7
IL1R1	interleukin 1 receptor, type I
IL1RN	interleukin 1 receptor antagonist
IL8RA	interleukin 8 receptor, alpha
IL8RB	interleukin 8 receptor, beta
INA	internexin neuronal intermediate filament protein, alpha
INPPL1	inositol polyphosphate phosphatase-like 1
IREB2	iron-responsive element binding protein 2
ITGA4	integrin, alpha 4 (antigen CD49D, alpha 4 subunit of VLA-4 receptor)
ITGAL	integrin, alpha L (antigen CD11A (p180), lymphocyte function-associated antigen 1; alpha polypeptide)
ITGAM	integrin, alpha M (complement component 3 receptor 3 subunit)
ITIH1	inter-alpha (globulin) inhibitor H1
ITPR1	inositol 1,4,5-triphosphate receptor, type 1
ITS	-
IV	inversus situs, viscerum
IVD	isovaleryl Coenzyme A dehydrogenase
JAG1	jagged 1 (Alagille syndrome)
JAK1	Janus kinase 1 (a protein tyrosine kinase)
JAM3	junctional adhesion molecule 3
JPH3	junctophilin 3
JUN	jun oncogene
KCNJ13	potassium inwardly-rectifying channel, subfamily J, member 13
KIAA0196	KIAA0196
KIAA1267	KIAA1267
KIDINS220	-
KIF24	kinesin family member 24
KIF2B	kinesin family member 2B
KLF6	Kruppel-like factor 6
KLK1	kallikrein 1, renal/pancreas/salivary
KLK11	kallikrein 11
KLK3	kallikrein 3, (prostate specific antigen)
KLK6	kallikrein 6 (neurosin, zyme)
KMO	kynurenine 3-monooxygenase (kynurenine 3-hydroxylase)
KYNU	kynureninase (L-kynurenine hydrolase)
LAMP1	lysosomal-associated membrane protein 1
LAMP2	lysosomal-associated membrane protein 2
LAP3	leucine aminopeptidase 3
LAPTM4A	lysosomal-associated protein transmembrane 4 alpha
LARS	leucyl-tRNA synthetase
LDB3	LIM domain binding 3
LDHA	lactate dehydrogenase A
LDHC	lactate dehydrogenase C
LEF1	lymphoid enhancer-binding factor 1
LGALS4	lectin, galactoside-binding, soluble, 4 (galectin 4)
LGMN	legumain
LIAS	lipoic acid synthetase
LIN9	lin-9 homolog (C. elegans)
LMNB1	lamin B1
LNP1	leukemia NUP98 fusion partner 1
LPAL2	lipoprotein, Lp(a)-like 2
LPHN1	latrophilin 1
LPHN2	latrophilin 2
LPO	lactoperoxidase
LRRK2	leucine-rich repeat kinase 2
LRRTM3	leucine rich repeat transmembrane neuronal 3
LSL	-
LSS	lanosterol synthase (2,3-oxidosqualene-lanosterol cyclase)
LZTS1	leucine zipper, putative tumor suppressor 1
MAA	microphthalmia or anophthalmia and associated anomalies
MAGEC2	melanoma antigen family C, 2
MAGEE1	melanoma antigen family E, 1
MANBA	mannosidase, beta A, lysosomal
MAOB	monoamine oxidase B
MAP1A	microtubule-associated protein 1A
MAP1B	microtubule-associated protein 1B
MAP2	microtubule-associated protein 2
MAP2K2	mitogen-activated protein kinase kinase 2
MAP3K14	mitogen-activated protein kinase kinase kinase 14
MAP4	microtubule-associated protein 4
MAPKAP1	mitogen-activated protein kinase associated protein 1
MARCKS	myristoylated alanine-rich protein kinase C substrate
MARVELD1	MARVEL domain containing 1
MASP2	mannan-binding lectin serine peptidase 2
MB	myoglobin
MCF2	MCF.2 cell line derived transforming sequence
MCPH1	microcephaly, primary autosomal recessive 1
MDH2	malate dehydrogenase 2, NAD (mitochondrial)
MDRV	muscular dystrophy, with rimmed vacuoles
MET	met proto-oncogene (hepatocyte growth factor receptor)
MFGE8	milk fat globule-EGF factor 8 protein
MFI2	antigen p97 (melanoma associated) identified by monoclonal antibodies 133.2 and 96.5
MIB1	mindbomb homolog 1 (Drosophila)
MIXL1	Mix1 homeobox-like 1 (Xenopus laevis)
MLC1	megalencephalic leukoencephalopathy with subcortical cysts 1
MMACHC	methylmalonic aciduria (cobalamin deficiency) cblC type, with homocystinuria
MMD	monocyte to macrophage differentiation-associated
MMS	-
MOS	v-mos Moloney murine sarcoma viral oncogene homolog
MPI	mannose phosphate isomerase
MROS	Melkersson-Rosenthal syndrome
MRPL22	mitochondrial ribosomal protein L22
MRSD	mental retardation-skeletal dysplasia
MS	multiple sclerosis
MSD	microcephaly with spastic diplegia (Paine syndrome)
MT-ATP6	mitochondrially encoded ATP synthase 6
MT4	metallothionein IV
MTDH	metadherin
MTHFD1L	methylenetetrahydrofolate dehydrogenase (NADP+ dependent) 1-like
MTHFS	5,10-methenyltetrahydrofolate synthetase (5-formyltetrahydrofolate cyclo-ligase)
MTR	5-methyltetrahydrofolate-homocysteine methyltransferase
MTX1	metaxin 1
MUC1	mucin 1, cell surface associated
MUC16	mucin 16, cell surface associated
MUT	methylmalonyl Coenzyme A mutase
MVD	mevalonate (diphospho) decarboxylase
MYBPC1	myosin binding protein C, slow type
MYH2	myosin, heavy chain 2, skeletal muscle, adult
MYOCD	myocardin
NA	neurocanthocytosis
NAT2	N-acetyltransferase 2 (arylamine N-acetyltransferase)
NCAM1	neural cell adhesion molecule 1
NCOA1	nuclear receptor coactivator 1
NDEL1	nudE nuclear distribution gene E homolog like 1 (A. nidulans)
NDUFA1	NADH dehydrogenase (ubiquinone) 1 alpha subcomplex, 1, 7.5kDa
NDUFB6	NADH dehydrogenase (ubiquinone) 1 beta subcomplex, 6, 17kDa
NDUFV1	NADH dehydrogenase (ubiquinone) flavoprotein 1, 51kDa
NEFH	neurofilament, heavy polypeptide 200kDa
NES	nestin
NGB	neuroglobin
NGFR	nerve growth factor receptor (TNFR superfamily, member 16)
NHLRC1	NHL repeat containing 1
NID1	nidogen 1
NIPA1	non imprinted in Prader-Willi/Angelman syndrome 1
NMNAT1	nicotinamide nucleotide adenylyltransferase 1
NMNAT3	nicotinamide nucleotide adenylyltransferase 3
NOS3	nitric oxide synthase 3 (endothelial cell)
NOVA2	neuro-oncological ventral antigen 2
NPAS3	neuronal PAS domain protein 3
NPEPPS	aminopeptidase puromycin sensitive
NPS	-
NPTX2	neuronal pentraxin II
NPTXR	neuronal pentraxin receptor
NR4A2	nuclear receptor subfamily 4, group A, member 2
NRM	nurim (nuclear envelope membrane protein)
NSF	N-ethylmaleimide-sensitive factor
NTS	neurotensin
NUB1	negative regulator of ubiquitin-like proteins 1
NUBP2	nucleotide binding protein 2 (MinD homolog, E. coli)
NUCB1	nucleobindin 1
OLIG2	oligodendrocyte lineage transcription factor 2
OMD	osteomodulin
OPTC	opticin
OSCAR	-
OTC	ornithine carbamoyltransferase
OXCT2	3-oxoacid CoA transferase 2
P200	p200 cell surface protein
PACS1	phosphofurin acidic cluster sorting protein 1
PADI2	peptidyl arginine deiminase, type II
PANK2	pantothenate kinase 2 (Hallervorden-Spatz syndrome)
PARK3	Parkinson disease (autosomal dominant, Lewy body) 3
PBCA	-
PCBP3	poly(rC) binding protein 3
PCSK1N	proprotein convertase subtilisin/kexin type 1 inhibitor
PCSK7	proprotein convertase subtilisin/kexin type 7
PDB1	Paget disease of bone 1
PDE1A	phosphodiesterase 1A, calmodulin-dependent
PDE3B	phosphodiesterase 3B, cGMP-inhibited
PDE4D	phosphodiesterase 4D, cAMP-specific (phosphodiesterase E3 dunce homolog, Drosophila)
PDE5A	phosphodiesterase 5A, cGMP-specific
PDGFB	platelet-derived growth factor beta polypeptide (simian sarcoma viral (v-sis) oncogene homolog)
PDLIM5	PDZ and LIM domain 5
PDR	pigment disorder, reticulate
PDYN	prodynorphin
PEBP1	phosphatidylethanolamine binding protein 1
PELI1	pellino homolog 1 (Drosophila)
PEPE	peptidase E
PER3	period homolog 3 (Drosophila)
PGAM1	phosphoglycerate mutase 1 (brain)
PGM1	phosphoglucomutase 1
PGM5	phosphoglucomutase 5
PGPEP1	pyroglutamyl-peptidase I
PHF1	PHD finger protein 1
PHF6	PHD finger protein 6
PI3	peptidase inhibitor 3, skin-derived (SKALP)
PKM2	pyruvate kinase, muscle
PKNOX1	PBX/knotted 1 homeobox 1
PLCB1	phospholipase C, beta 1 (phosphoinositide-specific)
PLEKHG4	pleckstrin homology domain containing, family G (with RhoGef domain) member 4
PLS3	plastin 3 (T isoform)
PNKD	paroxysmal nonkinesiogenic dyskinesia
PNLIP	pancreatic lipase
PNMA2	paraneoplastic antigen MA2
PNMT	phenylethanolamine N-methyltransferase
PON1	paraoxonase 1
PPA1	pyrophosphatase (inorganic) 1
PPM2C	protein phosphatase 2C, magnesium-dependent, catalytic subunit
PPP1R7	protein phosphatase 1, regulatory subunit 7
PPP2R2B	protein phosphatase 2 (formerly 2A), regulatory subunit B (PR 52), beta isoform
PPR	-
PRICKLE1	prickle homolog 1 (Drosophila)
PRND	prion protein 2 (dublet)
PROM1	prominin 1
PSAT1	phosphoserine aminotransferase 1
PSMB8	proteasome (prosome, macropain) subunit, beta type, 8 (large multifunctional peptidase 7)
PSMC1	proteasome (prosome, macropain) 26S subunit, ATPase, 1
PSMC6	proteasome (prosome, macropain) 26S subunit, ATPase, 6
PSMD9	proteasome (prosome, macropain) 26S subunit, non-ATPase, 9
PSME1	proteasome (prosome, macropain) activator subunit 1 (PA28 alpha)
PSME3	proteasome (prosome, macropain) activator subunit 3 (PA28 gamma; Ki)
PSNP2	-
PSPH	phosphoserine phosphatase
PSRC1	proline/serine-rich coiled-coil 1
PTCRA	pre T-cell antigen receptor alpha
PTER	phosphotriesterase related
PTGIS	prostaglandin I2 (prostacyclin) synthase
PTP4A2	protein tyrosine phosphatase type IVA, member 2
PYHIN1	pyrin and HIN domain family, member 1
RA24	-
RAB7B	RAB7B, member RAS oncogene family
RALGPS2	Ral GEF with PH domain and SH3 binding motif 2
RAP1GDS1	RAP1, GTP-GDP dissociation stimulator 1
RAPGEF5	Rap guanine nucleotide exchange factor (GEF) 5
RAPH1	Ras association (RalGDS/AF-6) and pleckstrin homology domains 1
RASIP1	Ras interacting protein 1
RBM23	RNA binding motif protein 23
RBM4	RNA binding motif protein 4
RBP4	retinol binding protein 4, plasma
RCN1	reticulocalbin 1, EF-hand calcium binding domain
REEP5	receptor accessory protein 5
RELN	reelin
RGSL1	regulator of G-protein signalling like 1
RMST	rhabdomyosarcoma 2 associated transcript (non-coding RNA)
RNF111	ring finger protein 111
RNF34	ring finger protein 34
RPH3A	rabphilin 3A homolog (mouse)
RPLP0	ribosomal protein, large, P0
RPS27A	ribosomal protein S27a
RPSA	ribosomal protein SA
RRM1	ribonucleotide reductase M1 polypeptide
RRM2	ribonucleotide reductase M2 polypeptide
RSPO2	R-spondin 2 homolog (Xenopus laevis)
RTN4R	reticulon 4 receptor
SACS	spastic ataxia of Charlevoix-Saguenay (sacsin)
SAGE1	sarcoma antigen 1
SCAX1	spinocerebellar ataxia, X-linked 1
SCD	stearoyl-CoA desaturase (delta-9-desaturase)
SCFV	-
SCG3	secretogranin III
SCN1A	sodium channel, voltage-gated, type I, alpha
SDC1	syndecan 1
SDC2	syndecan 2 (heparan sulfate proteoglycan 1, cell surface-associated, fibroglycan)
SDPR	serum deprivation response (phosphatidylserine binding protein)
SEL1L	sel-1 suppressor of lin-12-like (C. elegans)
SELL	selectin L (lymphocyte adhesion molecule 1)
SELP	selectin P (granule membrane protein 140kDa, antigen CD62)
SEPN1	selenoprotein N, 1
2011-09-08	septin 8
SERINC3	serine incorporator 3
SERPINA1	serpin peptidase inhibitor, clade A (alpha-1 antiproteinase, antitrypsin), member 1
SERPINA3	serpin peptidase inhibitor, clade A (alpha-1 antiproteinase, antitrypsin), member 3
SERPINA6	serpin peptidase inhibitor, clade A (alpha-1 antiproteinase, antitrypsin), member 6
SERPINB1	serpin peptidase inhibitor, clade B (ovalbumin), member 1
SERPINB3	serpin peptidase inhibitor, clade B (ovalbumin), member 3
SERPINC1	serpin peptidase inhibitor, clade C (antithrombin), member 1
SERPIND1	serpin peptidase inhibitor, clade D (heparin cofactor), member 1
SERPINE2	serpin peptidase inhibitor, clade E (nexin, plasminogen activator inhibitor type 1), member 2
SERPINF2	serpin peptidase inhibitor, clade F (alpha-2 antiplasmin, pigment epithelium derived factor), member 2
SETD1A	SET domain containing 1A
SFRS12	splicing factor, arginine/serine-rich 12
SFRS16	splicing factor, arginine/serine-rich 16
SFRS3	splicing factor, arginine/serine-rich 3
SFTPC	surfactant, pulmonary-associated protein C
SGOL1	shugoshin-like 1 (S. pombe)
SH2B3	SH2B adaptor protein 3
SHANK1	SH3 and multiple ankyrin repeat domains 1
SHANK3	SH3 and multiple ankyrin repeat domains 3
SHBG	sex hormone-binding globulin
SHC2	SHC (Src homology 2 domain containing) transforming protein 2
SIAE	sialic acid acetylesterase
SIGLEC1	sialic acid binding Ig-like lectin 1, sialoadhesin
SLC17A6	solute carrier family 17 (sodium-dependent inorganic phosphate cotransporter), member 6
SLC24A3	solute carrier family 24 (sodium/potassium/calcium exchanger), member 3
SLC25A18	solute carrier family 25 (mitochondrial carrier), member 18
SLC25A39	solute carrier family 25, member 39
SLC25A46	solute carrier family 25, member 46
SLC30A3	solute carrier family 30 (zinc transporter), member 3
SLC4A3	solute carrier family 4, anion exchanger, member 3
SLC5A3	solute carrier family 5 (inositol transporters), member 3
SLC7A11	solute carrier family 7, (cationic amino acid transporter, y+ system) member 11
SMC2	structural maintenance of chromosomes 2
SMN1	survival of motor neuron 1, telomeric
SMU1	smu-1 suppressor of mec-8 and unc-52 homolog (C. elegans)
SNAI1	snail homolog 1 (Drosophila)
SNAP91	synaptosomal-associated protein, 91kDa homolog (mouse)
SNCB	synuclein, beta
SNCG	synuclein, gamma (breast cancer-specific protein 1)
SNORD50A	small nucleolar RNA, C/D box 50A
SOD3	superoxide dismutase 3, extracellular
SORT1	sortilin 1
SOX2	SRY (sex determining region Y)-box 2
SP6	Sp6 transcription factor
SPARCL1	SPARC-like 1 (mast9, hevin)
SPAST	spastin
SPEN	spen homolog, transcriptional regulator (Drosophila)
SPG11	spastic paraplegia 11 (autosomal recessive)
SPG21	spastic paraplegia 21, maspardin (autosomal recessive, Mast syndrome)
SPG9	spastic paraplegia 9 (autosomal dominant)
SPP1	secreted phosphoprotein 1 (osteopontin, bone sialoprotein I, early T-lymphocyte activation 1)
SPPL2A	-
SPPL2B	-
SRP54	signal recognition particle 54kDa
SRRM2	serine/arginine repetitive matrix 2
SSBP1	single-stranded DNA binding protein 1
SSX5	synovial sarcoma, X breakpoint 5
ST3GAL4	ST3 beta-galactoside alpha-2,3-sialyltransferase 4
STAP2	-
STAU1	staufen, RNA binding protein, homolog 1 (Drosophila)
STH	-
STYK1	serine/threonine/tyrosine kinase 1
SULT1E1	sulfotransferase family 1E, estrogen-preferring, member 1
SUOX	sulfite oxidase
SV2A	synaptic vesicle glycoprotein 2A
SYNPO	synaptopodin
SYP	synaptophysin
TANC2	tetratricopeptide repeat, ankyrin repeat and coiled-coil containing 2
TBC1D1	TBC1 (tre-2/USP6, BUB2, cdc16) domain family, member 1
TCF23	transcription factor 23
TDGF3	teratocarcinoma-derived growth factor 3, pseudogene
TDGF4	teratocarcinoma-derived growth factor 4, pseudogene
TDO2	tryptophan 2,3-dioxygenase
TDP1	tyrosyl-DNA phosphodiesterase 1
TF	transferrin
TFE3	transcription factor binding to IGHM enhancer 3
TFRC	transferrin receptor (p90, CD71)
TG	thyroglobulin
TGDS	TDP-glucose 4,6-dehydratase
TGM7	transglutaminase 7
THAP10	THAP domain containing 10
THOP1	thimet oligopeptidase 1
TIMP2	TIMP metallopeptidase inhibitor 2
TIMP3	TIMP metallopeptidase inhibitor 3 (Sorsby fundus dystrophy, pseudoinflammatory)
TIMP4	TIMP metallopeptidase inhibitor 4
TIRAP	toll-interleukin 1 receptor (TIR) domain containing adaptor protein
TJP2	tight junction protein 2 (zona occludens 2)
TLE4	transducin-like enhancer of split 4 (E(sp1) homolog, Drosophila)
TMEFF1	transmembrane protein with EGF-like and two follistatin-like domains 1
TMEM106B	transmembrane protein 106B
TMEM147	transmembrane protein 147
TNC	tenascin C (hexabrachion)
TNFRSF1B	tumor necrosis factor receptor superfamily, member 1B
TNFRSF21	tumor necrosis factor receptor superfamily, member 21
TOM1L2	target of myb1-like 2 (chicken)
TOMM40	translocase of outer mitochondrial membrane 40 homolog (yeast)
TPH1	tryptophan hydroxylase 1 (tryptophan 5-monooxygenase)
TPI1	triosephosphate isomerase 1
TPM2	tropomyosin 2 (beta)
TPM3	tropomyosin 3
TPO	thyroid peroxidase
TREX1	three prime repair exonuclease 1
TRIM35	tripartite motif-containing 35
TRIM47	tripartite motif-containing 47
TRIM71	tripartite motif-containing 71
TRIM9	tripartite motif-containing 9
TRIT1	tRNA isopentenyltransferase 1
TRPM6	transient receptor potential cation channel, subfamily M, member 6
TRPM7	transient receptor potential cation channel, subfamily M, member 7
TTBK2	tau tubulin kinase 2
TTR	transthyretin (prealbumin, amyloidosis type I)
TUBB3	tubulin, beta 3
UBAP1	ubiquitin associated protein 1
UBAP2	ubiquitin associated protein 2
UBE2E3	ubiquitin-conjugating enzyme E2E 3 (UBC4/5 homolog, yeast)
UBQLN1	ubiquilin 1
UCHL3	ubiquitin carboxyl-terminal esterase L3 (ubiquitin thiolesterase)
UNC13A	unc-13 homolog A (C. elegans)
UNQ1887	-
UQCRQ	ubiquinol-cytochrome c reductase, complex III subunit VII, 9.5kDa
USP1	ubiquitin specific peptidase 1
USPL1	ubiquitin specific peptidase like 1
VAMP2	vesicle-associated membrane protein 2 (synaptobrevin 2)
VAULTRC2	vault RNA component 2
VCAM1	vascular cell adhesion molecule 1
VCF	velocardiofacial syndrome
VENTXP1	VENT homeobox (Xenopus laevis) pseudogene 1
VGF	VGF nerve growth factor inducible
VIM	vimentin
VIT	vitrin
VPS13A	vacuolar protein sorting 13 homolog A (S. cerevisiae)
WDFY3	WD repeat and FYVE domain containing 3
WNT10A	wingless-type MMTV integration site family, member 10A
WNT3	wingless-type MMTV integration site family, member 3
WWC1	WW, C2 and coiled-coil domain containing 1
XDH	xanthine dehydrogenase
XRCC1	X-ray repair complementing defective repair in Chinese hamster cells 1
ZBTB20	zinc finger and BTB domain containing 20
ZDHHC23	zinc finger, DHHC-type containing 23
ZMYM2	zinc finger, MYM-type 2
ZNF175	zinc finger protein 175
ZNF331	zinc finger protein 331
[truncated: 2 more columns]
