# Supplementary material for: A network model of genomic hormone interactions underlying dementia and its translational validation through serendipitous off-target effect
Source: J Transl Med. 2013 Jul 26;11:177. doi: 10.1186/1479-5876-11-177 (PMC3733613; doi:10.1186/1479-5876-11-177)
Supplement: Additional file 4 — Enrichment analysis results for each module subnetwork of DHN. Detailed results of gene set enrichment analysis for proteins of four giant components (modules) using the category of GO Biological Process. Description: Result table of GSEA GO biological process analysis on each DHN modules. [file 1479-5876-11-177-S4.xls]

## Sheet: First_Module_GSEA
Overlap Results
Collection(s):	BP
# overlaps shown:	10
# genesets in collections:	825
# genes in comparison (n):	1825
# genes in collections (N):	6032
Gene Set Name	# Genes in Gene Set (K)	Description	# Genes in Overlap (k)	k/K	p value
TRANSCRIPTION	739	Genes annotated by the GO term GO:0006350. The synthesis of either RNA on a template of DNA or DNA on a template of RNA.	331	0.4479	0
TRANSCRIPTION_DNA_DEPENDENT	624	Genes annotated by the GO term GO:0006351. The synthesis of RNA on a template of DNA.	296	0.4744	0
RNA_BIOSYNTHETIC_PROCESS	626	Genes annotated by the GO term GO:0032774. The chemical reactions and pathways resulting in the formation of RNA, ribonucleic acid, one of the two main type of nucleic acid, consisting of a long, unbranched macromolecule formed from ribonucleotides joined in 3',5'-phosphodiester linkage. Includes polymerization of ribonucleotide monomers.	297	0.4744	0
TRANSCRIPTION_FROM_RNA_POLYMERASE_II_PROMOTER	450	Genes annotated by the GO term GO:0006366. The synthesis of RNA from a DNA template by RNA polymerase II (Pol II), originating at a Pol II-specific promoter. Includes transcription of messenger RNA (mRNA) and certain small nuclear RNAs (snRNAs).	228	0.5067	0
RNA_METABOLIC_PROCESS	811	Genes annotated by the GO term GO:0016070. The chemical reactions and pathways involving RNA, ribonucleic acid, one of the two main type of nucleic acid, consisting of a long, unbranched macromolecule formed from ribonucleotides joined in 3',5'-phosphodiester linkage.	342	0.4217	6.44e-15
REGULATION_OF_TRANSCRIPTIONDNA_DEPENDENT	453	Genes annotated by the GO term GO:0006355. Any process that modulates the frequency, rate or extent of DNA-dependent transcription.	207	0.457	4.34e-13
REGULATION_OF_RNA_METABOLIC_PROCESS	458	Genes annotated by the GO term GO:0051252. Any process that modulates the frequency, rate or extent of the chemical reactions and pathways involving RNA.	208	0.4541	8.03e-13
REGULATION_OF_TRANSCRIPTION	556	Genes annotated by the GO term GO:0045449. Any process that modulates the frequency, rate or extent of the synthesis of either RNA on a template of DNA or DNA on a template of RNA.	238	0.4281	3.2e-11
NUCLEOBASENUCLEOSIDENUCLEOTIDE_AND_NUCLEIC_ACID_METABOLIC_PROCESS	1208	Genes annotated by the GO term GO:0006139. The chemical reactions and pathways involving nucleobases, nucleosides, nucleotides and nucleic acids.	454	0.3758	6.1e-10
REGULATION_OF_TRANSCRIPTION_FROM_RNA_POLYMERASE_II_PROMOTER	286	Genes annotated by the GO term GO:0006357. Any process that modulates the frequency, rate or extent of transcription from an RNA polymerase II promoter.	134	0.4685	1.1e-09
Gene/Gene Set Overlap Matrix
Gene Symbol	Description	TRANSCRIPTION	TRANSCRIPTION_DNA_DEPENDENT	RNA_BIOSYNTHETIC_PROCESS	TRANSCRIPTION_FROM_RNA_POLYMERASE_II_PROMOTER	RNA_METABOLIC_PROCESS	REGULATION_OF_TRANSCRIPTIONDNA_DEPENDENT	REGULATION_OF_RNA_METABOLIC_PROCESS	REGULATION_OF_TRANSCRIPTION	NUCLEOBASENUCLEOSIDENUCLEOTIDE_AND_NUCLEIC_ACID_METABOLIC_PROCESS	REGULATION_OF_TRANSCRIPTION_FROM_RNA_POLYMERASE_II_PROMOTER
SMAD3	SMAD, mothers against DPP homolog 3 (Drosophila)	TRANSCRIPTION	TRANSCRIPTION_DNA_DEPENDENT	RNA_BIOSYNTHETIC_PROCESS	TRANSCRIPTION_FROM_RNA_POLYMERASE_II_PROMOTER	RNA_METABOLIC_PROCESS	REGULATION_OF_TRANSCRIPTIONDNA_DEPENDENT	REGULATION_OF_RNA_METABOLIC_PROCESS	REGULATION_OF_TRANSCRIPTION	NUCLEOBASENUCLEOSIDENUCLEOTIDE_AND_NUCLEIC_ACID_METABOLIC_PROCESS	REGULATION_OF_TRANSCRIPTION_FROM_RNA_POLYMERASE_II_PROMOTER
EPC1	enhancer of polycomb homolog 1 (Drosophila)	TRANSCRIPTION	TRANSCRIPTION_DNA_DEPENDENT	RNA_BIOSYNTHETIC_PROCESS	TRANSCRIPTION_FROM_RNA_POLYMERASE_II_PROMOTER	RNA_METABOLIC_PROCESS	REGULATION_OF_TRANSCRIPTIONDNA_DEPENDENT	REGULATION_OF_RNA_METABOLIC_PROCESS	REGULATION_OF_TRANSCRIPTION	NUCLEOBASENUCLEOSIDENUCLEOTIDE_AND_NUCLEIC_ACID_METABOLIC_PROCESS	REGULATION_OF_TRANSCRIPTION_FROM_RNA_POLYMERASE_II_PROMOTER
SUPT5H	suppressor of Ty 5 homolog (S. cerevisiae)	TRANSCRIPTION	TRANSCRIPTION_DNA_DEPENDENT	RNA_BIOSYNTHETIC_PROCESS	TRANSCRIPTION_FROM_RNA_POLYMERASE_II_PROMOTER	RNA_METABOLIC_PROCESS	REGULATION_OF_TRANSCRIPTIONDNA_DEPENDENT	REGULATION_OF_RNA_METABOLIC_PROCESS	REGULATION_OF_TRANSCRIPTION	NUCLEOBASENUCLEOSIDENUCLEOTIDE_AND_NUCLEIC_ACID_METABOLIC_PROCESS	REGULATION_OF_TRANSCRIPTION_FROM_RNA_POLYMERASE_II_PROMOTER
FOXD3	forkhead box D3	TRANSCRIPTION	TRANSCRIPTION_DNA_DEPENDENT	RNA_BIOSYNTHETIC_PROCESS	TRANSCRIPTION_FROM_RNA_POLYMERASE_II_PROMOTER	RNA_METABOLIC_PROCESS	REGULATION_OF_TRANSCRIPTIONDNA_DEPENDENT	REGULATION_OF_RNA_METABOLIC_PROCESS	REGULATION_OF_TRANSCRIPTION	NUCLEOBASENUCLEOSIDENUCLEOTIDE_AND_NUCLEIC_ACID_METABOLIC_PROCESS	REGULATION_OF_TRANSCRIPTION_FROM_RNA_POLYMERASE_II_PROMOTER
NRIP1	nuclear receptor interacting protein 1	TRANSCRIPTION	TRANSCRIPTION_DNA_DEPENDENT	RNA_BIOSYNTHETIC_PROCESS	TRANSCRIPTION_FROM_RNA_POLYMERASE_II_PROMOTER	RNA_METABOLIC_PROCESS	REGULATION_OF_TRANSCRIPTIONDNA_DEPENDENT	REGULATION_OF_RNA_METABOLIC_PROCESS	REGULATION_OF_TRANSCRIPTION	NUCLEOBASENUCLEOSIDENUCLEOTIDE_AND_NUCLEIC_ACID_METABOLIC_PROCESS	REGULATION_OF_TRANSCRIPTION_FROM_RNA_POLYMERASE_II_PROMOTER
NSD1	nuclear receptor binding SET domain protein 1	TRANSCRIPTION	TRANSCRIPTION_DNA_DEPENDENT	RNA_BIOSYNTHETIC_PROCESS	TRANSCRIPTION_FROM_RNA_POLYMERASE_II_PROMOTER	RNA_METABOLIC_PROCESS	REGULATION_OF_TRANSCRIPTIONDNA_DEPENDENT	REGULATION_OF_RNA_METABOLIC_PROCESS	REGULATION_OF_TRANSCRIPTION	NUCLEOBASENUCLEOSIDENUCLEOTIDE_AND_NUCLEIC_ACID_METABOLIC_PROCESS	REGULATION_OF_TRANSCRIPTION_FROM_RNA_POLYMERASE_II_PROMOTER
SPI1	spleen focus forming virus (SFFV) proviral integration oncogene spi1	TRANSCRIPTION	TRANSCRIPTION_DNA_DEPENDENT	RNA_BIOSYNTHETIC_PROCESS	TRANSCRIPTION_FROM_RNA_POLYMERASE_II_PROMOTER	RNA_METABOLIC_PROCESS	REGULATION_OF_TRANSCRIPTIONDNA_DEPENDENT	REGULATION_OF_RNA_METABOLIC_PROCESS	REGULATION_OF_TRANSCRIPTION	NUCLEOBASENUCLEOSIDENUCLEOTIDE_AND_NUCLEIC_ACID_METABOLIC_PROCESS	REGULATION_OF_TRANSCRIPTION_FROM_RNA_POLYMERASE_II_PROMOTER
CTCF	CCCTC-binding factor (zinc finger protein)	TRANSCRIPTION	TRANSCRIPTION_DNA_DEPENDENT	RNA_BIOSYNTHETIC_PROCESS	TRANSCRIPTION_FROM_RNA_POLYMERASE_II_PROMOTER	RNA_METABOLIC_PROCESS	REGULATION_OF_TRANSCRIPTIONDNA_DEPENDENT	REGULATION_OF_RNA_METABOLIC_PROCESS	REGULATION_OF_TRANSCRIPTION	NUCLEOBASENUCLEOSIDENUCLEOTIDE_AND_NUCLEIC_ACID_METABOLIC_PROCESS	REGULATION_OF_TRANSCRIPTION_FROM_RNA_POLYMERASE_II_PROMOTER
HMGB1	high-mobility group box 1	TRANSCRIPTION	TRANSCRIPTION_DNA_DEPENDENT	RNA_BIOSYNTHETIC_PROCESS	TRANSCRIPTION_FROM_RNA_POLYMERASE_II_PROMOTER	RNA_METABOLIC_PROCESS	REGULATION_OF_TRANSCRIPTIONDNA_DEPENDENT	REGULATION_OF_RNA_METABOLIC_PROCESS	REGULATION_OF_TRANSCRIPTION	NUCLEOBASENUCLEOSIDENUCLEOTIDE_AND_NUCLEIC_ACID_METABOLIC_PROCESS	REGULATION_OF_TRANSCRIPTION_FROM_RNA_POLYMERASE_II_PROMOTER
HDAC8	histone deacetylase 8	TRANSCRIPTION	TRANSCRIPTION_DNA_DEPENDENT	RNA_BIOSYNTHETIC_PROCESS	TRANSCRIPTION_FROM_RNA_POLYMERASE_II_PROMOTER	RNA_METABOLIC_PROCESS	REGULATION_OF_TRANSCRIPTIONDNA_DEPENDENT	REGULATION_OF_RNA_METABOLIC_PROCESS	REGULATION_OF_TRANSCRIPTION	NUCLEOBASENUCLEOSIDENUCLEOTIDE_AND_NUCLEIC_ACID_METABOLIC_PROCESS	REGULATION_OF_TRANSCRIPTION_FROM_RNA_POLYMERASE_II_PROMOTER
BCL6	B-cell CLL/lymphoma 6 (zinc finger protein 51)	TRANSCRIPTION	TRANSCRIPTION_DNA_DEPENDENT	RNA_BIOSYNTHETIC_PROCESS	TRANSCRIPTION_FROM_RNA_POLYMERASE_II_PROMOTER	RNA_METABOLIC_PROCESS	REGULATION_OF_TRANSCRIPTIONDNA_DEPENDENT	REGULATION_OF_RNA_METABOLIC_PROCESS	REGULATION_OF_TRANSCRIPTION	NUCLEOBASENUCLEOSIDENUCLEOTIDE_AND_NUCLEIC_ACID_METABOLIC_PROCESS	REGULATION_OF_TRANSCRIPTION_FROM_RNA_POLYMERASE_II_PROMOTER
HEXIM1	hexamethylene bis-acetamide inducible 1	TRANSCRIPTION	TRANSCRIPTION_DNA_DEPENDENT	RNA_BIOSYNTHETIC_PROCESS	TRANSCRIPTION_FROM_RNA_POLYMERASE_II_PROMOTER	RNA_METABOLIC_PROCESS	REGULATION_OF_TRANSCRIPTIONDNA_DEPENDENT	REGULATION_OF_RNA_METABOLIC_PROCESS	REGULATION_OF_TRANSCRIPTION	NUCLEOBASENUCLEOSIDENUCLEOTIDE_AND_NUCLEIC_ACID_METABOLIC_PROCESS	REGULATION_OF_TRANSCRIPTION_FROM_RNA_POLYMERASE_II_PROMOTER
DNMT1	DNA (cytosine-5-)-methyltransferase 1	TRANSCRIPTION	TRANSCRIPTION_DNA_DEPENDENT	RNA_BIOSYNTHETIC_PROCESS	TRANSCRIPTION_FROM_RNA_POLYMERASE_II_PROMOTER	RNA_METABOLIC_PROCESS	REGULATION_OF_TRANSCRIPTIONDNA_DEPENDENT	REGULATION_OF_RNA_METABOLIC_PROCESS	REGULATION_OF_TRANSCRIPTION	NUCLEOBASENUCLEOSIDENUCLEOTIDE_AND_NUCLEIC_ACID_METABOLIC_PROCESS	REGULATION_OF_TRANSCRIPTION_FROM_RNA_POLYMERASE_II_PROMOTER
TRIM27	tripartite motif-containing 27	TRANSCRIPTION	TRANSCRIPTION_DNA_DEPENDENT	RNA_BIOSYNTHETIC_PROCESS	TRANSCRIPTION_FROM_RNA_POLYMERASE_II_PROMOTER	RNA_METABOLIC_PROCESS	REGULATION_OF_TRANSCRIPTIONDNA_DEPENDENT	REGULATION_OF_RNA_METABOLIC_PROCESS	REGULATION_OF_TRANSCRIPTION	NUCLEOBASENUCLEOSIDENUCLEOTIDE_AND_NUCLEIC_ACID_METABOLIC_PROCESS	REGULATION_OF_TRANSCRIPTION_FROM_RNA_POLYMERASE_II_PROMOTER
E2F1	E2F transcription factor 1	TRANSCRIPTION	TRANSCRIPTION_DNA_DEPENDENT	RNA_BIOSYNTHETIC_PROCESS	TRANSCRIPTION_FROM_RNA_POLYMERASE_II_PROMOTER	RNA_METABOLIC_PROCESS	REGULATION_OF_TRANSCRIPTIONDNA_DEPENDENT	REGULATION_OF_RNA_METABOLIC_PROCESS	REGULATION_OF_TRANSCRIPTION	NUCLEOBASENUCLEOSIDENUCLEOTIDE_AND_NUCLEIC_ACID_METABOLIC_PROCESS	REGULATION_OF_TRANSCRIPTION_FROM_RNA_POLYMERASE_II_PROMOTER
GFI1B	growth factor independent 1B (potential regulator of CDKN1A, translocated in CML)	TRANSCRIPTION	TRANSCRIPTION_DNA_DEPENDENT	RNA_BIOSYNTHETIC_PROCESS	TRANSCRIPTION_FROM_RNA_POLYMERASE_II_PROMOTER	RNA_METABOLIC_PROCESS	REGULATION_OF_TRANSCRIPTIONDNA_DEPENDENT	REGULATION_OF_RNA_METABOLIC_PROCESS	REGULATION_OF_TRANSCRIPTION	NUCLEOBASENUCLEOSIDENUCLEOTIDE_AND_NUCLEIC_ACID_METABOLIC_PROCESS	REGULATION_OF_TRANSCRIPTION_FROM_RNA_POLYMERASE_II_PROMOTER
MDM2	Mdm2, transformed 3T3 cell double minute 2, p53 binding protein (mouse)	TRANSCRIPTION	TRANSCRIPTION_DNA_DEPENDENT	RNA_BIOSYNTHETIC_PROCESS	TRANSCRIPTION_FROM_RNA_POLYMERASE_II_PROMOTER	RNA_METABOLIC_PROCESS	REGULATION_OF_TRANSCRIPTIONDNA_DEPENDENT	REGULATION_OF_RNA_METABOLIC_PROCESS	REGULATION_OF_TRANSCRIPTION	NUCLEOBASENUCLEOSIDENUCLEOTIDE_AND_NUCLEIC_ACID_METABOLIC_PROCESS	REGULATION_OF_TRANSCRIPTION_FROM_RNA_POLYMERASE_II_PROMOTER
MDM4	Mdm4, transformed 3T3 cell double minute 4, p53 binding protein (mouse)	TRANSCRIPTION	TRANSCRIPTION_DNA_DEPENDENT	RNA_BIOSYNTHETIC_PROCESS	TRANSCRIPTION_FROM_RNA_POLYMERASE_II_PROMOTER	RNA_METABOLIC_PROCESS	REGULATION_OF_TRANSCRIPTIONDNA_DEPENDENT	REGULATION_OF_RNA_METABOLIC_PROCESS	REGULATION_OF_TRANSCRIPTION	NUCLEOBASENUCLEOSIDENUCLEOTIDE_AND_NUCLEIC_ACID_METABOLIC_PROCESS	REGULATION_OF_TRANSCRIPTION_FROM_RNA_POLYMERASE_II_PROMOTER
VHL	von Hippel-Lindau tumor suppressor	TRANSCRIPTION	TRANSCRIPTION_DNA_DEPENDENT	RNA_BIOSYNTHETIC_PROCESS	TRANSCRIPTION_FROM_RNA_POLYMERASE_II_PROMOTER	RNA_METABOLIC_PROCESS	REGULATION_OF_TRANSCRIPTIONDNA_DEPENDENT	REGULATION_OF_RNA_METABOLIC_PROCESS	REGULATION_OF_TRANSCRIPTION	NUCLEOBASENUCLEOSIDENUCLEOTIDE_AND_NUCLEIC_ACID_METABOLIC_PROCESS	REGULATION_OF_TRANSCRIPTION_FROM_RNA_POLYMERASE_II_PROMOTER
ORC2L	origin recognition complex, subunit 2-like (yeast)	TRANSCRIPTION	TRANSCRIPTION_DNA_DEPENDENT	RNA_BIOSYNTHETIC_PROCESS	TRANSCRIPTION_FROM_RNA_POLYMERASE_II_PROMOTER	RNA_METABOLIC_PROCESS	REGULATION_OF_TRANSCRIPTIONDNA_DEPENDENT	REGULATION_OF_RNA_METABOLIC_PROCESS	REGULATION_OF_TRANSCRIPTION	NUCLEOBASENUCLEOSIDENUCLEOTIDE_AND_NUCLEIC_ACID_METABOLIC_PROCESS	REGULATION_OF_TRANSCRIPTION_FROM_RNA_POLYMERASE_II_PROMOTER
MDFI	MyoD family inhibitor	TRANSCRIPTION	TRANSCRIPTION_DNA_DEPENDENT	RNA_BIOSYNTHETIC_PROCESS	TRANSCRIPTION_FROM_RNA_POLYMERASE_II_PROMOTER	RNA_METABOLIC_PROCESS	REGULATION_OF_TRANSCRIPTIONDNA_DEPENDENT	REGULATION_OF_RNA_METABOLIC_PROCESS	REGULATION_OF_TRANSCRIPTION	NUCLEOBASENUCLEOSIDENUCLEOTIDE_AND_NUCLEIC_ACID_METABOLIC_PROCESS	REGULATION_OF_TRANSCRIPTION_FROM_RNA_POLYMERASE_II_PROMOTER
KLF10	Kruppel-like factor 10	TRANSCRIPTION	TRANSCRIPTION_DNA_DEPENDENT	RNA_BIOSYNTHETIC_PROCESS	TRANSCRIPTION_FROM_RNA_POLYMERASE_II_PROMOTER	RNA_METABOLIC_PROCESS	REGULATION_OF_TRANSCRIPTIONDNA_DEPENDENT	REGULATION_OF_RNA_METABOLIC_PROCESS	REGULATION_OF_TRANSCRIPTION	NUCLEOBASENUCLEOSIDENUCLEOTIDE_AND_NUCLEIC_ACID_METABOLIC_PROCESS	REGULATION_OF_TRANSCRIPTION_FROM_RNA_POLYMERASE_II_PROMOTER
PPARD	peroxisome proliferative activated receptor, delta	TRANSCRIPTION	TRANSCRIPTION_DNA_DEPENDENT	RNA_BIOSYNTHETIC_PROCESS	TRANSCRIPTION_FROM_RNA_POLYMERASE_II_PROMOTER	RNA_METABOLIC_PROCESS	REGULATION_OF_TRANSCRIPTIONDNA_DEPENDENT	REGULATION_OF_RNA_METABOLIC_PROCESS	REGULATION_OF_TRANSCRIPTION	NUCLEOBASENUCLEOSIDENUCLEOTIDE_AND_NUCLEIC_ACID_METABOLIC_PROCESS	REGULATION_OF_TRANSCRIPTION_FROM_RNA_POLYMERASE_II_PROMOTER
KLF11	Kruppel-like factor 11	TRANSCRIPTION	TRANSCRIPTION_DNA_DEPENDENT	RNA_BIOSYNTHETIC_PROCESS	TRANSCRIPTION_FROM_RNA_POLYMERASE_II_PROMOTER	RNA_METABOLIC_PROCESS	REGULATION_OF_TRANSCRIPTIONDNA_DEPENDENT	REGULATION_OF_RNA_METABOLIC_PROCESS	REGULATION_OF_TRANSCRIPTION	NUCLEOBASENUCLEOSIDENUCLEOTIDE_AND_NUCLEIC_ACID_METABOLIC_PROCESS	REGULATION_OF_TRANSCRIPTION_FROM_RNA_POLYMERASE_II_PROMOTER
MXD4	MAX dimerization protein 4	TRANSCRIPTION	TRANSCRIPTION_DNA_DEPENDENT	RNA_BIOSYNTHETIC_PROCESS	TRANSCRIPTION_FROM_RNA_POLYMERASE_II_PROMOTER	RNA_METABOLIC_PROCESS	REGULATION_OF_TRANSCRIPTIONDNA_DEPENDENT	REGULATION_OF_RNA_METABOLIC_PROCESS	REGULATION_OF_TRANSCRIPTION	NUCLEOBASENUCLEOSIDENUCLEOTIDE_AND_NUCLEIC_ACID_METABOLIC_PROCESS	REGULATION_OF_TRANSCRIPTION_FROM_RNA_POLYMERASE_II_PROMOTER
NR0B2	nuclear receptor subfamily 0, group B, member 2	TRANSCRIPTION	TRANSCRIPTION_DNA_DEPENDENT	RNA_BIOSYNTHETIC_PROCESS	TRANSCRIPTION_FROM_RNA_POLYMERASE_II_PROMOTER	RNA_METABOLIC_PROCESS	REGULATION_OF_TRANSCRIPTIONDNA_DEPENDENT	REGULATION_OF_RNA_METABOLIC_PROCESS	REGULATION_OF_TRANSCRIPTION	NUCLEOBASENUCLEOSIDENUCLEOTIDE_AND_NUCLEIC_ACID_METABOLIC_PROCESS	REGULATION_OF_TRANSCRIPTION_FROM_RNA_POLYMERASE_II_PROMOTER
TWIST1	twist homolog 1 (acrocephalosyndactyly 3; Saethre-Chotzen syndrome) (Drosophila)	TRANSCRIPTION	TRANSCRIPTION_DNA_DEPENDENT	RNA_BIOSYNTHETIC_PROCESS	TRANSCRIPTION_FROM_RNA_POLYMERASE_II_PROMOTER	RNA_METABOLIC_PROCESS	REGULATION_OF_TRANSCRIPTIONDNA_DEPENDENT	REGULATION_OF_RNA_METABOLIC_PROCESS	REGULATION_OF_TRANSCRIPTION	NUCLEOBASENUCLEOSIDENUCLEOTIDE_AND_NUCLEIC_ACID_METABOLIC_PROCESS	REGULATION_OF_TRANSCRIPTION_FROM_RNA_POLYMERASE_II_PROMOTER
NR6A1	nuclear receptor subfamily 6, group A, member 1	TRANSCRIPTION	TRANSCRIPTION_DNA_DEPENDENT	RNA_BIOSYNTHETIC_PROCESS	TRANSCRIPTION_FROM_RNA_POLYMERASE_II_PROMOTER	RNA_METABOLIC_PROCESS	REGULATION_OF_TRANSCRIPTIONDNA_DEPENDENT	REGULATION_OF_RNA_METABOLIC_PROCESS	REGULATION_OF_TRANSCRIPTION	NUCLEOBASENUCLEOSIDENUCLEOTIDE_AND_NUCLEIC_ACID_METABOLIC_PROCESS	REGULATION_OF_TRANSCRIPTION_FROM_RNA_POLYMERASE_II_PROMOTER
IRF2	interferon regulatory factor 2	TRANSCRIPTION	TRANSCRIPTION_DNA_DEPENDENT	RNA_BIOSYNTHETIC_PROCESS	TRANSCRIPTION_FROM_RNA_POLYMERASE_II_PROMOTER	RNA_METABOLIC_PROCESS	REGULATION_OF_TRANSCRIPTIONDNA_DEPENDENT	REGULATION_OF_RNA_METABOLIC_PROCESS	REGULATION_OF_TRANSCRIPTION	NUCLEOBASENUCLEOSIDENUCLEOTIDE_AND_NUCLEIC_ACID_METABOLIC_PROCESS	REGULATION_OF_TRANSCRIPTION_FROM_RNA_POLYMERASE_II_PROMOTER
ZMYND11	zinc finger, MYND domain containing 11	TRANSCRIPTION	TRANSCRIPTION_DNA_DEPENDENT	RNA_BIOSYNTHETIC_PROCESS	TRANSCRIPTION_FROM_RNA_POLYMERASE_II_PROMOTER	RNA_METABOLIC_PROCESS	REGULATION_OF_TRANSCRIPTIONDNA_DEPENDENT	REGULATION_OF_RNA_METABOLIC_PROCESS	REGULATION_OF_TRANSCRIPTION	NUCLEOBASENUCLEOSIDENUCLEOTIDE_AND_NUCLEIC_ACID_METABOLIC_PROCESS	REGULATION_OF_TRANSCRIPTION_FROM_RNA_POLYMERASE_II_PROMOTER
IRF8	interferon regulatory factor 8	TRANSCRIPTION	TRANSCRIPTION_DNA_DEPENDENT	RNA_BIOSYNTHETIC_PROCESS	TRANSCRIPTION_FROM_RNA_POLYMERASE_II_PROMOTER	RNA_METABOLIC_PROCESS	REGULATION_OF_TRANSCRIPTIONDNA_DEPENDENT	REGULATION_OF_RNA_METABOLIC_PROCESS	REGULATION_OF_TRANSCRIPTION	NUCLEOBASENUCLEOSIDENUCLEOTIDE_AND_NUCLEIC_ACID_METABOLIC_PROCESS	REGULATION_OF_TRANSCRIPTION_FROM_RNA_POLYMERASE_II_PROMOTER
FOSB	FBJ murine osteosarcoma viral oncogene homolog B	TRANSCRIPTION	TRANSCRIPTION_DNA_DEPENDENT	RNA_BIOSYNTHETIC_PROCESS	TRANSCRIPTION_FROM_RNA_POLYMERASE_II_PROMOTER	RNA_METABOLIC_PROCESS	REGULATION_OF_TRANSCRIPTIONDNA_DEPENDENT	REGULATION_OF_RNA_METABOLIC_PROCESS	REGULATION_OF_TRANSCRIPTION	NUCLEOBASENUCLEOSIDENUCLEOTIDE_AND_NUCLEIC_ACID_METABOLIC_PROCESS	REGULATION_OF_TRANSCRIPTION_FROM_RNA_POLYMERASE_II_PROMOTER
POU4F2	POU domain, class 4, transcription factor 2	TRANSCRIPTION	TRANSCRIPTION_DNA_DEPENDENT	RNA_BIOSYNTHETIC_PROCESS	TRANSCRIPTION_FROM_RNA_POLYMERASE_II_PROMOTER	RNA_METABOLIC_PROCESS	REGULATION_OF_TRANSCRIPTIONDNA_DEPENDENT	REGULATION_OF_RNA_METABOLIC_PROCESS	REGULATION_OF_TRANSCRIPTION	NUCLEOBASENUCLEOSIDENUCLEOTIDE_AND_NUCLEIC_ACID_METABOLIC_PROCESS	REGULATION_OF_TRANSCRIPTION_FROM_RNA_POLYMERASE_II_PROMOTER
DR1	down-regulator of transcription 1, TBP-binding (negative cofactor 2)	TRANSCRIPTION	TRANSCRIPTION_DNA_DEPENDENT	RNA_BIOSYNTHETIC_PROCESS	TRANSCRIPTION_FROM_RNA_POLYMERASE_II_PROMOTER	RNA_METABOLIC_PROCESS	REGULATION_OF_TRANSCRIPTIONDNA_DEPENDENT	REGULATION_OF_RNA_METABOLIC_PROCESS	REGULATION_OF_TRANSCRIPTION	NUCLEOBASENUCLEOSIDENUCLEOTIDE_AND_NUCLEIC_ACID_METABOLIC_PROCESS	REGULATION_OF_TRANSCRIPTION_FROM_RNA_POLYMERASE_II_PROMOTER
JAZF1	JAZF zinc finger 1	TRANSCRIPTION	TRANSCRIPTION_DNA_DEPENDENT	RNA_BIOSYNTHETIC_PROCESS	TRANSCRIPTION_FROM_RNA_POLYMERASE_II_PROMOTER	RNA_METABOLIC_PROCESS	REGULATION_OF_TRANSCRIPTIONDNA_DEPENDENT	REGULATION_OF_RNA_METABOLIC_PROCESS	REGULATION_OF_TRANSCRIPTION	NUCLEOBASENUCLEOSIDENUCLEOTIDE_AND_NUCLEIC_ACID_METABOLIC_PROCESS	REGULATION_OF_TRANSCRIPTION_FROM_RNA_POLYMERASE_II_PROMOTER
MECP2	methyl CpG binding protein 2 (Rett syndrome)	TRANSCRIPTION	TRANSCRIPTION_DNA_DEPENDENT	RNA_BIOSYNTHETIC_PROCESS	TRANSCRIPTION_FROM_RNA_POLYMERASE_II_PROMOTER	RNA_METABOLIC_PROCESS	REGULATION_OF_TRANSCRIPTIONDNA_DEPENDENT	REGULATION_OF_RNA_METABOLIC_PROCESS	REGULATION_OF_TRANSCRIPTION	NUCLEOBASENUCLEOSIDENUCLEOTIDE_AND_NUCLEIC_ACID_METABOLIC_PROCESS	REGULATION_OF_TRANSCRIPTION_FROM_RNA_POLYMERASE_II_PROMOTER
MEIS2	Meis1, myeloid ecotropic viral integration site 1 homolog 2 (mouse)	TRANSCRIPTION	TRANSCRIPTION_DNA_DEPENDENT	RNA_BIOSYNTHETIC_PROCESS	TRANSCRIPTION_FROM_RNA_POLYMERASE_II_PROMOTER	RNA_METABOLIC_PROCESS	REGULATION_OF_TRANSCRIPTIONDNA_DEPENDENT	REGULATION_OF_RNA_METABOLIC_PROCESS	REGULATION_OF_TRANSCRIPTION	NUCLEOBASENUCLEOSIDENUCLEOTIDE_AND_NUCLEIC_ACID_METABOLIC_PROCESS	REGULATION_OF_TRANSCRIPTION_FROM_RNA_POLYMERASE_II_PROMOTER
MEN1	multiple endocrine neoplasia I	TRANSCRIPTION	TRANSCRIPTION_DNA_DEPENDENT	RNA_BIOSYNTHETIC_PROCESS	TRANSCRIPTION_FROM_RNA_POLYMERASE_II_PROMOTER	RNA_METABOLIC_PROCESS	REGULATION_OF_TRANSCRIPTIONDNA_DEPENDENT	REGULATION_OF_RNA_METABOLIC_PROCESS	REGULATION_OF_TRANSCRIPTION	NUCLEOBASENUCLEOSIDENUCLEOTIDE_AND_NUCLEIC_ACID_METABOLIC_PROCESS	REGULATION_OF_TRANSCRIPTION_FROM_RNA_POLYMERASE_II_PROMOTER
PHF21A	PHD finger protein 21A	TRANSCRIPTION	TRANSCRIPTION_DNA_DEPENDENT	RNA_BIOSYNTHETIC_PROCESS	TRANSCRIPTION_FROM_RNA_POLYMERASE_II_PROMOTER	RNA_METABOLIC_PROCESS	REGULATION_OF_TRANSCRIPTIONDNA_DEPENDENT	REGULATION_OF_RNA_METABOLIC_PROCESS	REGULATION_OF_TRANSCRIPTION	NUCLEOBASENUCLEOSIDENUCLEOTIDE_AND_NUCLEIC_ACID_METABOLIC_PROCESS	REGULATION_OF_TRANSCRIPTION_FROM_RNA_POLYMERASE_II_PROMOTER
PRDM1	PR domain containing 1, with ZNF domain	TRANSCRIPTION	TRANSCRIPTION_DNA_DEPENDENT	RNA_BIOSYNTHETIC_PROCESS	TRANSCRIPTION_FROM_RNA_POLYMERASE_II_PROMOTER	RNA_METABOLIC_PROCESS	REGULATION_OF_TRANSCRIPTIONDNA_DEPENDENT	REGULATION_OF_RNA_METABOLIC_PROCESS	REGULATION_OF_TRANSCRIPTION	NUCLEOBASENUCLEOSIDENUCLEOTIDE_AND_NUCLEIC_ACID_METABOLIC_PROCESS	REGULATION_OF_TRANSCRIPTION_FROM_RNA_POLYMERASE_II_PROMOTER
VPS72	vacuolar protein sorting 72 (S. cerevisiae)	TRANSCRIPTION	TRANSCRIPTION_DNA_DEPENDENT	RNA_BIOSYNTHETIC_PROCESS	TRANSCRIPTION_FROM_RNA_POLYMERASE_II_PROMOTER	RNA_METABOLIC_PROCESS	REGULATION_OF_TRANSCRIPTIONDNA_DEPENDENT	REGULATION_OF_RNA_METABOLIC_PROCESS	REGULATION_OF_TRANSCRIPTION	NUCLEOBASENUCLEOSIDENUCLEOTIDE_AND_NUCLEIC_ACID_METABOLIC_PROCESS	REGULATION_OF_TRANSCRIPTION_FROM_RNA_POLYMERASE_II_PROMOTER
ZBTB32	zinc finger and BTB domain containing 32	TRANSCRIPTION	TRANSCRIPTION_DNA_DEPENDENT	RNA_BIOSYNTHETIC_PROCESS	TRANSCRIPTION_FROM_RNA_POLYMERASE_II_PROMOTER	RNA_METABOLIC_PROCESS	REGULATION_OF_TRANSCRIPTIONDNA_DEPENDENT	REGULATION_OF_RNA_METABOLIC_PROCESS	REGULATION_OF_TRANSCRIPTION	NUCLEOBASENUCLEOSIDENUCLEOTIDE_AND_NUCLEIC_ACID_METABOLIC_PROCESS	REGULATION_OF_TRANSCRIPTION_FROM_RNA_POLYMERASE_II_PROMOTER
ZNF174	zinc finger protein 174	TRANSCRIPTION	TRANSCRIPTION_DNA_DEPENDENT	RNA_BIOSYNTHETIC_PROCESS	TRANSCRIPTION_FROM_RNA_POLYMERASE_II_PROMOTER	RNA_METABOLIC_PROCESS	REGULATION_OF_TRANSCRIPTIONDNA_DEPENDENT	REGULATION_OF_RNA_METABOLIC_PROCESS	REGULATION_OF_TRANSCRIPTION	NUCLEOBASENUCLEOSIDENUCLEOTIDE_AND_NUCLEIC_ACID_METABOLIC_PROCESS	REGULATION_OF_TRANSCRIPTION_FROM_RNA_POLYMERASE_II_PROMOTER
SMAD2	SMAD, mothers against DPP homolog 2 (Drosophila)	TRANSCRIPTION	TRANSCRIPTION_DNA_DEPENDENT	RNA_BIOSYNTHETIC_PROCESS	TRANSCRIPTION_FROM_RNA_POLYMERASE_II_PROMOTER	RNA_METABOLIC_PROCESS	REGULATION_OF_TRANSCRIPTIONDNA_DEPENDENT	REGULATION_OF_RNA_METABOLIC_PROCESS	REGULATION_OF_TRANSCRIPTION	NUCLEOBASENUCLEOSIDENUCLEOTIDE_AND_NUCLEIC_ACID_METABOLIC_PROCESS	REGULATION_OF_TRANSCRIPTION_FROM_RNA_POLYMERASE_II_PROMOTER
SMARCE1	SWI/SNF related, matrix associated, actin dependent regulator of chromatin, subfamily e, member 1	TRANSCRIPTION	TRANSCRIPTION_DNA_DEPENDENT	RNA_BIOSYNTHETIC_PROCESS	TRANSCRIPTION_FROM_RNA_POLYMERASE_II_PROMOTER	RNA_METABOLIC_PROCESS	REGULATION_OF_TRANSCRIPTIONDNA_DEPENDENT	REGULATION_OF_RNA_METABOLIC_PROCESS	REGULATION_OF_TRANSCRIPTION	NUCLEOBASENUCLEOSIDENUCLEOTIDE_AND_NUCLEIC_ACID_METABOLIC_PROCESS	REGULATION_OF_TRANSCRIPTION_FROM_RNA_POLYMERASE_II_PROMOTER
BRCA1	breast cancer 1, early onset	TRANSCRIPTION	TRANSCRIPTION_DNA_DEPENDENT	RNA_BIOSYNTHETIC_PROCESS	TRANSCRIPTION_FROM_RNA_POLYMERASE_II_PROMOTER	RNA_METABOLIC_PROCESS	REGULATION_OF_TRANSCRIPTIONDNA_DEPENDENT	REGULATION_OF_RNA_METABOLIC_PROCESS	REGULATION_OF_TRANSCRIPTION	NUCLEOBASENUCLEOSIDENUCLEOTIDE_AND_NUCLEIC_ACID_METABOLIC_PROCESS	REGULATION_OF_TRANSCRIPTION_FROM_RNA_POLYMERASE_II_PROMOTER
SNW1	SNW domain containing 1	TRANSCRIPTION	TRANSCRIPTION_DNA_DEPENDENT	RNA_BIOSYNTHETIC_PROCESS	TRANSCRIPTION_FROM_RNA_POLYMERASE_II_PROMOTER	RNA_METABOLIC_PROCESS	REGULATION_OF_TRANSCRIPTIONDNA_DEPENDENT	REGULATION_OF_RNA_METABOLIC_PROCESS	REGULATION_OF_TRANSCRIPTION	NUCLEOBASENUCLEOSIDENUCLEOTIDE_AND_NUCLEIC_ACID_METABOLIC_PROCESS	REGULATION_OF_TRANSCRIPTION_FROM_RNA_POLYMERASE_II_PROMOTER
TP53	tumor protein p53 (Li-Fraumeni syndrome)	TRANSCRIPTION	TRANSCRIPTION_DNA_DEPENDENT	RNA_BIOSYNTHETIC_PROCESS	TRANSCRIPTION_FROM_RNA_POLYMERASE_II_PROMOTER	RNA_METABOLIC_PROCESS	REGULATION_OF_TRANSCRIPTIONDNA_DEPENDENT	REGULATION_OF_RNA_METABOLIC_PROCESS	REGULATION_OF_TRANSCRIPTION	NUCLEOBASENUCLEOSIDENUCLEOTIDE_AND_NUCLEIC_ACID_METABOLIC_PROCESS	REGULATION_OF_TRANSCRIPTION_FROM_RNA_POLYMERASE_II_PROMOTER
RBM14	RNA binding motif protein 14	TRANSCRIPTION	TRANSCRIPTION_DNA_DEPENDENT	RNA_BIOSYNTHETIC_PROCESS	TRANSCRIPTION_FROM_RNA_POLYMERASE_II_PROMOTER	RNA_METABOLIC_PROCESS	REGULATION_OF_TRANSCRIPTIONDNA_DEPENDENT	REGULATION_OF_RNA_METABOLIC_PROCESS	REGULATION_OF_TRANSCRIPTION	NUCLEOBASENUCLEOSIDENUCLEOTIDE_AND_NUCLEIC_ACID_METABOLIC_PROCESS	REGULATION_OF_TRANSCRIPTION_FROM_RNA_POLYMERASE_II_PROMOTER
ERCC3	excision repair cross-complementing rodent repair deficiency, complementation group 3 (xeroderma pigmentosum group B complementing)	TRANSCRIPTION	TRANSCRIPTION_DNA_DEPENDENT	RNA_BIOSYNTHETIC_PROCESS	TRANSCRIPTION_FROM_RNA_POLYMERASE_II_PROMOTER	RNA_METABOLIC_PROCESS	REGULATION_OF_TRANSCRIPTIONDNA_DEPENDENT	REGULATION_OF_RNA_METABOLIC_PROCESS	REGULATION_OF_TRANSCRIPTION	NUCLEOBASENUCLEOSIDENUCLEOTIDE_AND_NUCLEIC_ACID_METABOLIC_PROCESS	REGULATION_OF_TRANSCRIPTION_FROM_RNA_POLYMERASE_II_PROMOTER
SQSTM1	sequestosome 1	TRANSCRIPTION	TRANSCRIPTION_DNA_DEPENDENT	RNA_BIOSYNTHETIC_PROCESS	TRANSCRIPTION_FROM_RNA_POLYMERASE_II_PROMOTER	RNA_METABOLIC_PROCESS	REGULATION_OF_TRANSCRIPTIONDNA_DEPENDENT	REGULATION_OF_RNA_METABOLIC_PROCESS	REGULATION_OF_TRANSCRIPTION	NUCLEOBASENUCLEOSIDENUCLEOTIDE_AND_NUCLEIC_ACID_METABOLIC_PROCESS	REGULATION_OF_TRANSCRIPTION_FROM_RNA_POLYMERASE_II_PROMOTER
BMP6	bone morphogenetic protein 6	TRANSCRIPTION	TRANSCRIPTION_DNA_DEPENDENT	RNA_BIOSYNTHETIC_PROCESS	TRANSCRIPTION_FROM_RNA_POLYMERASE_II_PROMOTER	RNA_METABOLIC_PROCESS	REGULATION_OF_TRANSCRIPTIONDNA_DEPENDENT	REGULATION_OF_RNA_METABOLIC_PROCESS	REGULATION_OF_TRANSCRIPTION	NUCLEOBASENUCLEOSIDENUCLEOTIDE_AND_NUCLEIC_ACID_METABOLIC_PROCESS	REGULATION_OF_TRANSCRIPTION_FROM_RNA_POLYMERASE_II_PROMOTER
NCOA6	nuclear receptor coactivator 6	TRANSCRIPTION	TRANSCRIPTION_DNA_DEPENDENT	RNA_BIOSYNTHETIC_PROCESS	TRANSCRIPTION_FROM_RNA_POLYMERASE_II_PROMOTER	RNA_METABOLIC_PROCESS	REGULATION_OF_TRANSCRIPTIONDNA_DEPENDENT	REGULATION_OF_RNA_METABOLIC_PROCESS	REGULATION_OF_TRANSCRIPTION	NUCLEOBASENUCLEOSIDENUCLEOTIDE_AND_NUCLEIC_ACID_METABOLIC_PROCESS	REGULATION_OF_TRANSCRIPTION_FROM_RNA_POLYMERASE_II_PROMOTER
PLAGL1	pleiomorphic adenoma gene-like 1	TRANSCRIPTION	TRANSCRIPTION_DNA_DEPENDENT	RNA_BIOSYNTHETIC_PROCESS	TRANSCRIPTION_FROM_RNA_POLYMERASE_II_PROMOTER	RNA_METABOLIC_PROCESS	REGULATION_OF_TRANSCRIPTIONDNA_DEPENDENT	REGULATION_OF_RNA_METABOLIC_PROCESS	REGULATION_OF_TRANSCRIPTION	NUCLEOBASENUCLEOSIDENUCLEOTIDE_AND_NUCLEIC_ACID_METABOLIC_PROCESS	REGULATION_OF_TRANSCRIPTION_FROM_RNA_POLYMERASE_II_PROMOTER
HIF1A	hypoxia-inducible factor 1, alpha subunit (basic helix-loop-helix transcription factor)	TRANSCRIPTION	TRANSCRIPTION_DNA_DEPENDENT	RNA_BIOSYNTHETIC_PROCESS	TRANSCRIPTION_FROM_RNA_POLYMERASE_II_PROMOTER	RNA_METABOLIC_PROCESS	REGULATION_OF_TRANSCRIPTIONDNA_DEPENDENT	REGULATION_OF_RNA_METABOLIC_PROCESS	REGULATION_OF_TRANSCRIPTION	NUCLEOBASENUCLEOSIDENUCLEOTIDE_AND_NUCLEIC_ACID_METABOLIC_PROCESS	REGULATION_OF_TRANSCRIPTION_FROM_RNA_POLYMERASE_II_PROMOTER
EPAS1	endothelial PAS domain protein 1	TRANSCRIPTION	TRANSCRIPTION_DNA_DEPENDENT	RNA_BIOSYNTHETIC_PROCESS	TRANSCRIPTION_FROM_RNA_POLYMERASE_II_PROMOTER	RNA_METABOLIC_PROCESS	REGULATION_OF_TRANSCRIPTIONDNA_DEPENDENT	REGULATION_OF_RNA_METABOLIC_PROCESS	REGULATION_OF_TRANSCRIPTION	NUCLEOBASENUCLEOSIDENUCLEOTIDE_AND_NUCLEIC_ACID_METABOLIC_PROCESS	REGULATION_OF_TRANSCRIPTION_FROM_RNA_POLYMERASE_II_PROMOTER
MED12	mediator of RNA polymerase II transcription, subunit 12 homolog (S. cerevisiae)	TRANSCRIPTION	TRANSCRIPTION_DNA_DEPENDENT	RNA_BIOSYNTHETIC_PROCESS	TRANSCRIPTION_FROM_RNA_POLYMERASE_II_PROMOTER	RNA_METABOLIC_PROCESS	REGULATION_OF_TRANSCRIPTIONDNA_DEPENDENT	REGULATION_OF_RNA_METABOLIC_PROCESS	REGULATION_OF_TRANSCRIPTION	NUCLEOBASENUCLEOSIDENUCLEOTIDE_AND_NUCLEIC_ACID_METABOLIC_PROCESS	REGULATION_OF_TRANSCRIPTION_FROM_RNA_POLYMERASE_II_PROMOTER
CLOCK	clock homolog (mouse)	TRANSCRIPTION	TRANSCRIPTION_DNA_DEPENDENT	RNA_BIOSYNTHETIC_PROCESS	TRANSCRIPTION_FROM_RNA_POLYMERASE_II_PROMOTER	RNA_METABOLIC_PROCESS	REGULATION_OF_TRANSCRIPTIONDNA_DEPENDENT	REGULATION_OF_RNA_METABOLIC_PROCESS	REGULATION_OF_TRANSCRIPTION	NUCLEOBASENUCLEOSIDENUCLEOTIDE_AND_NUCLEIC_ACID_METABOLIC_PROCESS	REGULATION_OF_TRANSCRIPTION_FROM_RNA_POLYMERASE_II_PROMOTER
PPARGC1B	peroxisome proliferative activated receptor, gamma, coactivator 1, beta	TRANSCRIPTION	TRANSCRIPTION_DNA_DEPENDENT	RNA_BIOSYNTHETIC_PROCESS	TRANSCRIPTION_FROM_RNA_POLYMERASE_II_PROMOTER	RNA_METABOLIC_PROCESS	REGULATION_OF_TRANSCRIPTIONDNA_DEPENDENT	REGULATION_OF_RNA_METABOLIC_PROCESS	REGULATION_OF_TRANSCRIPTION	NUCLEOBASENUCLEOSIDENUCLEOTIDE_AND_NUCLEIC_ACID_METABOLIC_PROCESS	REGULATION_OF_TRANSCRIPTION_FROM_RNA_POLYMERASE_II_PROMOTER
RUNX1	runt-related transcription factor 1 (acute myeloid leukemia 1; aml1 oncogene)	TRANSCRIPTION	TRANSCRIPTION_DNA_DEPENDENT	RNA_BIOSYNTHETIC_PROCESS	TRANSCRIPTION_FROM_RNA_POLYMERASE_II_PROMOTER	RNA_METABOLIC_PROCESS	REGULATION_OF_TRANSCRIPTIONDNA_DEPENDENT	REGULATION_OF_RNA_METABOLIC_PROCESS	REGULATION_OF_TRANSCRIPTION	NUCLEOBASENUCLEOSIDENUCLEOTIDE_AND_NUCLEIC_ACID_METABOLIC_PROCESS	REGULATION_OF_TRANSCRIPTION_FROM_RNA_POLYMERASE_II_PROMOTER
NUFIP1	nuclear fragile X mental retardation protein interacting protein 1	TRANSCRIPTION	TRANSCRIPTION_DNA_DEPENDENT	RNA_BIOSYNTHETIC_PROCESS	TRANSCRIPTION_FROM_RNA_POLYMERASE_II_PROMOTER	RNA_METABOLIC_PROCESS	REGULATION_OF_TRANSCRIPTIONDNA_DEPENDENT	REGULATION_OF_RNA_METABOLIC_PROCESS	REGULATION_OF_TRANSCRIPTION	NUCLEOBASENUCLEOSIDENUCLEOTIDE_AND_NUCLEIC_ACID_METABOLIC_PROCESS	REGULATION_OF_TRANSCRIPTION_FROM_RNA_POLYMERASE_II_PROMOTER
MAML1	mastermind-like 1 (Drosophila)	TRANSCRIPTION	TRANSCRIPTION_DNA_DEPENDENT	RNA_BIOSYNTHETIC_PROCESS	TRANSCRIPTION_FROM_RNA_POLYMERASE_II_PROMOTER	RNA_METABOLIC_PROCESS	REGULATION_OF_TRANSCRIPTIONDNA_DEPENDENT	REGULATION_OF_RNA_METABOLIC_PROCESS	REGULATION_OF_TRANSCRIPTION	NUCLEOBASENUCLEOSIDENUCLEOTIDE_AND_NUCLEIC_ACID_METABOLIC_PROCESS	REGULATION_OF_TRANSCRIPTION_FROM_RNA_POLYMERASE_II_PROMOTER
MAML2	mastermind-like 2 (Drosophila)	TRANSCRIPTION	TRANSCRIPTION_DNA_DEPENDENT	RNA_BIOSYNTHETIC_PROCESS	TRANSCRIPTION_FROM_RNA_POLYMERASE_II_PROMOTER	RNA_METABOLIC_PROCESS	REGULATION_OF_TRANSCRIPTIONDNA_DEPENDENT	REGULATION_OF_RNA_METABOLIC_PROCESS	REGULATION_OF_TRANSCRIPTION	NUCLEOBASENUCLEOSIDENUCLEOTIDE_AND_NUCLEIC_ACID_METABOLIC_PROCESS	REGULATION_OF_TRANSCRIPTION_FROM_RNA_POLYMERASE_II_PROMOTER
ARNTL	aryl hydrocarbon receptor nuclear translocator-like	TRANSCRIPTION	TRANSCRIPTION_DNA_DEPENDENT	RNA_BIOSYNTHETIC_PROCESS	TRANSCRIPTION_FROM_RNA_POLYMERASE_II_PROMOTER	RNA_METABOLIC_PROCESS	REGULATION_OF_TRANSCRIPTIONDNA_DEPENDENT	REGULATION_OF_RNA_METABOLIC_PROCESS	REGULATION_OF_TRANSCRIPTION	NUCLEOBASENUCLEOSIDENUCLEOTIDE_AND_NUCLEIC_ACID_METABOLIC_PROCESS	REGULATION_OF_TRANSCRIPTION_FROM_RNA_POLYMERASE_II_PROMOTER
RXRA	retinoid X receptor, alpha	TRANSCRIPTION	TRANSCRIPTION_DNA_DEPENDENT	RNA_BIOSYNTHETIC_PROCESS	TRANSCRIPTION_FROM_RNA_POLYMERASE_II_PROMOTER	RNA_METABOLIC_PROCESS	REGULATION_OF_TRANSCRIPTIONDNA_DEPENDENT	REGULATION_OF_RNA_METABOLIC_PROCESS	REGULATION_OF_TRANSCRIPTION	NUCLEOBASENUCLEOSIDENUCLEOTIDE_AND_NUCLEIC_ACID_METABOLIC_PROCESS	REGULATION_OF_TRANSCRIPTION_FROM_RNA_POLYMERASE_II_PROMOTER
ELF4	E74-like factor 4 (ets domain transcription factor)	TRANSCRIPTION	TRANSCRIPTION_DNA_DEPENDENT	RNA_BIOSYNTHETIC_PROCESS	TRANSCRIPTION_FROM_RNA_POLYMERASE_II_PROMOTER	RNA_METABOLIC_PROCESS	REGULATION_OF_TRANSCRIPTIONDNA_DEPENDENT	REGULATION_OF_RNA_METABOLIC_PROCESS	REGULATION_OF_TRANSCRIPTION	NUCLEOBASENUCLEOSIDENUCLEOTIDE_AND_NUCLEIC_ACID_METABOLIC_PROCESS	REGULATION_OF_TRANSCRIPTION_FROM_RNA_POLYMERASE_II_PROMOTER
ATF4	activating transcription factor 4 (tax-responsive enhancer element B67)	TRANSCRIPTION	TRANSCRIPTION_DNA_DEPENDENT	RNA_BIOSYNTHETIC_PROCESS	TRANSCRIPTION_FROM_RNA_POLYMERASE_II_PROMOTER	RNA_METABOLIC_PROCESS	REGULATION_OF_TRANSCRIPTIONDNA_DEPENDENT	REGULATION_OF_RNA_METABOLIC_PROCESS	REGULATION_OF_TRANSCRIPTION	NUCLEOBASENUCLEOSIDENUCLEOTIDE_AND_NUCLEIC_ACID_METABOLIC_PROCESS	REGULATION_OF_TRANSCRIPTION_FROM_RNA_POLYMERASE_II_PROMOTER
NPAS2	neuronal PAS domain protein 2	TRANSCRIPTION	TRANSCRIPTION_DNA_DEPENDENT	RNA_BIOSYNTHETIC_PROCESS	TRANSCRIPTION_FROM_RNA_POLYMERASE_II_PROMOTER	RNA_METABOLIC_PROCESS	REGULATION_OF_TRANSCRIPTIONDNA_DEPENDENT	REGULATION_OF_RNA_METABOLIC_PROCESS	REGULATION_OF_TRANSCRIPTION	NUCLEOBASENUCLEOSIDENUCLEOTIDE_AND_NUCLEIC_ACID_METABOLIC_PROCESS	REGULATION_OF_TRANSCRIPTION_FROM_RNA_POLYMERASE_II_PROMOTER
HNF4A	hepatocyte nuclear factor 4, alpha	TRANSCRIPTION	TRANSCRIPTION_DNA_DEPENDENT	RNA_BIOSYNTHETIC_PROCESS	TRANSCRIPTION_FROM_RNA_POLYMERASE_II_PROMOTER	RNA_METABOLIC_PROCESS	REGULATION_OF_TRANSCRIPTIONDNA_DEPENDENT	REGULATION_OF_RNA_METABOLIC_PROCESS	REGULATION_OF_TRANSCRIPTION	NUCLEOBASENUCLEOSIDENUCLEOTIDE_AND_NUCLEIC_ACID_METABOLIC_PROCESS	REGULATION_OF_TRANSCRIPTION_FROM_RNA_POLYMERASE_II_PROMOTER
TFAP2B	transcription factor AP-2 beta (activating enhancer binding protein 2 beta)	TRANSCRIPTION	TRANSCRIPTION_DNA_DEPENDENT	RNA_BIOSYNTHETIC_PROCESS	TRANSCRIPTION_FROM_RNA_POLYMERASE_II_PROMOTER	RNA_METABOLIC_PROCESS	REGULATION_OF_TRANSCRIPTIONDNA_DEPENDENT	REGULATION_OF_RNA_METABOLIC_PROCESS	REGULATION_OF_TRANSCRIPTION	NUCLEOBASENUCLEOSIDENUCLEOTIDE_AND_NUCLEIC_ACID_METABOLIC_PROCESS	REGULATION_OF_TRANSCRIPTION_FROM_RNA_POLYMERASE_II_PROMOTER
ELF1	E74-like factor 1 (ets domain transcription factor)	TRANSCRIPTION	TRANSCRIPTION_DNA_DEPENDENT	RNA_BIOSYNTHETIC_PROCESS	TRANSCRIPTION_FROM_RNA_POLYMERASE_II_PROMOTER	RNA_METABOLIC_PROCESS	REGULATION_OF_TRANSCRIPTIONDNA_DEPENDENT	REGULATION_OF_RNA_METABOLIC_PROCESS	REGULATION_OF_TRANSCRIPTION	NUCLEOBASENUCLEOSIDENUCLEOTIDE_AND_NUCLEIC_ACID_METABOLIC_PROCESS	REGULATION_OF_TRANSCRIPTION_FROM_RNA_POLYMERASE_II_PROMOTER
MED6	mediator of RNA polymerase II transcription, subunit 6 homolog (S. cerevisiae)	TRANSCRIPTION	TRANSCRIPTION_DNA_DEPENDENT	RNA_BIOSYNTHETIC_PROCESS	TRANSCRIPTION_FROM_RNA_POLYMERASE_II_PROMOTER	RNA_METABOLIC_PROCESS	REGULATION_OF_TRANSCRIPTIONDNA_DEPENDENT	REGULATION_OF_RNA_METABOLIC_PROCESS	REGULATION_OF_TRANSCRIPTION	NUCLEOBASENUCLEOSIDENUCLEOTIDE_AND_NUCLEIC_ACID_METABOLIC_PROCESS	REGULATION_OF_TRANSCRIPTION_FROM_RNA_POLYMERASE_II_PROMOTER
PRPF6	PRP6 pre-mRNA processing factor 6 homolog (S. cerevisiae)	TRANSCRIPTION	TRANSCRIPTION_DNA_DEPENDENT	RNA_BIOSYNTHETIC_PROCESS	TRANSCRIPTION_FROM_RNA_POLYMERASE_II_PROMOTER	RNA_METABOLIC_PROCESS	REGULATION_OF_TRANSCRIPTIONDNA_DEPENDENT	REGULATION_OF_RNA_METABOLIC_PROCESS	REGULATION_OF_TRANSCRIPTION	NUCLEOBASENUCLEOSIDENUCLEOTIDE_AND_NUCLEIC_ACID_METABOLIC_PROCESS	REGULATION_OF_TRANSCRIPTION_FROM_RNA_POLYMERASE_II_PROMOTER
SP1	Sp1 transcription factor	TRANSCRIPTION	TRANSCRIPTION_DNA_DEPENDENT	RNA_BIOSYNTHETIC_PROCESS	TRANSCRIPTION_FROM_RNA_POLYMERASE_II_PROMOTER	RNA_METABOLIC_PROCESS	REGULATION_OF_TRANSCRIPTIONDNA_DEPENDENT	REGULATION_OF_RNA_METABOLIC_PROCESS	REGULATION_OF_TRANSCRIPTION	NUCLEOBASENUCLEOSIDENUCLEOTIDE_AND_NUCLEIC_ACID_METABOLIC_PROCESS	REGULATION_OF_TRANSCRIPTION_FROM_RNA_POLYMERASE_II_PROMOTER
SMARCD1	SWI/SNF related, matrix associated, actin dependent regulator of chromatin, subfamily d, member 1	TRANSCRIPTION	TRANSCRIPTION_DNA_DEPENDENT	RNA_BIOSYNTHETIC_PROCESS	TRANSCRIPTION_FROM_RNA_POLYMERASE_II_PROMOTER	RNA_METABOLIC_PROCESS	REGULATION_OF_TRANSCRIPTIONDNA_DEPENDENT	REGULATION_OF_RNA_METABOLIC_PROCESS	REGULATION_OF_TRANSCRIPTION	NUCLEOBASENUCLEOSIDENUCLEOTIDE_AND_NUCLEIC_ACID_METABOLIC_PROCESS	REGULATION_OF_TRANSCRIPTION_FROM_RNA_POLYMERASE_II_PROMOTER
SMARCC1	SWI/SNF related, matrix associated, actin dependent regulator of chromatin, subfamily c, member 1	TRANSCRIPTION	TRANSCRIPTION_DNA_DEPENDENT	RNA_BIOSYNTHETIC_PROCESS	TRANSCRIPTION_FROM_RNA_POLYMERASE_II_PROMOTER	RNA_METABOLIC_PROCESS	REGULATION_OF_TRANSCRIPTIONDNA_DEPENDENT	REGULATION_OF_RNA_METABOLIC_PROCESS	REGULATION_OF_TRANSCRIPTION	NUCLEOBASENUCLEOSIDENUCLEOTIDE_AND_NUCLEIC_ACID_METABOLIC_PROCESS	REGULATION_OF_TRANSCRIPTION_FROM_RNA_POLYMERASE_II_PROMOTER
CITED2	Cbp/p300-interacting transactivator, with Glu/Asp-rich carboxy-terminal domain, 2	TRANSCRIPTION	TRANSCRIPTION_DNA_DEPENDENT	RNA_BIOSYNTHETIC_PROCESS	TRANSCRIPTION_FROM_RNA_POLYMERASE_II_PROMOTER	RNA_METABOLIC_PROCESS	REGULATION_OF_TRANSCRIPTIONDNA_DEPENDENT	REGULATION_OF_RNA_METABOLIC_PROCESS	REGULATION_OF_TRANSCRIPTION	NUCLEOBASENUCLEOSIDENUCLEOTIDE_AND_NUCLEIC_ACID_METABOLIC_PROCESS	REGULATION_OF_TRANSCRIPTION_FROM_RNA_POLYMERASE_II_PROMOTER
SMARCD3	SWI/SNF related, matrix associated, actin dependent regulator of chromatin, subfamily d, member 3	TRANSCRIPTION	TRANSCRIPTION_DNA_DEPENDENT	RNA_BIOSYNTHETIC_PROCESS	TRANSCRIPTION_FROM_RNA_POLYMERASE_II_PROMOTER	RNA_METABOLIC_PROCESS	REGULATION_OF_TRANSCRIPTIONDNA_DEPENDENT	REGULATION_OF_RNA_METABOLIC_PROCESS	REGULATION_OF_TRANSCRIPTION	NUCLEOBASENUCLEOSIDENUCLEOTIDE_AND_NUCLEIC_ACID_METABOLIC_PROCESS	REGULATION_OF_TRANSCRIPTION_FROM_RNA_POLYMERASE_II_PROMOTER
CEBPG	CCAAT/enhancer binding protein (C/EBP), gamma	TRANSCRIPTION	TRANSCRIPTION_DNA_DEPENDENT	RNA_BIOSYNTHETIC_PROCESS	TRANSCRIPTION_FROM_RNA_POLYMERASE_II_PROMOTER	RNA_METABOLIC_PROCESS	REGULATION_OF_TRANSCRIPTIONDNA_DEPENDENT	REGULATION_OF_RNA_METABOLIC_PROCESS	REGULATION_OF_TRANSCRIPTION	NUCLEOBASENUCLEOSIDENUCLEOTIDE_AND_NUCLEIC_ACID_METABOLIC_PROCESS	REGULATION_OF_TRANSCRIPTION_FROM_RNA_POLYMERASE_II_PROMOTER
HMGB2	high-mobility group box 2	TRANSCRIPTION	TRANSCRIPTION_DNA_DEPENDENT	RNA_BIOSYNTHETIC_PROCESS	TRANSCRIPTION_FROM_RNA_POLYMERASE_II_PROMOTER	RNA_METABOLIC_PROCESS	REGULATION_OF_TRANSCRIPTIONDNA_DEPENDENT	REGULATION_OF_RNA_METABOLIC_PROCESS	REGULATION_OF_TRANSCRIPTION	NUCLEOBASENUCLEOSIDENUCLEOTIDE_AND_NUCLEIC_ACID_METABOLIC_PROCESS	REGULATION_OF_TRANSCRIPTION_FROM_RNA_POLYMERASE_II_PROMOTER
FOS	v-fos FBJ murine osteosarcoma viral oncogene homolog	TRANSCRIPTION	TRANSCRIPTION_DNA_DEPENDENT	RNA_BIOSYNTHETIC_PROCESS	TRANSCRIPTION_FROM_RNA_POLYMERASE_II_PROMOTER	RNA_METABOLIC_PROCESS	REGULATION_OF_TRANSCRIPTIONDNA_DEPENDENT	REGULATION_OF_RNA_METABOLIC_PROCESS	REGULATION_OF_TRANSCRIPTION	NUCLEOBASENUCLEOSIDENUCLEOTIDE_AND_NUCLEIC_ACID_METABOLIC_PROCESS	REGULATION_OF_TRANSCRIPTION_FROM_RNA_POLYMERASE_II_PROMOTER
NR5A1	nuclear receptor subfamily 5, group A, member 1	TRANSCRIPTION	TRANSCRIPTION_DNA_DEPENDENT	RNA_BIOSYNTHETIC_PROCESS	TRANSCRIPTION_FROM_RNA_POLYMERASE_II_PROMOTER	RNA_METABOLIC_PROCESS	REGULATION_OF_TRANSCRIPTIONDNA_DEPENDENT	REGULATION_OF_RNA_METABOLIC_PROCESS	REGULATION_OF_TRANSCRIPTION	NUCLEOBASENUCLEOSIDENUCLEOTIDE_AND_NUCLEIC_ACID_METABOLIC_PROCESS	REGULATION_OF_TRANSCRIPTION_FROM_RNA_POLYMERASE_II_PROMOTER
RNF14	ring finger protein 14	TRANSCRIPTION	TRANSCRIPTION_DNA_DEPENDENT	RNA_BIOSYNTHETIC_PROCESS	TRANSCRIPTION_FROM_RNA_POLYMERASE_II_PROMOTER	RNA_METABOLIC_PROCESS	REGULATION_OF_TRANSCRIPTIONDNA_DEPENDENT	REGULATION_OF_RNA_METABOLIC_PROCESS	REGULATION_OF_TRANSCRIPTION	NUCLEOBASENUCLEOSIDENUCLEOTIDE_AND_NUCLEIC_ACID_METABOLIC_PROCESS	REGULATION_OF_TRANSCRIPTION_FROM_RNA_POLYMERASE_II_PROMOTER
SMARCB1	SWI/SNF related, matrix associated, actin dependent regulator of chromatin, subfamily b, member 1	TRANSCRIPTION	TRANSCRIPTION_DNA_DEPENDENT	RNA_BIOSYNTHETIC_PROCESS	TRANSCRIPTION_FROM_RNA_POLYMERASE_II_PROMOTER	RNA_METABOLIC_PROCESS	REGULATION_OF_TRANSCRIPTIONDNA_DEPENDENT	REGULATION_OF_RNA_METABOLIC_PROCESS	REGULATION_OF_TRANSCRIPTION	NUCLEOBASENUCLEOSIDENUCLEOTIDE_AND_NUCLEIC_ACID_METABOLIC_PROCESS	REGULATION_OF_TRANSCRIPTION_FROM_RNA_POLYMERASE_II_PROMOTER
GFI1	growth factor independent 1	TRANSCRIPTION	TRANSCRIPTION_DNA_DEPENDENT	RNA_BIOSYNTHETIC_PROCESS	TRANSCRIPTION_FROM_RNA_POLYMERASE_II_PROMOTER	RNA_METABOLIC_PROCESS	REGULATION_OF_TRANSCRIPTIONDNA_DEPENDENT	REGULATION_OF_RNA_METABOLIC_PROCESS	REGULATION_OF_TRANSCRIPTION	NUCLEOBASENUCLEOSIDENUCLEOTIDE_AND_NUCLEIC_ACID_METABOLIC_PROCESS	REGULATION_OF_TRANSCRIPTION_FROM_RNA_POLYMERASE_II_PROMOTER
JMY	-	TRANSCRIPTION	TRANSCRIPTION_DNA_DEPENDENT	RNA_BIOSYNTHETIC_PROCESS	TRANSCRIPTION_FROM_RNA_POLYMERASE_II_PROMOTER	RNA_METABOLIC_PROCESS	REGULATION_OF_TRANSCRIPTIONDNA_DEPENDENT	REGULATION_OF_RNA_METABOLIC_PROCESS	REGULATION_OF_TRANSCRIPTION	NUCLEOBASENUCLEOSIDENUCLEOTIDE_AND_NUCLEIC_ACID_METABOLIC_PROCESS	REGULATION_OF_TRANSCRIPTION_FROM_RNA_POLYMERASE_II_PROMOTER
MYC	v-myc myelocytomatosis viral oncogene homolog (avian)	TRANSCRIPTION	TRANSCRIPTION_DNA_DEPENDENT	RNA_BIOSYNTHETIC_PROCESS	TRANSCRIPTION_FROM_RNA_POLYMERASE_II_PROMOTER	RNA_METABOLIC_PROCESS	REGULATION_OF_TRANSCRIPTIONDNA_DEPENDENT	REGULATION_OF_RNA_METABOLIC_PROCESS	REGULATION_OF_TRANSCRIPTION	NUCLEOBASENUCLEOSIDENUCLEOTIDE_AND_NUCLEIC_ACID_METABOLIC_PROCESS	REGULATION_OF_TRANSCRIPTION_FROM_RNA_POLYMERASE_II_PROMOTER
SREBF1	sterol regulatory element binding transcription factor 1	TRANSCRIPTION	TRANSCRIPTION_DNA_DEPENDENT	RNA_BIOSYNTHETIC_PROCESS	TRANSCRIPTION_FROM_RNA_POLYMERASE_II_PROMOTER	RNA_METABOLIC_PROCESS	REGULATION_OF_TRANSCRIPTIONDNA_DEPENDENT	REGULATION_OF_RNA_METABOLIC_PROCESS	REGULATION_OF_TRANSCRIPTION	NUCLEOBASENUCLEOSIDENUCLEOTIDE_AND_NUCLEIC_ACID_METABOLIC_PROCESS	REGULATION_OF_TRANSCRIPTION_FROM_RNA_POLYMERASE_II_PROMOTER
ZNF76	zinc finger protein 76 (expressed in testis)	TRANSCRIPTION	TRANSCRIPTION_DNA_DEPENDENT	RNA_BIOSYNTHETIC_PROCESS	TRANSCRIPTION_FROM_RNA_POLYMERASE_II_PROMOTER	RNA_METABOLIC_PROCESS	REGULATION_OF_TRANSCRIPTIONDNA_DEPENDENT	REGULATION_OF_RNA_METABOLIC_PROCESS	REGULATION_OF_TRANSCRIPTION	NUCLEOBASENUCLEOSIDENUCLEOTIDE_AND_NUCLEIC_ACID_METABOLIC_PROCESS	REGULATION_OF_TRANSCRIPTION_FROM_RNA_POLYMERASE_II_PROMOTER
PBX1	pre-B-cell leukemia transcription factor 1	TRANSCRIPTION	TRANSCRIPTION_DNA_DEPENDENT	RNA_BIOSYNTHETIC_PROCESS	TRANSCRIPTION_FROM_RNA_POLYMERASE_II_PROMOTER	RNA_METABOLIC_PROCESS	REGULATION_OF_TRANSCRIPTIONDNA_DEPENDENT	REGULATION_OF_RNA_METABOLIC_PROCESS	REGULATION_OF_TRANSCRIPTION	NUCLEOBASENUCLEOSIDENUCLEOTIDE_AND_NUCLEIC_ACID_METABOLIC_PROCESS	REGULATION_OF_TRANSCRIPTION_FROM_RNA_POLYMERASE_II_PROMOTER
TARBP2	Tar (HIV-1) RNA binding protein 2	TRANSCRIPTION	TRANSCRIPTION_DNA_DEPENDENT	RNA_BIOSYNTHETIC_PROCESS	TRANSCRIPTION_FROM_RNA_POLYMERASE_II_PROMOTER	RNA_METABOLIC_PROCESS	REGULATION_OF_TRANSCRIPTIONDNA_DEPENDENT	REGULATION_OF_RNA_METABOLIC_PROCESS	REGULATION_OF_TRANSCRIPTION	NUCLEOBASENUCLEOSIDENUCLEOTIDE_AND_NUCLEIC_ACID_METABOLIC_PROCESS	REGULATION_OF_TRANSCRIPTION_FROM_RNA_POLYMERASE_II_PROMOTER
PPARG	peroxisome proliferative activated receptor, gamma	TRANSCRIPTION	TRANSCRIPTION_DNA_DEPENDENT	RNA_BIOSYNTHETIC_PROCESS	TRANSCRIPTION_FROM_RNA_POLYMERASE_II_PROMOTER	RNA_METABOLIC_PROCESS	REGULATION_OF_TRANSCRIPTIONDNA_DEPENDENT	REGULATION_OF_RNA_METABOLIC_PROCESS	REGULATION_OF_TRANSCRIPTION	NUCLEOBASENUCLEOSIDENUCLEOTIDE_AND_NUCLEIC_ACID_METABOLIC_PROCESS	REGULATION_OF_TRANSCRIPTION_FROM_RNA_POLYMERASE_II_PROMOTER
NFYC	nuclear transcription factor Y, gamma	TRANSCRIPTION	TRANSCRIPTION_DNA_DEPENDENT	RNA_BIOSYNTHETIC_PROCESS	TRANSCRIPTION_FROM_RNA_POLYMERASE_II_PROMOTER	RNA_METABOLIC_PROCESS	REGULATION_OF_TRANSCRIPTIONDNA_DEPENDENT	REGULATION_OF_RNA_METABOLIC_PROCESS	REGULATION_OF_TRANSCRIPTION	NUCLEOBASENUCLEOSIDENUCLEOTIDE_AND_NUCLEIC_ACID_METABOLIC_PROCESS	REGULATION_OF_TRANSCRIPTION_FROM_RNA_POLYMERASE_II_PROMOTER
IKZF3	IKAROS family zinc finger 3 (Aiolos)	TRANSCRIPTION	TRANSCRIPTION_DNA_DEPENDENT	RNA_BIOSYNTHETIC_PROCESS	TRANSCRIPTION_FROM_RNA_POLYMERASE_II_PROMOTER	RNA_METABOLIC_PROCESS	REGULATION_OF_TRANSCRIPTIONDNA_DEPENDENT	REGULATION_OF_RNA_METABOLIC_PROCESS	REGULATION_OF_TRANSCRIPTION	NUCLEOBASENUCLEOSIDENUCLEOTIDE_AND_NUCLEIC_ACID_METABOLIC_PROCESS	REGULATION_OF_TRANSCRIPTION_FROM_RNA_POLYMERASE_II_PROMOTER
FOSL1	FOS-like antigen 1	TRANSCRIPTION	TRANSCRIPTION_DNA_DEPENDENT	RNA_BIOSYNTHETIC_PROCESS	TRANSCRIPTION_FROM_RNA_POLYMERASE_II_PROMOTER	RNA_METABOLIC_PROCESS	REGULATION_OF_TRANSCRIPTIONDNA_DEPENDENT	REGULATION_OF_RNA_METABOLIC_PROCESS	REGULATION_OF_TRANSCRIPTION	NUCLEOBASENUCLEOSIDENUCLEOTIDE_AND_NUCLEIC_ACID_METABOLIC_PROCESS	REGULATION_OF_TRANSCRIPTION_FROM_RNA_POLYMERASE_II_PROMOTER
SOD2	superoxide dismutase 2, mitochondrial	TRANSCRIPTION	TRANSCRIPTION_DNA_DEPENDENT	RNA_BIOSYNTHETIC_PROCESS	TRANSCRIPTION_FROM_RNA_POLYMERASE_II_PROMOTER	RNA_METABOLIC_PROCESS	REGULATION_OF_TRANSCRIPTIONDNA_DEPENDENT	REGULATION_OF_RNA_METABOLIC_PROCESS	REGULATION_OF_TRANSCRIPTION	NUCLEOBASENUCLEOSIDENUCLEOTIDE_AND_NUCLEIC_ACID_METABOLIC_PROCESS	REGULATION_OF_TRANSCRIPTION_FROM_RNA_POLYMERASE_II_PROMOTER
MYOD1	myogenic differentiation 1	TRANSCRIPTION	TRANSCRIPTION_DNA_DEPENDENT	RNA_BIOSYNTHETIC_PROCESS	TRANSCRIPTION_FROM_RNA_POLYMERASE_II_PROMOTER	RNA_METABOLIC_PROCESS	REGULATION_OF_TRANSCRIPTIONDNA_DEPENDENT	REGULATION_OF_RNA_METABOLIC_PROCESS	REGULATION_OF_TRANSCRIPTION	NUCLEOBASENUCLEOSIDENUCLEOTIDE_AND_NUCLEIC_ACID_METABOLIC_PROCESS	REGULATION_OF_TRANSCRIPTION_FROM_RNA_POLYMERASE_II_PROMOTER
IKBKAP	inhibitor of kappa light polypeptide gene enhancer in B-cells, kinase complex-associated protein	TRANSCRIPTION	TRANSCRIPTION_DNA_DEPENDENT	RNA_BIOSYNTHETIC_PROCESS	TRANSCRIPTION_FROM_RNA_POLYMERASE_II_PROMOTER	RNA_METABOLIC_PROCESS	REGULATION_OF_TRANSCRIPTIONDNA_DEPENDENT	REGULATION_OF_RNA_METABOLIC_PROCESS	REGULATION_OF_TRANSCRIPTION	NUCLEOBASENUCLEOSIDENUCLEOTIDE_AND_NUCLEIC_ACID_METABOLIC_PROCESS	REGULATION_OF_TRANSCRIPTION_FROM_RNA_POLYMERASE_II_PROMOTER
LITAF	lipopolysaccharide-induced TNF factor	TRANSCRIPTION	TRANSCRIPTION_DNA_DEPENDENT	RNA_BIOSYNTHETIC_PROCESS	TRANSCRIPTION_FROM_RNA_POLYMERASE_II_PROMOTER	RNA_METABOLIC_PROCESS	REGULATION_OF_TRANSCRIPTIONDNA_DEPENDENT	REGULATION_OF_RNA_METABOLIC_PROCESS	REGULATION_OF_TRANSCRIPTION	NUCLEOBASENUCLEOSIDENUCLEOTIDE_AND_NUCLEIC_ACID_METABOLIC_PROCESS	REGULATION_OF_TRANSCRIPTION_FROM_RNA_POLYMERASE_II_PROMOTER
TCF12	transcription factor 12 (HTF4, helix-loop-helix transcription factors 4)	TRANSCRIPTION	TRANSCRIPTION_DNA_DEPENDENT	RNA_BIOSYNTHETIC_PROCESS	TRANSCRIPTION_FROM_RNA_POLYMERASE_II_PROMOTER	RNA_METABOLIC_PROCESS	REGULATION_OF_TRANSCRIPTIONDNA_DEPENDENT	REGULATION_OF_RNA_METABOLIC_PROCESS	REGULATION_OF_TRANSCRIPTION	NUCLEOBASENUCLEOSIDENUCLEOTIDE_AND_NUCLEIC_ACID_METABOLIC_PROCESS	REGULATION_OF_TRANSCRIPTION_FROM_RNA_POLYMERASE_II_PROMOTER
NFE2	nuclear factor (erythroid-derived 2), 45kDa	TRANSCRIPTION	TRANSCRIPTION_DNA_DEPENDENT	RNA_BIOSYNTHETIC_PROCESS	TRANSCRIPTION_FROM_RNA_POLYMERASE_II_PROMOTER	RNA_METABOLIC_PROCESS	REGULATION_OF_TRANSCRIPTIONDNA_DEPENDENT	REGULATION_OF_RNA_METABOLIC_PROCESS	REGULATION_OF_TRANSCRIPTION	NUCLEOBASENUCLEOSIDENUCLEOTIDE_AND_NUCLEIC_ACID_METABOLIC_PROCESS	REGULATION_OF_TRANSCRIPTION_FROM_RNA_POLYMERASE_II_PROMOTER
NRF1	nuclear respiratory factor 1	TRANSCRIPTION	TRANSCRIPTION_DNA_DEPENDENT	RNA_BIOSYNTHETIC_PROCESS	TRANSCRIPTION_FROM_RNA_POLYMERASE_II_PROMOTER	RNA_METABOLIC_PROCESS	REGULATION_OF_TRANSCRIPTIONDNA_DEPENDENT	REGULATION_OF_RNA_METABOLIC_PROCESS	REGULATION_OF_TRANSCRIPTION	NUCLEOBASENUCLEOSIDENUCLEOTIDE_AND_NUCLEIC_ACID_METABOLIC_PROCESS	REGULATION_OF_TRANSCRIPTION_FROM_RNA_POLYMERASE_II_PROMOTER
TFDP1	transcription factor Dp-1	TRANSCRIPTION	TRANSCRIPTION_DNA_DEPENDENT	RNA_BIOSYNTHETIC_PROCESS	TRANSCRIPTION_FROM_RNA_POLYMERASE_II_PROMOTER	RNA_METABOLIC_PROCESS	REGULATION_OF_TRANSCRIPTIONDNA_DEPENDENT	REGULATION_OF_RNA_METABOLIC_PROCESS	REGULATION_OF_TRANSCRIPTION	NUCLEOBASENUCLEOSIDENUCLEOTIDE_AND_NUCLEIC_ACID_METABOLIC_PROCESS	REGULATION_OF_TRANSCRIPTION_FROM_RNA_POLYMERASE_II_PROMOTER
HIRA	HIR histone cell cycle regulation defective homolog A (S. cerevisiae)	TRANSCRIPTION	TRANSCRIPTION_DNA_DEPENDENT	RNA_BIOSYNTHETIC_PROCESS	TRANSCRIPTION_FROM_RNA_POLYMERASE_II_PROMOTER	RNA_METABOLIC_PROCESS	REGULATION_OF_TRANSCRIPTIONDNA_DEPENDENT	REGULATION_OF_RNA_METABOLIC_PROCESS	REGULATION_OF_TRANSCRIPTION	NUCLEOBASENUCLEOSIDENUCLEOTIDE_AND_NUCLEIC_ACID_METABOLIC_PROCESS	REGULATION_OF_TRANSCRIPTION_FROM_RNA_POLYMERASE_II_PROMOTER
TBX19	T-box 19	TRANSCRIPTION	TRANSCRIPTION_DNA_DEPENDENT	RNA_BIOSYNTHETIC_PROCESS	TRANSCRIPTION_FROM_RNA_POLYMERASE_II_PROMOTER	RNA_METABOLIC_PROCESS	REGULATION_OF_TRANSCRIPTIONDNA_DEPENDENT	REGULATION_OF_RNA_METABOLIC_PROCESS	REGULATION_OF_TRANSCRIPTION	NUCLEOBASENUCLEOSIDENUCLEOTIDE_AND_NUCLEIC_ACID_METABOLIC_PROCESS	REGULATION_OF_TRANSCRIPTION_FROM_RNA_POLYMERASE_II_PROMOTER
ZNF354A	zinc finger protein 354A	TRANSCRIPTION	TRANSCRIPTION_DNA_DEPENDENT	RNA_BIOSYNTHETIC_PROCESS	TRANSCRIPTION_FROM_RNA_POLYMERASE_II_PROMOTER	RNA_METABOLIC_PROCESS	REGULATION_OF_TRANSCRIPTIONDNA_DEPENDENT	REGULATION_OF_RNA_METABOLIC_PROCESS	REGULATION_OF_TRANSCRIPTION	NUCLEOBASENUCLEOSIDENUCLEOTIDE_AND_NUCLEIC_ACID_METABOLIC_PROCESS	REGULATION_OF_TRANSCRIPTION_FROM_RNA_POLYMERASE_II_PROMOTER
NR2F2	nuclear receptor subfamily 2, group F, member 2	TRANSCRIPTION	TRANSCRIPTION_DNA_DEPENDENT	RNA_BIOSYNTHETIC_PROCESS	TRANSCRIPTION_FROM_RNA_POLYMERASE_II_PROMOTER	RNA_METABOLIC_PROCESS	REGULATION_OF_TRANSCRIPTIONDNA_DEPENDENT	REGULATION_OF_RNA_METABOLIC_PROCESS	REGULATION_OF_TRANSCRIPTION	NUCLEOBASENUCLEOSIDENUCLEOTIDE_AND_NUCLEIC_ACID_METABOLIC_PROCESS	REGULATION_OF_TRANSCRIPTION_FROM_RNA_POLYMERASE_II_PROMOTER
SREBF2	sterol regulatory element binding transcription factor 2	TRANSCRIPTION	TRANSCRIPTION_DNA_DEPENDENT	RNA_BIOSYNTHETIC_PROCESS	TRANSCRIPTION_FROM_RNA_POLYMERASE_II_PROMOTER	RNA_METABOLIC_PROCESS	REGULATION_OF_TRANSCRIPTIONDNA_DEPENDENT	REGULATION_OF_RNA_METABOLIC_PROCESS	REGULATION_OF_TRANSCRIPTION	NUCLEOBASENUCLEOSIDENUCLEOTIDE_AND_NUCLEIC_ACID_METABOLIC_PROCESS	REGULATION_OF_TRANSCRIPTION_FROM_RNA_POLYMERASE_II_PROMOTER
FOSL2	FOS-like antigen 2	TRANSCRIPTION	TRANSCRIPTION_DNA_DEPENDENT	RNA_BIOSYNTHETIC_PROCESS	TRANSCRIPTION_FROM_RNA_POLYMERASE_II_PROMOTER	RNA_METABOLIC_PROCESS	REGULATION_OF_TRANSCRIPTIONDNA_DEPENDENT	REGULATION_OF_RNA_METABOLIC_PROCESS	REGULATION_OF_TRANSCRIPTION	NUCLEOBASENUCLEOSIDENUCLEOTIDE_AND_NUCLEIC_ACID_METABOLIC_PROCESS	REGULATION_OF_TRANSCRIPTION_FROM_RNA_POLYMERASE_II_PROMOTER
TFAP2C	transcription factor AP-2 gamma (activating enhancer binding protein 2 gamma)	TRANSCRIPTION	TRANSCRIPTION_DNA_DEPENDENT	RNA_BIOSYNTHETIC_PROCESS	TRANSCRIPTION_FROM_RNA_POLYMERASE_II_PROMOTER	RNA_METABOLIC_PROCESS	REGULATION_OF_TRANSCRIPTIONDNA_DEPENDENT	REGULATION_OF_RNA_METABOLIC_PROCESS	REGULATION_OF_TRANSCRIPTION	NUCLEOBASENUCLEOSIDENUCLEOTIDE_AND_NUCLEIC_ACID_METABOLIC_PROCESS	REGULATION_OF_TRANSCRIPTION_FROM_RNA_POLYMERASE_II_PROMOTER
NEUROG1	neurogenin 1	TRANSCRIPTION	TRANSCRIPTION_DNA_DEPENDENT	RNA_BIOSYNTHETIC_PROCESS	TRANSCRIPTION_FROM_RNA_POLYMERASE_II_PROMOTER	RNA_METABOLIC_PROCESS	REGULATION_OF_TRANSCRIPTIONDNA_DEPENDENT	REGULATION_OF_RNA_METABOLIC_PROCESS	REGULATION_OF_TRANSCRIPTION	NUCLEOBASENUCLEOSIDENUCLEOTIDE_AND_NUCLEIC_ACID_METABOLIC_PROCESS	REGULATION_OF_TRANSCRIPTION_FROM_RNA_POLYMERASE_II_PROMOTER
GATA1	GATA binding protein 1 (globin transcription factor 1)	TRANSCRIPTION	TRANSCRIPTION_DNA_DEPENDENT	RNA_BIOSYNTHETIC_PROCESS	TRANSCRIPTION_FROM_RNA_POLYMERASE_II_PROMOTER	RNA_METABOLIC_PROCESS	REGULATION_OF_TRANSCRIPTIONDNA_DEPENDENT	REGULATION_OF_RNA_METABOLIC_PROCESS	REGULATION_OF_TRANSCRIPTION	NUCLEOBASENUCLEOSIDENUCLEOTIDE_AND_NUCLEIC_ACID_METABOLIC_PROCESS	REGULATION_OF_TRANSCRIPTION_FROM_RNA_POLYMERASE_II_PROMOTER
HOXC6	homeobox C6	TRANSCRIPTION	TRANSCRIPTION_DNA_DEPENDENT	RNA_BIOSYNTHETIC_PROCESS	TRANSCRIPTION_FROM_RNA_POLYMERASE_II_PROMOTER	RNA_METABOLIC_PROCESS	REGULATION_OF_TRANSCRIPTIONDNA_DEPENDENT	REGULATION_OF_RNA_METABOLIC_PROCESS	REGULATION_OF_TRANSCRIPTION	NUCLEOBASENUCLEOSIDENUCLEOTIDE_AND_NUCLEIC_ACID_METABOLIC_PROCESS	REGULATION_OF_TRANSCRIPTION_FROM_RNA_POLYMERASE_II_PROMOTER
BRIP1	BRCA1 interacting protein C-terminal helicase 1	TRANSCRIPTION	TRANSCRIPTION_DNA_DEPENDENT	RNA_BIOSYNTHETIC_PROCESS	TRANSCRIPTION_FROM_RNA_POLYMERASE_II_PROMOTER	RNA_METABOLIC_PROCESS	REGULATION_OF_TRANSCRIPTIONDNA_DEPENDENT	REGULATION_OF_RNA_METABOLIC_PROCESS	REGULATION_OF_TRANSCRIPTION	NUCLEOBASENUCLEOSIDENUCLEOTIDE_AND_NUCLEIC_ACID_METABOLIC_PROCESS	REGULATION_OF_TRANSCRIPTION_FROM_RNA_POLYMERASE_II_PROMOTER
CHD1	chromodomain helicase DNA binding protein 1	TRANSCRIPTION	TRANSCRIPTION_DNA_DEPENDENT	RNA_BIOSYNTHETIC_PROCESS	TRANSCRIPTION_FROM_RNA_POLYMERASE_II_PROMOTER	RNA_METABOLIC_PROCESS	REGULATION_OF_TRANSCRIPTIONDNA_DEPENDENT	REGULATION_OF_RNA_METABOLIC_PROCESS	REGULATION_OF_TRANSCRIPTION	NUCLEOBASENUCLEOSIDENUCLEOTIDE_AND_NUCLEIC_ACID_METABOLIC_PROCESS	REGULATION_OF_TRANSCRIPTION_FROM_RNA_POLYMERASE_II_PROMOTER
CHD2	chromodomain helicase DNA binding protein 2	TRANSCRIPTION	TRANSCRIPTION_DNA_DEPENDENT	RNA_BIOSYNTHETIC_PROCESS	TRANSCRIPTION_FROM_RNA_POLYMERASE_II_PROMOTER	RNA_METABOLIC_PROCESS	REGULATION_OF_TRANSCRIPTIONDNA_DEPENDENT	REGULATION_OF_RNA_METABOLIC_PROCESS	REGULATION_OF_TRANSCRIPTION	NUCLEOBASENUCLEOSIDENUCLEOTIDE_AND_NUCLEIC_ACID_METABOLIC_PROCESS	REGULATION_OF_TRANSCRIPTION_FROM_RNA_POLYMERASE_II_PROMOTER
CHD4	chromodomain helicase DNA binding protein 4	TRANSCRIPTION	TRANSCRIPTION_DNA_DEPENDENT	RNA_BIOSYNTHETIC_PROCESS	TRANSCRIPTION_FROM_RNA_POLYMERASE_II_PROMOTER	RNA_METABOLIC_PROCESS	REGULATION_OF_TRANSCRIPTIONDNA_DEPENDENT	REGULATION_OF_RNA_METABOLIC_PROCESS	REGULATION_OF_TRANSCRIPTION	NUCLEOBASENUCLEOSIDENUCLEOTIDE_AND_NUCLEIC_ACID_METABOLIC_PROCESS	REGULATION_OF_TRANSCRIPTION_FROM_RNA_POLYMERASE_II_PROMOTER
CITED1	Cbp/p300-interacting transactivator, with Glu/Asp-rich carboxy-terminal domain, 1	TRANSCRIPTION	TRANSCRIPTION_DNA_DEPENDENT	RNA_BIOSYNTHETIC_PROCESS	TRANSCRIPTION_FROM_RNA_POLYMERASE_II_PROMOTER	RNA_METABOLIC_PROCESS	REGULATION_OF_TRANSCRIPTIONDNA_DEPENDENT	REGULATION_OF_RNA_METABOLIC_PROCESS	REGULATION_OF_TRANSCRIPTION	NUCLEOBASENUCLEOSIDENUCLEOTIDE_AND_NUCLEIC_ACID_METABOLIC_PROCESS	REGULATION_OF_TRANSCRIPTION_FROM_RNA_POLYMERASE_II_PROMOTER
DBP	D site of albumin promoter (albumin D-box) binding protein	TRANSCRIPTION	TRANSCRIPTION_DNA_DEPENDENT	RNA_BIOSYNTHETIC_PROCESS	TRANSCRIPTION_FROM_RNA_POLYMERASE_II_PROMOTER	RNA_METABOLIC_PROCESS	REGULATION_OF_TRANSCRIPTIONDNA_DEPENDENT	REGULATION_OF_RNA_METABOLIC_PROCESS	REGULATION_OF_TRANSCRIPTION	NUCLEOBASENUCLEOSIDENUCLEOTIDE_AND_NUCLEIC_ACID_METABOLIC_PROCESS	REGULATION_OF_TRANSCRIPTION_FROM_RNA_POLYMERASE_II_PROMOTER
ELF2	E74-like factor 2 (ets domain transcription factor)	TRANSCRIPTION	TRANSCRIPTION_DNA_DEPENDENT	RNA_BIOSYNTHETIC_PROCESS	TRANSCRIPTION_FROM_RNA_POLYMERASE_II_PROMOTER	RNA_METABOLIC_PROCESS	REGULATION_OF_TRANSCRIPTIONDNA_DEPENDENT	REGULATION_OF_RNA_METABOLIC_PROCESS	REGULATION_OF_TRANSCRIPTION	NUCLEOBASENUCLEOSIDENUCLEOTIDE_AND_NUCLEIC_ACID_METABOLIC_PROCESS	REGULATION_OF_TRANSCRIPTION_FROM_RNA_POLYMERASE_II_PROMOTER
JUNB	jun B proto-oncogene	TRANSCRIPTION	TRANSCRIPTION_DNA_DEPENDENT	RNA_BIOSYNTHETIC_PROCESS	TRANSCRIPTION_FROM_RNA_POLYMERASE_II_PROMOTER	RNA_METABOLIC_PROCESS	REGULATION_OF_TRANSCRIPTIONDNA_DEPENDENT	REGULATION_OF_RNA_METABOLIC_PROCESS	REGULATION_OF_TRANSCRIPTION	NUCLEOBASENUCLEOSIDENUCLEOTIDE_AND_NUCLEIC_ACID_METABOLIC_PROCESS	REGULATION_OF_TRANSCRIPTION_FROM_RNA_POLYMERASE_II_PROMOTER
JUND	jun D proto-oncogene	TRANSCRIPTION	TRANSCRIPTION_DNA_DEPENDENT	RNA_BIOSYNTHETIC_PROCESS	TRANSCRIPTION_FROM_RNA_POLYMERASE_II_PROMOTER	RNA_METABOLIC_PROCESS	REGULATION_OF_TRANSCRIPTIONDNA_DEPENDENT	REGULATION_OF_RNA_METABOLIC_PROCESS	REGULATION_OF_TRANSCRIPTION	NUCLEOBASENUCLEOSIDENUCLEOTIDE_AND_NUCLEIC_ACID_METABOLIC_PROCESS	REGULATION_OF_TRANSCRIPTION_FROM_RNA_POLYMERASE_II_PROMOTER
KLF9	Kruppel-like factor 9	TRANSCRIPTION	TRANSCRIPTION_DNA_DEPENDENT	RNA_BIOSYNTHETIC_PROCESS	TRANSCRIPTION_FROM_RNA_POLYMERASE_II_PROMOTER	RNA_METABOLIC_PROCESS	REGULATION_OF_TRANSCRIPTIONDNA_DEPENDENT	REGULATION_OF_RNA_METABOLIC_PROCESS	REGULATION_OF_TRANSCRIPTION	NUCLEOBASENUCLEOSIDENUCLEOTIDE_AND_NUCLEIC_ACID_METABOLIC_PROCESS	REGULATION_OF_TRANSCRIPTION_FROM_RNA_POLYMERASE_II_PROMOTER
RNF4	ring finger protein 4	TRANSCRIPTION	TRANSCRIPTION_DNA_DEPENDENT	RNA_BIOSYNTHETIC_PROCESS	TRANSCRIPTION_FROM_RNA_POLYMERASE_II_PROMOTER	RNA_METABOLIC_PROCESS	REGULATION_OF_TRANSCRIPTIONDNA_DEPENDENT	REGULATION_OF_RNA_METABOLIC_PROCESS	REGULATION_OF_TRANSCRIPTION	NUCLEOBASENUCLEOSIDENUCLEOTIDE_AND_NUCLEIC_ACID_METABOLIC_PROCESS	REGULATION_OF_TRANSCRIPTION_FROM_RNA_POLYMERASE_II_PROMOTER
SAP18	Sin3A-associated protein, 18kDa	TRANSCRIPTION	TRANSCRIPTION_DNA_DEPENDENT	RNA_BIOSYNTHETIC_PROCESS	TRANSCRIPTION_FROM_RNA_POLYMERASE_II_PROMOTER	RNA_METABOLIC_PROCESS	REGULATION_OF_TRANSCRIPTIONDNA_DEPENDENT	REGULATION_OF_RNA_METABOLIC_PROCESS	REGULATION_OF_TRANSCRIPTION	NUCLEOBASENUCLEOSIDENUCLEOTIDE_AND_NUCLEIC_ACID_METABOLIC_PROCESS	REGULATION_OF_TRANSCRIPTION_FROM_RNA_POLYMERASE_II_PROMOTER
SMARCA2	SWI/SNF related, matrix associated, actin dependent regulator of chromatin, subfamily a, member 2	TRANSCRIPTION	TRANSCRIPTION_DNA_DEPENDENT	RNA_BIOSYNTHETIC_PROCESS	TRANSCRIPTION_FROM_RNA_POLYMERASE_II_PROMOTER	RNA_METABOLIC_PROCESS	REGULATION_OF_TRANSCRIPTIONDNA_DEPENDENT	REGULATION_OF_RNA_METABOLIC_PROCESS	REGULATION_OF_TRANSCRIPTION	NUCLEOBASENUCLEOSIDENUCLEOTIDE_AND_NUCLEIC_ACID_METABOLIC_PROCESS	REGULATION_OF_TRANSCRIPTION_FROM_RNA_POLYMERASE_II_PROMOTER
SMARCD2	SWI/SNF related, matrix associated, actin dependent regulator of chromatin, subfamily d, member 2	TRANSCRIPTION	TRANSCRIPTION_DNA_DEPENDENT	RNA_BIOSYNTHETIC_PROCESS	TRANSCRIPTION_FROM_RNA_POLYMERASE_II_PROMOTER	RNA_METABOLIC_PROCESS	REGULATION_OF_TRANSCRIPTIONDNA_DEPENDENT	REGULATION_OF_RNA_METABOLIC_PROCESS	REGULATION_OF_TRANSCRIPTION	NUCLEOBASENUCLEOSIDENUCLEOTIDE_AND_NUCLEIC_ACID_METABOLIC_PROCESS	REGULATION_OF_TRANSCRIPTION_FROM_RNA_POLYMERASE_II_PROMOTER
SOX18	SRY (sex determining region Y)-box 18	TRANSCRIPTION	TRANSCRIPTION_DNA_DEPENDENT	RNA_BIOSYNTHETIC_PROCESS	TRANSCRIPTION_FROM_RNA_POLYMERASE_II_PROMOTER	RNA_METABOLIC_PROCESS	REGULATION_OF_TRANSCRIPTIONDNA_DEPENDENT	REGULATION_OF_RNA_METABOLIC_PROCESS	REGULATION_OF_TRANSCRIPTION	NUCLEOBASENUCLEOSIDENUCLEOTIDE_AND_NUCLEIC_ACID_METABOLIC_PROCESS	REGULATION_OF_TRANSCRIPTION_FROM_RNA_POLYMERASE_II_PROMOTER
SP4	Sp4 transcription factor	TRANSCRIPTION	TRANSCRIPTION_DNA_DEPENDENT	RNA_BIOSYNTHETIC_PROCESS	TRANSCRIPTION_FROM_RNA_POLYMERASE_II_PROMOTER	RNA_METABOLIC_PROCESS	REGULATION_OF_TRANSCRIPTIONDNA_DEPENDENT	REGULATION_OF_RNA_METABOLIC_PROCESS	REGULATION_OF_TRANSCRIPTION	NUCLEOBASENUCLEOSIDENUCLEOTIDE_AND_NUCLEIC_ACID_METABOLIC_PROCESS	REGULATION_OF_TRANSCRIPTION_FROM_RNA_POLYMERASE_II_PROMOTER
SRCAP	-	TRANSCRIPTION	TRANSCRIPTION_DNA_DEPENDENT	RNA_BIOSYNTHETIC_PROCESS	TRANSCRIPTION_FROM_RNA_POLYMERASE_II_PROMOTER	RNA_METABOLIC_PROCESS	REGULATION_OF_TRANSCRIPTIONDNA_DEPENDENT	REGULATION_OF_RNA_METABOLIC_PROCESS	REGULATION_OF_TRANSCRIPTION	NUCLEOBASENUCLEOSIDENUCLEOTIDE_AND_NUCLEIC_ACID_METABOLIC_PROCESS	REGULATION_OF_TRANSCRIPTION_FROM_RNA_POLYMERASE_II_PROMOTER
SUB1	SUB1 homolog (S. cerevisiae)	TRANSCRIPTION	TRANSCRIPTION_DNA_DEPENDENT	RNA_BIOSYNTHETIC_PROCESS	TRANSCRIPTION_FROM_RNA_POLYMERASE_II_PROMOTER	RNA_METABOLIC_PROCESS	REGULATION_OF_TRANSCRIPTIONDNA_DEPENDENT	REGULATION_OF_RNA_METABOLIC_PROCESS	REGULATION_OF_TRANSCRIPTION	NUCLEOBASENUCLEOSIDENUCLEOTIDE_AND_NUCLEIC_ACID_METABOLIC_PROCESS	REGULATION_OF_TRANSCRIPTION_FROM_RNA_POLYMERASE_II_PROMOTER
SUPT3H	suppressor of Ty 3 homolog (S. cerevisiae)	TRANSCRIPTION	TRANSCRIPTION_DNA_DEPENDENT	RNA_BIOSYNTHETIC_PROCESS	TRANSCRIPTION_FROM_RNA_POLYMERASE_II_PROMOTER	RNA_METABOLIC_PROCESS	REGULATION_OF_TRANSCRIPTIONDNA_DEPENDENT	REGULATION_OF_RNA_METABOLIC_PROCESS	REGULATION_OF_TRANSCRIPTION	NUCLEOBASENUCLEOSIDENUCLEOTIDE_AND_NUCLEIC_ACID_METABOLIC_PROCESS	REGULATION_OF_TRANSCRIPTION_FROM_RNA_POLYMERASE_II_PROMOTER
TCEB1	transcription elongation factor B (SIII), polypeptide 1 (15kDa, elongin C)	TRANSCRIPTION	TRANSCRIPTION_DNA_DEPENDENT	RNA_BIOSYNTHETIC_PROCESS	TRANSCRIPTION_FROM_RNA_POLYMERASE_II_PROMOTER	RNA_METABOLIC_PROCESS	REGULATION_OF_TRANSCRIPTIONDNA_DEPENDENT	REGULATION_OF_RNA_METABOLIC_PROCESS	REGULATION_OF_TRANSCRIPTION	NUCLEOBASENUCLEOSIDENUCLEOTIDE_AND_NUCLEIC_ACID_METABOLIC_PROCESS	REGULATION_OF_TRANSCRIPTION_FROM_RNA_POLYMERASE_II_PROMOTER
YY1	YY1 transcription factor	TRANSCRIPTION	TRANSCRIPTION_DNA_DEPENDENT	RNA_BIOSYNTHETIC_PROCESS	TRANSCRIPTION_FROM_RNA_POLYMERASE_II_PROMOTER	RNA_METABOLIC_PROCESS	REGULATION_OF_TRANSCRIPTIONDNA_DEPENDENT	REGULATION_OF_RNA_METABOLIC_PROCESS	REGULATION_OF_TRANSCRIPTION	NUCLEOBASENUCLEOSIDENUCLEOTIDE_AND_NUCLEIC_ACID_METABOLIC_PROCESS	REGULATION_OF_TRANSCRIPTION_FROM_RNA_POLYMERASE_II_PROMOTER
ARID4A	AT rich interactive domain 4A (RBP1-like)	TRANSCRIPTION	TRANSCRIPTION_DNA_DEPENDENT	RNA_BIOSYNTHETIC_PROCESS	TRANSCRIPTION_FROM_RNA_POLYMERASE_II_PROMOTER	RNA_METABOLIC_PROCESS	REGULATION_OF_TRANSCRIPTIONDNA_DEPENDENT	REGULATION_OF_RNA_METABOLIC_PROCESS	REGULATION_OF_TRANSCRIPTION	NUCLEOBASENUCLEOSIDENUCLEOTIDE_AND_NUCLEIC_ACID_METABOLIC_PROCESS
DDIT3	DNA-damage-inducible transcript 3	TRANSCRIPTION	TRANSCRIPTION_DNA_DEPENDENT	RNA_BIOSYNTHETIC_PROCESS	TRANSCRIPTION_FROM_RNA_POLYMERASE_II_PROMOTER	RNA_METABOLIC_PROCESS	REGULATION_OF_TRANSCRIPTIONDNA_DEPENDENT	REGULATION_OF_RNA_METABOLIC_PROCESS	REGULATION_OF_TRANSCRIPTION	NUCLEOBASENUCLEOSIDENUCLEOTIDE_AND_NUCLEIC_ACID_METABOLIC_PROCESS
POLR2K	polymerase (RNA) II (DNA directed) polypeptide K, 7.0kDa	TRANSCRIPTION	TRANSCRIPTION_DNA_DEPENDENT	RNA_BIOSYNTHETIC_PROCESS	TRANSCRIPTION_FROM_RNA_POLYMERASE_II_PROMOTER	RNA_METABOLIC_PROCESS	REGULATION_OF_TRANSCRIPTIONDNA_DEPENDENT	REGULATION_OF_RNA_METABOLIC_PROCESS	REGULATION_OF_TRANSCRIPTION	NUCLEOBASENUCLEOSIDENUCLEOTIDE_AND_NUCLEIC_ACID_METABOLIC_PROCESS
POLR2L	polymerase (RNA) II (DNA directed) polypeptide L, 7.6kDa	TRANSCRIPTION	TRANSCRIPTION_DNA_DEPENDENT	RNA_BIOSYNTHETIC_PROCESS	TRANSCRIPTION_FROM_RNA_POLYMERASE_II_PROMOTER	RNA_METABOLIC_PROCESS	REGULATION_OF_TRANSCRIPTIONDNA_DEPENDENT	REGULATION_OF_RNA_METABOLIC_PROCESS	REGULATION_OF_TRANSCRIPTION	NUCLEOBASENUCLEOSIDENUCLEOTIDE_AND_NUCLEIC_ACID_METABOLIC_PROCESS
AHR	aryl hydrocarbon receptor	TRANSCRIPTION	TRANSCRIPTION_DNA_DEPENDENT	RNA_BIOSYNTHETIC_PROCESS	TRANSCRIPTION_FROM_RNA_POLYMERASE_II_PROMOTER	RNA_METABOLIC_PROCESS	REGULATION_OF_TRANSCRIPTIONDNA_DEPENDENT	REGULATION_OF_RNA_METABOLIC_PROCESS	REGULATION_OF_TRANSCRIPTION	NUCLEOBASENUCLEOSIDENUCLEOTIDE_AND_NUCLEIC_ACID_METABOLIC_PROCESS
RREB1	ras responsive element binding protein 1	TRANSCRIPTION	TRANSCRIPTION_DNA_DEPENDENT	RNA_BIOSYNTHETIC_PROCESS	TRANSCRIPTION_FROM_RNA_POLYMERASE_II_PROMOTER	RNA_METABOLIC_PROCESS	REGULATION_OF_TRANSCRIPTIONDNA_DEPENDENT	REGULATION_OF_RNA_METABOLIC_PROCESS	REGULATION_OF_TRANSCRIPTION	NUCLEOBASENUCLEOSIDENUCLEOTIDE_AND_NUCLEIC_ACID_METABOLIC_PROCESS
NFATC1	nuclear factor of activated T-cells, cytoplasmic, calcineurin-dependent 1	TRANSCRIPTION	TRANSCRIPTION_DNA_DEPENDENT	RNA_BIOSYNTHETIC_PROCESS	TRANSCRIPTION_FROM_RNA_POLYMERASE_II_PROMOTER	RNA_METABOLIC_PROCESS	REGULATION_OF_TRANSCRIPTIONDNA_DEPENDENT	REGULATION_OF_RNA_METABOLIC_PROCESS	REGULATION_OF_TRANSCRIPTION	NUCLEOBASENUCLEOSIDENUCLEOTIDE_AND_NUCLEIC_ACID_METABOLIC_PROCESS
NFYA	nuclear transcription factor Y, alpha	TRANSCRIPTION	TRANSCRIPTION_DNA_DEPENDENT	RNA_BIOSYNTHETIC_PROCESS	TRANSCRIPTION_FROM_RNA_POLYMERASE_II_PROMOTER	RNA_METABOLIC_PROCESS	REGULATION_OF_TRANSCRIPTIONDNA_DEPENDENT	REGULATION_OF_RNA_METABOLIC_PROCESS	REGULATION_OF_TRANSCRIPTION	NUCLEOBASENUCLEOSIDENUCLEOTIDE_AND_NUCLEIC_ACID_METABOLIC_PROCESS
TMF1	TATA element modulatory factor 1	TRANSCRIPTION	TRANSCRIPTION_DNA_DEPENDENT	RNA_BIOSYNTHETIC_PROCESS	TRANSCRIPTION_FROM_RNA_POLYMERASE_II_PROMOTER	RNA_METABOLIC_PROCESS	REGULATION_OF_TRANSCRIPTIONDNA_DEPENDENT	REGULATION_OF_RNA_METABOLIC_PROCESS	REGULATION_OF_TRANSCRIPTION	NUCLEOBASENUCLEOSIDENUCLEOTIDE_AND_NUCLEIC_ACID_METABOLIC_PROCESS
HCFC1	host cell factor C1 (VP16-accessory protein)	TRANSCRIPTION	TRANSCRIPTION_DNA_DEPENDENT	RNA_BIOSYNTHETIC_PROCESS	TRANSCRIPTION_FROM_RNA_POLYMERASE_II_PROMOTER	RNA_METABOLIC_PROCESS			REGULATION_OF_TRANSCRIPTION	NUCLEOBASENUCLEOSIDENUCLEOTIDE_AND_NUCLEIC_ACID_METABOLIC_PROCESS
PPARA	peroxisome proliferative activated receptor, alpha	TRANSCRIPTION	TRANSCRIPTION_DNA_DEPENDENT	RNA_BIOSYNTHETIC_PROCESS	TRANSCRIPTION_FROM_RNA_POLYMERASE_II_PROMOTER	RNA_METABOLIC_PROCESS				NUCLEOBASENUCLEOSIDENUCLEOTIDE_AND_NUCLEIC_ACID_METABOLIC_PROCESS
APEX1	APEX nuclease (multifunctional DNA repair enzyme) 1	TRANSCRIPTION	TRANSCRIPTION_DNA_DEPENDENT	RNA_BIOSYNTHETIC_PROCESS	TRANSCRIPTION_FROM_RNA_POLYMERASE_II_PROMOTER	RNA_METABOLIC_PROCESS				NUCLEOBASENUCLEOSIDENUCLEOTIDE_AND_NUCLEIC_ACID_METABOLIC_PROCESS
SUPT16H	suppressor of Ty 16 homolog (S. cerevisiae)	TRANSCRIPTION	TRANSCRIPTION_DNA_DEPENDENT	RNA_BIOSYNTHETIC_PROCESS	TRANSCRIPTION_FROM_RNA_POLYMERASE_II_PROMOTER	RNA_METABOLIC_PROCESS				NUCLEOBASENUCLEOSIDENUCLEOTIDE_AND_NUCLEIC_ACID_METABOLIC_PROCESS
CCNT1	cyclin T1	TRANSCRIPTION	TRANSCRIPTION_DNA_DEPENDENT	RNA_BIOSYNTHETIC_PROCESS	TRANSCRIPTION_FROM_RNA_POLYMERASE_II_PROMOTER	RNA_METABOLIC_PROCESS				NUCLEOBASENUCLEOSIDENUCLEOTIDE_AND_NUCLEIC_ACID_METABOLIC_PROCESS
CCNT2	cyclin T2	TRANSCRIPTION	TRANSCRIPTION_DNA_DEPENDENT	RNA_BIOSYNTHETIC_PROCESS	TRANSCRIPTION_FROM_RNA_POLYMERASE_II_PROMOTER	RNA_METABOLIC_PROCESS				NUCLEOBASENUCLEOSIDENUCLEOTIDE_AND_NUCLEIC_ACID_METABOLIC_PROCESS
PSMC5	proteasome (prosome, macropain) 26S subunit, ATPase, 5	TRANSCRIPTION	TRANSCRIPTION_DNA_DEPENDENT	RNA_BIOSYNTHETIC_PROCESS	TRANSCRIPTION_FROM_RNA_POLYMERASE_II_PROMOTER	RNA_METABOLIC_PROCESS				NUCLEOBASENUCLEOSIDENUCLEOTIDE_AND_NUCLEIC_ACID_METABOLIC_PROCESS
GTF2F2	general transcription factor IIF, polypeptide 2, 30kDa	TRANSCRIPTION	TRANSCRIPTION_DNA_DEPENDENT	RNA_BIOSYNTHETIC_PROCESS	TRANSCRIPTION_FROM_RNA_POLYMERASE_II_PROMOTER	RNA_METABOLIC_PROCESS				NUCLEOBASENUCLEOSIDENUCLEOTIDE_AND_NUCLEIC_ACID_METABOLIC_PROCESS
ADRM1	adhesion regulating molecule 1	TRANSCRIPTION	TRANSCRIPTION_DNA_DEPENDENT	RNA_BIOSYNTHETIC_PROCESS	TRANSCRIPTION_FROM_RNA_POLYMERASE_II_PROMOTER	RNA_METABOLIC_PROCESS				NUCLEOBASENUCLEOSIDENUCLEOTIDE_AND_NUCLEIC_ACID_METABOLIC_PROCESS
ELL	elongation factor RNA polymerase II	TRANSCRIPTION	TRANSCRIPTION_DNA_DEPENDENT	RNA_BIOSYNTHETIC_PROCESS	TRANSCRIPTION_FROM_RNA_POLYMERASE_II_PROMOTER	RNA_METABOLIC_PROCESS				NUCLEOBASENUCLEOSIDENUCLEOTIDE_AND_NUCLEIC_ACID_METABOLIC_PROCESS
ELL2	elongation factor, RNA polymerase II, 2	TRANSCRIPTION	TRANSCRIPTION_DNA_DEPENDENT	RNA_BIOSYNTHETIC_PROCESS	TRANSCRIPTION_FROM_RNA_POLYMERASE_II_PROMOTER	RNA_METABOLIC_PROCESS				NUCLEOBASENUCLEOSIDENUCLEOTIDE_AND_NUCLEIC_ACID_METABOLIC_PROCESS
GATA3	GATA binding protein 3	TRANSCRIPTION	TRANSCRIPTION_DNA_DEPENDENT	RNA_BIOSYNTHETIC_PROCESS	TRANSCRIPTION_FROM_RNA_POLYMERASE_II_PROMOTER	RNA_METABOLIC_PROCESS				NUCLEOBASENUCLEOSIDENUCLEOTIDE_AND_NUCLEIC_ACID_METABOLIC_PROCESS
RUNX3	runt-related transcription factor 3	TRANSCRIPTION	TRANSCRIPTION_DNA_DEPENDENT	RNA_BIOSYNTHETIC_PROCESS	TRANSCRIPTION_FROM_RNA_POLYMERASE_II_PROMOTER	RNA_METABOLIC_PROCESS				NUCLEOBASENUCLEOSIDENUCLEOTIDE_AND_NUCLEIC_ACID_METABOLIC_PROCESS
SNAPC2	small nuclear RNA activating complex, polypeptide 2, 45kDa	TRANSCRIPTION	TRANSCRIPTION_DNA_DEPENDENT	RNA_BIOSYNTHETIC_PROCESS	TRANSCRIPTION_FROM_RNA_POLYMERASE_II_PROMOTER	RNA_METABOLIC_PROCESS				NUCLEOBASENUCLEOSIDENUCLEOTIDE_AND_NUCLEIC_ACID_METABOLIC_PROCESS
SNAPC4	small nuclear RNA activating complex, polypeptide 4, 190kDa	TRANSCRIPTION	TRANSCRIPTION_DNA_DEPENDENT	RNA_BIOSYNTHETIC_PROCESS	TRANSCRIPTION_FROM_RNA_POLYMERASE_II_PROMOTER	RNA_METABOLIC_PROCESS				NUCLEOBASENUCLEOSIDENUCLEOTIDE_AND_NUCLEIC_ACID_METABOLIC_PROCESS
TRPS1	trichorhinophalangeal syndrome I	TRANSCRIPTION	TRANSCRIPTION_DNA_DEPENDENT	RNA_BIOSYNTHETIC_PROCESS	TRANSCRIPTION_FROM_RNA_POLYMERASE_II_PROMOTER	RNA_METABOLIC_PROCESS				NUCLEOBASENUCLEOSIDENUCLEOTIDE_AND_NUCLEIC_ACID_METABOLIC_PROCESS
MED4	mediator of RNA polymerase II transcription, subunit 4 homolog (S. cerevisiae)	TRANSCRIPTION	TRANSCRIPTION_DNA_DEPENDENT	RNA_BIOSYNTHETIC_PROCESS	TRANSCRIPTION_FROM_RNA_POLYMERASE_II_PROMOTER	RNA_METABOLIC_PROCESS				NUCLEOBASENUCLEOSIDENUCLEOTIDE_AND_NUCLEIC_ACID_METABOLIC_PROCESS
GTF2I	general transcription factor II, i	TRANSCRIPTION	TRANSCRIPTION_DNA_DEPENDENT	RNA_BIOSYNTHETIC_PROCESS	TRANSCRIPTION_FROM_RNA_POLYMERASE_II_PROMOTER	RNA_METABOLIC_PROCESS				NUCLEOBASENUCLEOSIDENUCLEOTIDE_AND_NUCLEIC_ACID_METABOLIC_PROCESS
E2F3	E2F transcription factor 3	TRANSCRIPTION	TRANSCRIPTION_DNA_DEPENDENT	RNA_BIOSYNTHETIC_PROCESS	TRANSCRIPTION_FROM_RNA_POLYMERASE_II_PROMOTER	RNA_METABOLIC_PROCESS				NUCLEOBASENUCLEOSIDENUCLEOTIDE_AND_NUCLEIC_ACID_METABOLIC_PROCESS
GTF2E1	general transcription factor IIE, polypeptide 1, alpha 56kDa	TRANSCRIPTION	TRANSCRIPTION_DNA_DEPENDENT	RNA_BIOSYNTHETIC_PROCESS	TRANSCRIPTION_FROM_RNA_POLYMERASE_II_PROMOTER	RNA_METABOLIC_PROCESS				NUCLEOBASENUCLEOSIDENUCLEOTIDE_AND_NUCLEIC_ACID_METABOLIC_PROCESS
GTF2E2	general transcription factor IIE, polypeptide 2, beta 34kDa	TRANSCRIPTION	TRANSCRIPTION_DNA_DEPENDENT	RNA_BIOSYNTHETIC_PROCESS	TRANSCRIPTION_FROM_RNA_POLYMERASE_II_PROMOTER	RNA_METABOLIC_PROCESS				NUCLEOBASENUCLEOSIDENUCLEOTIDE_AND_NUCLEIC_ACID_METABOLIC_PROCESS
GTF2F1	general transcription factor IIF, polypeptide 1, 74kDa	TRANSCRIPTION	TRANSCRIPTION_DNA_DEPENDENT	RNA_BIOSYNTHETIC_PROCESS	TRANSCRIPTION_FROM_RNA_POLYMERASE_II_PROMOTER	RNA_METABOLIC_PROCESS				NUCLEOBASENUCLEOSIDENUCLEOTIDE_AND_NUCLEIC_ACID_METABOLIC_PROCESS
TAF5	TAF5 RNA polymerase II, TATA box binding protein (TBP)-associated factor, 100kDa	TRANSCRIPTION	TRANSCRIPTION_DNA_DEPENDENT	RNA_BIOSYNTHETIC_PROCESS	TRANSCRIPTION_FROM_RNA_POLYMERASE_II_PROMOTER	RNA_METABOLIC_PROCESS				NUCLEOBASENUCLEOSIDENUCLEOTIDE_AND_NUCLEIC_ACID_METABOLIC_PROCESS
TBP	TATA box binding protein	TRANSCRIPTION	TRANSCRIPTION_DNA_DEPENDENT	RNA_BIOSYNTHETIC_PROCESS	TRANSCRIPTION_FROM_RNA_POLYMERASE_II_PROMOTER	RNA_METABOLIC_PROCESS				NUCLEOBASENUCLEOSIDENUCLEOTIDE_AND_NUCLEIC_ACID_METABOLIC_PROCESS
ELF3	E74-like factor 3 (ets domain transcription factor, epithelial-specific )	TRANSCRIPTION	TRANSCRIPTION_DNA_DEPENDENT	RNA_BIOSYNTHETIC_PROCESS	TRANSCRIPTION_FROM_RNA_POLYMERASE_II_PROMOTER	RNA_METABOLIC_PROCESS				NUCLEOBASENUCLEOSIDENUCLEOTIDE_AND_NUCLEIC_ACID_METABOLIC_PROCESS
NR2E3	nuclear receptor subfamily 2, group E, member 3	TRANSCRIPTION	TRANSCRIPTION_DNA_DEPENDENT	RNA_BIOSYNTHETIC_PROCESS	TRANSCRIPTION_FROM_RNA_POLYMERASE_II_PROMOTER	RNA_METABOLIC_PROCESS				NUCLEOBASENUCLEOSIDENUCLEOTIDE_AND_NUCLEIC_ACID_METABOLIC_PROCESS
MLL	myeloid/lymphoid or mixed-lineage leukemia (trithorax homolog, Drosophila)	TRANSCRIPTION	TRANSCRIPTION_DNA_DEPENDENT	RNA_BIOSYNTHETIC_PROCESS	TRANSCRIPTION_FROM_RNA_POLYMERASE_II_PROMOTER	RNA_METABOLIC_PROCESS				NUCLEOBASENUCLEOSIDENUCLEOTIDE_AND_NUCLEIC_ACID_METABOLIC_PROCESS
LMO4	LIM domain only 4	TRANSCRIPTION	TRANSCRIPTION_DNA_DEPENDENT	RNA_BIOSYNTHETIC_PROCESS	TRANSCRIPTION_FROM_RNA_POLYMERASE_II_PROMOTER	RNA_METABOLIC_PROCESS				NUCLEOBASENUCLEOSIDENUCLEOTIDE_AND_NUCLEIC_ACID_METABOLIC_PROCESS
NR5A2	nuclear receptor subfamily 5, group A, member 2	TRANSCRIPTION	TRANSCRIPTION_DNA_DEPENDENT	RNA_BIOSYNTHETIC_PROCESS	TRANSCRIPTION_FROM_RNA_POLYMERASE_II_PROMOTER	RNA_METABOLIC_PROCESS				NUCLEOBASENUCLEOSIDENUCLEOTIDE_AND_NUCLEIC_ACID_METABOLIC_PROCESS
TARDBP	TAR DNA binding protein	TRANSCRIPTION	TRANSCRIPTION_DNA_DEPENDENT	RNA_BIOSYNTHETIC_PROCESS	TRANSCRIPTION_FROM_RNA_POLYMERASE_II_PROMOTER	RNA_METABOLIC_PROCESS				NUCLEOBASENUCLEOSIDENUCLEOTIDE_AND_NUCLEIC_ACID_METABOLIC_PROCESS
POU1F1	POU domain, class 1, transcription factor 1 (Pit1, growth hormone factor 1)	TRANSCRIPTION	TRANSCRIPTION_DNA_DEPENDENT	RNA_BIOSYNTHETIC_PROCESS	TRANSCRIPTION_FROM_RNA_POLYMERASE_II_PROMOTER	RNA_METABOLIC_PROCESS				NUCLEOBASENUCLEOSIDENUCLEOTIDE_AND_NUCLEIC_ACID_METABOLIC_PROCESS
MNT	MAX binding protein	TRANSCRIPTION	TRANSCRIPTION_DNA_DEPENDENT	RNA_BIOSYNTHETIC_PROCESS	TRANSCRIPTION_FROM_RNA_POLYMERASE_II_PROMOTER	RNA_METABOLIC_PROCESS				NUCLEOBASENUCLEOSIDENUCLEOTIDE_AND_NUCLEIC_ACID_METABOLIC_PROCESS
PMF1	polyamine-modulated factor 1	TRANSCRIPTION	TRANSCRIPTION_DNA_DEPENDENT	RNA_BIOSYNTHETIC_PROCESS	TRANSCRIPTION_FROM_RNA_POLYMERASE_II_PROMOTER	RNA_METABOLIC_PROCESS				NUCLEOBASENUCLEOSIDENUCLEOTIDE_AND_NUCLEIC_ACID_METABOLIC_PROCESS
GATA2	GATA binding protein 2	TRANSCRIPTION	TRANSCRIPTION_DNA_DEPENDENT	RNA_BIOSYNTHETIC_PROCESS	TRANSCRIPTION_FROM_RNA_POLYMERASE_II_PROMOTER	RNA_METABOLIC_PROCESS				NUCLEOBASENUCLEOSIDENUCLEOTIDE_AND_NUCLEIC_ACID_METABOLIC_PROCESS
NFE2L1	nuclear factor (erythroid-derived 2)-like 1	TRANSCRIPTION	TRANSCRIPTION_DNA_DEPENDENT	RNA_BIOSYNTHETIC_PROCESS	TRANSCRIPTION_FROM_RNA_POLYMERASE_II_PROMOTER	RNA_METABOLIC_PROCESS				NUCLEOBASENUCLEOSIDENUCLEOTIDE_AND_NUCLEIC_ACID_METABOLIC_PROCESS
PAX5	paired box gene 5 (B-cell lineage specific activator)	TRANSCRIPTION	TRANSCRIPTION_DNA_DEPENDENT	RNA_BIOSYNTHETIC_PROCESS	TRANSCRIPTION_FROM_RNA_POLYMERASE_II_PROMOTER	RNA_METABOLIC_PROCESS				NUCLEOBASENUCLEOSIDENUCLEOTIDE_AND_NUCLEIC_ACID_METABOLIC_PROCESS
POU2AF1	POU domain, class 2, associating factor 1	TRANSCRIPTION	TRANSCRIPTION_DNA_DEPENDENT	RNA_BIOSYNTHETIC_PROCESS	TRANSCRIPTION_FROM_RNA_POLYMERASE_II_PROMOTER	RNA_METABOLIC_PROCESS				NUCLEOBASENUCLEOSIDENUCLEOTIDE_AND_NUCLEIC_ACID_METABOLIC_PROCESS
POU2F2	POU domain, class 2, transcription factor 2	TRANSCRIPTION	TRANSCRIPTION_DNA_DEPENDENT	RNA_BIOSYNTHETIC_PROCESS	TRANSCRIPTION_FROM_RNA_POLYMERASE_II_PROMOTER	RNA_METABOLIC_PROCESS				NUCLEOBASENUCLEOSIDENUCLEOTIDE_AND_NUCLEIC_ACID_METABOLIC_PROCESS
CEBPB	CCAAT/enhancer binding protein (C/EBP), beta	TRANSCRIPTION	TRANSCRIPTION_DNA_DEPENDENT	RNA_BIOSYNTHETIC_PROCESS	TRANSCRIPTION_FROM_RNA_POLYMERASE_II_PROMOTER	RNA_METABOLIC_PROCESS				NUCLEOBASENUCLEOSIDENUCLEOTIDE_AND_NUCLEIC_ACID_METABOLIC_PROCESS
NFATC4	nuclear factor of activated T-cells, cytoplasmic, calcineurin-dependent 4	TRANSCRIPTION	TRANSCRIPTION_DNA_DEPENDENT	RNA_BIOSYNTHETIC_PROCESS	TRANSCRIPTION_FROM_RNA_POLYMERASE_II_PROMOTER	RNA_METABOLIC_PROCESS				NUCLEOBASENUCLEOSIDENUCLEOTIDE_AND_NUCLEIC_ACID_METABOLIC_PROCESS
CEBPA	CCAAT/enhancer binding protein (C/EBP), alpha	TRANSCRIPTION	TRANSCRIPTION_DNA_DEPENDENT	RNA_BIOSYNTHETIC_PROCESS	TRANSCRIPTION_FROM_RNA_POLYMERASE_II_PROMOTER	RNA_METABOLIC_PROCESS				NUCLEOBASENUCLEOSIDENUCLEOTIDE_AND_NUCLEIC_ACID_METABOLIC_PROCESS
PTTG1	pituitary tumor-transforming 1	TRANSCRIPTION	TRANSCRIPTION_DNA_DEPENDENT	RNA_BIOSYNTHETIC_PROCESS	TRANSCRIPTION_FROM_RNA_POLYMERASE_II_PROMOTER	RNA_METABOLIC_PROCESS				NUCLEOBASENUCLEOSIDENUCLEOTIDE_AND_NUCLEIC_ACID_METABOLIC_PROCESS
COPS5	COP9 constitutive photomorphogenic homolog subunit 5 (Arabidopsis)	TRANSCRIPTION	TRANSCRIPTION_DNA_DEPENDENT	RNA_BIOSYNTHETIC_PROCESS	TRANSCRIPTION_FROM_RNA_POLYMERASE_II_PROMOTER	RNA_METABOLIC_PROCESS				NUCLEOBASENUCLEOSIDENUCLEOTIDE_AND_NUCLEIC_ACID_METABOLIC_PROCESS
NR3C1	nuclear receptor subfamily 3, group C, member 1 (glucocorticoid receptor)	TRANSCRIPTION	TRANSCRIPTION_DNA_DEPENDENT	RNA_BIOSYNTHETIC_PROCESS	TRANSCRIPTION_FROM_RNA_POLYMERASE_II_PROMOTER	RNA_METABOLIC_PROCESS				NUCLEOBASENUCLEOSIDENUCLEOTIDE_AND_NUCLEIC_ACID_METABOLIC_PROCESS
SKIL	SKI-like	TRANSCRIPTION	TRANSCRIPTION_DNA_DEPENDENT	RNA_BIOSYNTHETIC_PROCESS	TRANSCRIPTION_FROM_RNA_POLYMERASE_II_PROMOTER	RNA_METABOLIC_PROCESS				NUCLEOBASENUCLEOSIDENUCLEOTIDE_AND_NUCLEIC_ACID_METABOLIC_PROCESS
HLF	hepatic leukemia factor	TRANSCRIPTION	TRANSCRIPTION_DNA_DEPENDENT	RNA_BIOSYNTHETIC_PROCESS	TRANSCRIPTION_FROM_RNA_POLYMERASE_II_PROMOTER	RNA_METABOLIC_PROCESS				NUCLEOBASENUCLEOSIDENUCLEOTIDE_AND_NUCLEIC_ACID_METABOLIC_PROCESS
ABT1	activator of basal transcription 1	TRANSCRIPTION	TRANSCRIPTION_DNA_DEPENDENT	RNA_BIOSYNTHETIC_PROCESS	TRANSCRIPTION_FROM_RNA_POLYMERASE_II_PROMOTER	RNA_METABOLIC_PROCESS				NUCLEOBASENUCLEOSIDENUCLEOTIDE_AND_NUCLEIC_ACID_METABOLIC_PROCESS
ATOH1	atonal homolog 1 (Drosophila)	TRANSCRIPTION	TRANSCRIPTION_DNA_DEPENDENT	RNA_BIOSYNTHETIC_PROCESS	TRANSCRIPTION_FROM_RNA_POLYMERASE_II_PROMOTER	RNA_METABOLIC_PROCESS				NUCLEOBASENUCLEOSIDENUCLEOTIDE_AND_NUCLEIC_ACID_METABOLIC_PROCESS
BTF3	basic transcription factor 3	TRANSCRIPTION	TRANSCRIPTION_DNA_DEPENDENT	RNA_BIOSYNTHETIC_PROCESS	TRANSCRIPTION_FROM_RNA_POLYMERASE_II_PROMOTER	RNA_METABOLIC_PROCESS				NUCLEOBASENUCLEOSIDENUCLEOTIDE_AND_NUCLEIC_ACID_METABOLIC_PROCESS
CBFB	core-binding factor, beta subunit	TRANSCRIPTION	TRANSCRIPTION_DNA_DEPENDENT	RNA_BIOSYNTHETIC_PROCESS	TRANSCRIPTION_FROM_RNA_POLYMERASE_II_PROMOTER	RNA_METABOLIC_PROCESS				NUCLEOBASENUCLEOSIDENUCLEOTIDE_AND_NUCLEIC_ACID_METABOLIC_PROCESS
CDX2	caudal type homeobox transcription factor 2	TRANSCRIPTION	TRANSCRIPTION_DNA_DEPENDENT	RNA_BIOSYNTHETIC_PROCESS	TRANSCRIPTION_FROM_RNA_POLYMERASE_II_PROMOTER	RNA_METABOLIC_PROCESS				NUCLEOBASENUCLEOSIDENUCLEOTIDE_AND_NUCLEIC_ACID_METABOLIC_PROCESS
CEBPD	CCAAT/enhancer binding protein (C/EBP), delta	TRANSCRIPTION	TRANSCRIPTION_DNA_DEPENDENT	RNA_BIOSYNTHETIC_PROCESS	TRANSCRIPTION_FROM_RNA_POLYMERASE_II_PROMOTER	RNA_METABOLIC_PROCESS				NUCLEOBASENUCLEOSIDENUCLEOTIDE_AND_NUCLEIC_ACID_METABOLIC_PROCESS
CEBPZ	CCAAT/enhancer binding protein zeta	TRANSCRIPTION	TRANSCRIPTION_DNA_DEPENDENT	RNA_BIOSYNTHETIC_PROCESS	TRANSCRIPTION_FROM_RNA_POLYMERASE_II_PROMOTER	RNA_METABOLIC_PROCESS				NUCLEOBASENUCLEOSIDENUCLEOTIDE_AND_NUCLEIC_ACID_METABOLIC_PROCESS
COPS2	COP9 constitutive photomorphogenic homolog subunit 2 (Arabidopsis)	TRANSCRIPTION	TRANSCRIPTION_DNA_DEPENDENT	RNA_BIOSYNTHETIC_PROCESS	TRANSCRIPTION_FROM_RNA_POLYMERASE_II_PROMOTER	RNA_METABOLIC_PROCESS				NUCLEOBASENUCLEOSIDENUCLEOTIDE_AND_NUCLEIC_ACID_METABOLIC_PROCESS
GMEB2	glucocorticoid modulatory element binding protein 2	TRANSCRIPTION	TRANSCRIPTION_DNA_DEPENDENT	RNA_BIOSYNTHETIC_PROCESS	TRANSCRIPTION_FROM_RNA_POLYMERASE_II_PROMOTER	RNA_METABOLIC_PROCESS				NUCLEOBASENUCLEOSIDENUCLEOTIDE_AND_NUCLEIC_ACID_METABOLIC_PROCESS
GTF2B	general transcription factor IIB	TRANSCRIPTION	TRANSCRIPTION_DNA_DEPENDENT	RNA_BIOSYNTHETIC_PROCESS	TRANSCRIPTION_FROM_RNA_POLYMERASE_II_PROMOTER	RNA_METABOLIC_PROCESS				NUCLEOBASENUCLEOSIDENUCLEOTIDE_AND_NUCLEIC_ACID_METABOLIC_PROCESS
HSF2	heat shock transcription factor 2	TRANSCRIPTION	TRANSCRIPTION_DNA_DEPENDENT	RNA_BIOSYNTHETIC_PROCESS	TRANSCRIPTION_FROM_RNA_POLYMERASE_II_PROMOTER	RNA_METABOLIC_PROCESS				NUCLEOBASENUCLEOSIDENUCLEOTIDE_AND_NUCLEIC_ACID_METABOLIC_PROCESS
IRF1	interferon regulatory factor 1	TRANSCRIPTION	TRANSCRIPTION_DNA_DEPENDENT	RNA_BIOSYNTHETIC_PROCESS	TRANSCRIPTION_FROM_RNA_POLYMERASE_II_PROMOTER	RNA_METABOLIC_PROCESS				NUCLEOBASENUCLEOSIDENUCLEOTIDE_AND_NUCLEIC_ACID_METABOLIC_PROCESS
IRF3	interferon regulatory factor 3	TRANSCRIPTION	TRANSCRIPTION_DNA_DEPENDENT	RNA_BIOSYNTHETIC_PROCESS	TRANSCRIPTION_FROM_RNA_POLYMERASE_II_PROMOTER	RNA_METABOLIC_PROCESS				NUCLEOBASENUCLEOSIDENUCLEOTIDE_AND_NUCLEIC_ACID_METABOLIC_PROCESS
KLF13	Kruppel-like factor 13	TRANSCRIPTION	TRANSCRIPTION_DNA_DEPENDENT	RNA_BIOSYNTHETIC_PROCESS	TRANSCRIPTION_FROM_RNA_POLYMERASE_II_PROMOTER	RNA_METABOLIC_PROCESS				NUCLEOBASENUCLEOSIDENUCLEOTIDE_AND_NUCLEIC_ACID_METABOLIC_PROCESS
KLF5	Kruppel-like factor 5 (intestinal)	TRANSCRIPTION	TRANSCRIPTION_DNA_DEPENDENT	RNA_BIOSYNTHETIC_PROCESS	TRANSCRIPTION_FROM_RNA_POLYMERASE_II_PROMOTER	RNA_METABOLIC_PROCESS				NUCLEOBASENUCLEOSIDENUCLEOTIDE_AND_NUCLEIC_ACID_METABOLIC_PROCESS
MAF	v-maf musculoaponeurotic fibrosarcoma oncogene homolog (avian)	TRANSCRIPTION	TRANSCRIPTION_DNA_DEPENDENT	RNA_BIOSYNTHETIC_PROCESS	TRANSCRIPTION_FROM_RNA_POLYMERASE_II_PROMOTER	RNA_METABOLIC_PROCESS				NUCLEOBASENUCLEOSIDENUCLEOTIDE_AND_NUCLEIC_ACID_METABOLIC_PROCESS
MAX	MYC associated factor X	TRANSCRIPTION	TRANSCRIPTION_DNA_DEPENDENT	RNA_BIOSYNTHETIC_PROCESS	TRANSCRIPTION_FROM_RNA_POLYMERASE_II_PROMOTER	RNA_METABOLIC_PROCESS				NUCLEOBASENUCLEOSIDENUCLEOTIDE_AND_NUCLEIC_ACID_METABOLIC_PROCESS
MSC	musculin (activated B-cell factor-1)	TRANSCRIPTION	TRANSCRIPTION_DNA_DEPENDENT	RNA_BIOSYNTHETIC_PROCESS	TRANSCRIPTION_FROM_RNA_POLYMERASE_II_PROMOTER	RNA_METABOLIC_PROCESS				NUCLEOBASENUCLEOSIDENUCLEOTIDE_AND_NUCLEIC_ACID_METABOLIC_PROCESS
NCOR1	nuclear receptor co-repressor 1	TRANSCRIPTION	TRANSCRIPTION_DNA_DEPENDENT	RNA_BIOSYNTHETIC_PROCESS	TRANSCRIPTION_FROM_RNA_POLYMERASE_II_PROMOTER	RNA_METABOLIC_PROCESS				NUCLEOBASENUCLEOSIDENUCLEOTIDE_AND_NUCLEIC_ACID_METABOLIC_PROCESS
NFE2L2	nuclear factor (erythroid-derived 2)-like 2	TRANSCRIPTION	TRANSCRIPTION_DNA_DEPENDENT	RNA_BIOSYNTHETIC_PROCESS	TRANSCRIPTION_FROM_RNA_POLYMERASE_II_PROMOTER	RNA_METABOLIC_PROCESS				NUCLEOBASENUCLEOSIDENUCLEOTIDE_AND_NUCLEIC_ACID_METABOLIC_PROCESS
NFIC	nuclear factor I/C (CCAAT-binding transcription factor)	TRANSCRIPTION	TRANSCRIPTION_DNA_DEPENDENT	RNA_BIOSYNTHETIC_PROCESS	TRANSCRIPTION_FROM_RNA_POLYMERASE_II_PROMOTER	RNA_METABOLIC_PROCESS				NUCLEOBASENUCLEOSIDENUCLEOTIDE_AND_NUCLEIC_ACID_METABOLIC_PROCESS
NFIX	nuclear factor I/X (CCAAT-binding transcription factor)	TRANSCRIPTION	TRANSCRIPTION_DNA_DEPENDENT	RNA_BIOSYNTHETIC_PROCESS	TRANSCRIPTION_FROM_RNA_POLYMERASE_II_PROMOTER	RNA_METABOLIC_PROCESS				NUCLEOBASENUCLEOSIDENUCLEOTIDE_AND_NUCLEIC_ACID_METABOLIC_PROCESS
POLR2B	polymerase (RNA) II (DNA directed) polypeptide B, 140kDa	TRANSCRIPTION	TRANSCRIPTION_DNA_DEPENDENT	RNA_BIOSYNTHETIC_PROCESS	TRANSCRIPTION_FROM_RNA_POLYMERASE_II_PROMOTER	RNA_METABOLIC_PROCESS				NUCLEOBASENUCLEOSIDENUCLEOTIDE_AND_NUCLEIC_ACID_METABOLIC_PROCESS
POLR2C	polymerase (RNA) II (DNA directed) polypeptide C, 33kDa	TRANSCRIPTION	TRANSCRIPTION_DNA_DEPENDENT	RNA_BIOSYNTHETIC_PROCESS	TRANSCRIPTION_FROM_RNA_POLYMERASE_II_PROMOTER	RNA_METABOLIC_PROCESS				NUCLEOBASENUCLEOSIDENUCLEOTIDE_AND_NUCLEIC_ACID_METABOLIC_PROCESS
POLR2D	polymerase (RNA) II (DNA directed) polypeptide D	TRANSCRIPTION	TRANSCRIPTION_DNA_DEPENDENT	RNA_BIOSYNTHETIC_PROCESS	TRANSCRIPTION_FROM_RNA_POLYMERASE_II_PROMOTER	RNA_METABOLIC_PROCESS				NUCLEOBASENUCLEOSIDENUCLEOTIDE_AND_NUCLEIC_ACID_METABOLIC_PROCESS
POLR2F	polymerase (RNA) II (DNA directed) polypeptide F	TRANSCRIPTION	TRANSCRIPTION_DNA_DEPENDENT	RNA_BIOSYNTHETIC_PROCESS	TRANSCRIPTION_FROM_RNA_POLYMERASE_II_PROMOTER	RNA_METABOLIC_PROCESS				NUCLEOBASENUCLEOSIDENUCLEOTIDE_AND_NUCLEIC_ACID_METABOLIC_PROCESS
POLR2G	polymerase (RNA) II (DNA directed) polypeptide G	TRANSCRIPTION	TRANSCRIPTION_DNA_DEPENDENT	RNA_BIOSYNTHETIC_PROCESS	TRANSCRIPTION_FROM_RNA_POLYMERASE_II_PROMOTER	RNA_METABOLIC_PROCESS				NUCLEOBASENUCLEOSIDENUCLEOTIDE_AND_NUCLEIC_ACID_METABOLIC_PROCESS
POLR2I	polymerase (RNA) II (DNA directed) polypeptide I, 14.5kDa	TRANSCRIPTION	TRANSCRIPTION_DNA_DEPENDENT	RNA_BIOSYNTHETIC_PROCESS	TRANSCRIPTION_FROM_RNA_POLYMERASE_II_PROMOTER	RNA_METABOLIC_PROCESS				NUCLEOBASENUCLEOSIDENUCLEOTIDE_AND_NUCLEIC_ACID_METABOLIC_PROCESS
POLR2J	polymerase (RNA) II (DNA directed) polypeptide J, 13.3kDa	TRANSCRIPTION	TRANSCRIPTION_DNA_DEPENDENT	RNA_BIOSYNTHETIC_PROCESS	TRANSCRIPTION_FROM_RNA_POLYMERASE_II_PROMOTER	RNA_METABOLIC_PROCESS				NUCLEOBASENUCLEOSIDENUCLEOTIDE_AND_NUCLEIC_ACID_METABOLIC_PROCESS
TAF1A	TATA box binding protein (TBP)-associated factor, RNA polymerase I, A, 48kDa	TRANSCRIPTION	TRANSCRIPTION_DNA_DEPENDENT	RNA_BIOSYNTHETIC_PROCESS	TRANSCRIPTION_FROM_RNA_POLYMERASE_II_PROMOTER	RNA_METABOLIC_PROCESS				NUCLEOBASENUCLEOSIDENUCLEOTIDE_AND_NUCLEIC_ACID_METABOLIC_PROCESS
TAF1C	TATA box binding protein (TBP)-associated factor, RNA polymerase I, C, 110kDa	TRANSCRIPTION	TRANSCRIPTION_DNA_DEPENDENT	RNA_BIOSYNTHETIC_PROCESS	TRANSCRIPTION_FROM_RNA_POLYMERASE_II_PROMOTER	RNA_METABOLIC_PROCESS				NUCLEOBASENUCLEOSIDENUCLEOTIDE_AND_NUCLEIC_ACID_METABOLIC_PROCESS
TAF5L	TAF5-like RNA polymerase II, p300/CBP-associated factor (PCAF)-associated factor, 65kDa	TRANSCRIPTION	TRANSCRIPTION_DNA_DEPENDENT	RNA_BIOSYNTHETIC_PROCESS	TRANSCRIPTION_FROM_RNA_POLYMERASE_II_PROMOTER	RNA_METABOLIC_PROCESS				NUCLEOBASENUCLEOSIDENUCLEOTIDE_AND_NUCLEIC_ACID_METABOLIC_PROCESS
TAF9	TAF9 RNA polymerase II, TATA box binding protein (TBP)-associated factor, 32kDa	TRANSCRIPTION	TRANSCRIPTION_DNA_DEPENDENT	RNA_BIOSYNTHETIC_PROCESS	TRANSCRIPTION_FROM_RNA_POLYMERASE_II_PROMOTER	RNA_METABOLIC_PROCESS				NUCLEOBASENUCLEOSIDENUCLEOTIDE_AND_NUCLEIC_ACID_METABOLIC_PROCESS
TCERG1	transcription elongation regulator 1	TRANSCRIPTION	TRANSCRIPTION_DNA_DEPENDENT	RNA_BIOSYNTHETIC_PROCESS	TRANSCRIPTION_FROM_RNA_POLYMERASE_II_PROMOTER	RNA_METABOLIC_PROCESS				NUCLEOBASENUCLEOSIDENUCLEOTIDE_AND_NUCLEIC_ACID_METABOLIC_PROCESS
THRA	thyroid hormone receptor, alpha (erythroblastic leukemia viral (v-erb-a) oncogene homolog, avian)	TRANSCRIPTION	TRANSCRIPTION_DNA_DEPENDENT	RNA_BIOSYNTHETIC_PROCESS	TRANSCRIPTION_FROM_RNA_POLYMERASE_II_PROMOTER	RNA_METABOLIC_PROCESS				NUCLEOBASENUCLEOSIDENUCLEOTIDE_AND_NUCLEIC_ACID_METABOLIC_PROCESS
TRIM24	tripartite motif-containing 24	TRANSCRIPTION	TRANSCRIPTION_DNA_DEPENDENT	RNA_BIOSYNTHETIC_PROCESS	TRANSCRIPTION_FROM_RNA_POLYMERASE_II_PROMOTER	RNA_METABOLIC_PROCESS				NUCLEOBASENUCLEOSIDENUCLEOTIDE_AND_NUCLEIC_ACID_METABOLIC_PROCESS
TRIP4	thyroid hormone receptor interactor 4	TRANSCRIPTION	TRANSCRIPTION_DNA_DEPENDENT	RNA_BIOSYNTHETIC_PROCESS	TRANSCRIPTION_FROM_RNA_POLYMERASE_II_PROMOTER	RNA_METABOLIC_PROCESS				NUCLEOBASENUCLEOSIDENUCLEOTIDE_AND_NUCLEIC_ACID_METABOLIC_PROCESS
TSC22D1	TSC22 domain family, member 1	TRANSCRIPTION	TRANSCRIPTION_DNA_DEPENDENT	RNA_BIOSYNTHETIC_PROCESS	TRANSCRIPTION_FROM_RNA_POLYMERASE_II_PROMOTER	RNA_METABOLIC_PROCESS				NUCLEOBASENUCLEOSIDENUCLEOTIDE_AND_NUCLEIC_ACID_METABOLIC_PROCESS
USF1	upstream transcription factor 1	TRANSCRIPTION	TRANSCRIPTION_DNA_DEPENDENT	RNA_BIOSYNTHETIC_PROCESS	TRANSCRIPTION_FROM_RNA_POLYMERASE_II_PROMOTER	RNA_METABOLIC_PROCESS				NUCLEOBASENUCLEOSIDENUCLEOTIDE_AND_NUCLEIC_ACID_METABOLIC_PROCESS
HELLS	helicase, lymphoid-specific	TRANSCRIPTION	TRANSCRIPTION_DNA_DEPENDENT	RNA_BIOSYNTHETIC_PROCESS		RNA_METABOLIC_PROCESS	REGULATION_OF_TRANSCRIPTIONDNA_DEPENDENT	REGULATION_OF_RNA_METABOLIC_PROCESS	REGULATION_OF_TRANSCRIPTION	NUCLEOBASENUCLEOSIDENUCLEOTIDE_AND_NUCLEIC_ACID_METABOLIC_PROCESS
SIRT1	sirtuin (silent mating type information regulation 2 homolog) 1 (S. cerevisiae)	TRANSCRIPTION	TRANSCRIPTION_DNA_DEPENDENT	RNA_BIOSYNTHETIC_PROCESS		RNA_METABOLIC_PROCESS	REGULATION_OF_TRANSCRIPTIONDNA_DEPENDENT	REGULATION_OF_RNA_METABOLIC_PROCESS	REGULATION_OF_TRANSCRIPTION	NUCLEOBASENUCLEOSIDENUCLEOTIDE_AND_NUCLEIC_ACID_METABOLIC_PROCESS
SMAD4	SMAD, mothers against DPP homolog 4 (Drosophila)	TRANSCRIPTION	TRANSCRIPTION_DNA_DEPENDENT	RNA_BIOSYNTHETIC_PROCESS		RNA_METABOLIC_PROCESS	REGULATION_OF_TRANSCRIPTIONDNA_DEPENDENT	REGULATION_OF_RNA_METABOLIC_PROCESS	REGULATION_OF_TRANSCRIPTION	NUCLEOBASENUCLEOSIDENUCLEOTIDE_AND_NUCLEIC_ACID_METABOLIC_PROCESS
PEX14	peroxisomal biogenesis factor 14	TRANSCRIPTION	TRANSCRIPTION_DNA_DEPENDENT	RNA_BIOSYNTHETIC_PROCESS		RNA_METABOLIC_PROCESS	REGULATION_OF_TRANSCRIPTIONDNA_DEPENDENT	REGULATION_OF_RNA_METABOLIC_PROCESS	REGULATION_OF_TRANSCRIPTION	NUCLEOBASENUCLEOSIDENUCLEOTIDE_AND_NUCLEIC_ACID_METABOLIC_PROCESS
ING4	inhibitor of growth family, member 4	TRANSCRIPTION	TRANSCRIPTION_DNA_DEPENDENT	RNA_BIOSYNTHETIC_PROCESS		RNA_METABOLIC_PROCESS	REGULATION_OF_TRANSCRIPTIONDNA_DEPENDENT	REGULATION_OF_RNA_METABOLIC_PROCESS	REGULATION_OF_TRANSCRIPTION	NUCLEOBASENUCLEOSIDENUCLEOTIDE_AND_NUCLEIC_ACID_METABOLIC_PROCESS
NR0B1	nuclear receptor subfamily 0, group B, member 1	TRANSCRIPTION	TRANSCRIPTION_DNA_DEPENDENT	RNA_BIOSYNTHETIC_PROCESS		RNA_METABOLIC_PROCESS	REGULATION_OF_TRANSCRIPTIONDNA_DEPENDENT	REGULATION_OF_RNA_METABOLIC_PROCESS	REGULATION_OF_TRANSCRIPTION	NUCLEOBASENUCLEOSIDENUCLEOTIDE_AND_NUCLEIC_ACID_METABOLIC_PROCESS
LDB1	LIM domain binding 1	TRANSCRIPTION	TRANSCRIPTION_DNA_DEPENDENT	RNA_BIOSYNTHETIC_PROCESS		RNA_METABOLIC_PROCESS	REGULATION_OF_TRANSCRIPTIONDNA_DEPENDENT	REGULATION_OF_RNA_METABOLIC_PROCESS	REGULATION_OF_TRANSCRIPTION	NUCLEOBASENUCLEOSIDENUCLEOTIDE_AND_NUCLEIC_ACID_METABOLIC_PROCESS
ZBTB16	zinc finger and BTB domain containing 16	TRANSCRIPTION	TRANSCRIPTION_DNA_DEPENDENT	RNA_BIOSYNTHETIC_PROCESS		RNA_METABOLIC_PROCESS	REGULATION_OF_TRANSCRIPTIONDNA_DEPENDENT	REGULATION_OF_RNA_METABOLIC_PROCESS	REGULATION_OF_TRANSCRIPTION	NUCLEOBASENUCLEOSIDENUCLEOTIDE_AND_NUCLEIC_ACID_METABOLIC_PROCESS
KLF4	Kruppel-like factor 4 (gut)	TRANSCRIPTION	TRANSCRIPTION_DNA_DEPENDENT	RNA_BIOSYNTHETIC_PROCESS		RNA_METABOLIC_PROCESS	REGULATION_OF_TRANSCRIPTIONDNA_DEPENDENT	REGULATION_OF_RNA_METABOLIC_PROCESS	REGULATION_OF_TRANSCRIPTION	NUCLEOBASENUCLEOSIDENUCLEOTIDE_AND_NUCLEIC_ACID_METABOLIC_PROCESS
TWIST2	twist homolog 2 (Drosophila)	TRANSCRIPTION	TRANSCRIPTION_DNA_DEPENDENT	RNA_BIOSYNTHETIC_PROCESS		RNA_METABOLIC_PROCESS	REGULATION_OF_TRANSCRIPTIONDNA_DEPENDENT	REGULATION_OF_RNA_METABOLIC_PROCESS	REGULATION_OF_TRANSCRIPTION	NUCLEOBASENUCLEOSIDENUCLEOTIDE_AND_NUCLEIC_ACID_METABOLIC_PROCESS
ARID5B	AT rich interactive domain 5B (MRF1-like)	TRANSCRIPTION	TRANSCRIPTION_DNA_DEPENDENT	RNA_BIOSYNTHETIC_PROCESS		RNA_METABOLIC_PROCESS	REGULATION_OF_TRANSCRIPTIONDNA_DEPENDENT	REGULATION_OF_RNA_METABOLIC_PROCESS	REGULATION_OF_TRANSCRIPTION	NUCLEOBASENUCLEOSIDENUCLEOTIDE_AND_NUCLEIC_ACID_METABOLIC_PROCESS
BCOR	BCL6 co-repressor	TRANSCRIPTION	TRANSCRIPTION_DNA_DEPENDENT	RNA_BIOSYNTHETIC_PROCESS		RNA_METABOLIC_PROCESS	REGULATION_OF_TRANSCRIPTIONDNA_DEPENDENT	REGULATION_OF_RNA_METABOLIC_PROCESS	REGULATION_OF_TRANSCRIPTION	NUCLEOBASENUCLEOSIDENUCLEOTIDE_AND_NUCLEIC_ACID_METABOLIC_PROCESS
SIN3A	SIN3 homolog A, transcription regulator (yeast)	TRANSCRIPTION	TRANSCRIPTION_DNA_DEPENDENT	RNA_BIOSYNTHETIC_PROCESS		RNA_METABOLIC_PROCESS	REGULATION_OF_TRANSCRIPTIONDNA_DEPENDENT	REGULATION_OF_RNA_METABOLIC_PROCESS	REGULATION_OF_TRANSCRIPTION	NUCLEOBASENUCLEOSIDENUCLEOTIDE_AND_NUCLEIC_ACID_METABOLIC_PROCESS
ZNF350	zinc finger protein 350	TRANSCRIPTION	TRANSCRIPTION_DNA_DEPENDENT	RNA_BIOSYNTHETIC_PROCESS		RNA_METABOLIC_PROCESS	REGULATION_OF_TRANSCRIPTIONDNA_DEPENDENT	REGULATION_OF_RNA_METABOLIC_PROCESS	REGULATION_OF_TRANSCRIPTION	NUCLEOBASENUCLEOSIDENUCLEOTIDE_AND_NUCLEIC_ACID_METABOLIC_PROCESS
HMGA1	high mobility group AT-hook 1	TRANSCRIPTION	TRANSCRIPTION_DNA_DEPENDENT	RNA_BIOSYNTHETIC_PROCESS		RNA_METABOLIC_PROCESS	REGULATION_OF_TRANSCRIPTIONDNA_DEPENDENT	REGULATION_OF_RNA_METABOLIC_PROCESS	REGULATION_OF_TRANSCRIPTION	NUCLEOBASENUCLEOSIDENUCLEOTIDE_AND_NUCLEIC_ACID_METABOLIC_PROCESS
ARID1A	AT rich interactive domain 1A (SWI- like)	TRANSCRIPTION	TRANSCRIPTION_DNA_DEPENDENT	RNA_BIOSYNTHETIC_PROCESS		RNA_METABOLIC_PROCESS	REGULATION_OF_TRANSCRIPTIONDNA_DEPENDENT	REGULATION_OF_RNA_METABOLIC_PROCESS	REGULATION_OF_TRANSCRIPTION	NUCLEOBASENUCLEOSIDENUCLEOTIDE_AND_NUCLEIC_ACID_METABOLIC_PROCESS
TP73	tumor protein p73	TRANSCRIPTION	TRANSCRIPTION_DNA_DEPENDENT	RNA_BIOSYNTHETIC_PROCESS		RNA_METABOLIC_PROCESS	REGULATION_OF_TRANSCRIPTIONDNA_DEPENDENT	REGULATION_OF_RNA_METABOLIC_PROCESS	REGULATION_OF_TRANSCRIPTION	NUCLEOBASENUCLEOSIDENUCLEOTIDE_AND_NUCLEIC_ACID_METABOLIC_PROCESS
NOTCH4	Notch homolog 4 (Drosophila)	TRANSCRIPTION	TRANSCRIPTION_DNA_DEPENDENT	RNA_BIOSYNTHETIC_PROCESS		RNA_METABOLIC_PROCESS	REGULATION_OF_TRANSCRIPTIONDNA_DEPENDENT	REGULATION_OF_RNA_METABOLIC_PROCESS	REGULATION_OF_TRANSCRIPTION	NUCLEOBASENUCLEOSIDENUCLEOTIDE_AND_NUCLEIC_ACID_METABOLIC_PROCESS
SCAP	-	TRANSCRIPTION	TRANSCRIPTION_DNA_DEPENDENT	RNA_BIOSYNTHETIC_PROCESS		RNA_METABOLIC_PROCESS	REGULATION_OF_TRANSCRIPTIONDNA_DEPENDENT	REGULATION_OF_RNA_METABOLIC_PROCESS	REGULATION_OF_TRANSCRIPTION	NUCLEOBASENUCLEOSIDENUCLEOTIDE_AND_NUCLEIC_ACID_METABOLIC_PROCESS
RORB	RAR-related orphan receptor B	TRANSCRIPTION	TRANSCRIPTION_DNA_DEPENDENT	RNA_BIOSYNTHETIC_PROCESS		RNA_METABOLIC_PROCESS	REGULATION_OF_TRANSCRIPTIONDNA_DEPENDENT	REGULATION_OF_RNA_METABOLIC_PROCESS	REGULATION_OF_TRANSCRIPTION	NUCLEOBASENUCLEOSIDENUCLEOTIDE_AND_NUCLEIC_ACID_METABOLIC_PROCESS
SMARCA1	SWI/SNF related, matrix associated, actin dependent regulator of chromatin, subfamily a, member 1	TRANSCRIPTION	TRANSCRIPTION_DNA_DEPENDENT	RNA_BIOSYNTHETIC_PROCESS		RNA_METABOLIC_PROCESS	REGULATION_OF_TRANSCRIPTIONDNA_DEPENDENT	REGULATION_OF_RNA_METABOLIC_PROCESS	REGULATION_OF_TRANSCRIPTION	NUCLEOBASENUCLEOSIDENUCLEOTIDE_AND_NUCLEIC_ACID_METABOLIC_PROCESS
GATA4	GATA binding protein 4	TRANSCRIPTION	TRANSCRIPTION_DNA_DEPENDENT	RNA_BIOSYNTHETIC_PROCESS		RNA_METABOLIC_PROCESS	REGULATION_OF_TRANSCRIPTIONDNA_DEPENDENT	REGULATION_OF_RNA_METABOLIC_PROCESS	REGULATION_OF_TRANSCRIPTION	NUCLEOBASENUCLEOSIDENUCLEOTIDE_AND_NUCLEIC_ACID_METABOLIC_PROCESS
PAX8	paired box gene 8	TRANSCRIPTION	TRANSCRIPTION_DNA_DEPENDENT	RNA_BIOSYNTHETIC_PROCESS		RNA_METABOLIC_PROCESS	REGULATION_OF_TRANSCRIPTIONDNA_DEPENDENT	REGULATION_OF_RNA_METABOLIC_PROCESS	REGULATION_OF_TRANSCRIPTION	NUCLEOBASENUCLEOSIDENUCLEOTIDE_AND_NUCLEIC_ACID_METABOLIC_PROCESS
ESRRG	estrogen-related receptor gamma	TRANSCRIPTION	TRANSCRIPTION_DNA_DEPENDENT	RNA_BIOSYNTHETIC_PROCESS		RNA_METABOLIC_PROCESS	REGULATION_OF_TRANSCRIPTIONDNA_DEPENDENT	REGULATION_OF_RNA_METABOLIC_PROCESS	REGULATION_OF_TRANSCRIPTION	NUCLEOBASENUCLEOSIDENUCLEOTIDE_AND_NUCLEIC_ACID_METABOLIC_PROCESS
FOXF2	forkhead box F2	TRANSCRIPTION	TRANSCRIPTION_DNA_DEPENDENT	RNA_BIOSYNTHETIC_PROCESS		RNA_METABOLIC_PROCESS	REGULATION_OF_TRANSCRIPTIONDNA_DEPENDENT	REGULATION_OF_RNA_METABOLIC_PROCESS	REGULATION_OF_TRANSCRIPTION	NUCLEOBASENUCLEOSIDENUCLEOTIDE_AND_NUCLEIC_ACID_METABOLIC_PROCESS
TCF3	transcription factor 3 (E2A immunoglobulin enhancer binding factors E12/E47)	TRANSCRIPTION	TRANSCRIPTION_DNA_DEPENDENT	RNA_BIOSYNTHETIC_PROCESS		RNA_METABOLIC_PROCESS	REGULATION_OF_TRANSCRIPTIONDNA_DEPENDENT	REGULATION_OF_RNA_METABOLIC_PROCESS	REGULATION_OF_TRANSCRIPTION	NUCLEOBASENUCLEOSIDENUCLEOTIDE_AND_NUCLEIC_ACID_METABOLIC_PROCESS
TCF4	transcription factor 4	TRANSCRIPTION	TRANSCRIPTION_DNA_DEPENDENT	RNA_BIOSYNTHETIC_PROCESS		RNA_METABOLIC_PROCESS	REGULATION_OF_TRANSCRIPTIONDNA_DEPENDENT	REGULATION_OF_RNA_METABOLIC_PROCESS	REGULATION_OF_TRANSCRIPTION	NUCLEOBASENUCLEOSIDENUCLEOTIDE_AND_NUCLEIC_ACID_METABOLIC_PROCESS
TRERF1	transcriptional regulating factor 1	TRANSCRIPTION	TRANSCRIPTION_DNA_DEPENDENT	RNA_BIOSYNTHETIC_PROCESS		RNA_METABOLIC_PROCESS	REGULATION_OF_TRANSCRIPTIONDNA_DEPENDENT	REGULATION_OF_RNA_METABOLIC_PROCESS	REGULATION_OF_TRANSCRIPTION	NUCLEOBASENUCLEOSIDENUCLEOTIDE_AND_NUCLEIC_ACID_METABOLIC_PROCESS
CREBBP	CREB binding protein (Rubinstein-Taybi syndrome)	TRANSCRIPTION	TRANSCRIPTION_DNA_DEPENDENT	RNA_BIOSYNTHETIC_PROCESS		RNA_METABOLIC_PROCESS	REGULATION_OF_TRANSCRIPTIONDNA_DEPENDENT	REGULATION_OF_RNA_METABOLIC_PROCESS	REGULATION_OF_TRANSCRIPTION	NUCLEOBASENUCLEOSIDENUCLEOTIDE_AND_NUCLEIC_ACID_METABOLIC_PROCESS
NFATC2	nuclear factor of activated T-cells, cytoplasmic, calcineurin-dependent 2	TRANSCRIPTION	TRANSCRIPTION_DNA_DEPENDENT	RNA_BIOSYNTHETIC_PROCESS		RNA_METABOLIC_PROCESS	REGULATION_OF_TRANSCRIPTIONDNA_DEPENDENT	REGULATION_OF_RNA_METABOLIC_PROCESS	REGULATION_OF_TRANSCRIPTION	NUCLEOBASENUCLEOSIDENUCLEOTIDE_AND_NUCLEIC_ACID_METABOLIC_PROCESS
CARM1	coactivator-associated arginine methyltransferase 1	TRANSCRIPTION	TRANSCRIPTION_DNA_DEPENDENT	RNA_BIOSYNTHETIC_PROCESS		RNA_METABOLIC_PROCESS	REGULATION_OF_TRANSCRIPTIONDNA_DEPENDENT	REGULATION_OF_RNA_METABOLIC_PROCESS	REGULATION_OF_TRANSCRIPTION	NUCLEOBASENUCLEOSIDENUCLEOTIDE_AND_NUCLEIC_ACID_METABOLIC_PROCESS
HDAC10	histone deacetylase 10	TRANSCRIPTION	TRANSCRIPTION_DNA_DEPENDENT	RNA_BIOSYNTHETIC_PROCESS		RNA_METABOLIC_PROCESS	REGULATION_OF_TRANSCRIPTIONDNA_DEPENDENT	REGULATION_OF_RNA_METABOLIC_PROCESS	REGULATION_OF_TRANSCRIPTION	NUCLEOBASENUCLEOSIDENUCLEOTIDE_AND_NUCLEIC_ACID_METABOLIC_PROCESS
HDAC4	histone deacetylase 4	TRANSCRIPTION	TRANSCRIPTION_DNA_DEPENDENT	RNA_BIOSYNTHETIC_PROCESS		RNA_METABOLIC_PROCESS	REGULATION_OF_TRANSCRIPTIONDNA_DEPENDENT	REGULATION_OF_RNA_METABOLIC_PROCESS	REGULATION_OF_TRANSCRIPTION	NUCLEOBASENUCLEOSIDENUCLEOTIDE_AND_NUCLEIC_ACID_METABOLIC_PROCESS
EZH2	enhancer of zeste homolog 2 (Drosophila)	TRANSCRIPTION	TRANSCRIPTION_DNA_DEPENDENT	RNA_BIOSYNTHETIC_PROCESS		RNA_METABOLIC_PROCESS	REGULATION_OF_TRANSCRIPTIONDNA_DEPENDENT	REGULATION_OF_RNA_METABOLIC_PROCESS	REGULATION_OF_TRANSCRIPTION	NUCLEOBASENUCLEOSIDENUCLEOTIDE_AND_NUCLEIC_ACID_METABOLIC_PROCESS
UBE2V1	ubiquitin-conjugating enzyme E2 variant 1	TRANSCRIPTION	TRANSCRIPTION_DNA_DEPENDENT	RNA_BIOSYNTHETIC_PROCESS		RNA_METABOLIC_PROCESS	REGULATION_OF_TRANSCRIPTIONDNA_DEPENDENT	REGULATION_OF_RNA_METABOLIC_PROCESS	REGULATION_OF_TRANSCRIPTION	NUCLEOBASENUCLEOSIDENUCLEOTIDE_AND_NUCLEIC_ACID_METABOLIC_PROCESS
ATRX	alpha thalassemia/mental retardation syndrome X-linked (RAD54 homolog, S. cerevisiae)	TRANSCRIPTION	TRANSCRIPTION_DNA_DEPENDENT	RNA_BIOSYNTHETIC_PROCESS		RNA_METABOLIC_PROCESS	REGULATION_OF_TRANSCRIPTIONDNA_DEPENDENT	REGULATION_OF_RNA_METABOLIC_PROCESS	REGULATION_OF_TRANSCRIPTION	NUCLEOBASENUCLEOSIDENUCLEOTIDE_AND_NUCLEIC_ACID_METABOLIC_PROCESS
EDF1	endothelial differentiation-related factor 1	TRANSCRIPTION	TRANSCRIPTION_DNA_DEPENDENT	RNA_BIOSYNTHETIC_PROCESS		RNA_METABOLIC_PROCESS	REGULATION_OF_TRANSCRIPTIONDNA_DEPENDENT	REGULATION_OF_RNA_METABOLIC_PROCESS	REGULATION_OF_TRANSCRIPTION	NUCLEOBASENUCLEOSIDENUCLEOTIDE_AND_NUCLEIC_ACID_METABOLIC_PROCESS
TFAM	transcription factor A, mitochondrial	TRANSCRIPTION	TRANSCRIPTION_DNA_DEPENDENT	RNA_BIOSYNTHETIC_PROCESS		RNA_METABOLIC_PROCESS	REGULATION_OF_TRANSCRIPTIONDNA_DEPENDENT	REGULATION_OF_RNA_METABOLIC_PROCESS	REGULATION_OF_TRANSCRIPTION	NUCLEOBASENUCLEOSIDENUCLEOTIDE_AND_NUCLEIC_ACID_METABOLIC_PROCESS
MYST2	MYST histone acetyltransferase 2	TRANSCRIPTION	TRANSCRIPTION_DNA_DEPENDENT	RNA_BIOSYNTHETIC_PROCESS		RNA_METABOLIC_PROCESS	REGULATION_OF_TRANSCRIPTIONDNA_DEPENDENT	REGULATION_OF_RNA_METABOLIC_PROCESS	REGULATION_OF_TRANSCRIPTION	NUCLEOBASENUCLEOSIDENUCLEOTIDE_AND_NUCLEIC_ACID_METABOLIC_PROCESS
PITX2	paired-like homeodomain transcription factor 2	TRANSCRIPTION	TRANSCRIPTION_DNA_DEPENDENT	RNA_BIOSYNTHETIC_PROCESS		RNA_METABOLIC_PROCESS	REGULATION_OF_TRANSCRIPTIONDNA_DEPENDENT	REGULATION_OF_RNA_METABOLIC_PROCESS	REGULATION_OF_TRANSCRIPTION	NUCLEOBASENUCLEOSIDENUCLEOTIDE_AND_NUCLEIC_ACID_METABOLIC_PROCESS
POLR3C	polymerase (RNA) III (DNA directed) polypeptide C (62kD)	TRANSCRIPTION	TRANSCRIPTION_DNA_DEPENDENT	RNA_BIOSYNTHETIC_PROCESS		RNA_METABOLIC_PROCESS	REGULATION_OF_TRANSCRIPTIONDNA_DEPENDENT	REGULATION_OF_RNA_METABOLIC_PROCESS	REGULATION_OF_TRANSCRIPTION	NUCLEOBASENUCLEOSIDENUCLEOTIDE_AND_NUCLEIC_ACID_METABOLIC_PROCESS
ESR2	estrogen receptor 2 (ER beta)	TRANSCRIPTION	TRANSCRIPTION_DNA_DEPENDENT	RNA_BIOSYNTHETIC_PROCESS		RNA_METABOLIC_PROCESS	REGULATION_OF_TRANSCRIPTIONDNA_DEPENDENT	REGULATION_OF_RNA_METABOLIC_PROCESS	REGULATION_OF_TRANSCRIPTION	NUCLEOBASENUCLEOSIDENUCLEOTIDE_AND_NUCLEIC_ACID_METABOLIC_PROCESS
CALR	calreticulin	TRANSCRIPTION	TRANSCRIPTION_DNA_DEPENDENT	RNA_BIOSYNTHETIC_PROCESS		RNA_METABOLIC_PROCESS	REGULATION_OF_TRANSCRIPTIONDNA_DEPENDENT	REGULATION_OF_RNA_METABOLIC_PROCESS	REGULATION_OF_TRANSCRIPTION	NUCLEOBASENUCLEOSIDENUCLEOTIDE_AND_NUCLEIC_ACID_METABOLIC_PROCESS
GATA6	GATA binding protein 6	TRANSCRIPTION	TRANSCRIPTION_DNA_DEPENDENT	RNA_BIOSYNTHETIC_PROCESS		RNA_METABOLIC_PROCESS	REGULATION_OF_TRANSCRIPTIONDNA_DEPENDENT	REGULATION_OF_RNA_METABOLIC_PROCESS	REGULATION_OF_TRANSCRIPTION	NUCLEOBASENUCLEOSIDENUCLEOTIDE_AND_NUCLEIC_ACID_METABOLIC_PROCESS
CRABP2	cellular retinoic acid binding protein 2	TRANSCRIPTION	TRANSCRIPTION_DNA_DEPENDENT	RNA_BIOSYNTHETIC_PROCESS		RNA_METABOLIC_PROCESS	REGULATION_OF_TRANSCRIPTIONDNA_DEPENDENT	REGULATION_OF_RNA_METABOLIC_PROCESS	REGULATION_OF_TRANSCRIPTION	NUCLEOBASENUCLEOSIDENUCLEOTIDE_AND_NUCLEIC_ACID_METABOLIC_PROCESS
CTNNBIP1	catenin, beta interacting protein 1	TRANSCRIPTION	TRANSCRIPTION_DNA_DEPENDENT	RNA_BIOSYNTHETIC_PROCESS		RNA_METABOLIC_PROCESS	REGULATION_OF_TRANSCRIPTIONDNA_DEPENDENT	REGULATION_OF_RNA_METABOLIC_PROCESS	REGULATION_OF_TRANSCRIPTION	NUCLEOBASENUCLEOSIDENUCLEOTIDE_AND_NUCLEIC_ACID_METABOLIC_PROCESS
GCM1	glial cells missing homolog 1 (Drosophila)	TRANSCRIPTION	TRANSCRIPTION_DNA_DEPENDENT	RNA_BIOSYNTHETIC_PROCESS		RNA_METABOLIC_PROCESS	REGULATION_OF_TRANSCRIPTIONDNA_DEPENDENT	REGULATION_OF_RNA_METABOLIC_PROCESS	REGULATION_OF_TRANSCRIPTION	NUCLEOBASENUCLEOSIDENUCLEOTIDE_AND_NUCLEIC_ACID_METABOLIC_PROCESS
POU5F1	POU domain, class 5, transcription factor 1	TRANSCRIPTION	TRANSCRIPTION_DNA_DEPENDENT	RNA_BIOSYNTHETIC_PROCESS		RNA_METABOLIC_PROCESS	REGULATION_OF_TRANSCRIPTIONDNA_DEPENDENT	REGULATION_OF_RNA_METABOLIC_PROCESS	REGULATION_OF_TRANSCRIPTION	NUCLEOBASENUCLEOSIDENUCLEOTIDE_AND_NUCLEIC_ACID_METABOLIC_PROCESS
NR2C2	nuclear receptor subfamily 2, group C, member 2	TRANSCRIPTION	TRANSCRIPTION_DNA_DEPENDENT	RNA_BIOSYNTHETIC_PROCESS		RNA_METABOLIC_PROCESS	REGULATION_OF_TRANSCRIPTIONDNA_DEPENDENT	REGULATION_OF_RNA_METABOLIC_PROCESS	REGULATION_OF_TRANSCRIPTION	NUCLEOBASENUCLEOSIDENUCLEOTIDE_AND_NUCLEIC_ACID_METABOLIC_PROCESS
RARB	retinoic acid receptor, beta	TRANSCRIPTION	TRANSCRIPTION_DNA_DEPENDENT	RNA_BIOSYNTHETIC_PROCESS		RNA_METABOLIC_PROCESS	REGULATION_OF_TRANSCRIPTIONDNA_DEPENDENT	REGULATION_OF_RNA_METABOLIC_PROCESS	REGULATION_OF_TRANSCRIPTION	NUCLEOBASENUCLEOSIDENUCLEOTIDE_AND_NUCLEIC_ACID_METABOLIC_PROCESS
ZNF74	zinc finger protein 74	TRANSCRIPTION	TRANSCRIPTION_DNA_DEPENDENT	RNA_BIOSYNTHETIC_PROCESS		RNA_METABOLIC_PROCESS	REGULATION_OF_TRANSCRIPTIONDNA_DEPENDENT	REGULATION_OF_RNA_METABOLIC_PROCESS	REGULATION_OF_TRANSCRIPTION	NUCLEOBASENUCLEOSIDENUCLEOTIDE_AND_NUCLEIC_ACID_METABOLIC_PROCESS
ATF7	activating transcription factor 7	TRANSCRIPTION	TRANSCRIPTION_DNA_DEPENDENT	RNA_BIOSYNTHETIC_PROCESS		RNA_METABOLIC_PROCESS	REGULATION_OF_TRANSCRIPTIONDNA_DEPENDENT	REGULATION_OF_RNA_METABOLIC_PROCESS	REGULATION_OF_TRANSCRIPTION	NUCLEOBASENUCLEOSIDENUCLEOTIDE_AND_NUCLEIC_ACID_METABOLIC_PROCESS
HIC1	hypermethylated in cancer 1	TRANSCRIPTION	TRANSCRIPTION_DNA_DEPENDENT	RNA_BIOSYNTHETIC_PROCESS		RNA_METABOLIC_PROCESS	REGULATION_OF_TRANSCRIPTIONDNA_DEPENDENT	REGULATION_OF_RNA_METABOLIC_PROCESS	REGULATION_OF_TRANSCRIPTION	NUCLEOBASENUCLEOSIDENUCLEOTIDE_AND_NUCLEIC_ACID_METABOLIC_PROCESS
HSF4	heat shock transcription factor 4	TRANSCRIPTION	TRANSCRIPTION_DNA_DEPENDENT	RNA_BIOSYNTHETIC_PROCESS		RNA_METABOLIC_PROCESS	REGULATION_OF_TRANSCRIPTIONDNA_DEPENDENT	REGULATION_OF_RNA_METABOLIC_PROCESS	REGULATION_OF_TRANSCRIPTION	NUCLEOBASENUCLEOSIDENUCLEOTIDE_AND_NUCLEIC_ACID_METABOLIC_PROCESS
JMJD1C	jumonji domain containing 1C	TRANSCRIPTION	TRANSCRIPTION_DNA_DEPENDENT	RNA_BIOSYNTHETIC_PROCESS		RNA_METABOLIC_PROCESS	REGULATION_OF_TRANSCRIPTIONDNA_DEPENDENT	REGULATION_OF_RNA_METABOLIC_PROCESS	REGULATION_OF_TRANSCRIPTION	NUCLEOBASENUCLEOSIDENUCLEOTIDE_AND_NUCLEIC_ACID_METABOLIC_PROCESS
NFYB	nuclear transcription factor Y, beta	TRANSCRIPTION	TRANSCRIPTION_DNA_DEPENDENT	RNA_BIOSYNTHETIC_PROCESS		RNA_METABOLIC_PROCESS	REGULATION_OF_TRANSCRIPTIONDNA_DEPENDENT	REGULATION_OF_RNA_METABOLIC_PROCESS	REGULATION_OF_TRANSCRIPTION	NUCLEOBASENUCLEOSIDENUCLEOTIDE_AND_NUCLEIC_ACID_METABOLIC_PROCESS
NR1D2	nuclear receptor subfamily 1, group D, member 2	TRANSCRIPTION	TRANSCRIPTION_DNA_DEPENDENT	RNA_BIOSYNTHETIC_PROCESS		RNA_METABOLIC_PROCESS	REGULATION_OF_TRANSCRIPTIONDNA_DEPENDENT	REGULATION_OF_RNA_METABOLIC_PROCESS	REGULATION_OF_TRANSCRIPTION	NUCLEOBASENUCLEOSIDENUCLEOTIDE_AND_NUCLEIC_ACID_METABOLIC_PROCESS
PQBP1	polyglutamine binding protein 1	TRANSCRIPTION	TRANSCRIPTION_DNA_DEPENDENT	RNA_BIOSYNTHETIC_PROCESS		RNA_METABOLIC_PROCESS	REGULATION_OF_TRANSCRIPTIONDNA_DEPENDENT	REGULATION_OF_RNA_METABOLIC_PROCESS	REGULATION_OF_TRANSCRIPTION	NUCLEOBASENUCLEOSIDENUCLEOTIDE_AND_NUCLEIC_ACID_METABOLIC_PROCESS
RBAK	RB-associated KRAB zinc finger	TRANSCRIPTION	TRANSCRIPTION_DNA_DEPENDENT	RNA_BIOSYNTHETIC_PROCESS		RNA_METABOLIC_PROCESS	REGULATION_OF_TRANSCRIPTIONDNA_DEPENDENT	REGULATION_OF_RNA_METABOLIC_PROCESS	REGULATION_OF_TRANSCRIPTION	NUCLEOBASENUCLEOSIDENUCLEOTIDE_AND_NUCLEIC_ACID_METABOLIC_PROCESS
REST	RE1-silencing transcription factor	TRANSCRIPTION	TRANSCRIPTION_DNA_DEPENDENT	RNA_BIOSYNTHETIC_PROCESS		RNA_METABOLIC_PROCESS	REGULATION_OF_TRANSCRIPTIONDNA_DEPENDENT	REGULATION_OF_RNA_METABOLIC_PROCESS	REGULATION_OF_TRANSCRIPTION	NUCLEOBASENUCLEOSIDENUCLEOTIDE_AND_NUCLEIC_ACID_METABOLIC_PROCESS
SP100	SP100 nuclear antigen	TRANSCRIPTION	TRANSCRIPTION_DNA_DEPENDENT	RNA_BIOSYNTHETIC_PROCESS		RNA_METABOLIC_PROCESS	REGULATION_OF_TRANSCRIPTIONDNA_DEPENDENT	REGULATION_OF_RNA_METABOLIC_PROCESS	REGULATION_OF_TRANSCRIPTION	NUCLEOBASENUCLEOSIDENUCLEOTIDE_AND_NUCLEIC_ACID_METABOLIC_PROCESS
SP3	Sp3 transcription factor	TRANSCRIPTION	TRANSCRIPTION_DNA_DEPENDENT	RNA_BIOSYNTHETIC_PROCESS		RNA_METABOLIC_PROCESS	REGULATION_OF_TRANSCRIPTIONDNA_DEPENDENT	REGULATION_OF_RNA_METABOLIC_PROCESS	REGULATION_OF_TRANSCRIPTION	NUCLEOBASENUCLEOSIDENUCLEOTIDE_AND_NUCLEIC_ACID_METABOLIC_PROCESS
UBTF	upstream binding transcription factor, RNA polymerase I	TRANSCRIPTION	TRANSCRIPTION_DNA_DEPENDENT	RNA_BIOSYNTHETIC_PROCESS		RNA_METABOLIC_PROCESS	REGULATION_OF_TRANSCRIPTIONDNA_DEPENDENT	REGULATION_OF_RNA_METABOLIC_PROCESS	REGULATION_OF_TRANSCRIPTION	NUCLEOBASENUCLEOSIDENUCLEOTIDE_AND_NUCLEIC_ACID_METABOLIC_PROCESS
ZNHIT3	zinc finger, HIT type 3	TRANSCRIPTION	TRANSCRIPTION_DNA_DEPENDENT	RNA_BIOSYNTHETIC_PROCESS		RNA_METABOLIC_PROCESS	REGULATION_OF_TRANSCRIPTIONDNA_DEPENDENT	REGULATION_OF_RNA_METABOLIC_PROCESS	REGULATION_OF_TRANSCRIPTION	NUCLEOBASENUCLEOSIDENUCLEOTIDE_AND_NUCLEIC_ACID_METABOLIC_PROCESS
ERCC6	excision repair cross-complementing rodent repair deficiency, complementation group 6	TRANSCRIPTION	TRANSCRIPTION_DNA_DEPENDENT	RNA_BIOSYNTHETIC_PROCESS		RNA_METABOLIC_PROCESS		REGULATION_OF_RNA_METABOLIC_PROCESS		NUCLEOBASENUCLEOSIDENUCLEOTIDE_AND_NUCLEIC_ACID_METABOLIC_PROCESS
BRF1	BRF1 homolog, subunit of RNA polymerase III transcription initiation factor IIIB (S. cerevisiae)	TRANSCRIPTION	TRANSCRIPTION_DNA_DEPENDENT	RNA_BIOSYNTHETIC_PROCESS		RNA_METABOLIC_PROCESS				NUCLEOBASENUCLEOSIDENUCLEOTIDE_AND_NUCLEIC_ACID_METABOLIC_PROCESS
GTF3C2	general transcription factor IIIC, polypeptide 2, beta 110kDa	TRANSCRIPTION	TRANSCRIPTION_DNA_DEPENDENT	RNA_BIOSYNTHETIC_PROCESS		RNA_METABOLIC_PROCESS				NUCLEOBASENUCLEOSIDENUCLEOTIDE_AND_NUCLEIC_ACID_METABOLIC_PROCESS
RRN3	RRN3 RNA polymerase I transcription factor homolog (S. cerevisiae)	TRANSCRIPTION	TRANSCRIPTION_DNA_DEPENDENT	RNA_BIOSYNTHETIC_PROCESS		RNA_METABOLIC_PROCESS				NUCLEOBASENUCLEOSIDENUCLEOTIDE_AND_NUCLEIC_ACID_METABOLIC_PROCESS
RBM9	RNA binding motif protein 9	TRANSCRIPTION				RNA_METABOLIC_PROCESS			REGULATION_OF_TRANSCRIPTION	NUCLEOBASENUCLEOSIDENUCLEOTIDE_AND_NUCLEIC_ACID_METABOLIC_PROCESS
APOBEC3G	apolipoprotein B mRNA editing enzyme, catalytic polypeptide-like 3G	TRANSCRIPTION				RNA_METABOLIC_PROCESS				NUCLEOBASENUCLEOSIDENUCLEOTIDE_AND_NUCLEIC_ACID_METABOLIC_PROCESS
RNPS1	RNA binding protein S1, serine-rich domain	TRANSCRIPTION				RNA_METABOLIC_PROCESS				NUCLEOBASENUCLEOSIDENUCLEOTIDE_AND_NUCLEIC_ACID_METABOLIC_PROCESS
MYST3	MYST histone acetyltransferase (monocytic leukemia) 3	TRANSCRIPTION							REGULATION_OF_TRANSCRIPTION	NUCLEOBASENUCLEOSIDENUCLEOTIDE_AND_NUCLEIC_ACID_METABOLIC_PROCESS
MYST1	MYST histone acetyltransferase 1	TRANSCRIPTION							REGULATION_OF_TRANSCRIPTION	NUCLEOBASENUCLEOSIDENUCLEOTIDE_AND_NUCLEIC_ACID_METABOLIC_PROCESS
MYST4	MYST histone acetyltransferase (monocytic leukemia) 4	TRANSCRIPTION							REGULATION_OF_TRANSCRIPTION	NUCLEOBASENUCLEOSIDENUCLEOTIDE_AND_NUCLEIC_ACID_METABOLIC_PROCESS
BCL3	B-cell CLL/lymphoma 3	TRANSCRIPTION							REGULATION_OF_TRANSCRIPTION	NUCLEOBASENUCLEOSIDENUCLEOTIDE_AND_NUCLEIC_ACID_METABOLIC_PROCESS
SIRT2	sirtuin (silent mating type information regulation 2 homolog) 2 (S. cerevisiae)	TRANSCRIPTION							REGULATION_OF_TRANSCRIPTION	NUCLEOBASENUCLEOSIDENUCLEOTIDE_AND_NUCLEIC_ACID_METABOLIC_PROCESS
SUMO1	SMT3 suppressor of mif two 3 homolog 1 (S. cerevisiae)	TRANSCRIPTION							REGULATION_OF_TRANSCRIPTION	NUCLEOBASENUCLEOSIDENUCLEOTIDE_AND_NUCLEIC_ACID_METABOLIC_PROCESS
PML	promyelocytic leukemia	TRANSCRIPTION							REGULATION_OF_TRANSCRIPTION	NUCLEOBASENUCLEOSIDENUCLEOTIDE_AND_NUCLEIC_ACID_METABOLIC_PROCESS
EID2	EP300 interacting inhibitor of differentiation 2	TRANSCRIPTION							REGULATION_OF_TRANSCRIPTION	NUCLEOBASENUCLEOSIDENUCLEOTIDE_AND_NUCLEIC_ACID_METABOLIC_PROCESS
ID3	inhibitor of DNA binding 3, dominant negative helix-loop-helix protein	TRANSCRIPTION							REGULATION_OF_TRANSCRIPTION	NUCLEOBASENUCLEOSIDENUCLEOTIDE_AND_NUCLEIC_ACID_METABOLIC_PROCESS
ID1	inhibitor of DNA binding 1, dominant negative helix-loop-helix protein	TRANSCRIPTION							REGULATION_OF_TRANSCRIPTION	NUCLEOBASENUCLEOSIDENUCLEOTIDE_AND_NUCLEIC_ACID_METABOLIC_PROCESS
NR1I2	nuclear receptor subfamily 1, group I, member 2	TRANSCRIPTION							REGULATION_OF_TRANSCRIPTION	NUCLEOBASENUCLEOSIDENUCLEOTIDE_AND_NUCLEIC_ACID_METABOLIC_PROCESS
ATXN1	ataxin 1	TRANSCRIPTION							REGULATION_OF_TRANSCRIPTION	NUCLEOBASENUCLEOSIDENUCLEOTIDE_AND_NUCLEIC_ACID_METABOLIC_PROCESS
RUNX2	runt-related transcription factor 2	TRANSCRIPTION							REGULATION_OF_TRANSCRIPTION	NUCLEOBASENUCLEOSIDENUCLEOTIDE_AND_NUCLEIC_ACID_METABOLIC_PROCESS
TLE1	transducin-like enhancer of split 1 (E(sp1) homolog, Drosophila)	TRANSCRIPTION							REGULATION_OF_TRANSCRIPTION	NUCLEOBASENUCLEOSIDENUCLEOTIDE_AND_NUCLEIC_ACID_METABOLIC_PROCESS
VDR	vitamin D (1,25- dihydroxyvitamin D3) receptor	TRANSCRIPTION							REGULATION_OF_TRANSCRIPTION	NUCLEOBASENUCLEOSIDENUCLEOTIDE_AND_NUCLEIC_ACID_METABOLIC_PROCESS
GRLF1	glucocorticoid receptor DNA binding factor 1	TRANSCRIPTION							REGULATION_OF_TRANSCRIPTION	NUCLEOBASENUCLEOSIDENUCLEOTIDE_AND_NUCLEIC_ACID_METABOLIC_PROCESS
NKRF	NF-kappaB repressing factor	TRANSCRIPTION							REGULATION_OF_TRANSCRIPTION	NUCLEOBASENUCLEOSIDENUCLEOTIDE_AND_NUCLEIC_ACID_METABOLIC_PROCESS
NR1H2	nuclear receptor subfamily 1, group H, member 2	TRANSCRIPTION							REGULATION_OF_TRANSCRIPTION	NUCLEOBASENUCLEOSIDENUCLEOTIDE_AND_NUCLEIC_ACID_METABOLIC_PROCESS
POU2F1	POU domain, class 2, transcription factor 1	TRANSCRIPTION							REGULATION_OF_TRANSCRIPTION	NUCLEOBASENUCLEOSIDENUCLEOTIDE_AND_NUCLEIC_ACID_METABOLIC_PROCESS
RFX3	regulatory factor X, 3 (influences HLA class II expression)	TRANSCRIPTION							REGULATION_OF_TRANSCRIPTION	NUCLEOBASENUCLEOSIDENUCLEOTIDE_AND_NUCLEIC_ACID_METABOLIC_PROCESS
SUDS3	suppressor of defective silencing 3 homolog (S. cerevisiae)	TRANSCRIPTION							REGULATION_OF_TRANSCRIPTION	NUCLEOBASENUCLEOSIDENUCLEOTIDE_AND_NUCLEIC_ACID_METABOLIC_PROCESS
ARNT2	aryl-hydrocarbon receptor nuclear translocator 2	TRANSCRIPTION							REGULATION_OF_TRANSCRIPTION	NUCLEOBASENUCLEOSIDENUCLEOTIDE_AND_NUCLEIC_ACID_METABOLIC_PROCESS
IRF4	interferon regulatory factor 4	TRANSCRIPTION							REGULATION_OF_TRANSCRIPTION	NUCLEOBASENUCLEOSIDENUCLEOTIDE_AND_NUCLEIC_ACID_METABOLIC_PROCESS
NUP62	nucleoporin 62kDa	TRANSCRIPTION							REGULATION_OF_TRANSCRIPTION	NUCLEOBASENUCLEOSIDENUCLEOTIDE_AND_NUCLEIC_ACID_METABOLIC_PROCESS
EGR1	early growth response 1	TRANSCRIPTION							REGULATION_OF_TRANSCRIPTION	NUCLEOBASENUCLEOSIDENUCLEOTIDE_AND_NUCLEIC_ACID_METABOLIC_PROCESS
UBE2N	ubiquitin-conjugating enzyme E2N (UBC13 homolog, yeast)	TRANSCRIPTION							REGULATION_OF_TRANSCRIPTION	NUCLEOBASENUCLEOSIDENUCLEOTIDE_AND_NUCLEIC_ACID_METABOLIC_PROCESS
CDKN2A	cyclin-dependent kinase inhibitor 2A (melanoma, p16, inhibits CDK4)	TRANSCRIPTION							REGULATION_OF_TRANSCRIPTION	NUCLEOBASENUCLEOSIDENUCLEOTIDE_AND_NUCLEIC_ACID_METABOLIC_PROCESS
EGLN1	egl nine homolog 1 (C. elegans)	TRANSCRIPTION							REGULATION_OF_TRANSCRIPTION	NUCLEOBASENUCLEOSIDENUCLEOTIDE_AND_NUCLEIC_ACID_METABOLIC_PROCESS
EP300	E1A binding protein p300	TRANSCRIPTION							REGULATION_OF_TRANSCRIPTION	NUCLEOBASENUCLEOSIDENUCLEOTIDE_AND_NUCLEIC_ACID_METABOLIC_PROCESS
PPP5C	protein phosphatase 5, catalytic subunit	TRANSCRIPTION								NUCLEOBASENUCLEOSIDENUCLEOTIDE_AND_NUCLEIC_ACID_METABOLIC_PROCESS
POLR2H	polymerase (RNA) II (DNA directed) polypeptide H	TRANSCRIPTION								NUCLEOBASENUCLEOSIDENUCLEOTIDE_AND_NUCLEIC_ACID_METABOLIC_PROCESS
PTMA	prothymosin, alpha (gene sequence 28)	TRANSCRIPTION								NUCLEOBASENUCLEOSIDENUCLEOTIDE_AND_NUCLEIC_ACID_METABOLIC_PROCESS
PRIM1	primase, polypeptide 1, 49kDa			RNA_BIOSYNTHETIC_PROCESS		RNA_METABOLIC_PROCESS				NUCLEOBASENUCLEOSIDENUCLEOTIDE_AND_NUCLEIC_ACID_METABOLIC_PROCESS
GSPT1	G1 to S phase transition 1					RNA_METABOLIC_PROCESS				NUCLEOBASENUCLEOSIDENUCLEOTIDE_AND_NUCLEIC_ACID_METABOLIC_PROCESS
CPSF1	cleavage and polyadenylation specific factor 1, 160kDa					RNA_METABOLIC_PROCESS				NUCLEOBASENUCLEOSIDENUCLEOTIDE_AND_NUCLEIC_ACID_METABOLIC_PROCESS
CSTF1	cleavage stimulation factor, 3' pre-RNA, subunit 1, 50kDa					RNA_METABOLIC_PROCESS				NUCLEOBASENUCLEOSIDENUCLEOTIDE_AND_NUCLEIC_ACID_METABOLIC_PROCESS
CSTF2	cleavage stimulation factor, 3' pre-RNA, subunit 2, 64kDa					RNA_METABOLIC_PROCESS				NUCLEOBASENUCLEOSIDENUCLEOTIDE_AND_NUCLEIC_ACID_METABOLIC_PROCESS
CSTF3	cleavage stimulation factor, 3' pre-RNA, subunit 3, 77kDa					RNA_METABOLIC_PROCESS				NUCLEOBASENUCLEOSIDENUCLEOTIDE_AND_NUCLEIC_ACID_METABOLIC_PROCESS
SF1	splicing factor 1					RNA_METABOLIC_PROCESS				NUCLEOBASENUCLEOSIDENUCLEOTIDE_AND_NUCLEIC_ACID_METABOLIC_PROCESS
SF3A1	splicing factor 3a, subunit 1, 120kDa					RNA_METABOLIC_PROCESS				NUCLEOBASENUCLEOSIDENUCLEOTIDE_AND_NUCLEIC_ACID_METABOLIC_PROCESS
SFRS5	splicing factor, arginine/serine-rich 5					RNA_METABOLIC_PROCESS				NUCLEOBASENUCLEOSIDENUCLEOTIDE_AND_NUCLEIC_ACID_METABOLIC_PROCESS
SFRS2IP	splicing factor, arginine/serine-rich 2, interacting protein					RNA_METABOLIC_PROCESS				NUCLEOBASENUCLEOSIDENUCLEOTIDE_AND_NUCLEIC_ACID_METABOLIC_PROCESS
SIP1	survival of motor neuron protein interacting protein 1					RNA_METABOLIC_PROCESS				NUCLEOBASENUCLEOSIDENUCLEOTIDE_AND_NUCLEIC_ACID_METABOLIC_PROCESS
GEMIN7	gem (nuclear organelle) associated protein 7					RNA_METABOLIC_PROCESS				NUCLEOBASENUCLEOSIDENUCLEOTIDE_AND_NUCLEIC_ACID_METABOLIC_PROCESS
SMNDC1	survival motor neuron domain containing 1					RNA_METABOLIC_PROCESS				NUCLEOBASENUCLEOSIDENUCLEOTIDE_AND_NUCLEIC_ACID_METABOLIC_PROCESS
KHSRP	KH-type splicing regulatory protein (FUSE binding protein 2)					RNA_METABOLIC_PROCESS				NUCLEOBASENUCLEOSIDENUCLEOTIDE_AND_NUCLEIC_ACID_METABOLIC_PROCESS
LSM1	LSM1 homolog, U6 small nuclear RNA associated (S. cerevisiae)					RNA_METABOLIC_PROCESS				NUCLEOBASENUCLEOSIDENUCLEOTIDE_AND_NUCLEIC_ACID_METABOLIC_PROCESS
SFRS2	splicing factor, arginine/serine-rich 2					RNA_METABOLIC_PROCESS				NUCLEOBASENUCLEOSIDENUCLEOTIDE_AND_NUCLEIC_ACID_METABOLIC_PROCESS
SFRS4	splicing factor, arginine/serine-rich 4					RNA_METABOLIC_PROCESS				NUCLEOBASENUCLEOSIDENUCLEOTIDE_AND_NUCLEIC_ACID_METABOLIC_PROCESS
CPSF6	cleavage and polyadenylation specific factor 6, 68kDa					RNA_METABOLIC_PROCESS				NUCLEOBASENUCLEOSIDENUCLEOTIDE_AND_NUCLEIC_ACID_METABOLIC_PROCESS
LSM3	LSM3 homolog, U6 small nuclear RNA associated (S. cerevisiae)					RNA_METABOLIC_PROCESS				NUCLEOBASENUCLEOSIDENUCLEOTIDE_AND_NUCLEIC_ACID_METABOLIC_PROCESS
LSM5	LSM5 homolog, U6 small nuclear RNA associated (S. cerevisiae)					RNA_METABOLIC_PROCESS				NUCLEOBASENUCLEOSIDENUCLEOTIDE_AND_NUCLEIC_ACID_METABOLIC_PROCESS
NUDT21	nudix (nucleoside diphosphate linked moiety X)-type motif 21					RNA_METABOLIC_PROCESS				NUCLEOBASENUCLEOSIDENUCLEOTIDE_AND_NUCLEIC_ACID_METABOLIC_PROCESS
RNGTT	RNA guanylyltransferase and 5'-phosphatase					RNA_METABOLIC_PROCESS				NUCLEOBASENUCLEOSIDENUCLEOTIDE_AND_NUCLEIC_ACID_METABOLIC_PROCESS
RNMT	RNA (guanine-7-) methyltransferase					RNA_METABOLIC_PROCESS				NUCLEOBASENUCLEOSIDENUCLEOTIDE_AND_NUCLEIC_ACID_METABOLIC_PROCESS
SPOP	speckle-type POZ protein					RNA_METABOLIC_PROCESS				NUCLEOBASENUCLEOSIDENUCLEOTIDE_AND_NUCLEIC_ACID_METABOLIC_PROCESS
DDX54	DEAD (Asp-Glu-Ala-Asp) box polypeptide 54					RNA_METABOLIC_PROCESS				NUCLEOBASENUCLEOSIDENUCLEOTIDE_AND_NUCLEIC_ACID_METABOLIC_PROCESS
BCAS2	breast carcinoma amplified sequence 2					RNA_METABOLIC_PROCESS				NUCLEOBASENUCLEOSIDENUCLEOTIDE_AND_NUCLEIC_ACID_METABOLIC_PROCESS
CDC40	cell division cycle 40 homolog (S. cerevisiae)					RNA_METABOLIC_PROCESS				NUCLEOBASENUCLEOSIDENUCLEOTIDE_AND_NUCLEIC_ACID_METABOLIC_PROCESS
LSM4	LSM4 homolog, U6 small nuclear RNA associated (S. cerevisiae)					RNA_METABOLIC_PROCESS				NUCLEOBASENUCLEOSIDENUCLEOTIDE_AND_NUCLEIC_ACID_METABOLIC_PROCESS
LSM6	LSM6 homolog, U6 small nuclear RNA associated (S. cerevisiae)					RNA_METABOLIC_PROCESS				NUCLEOBASENUCLEOSIDENUCLEOTIDE_AND_NUCLEIC_ACID_METABOLIC_PROCESS
PPIG	peptidylprolyl isomerase G (cyclophilin G)					RNA_METABOLIC_PROCESS				NUCLEOBASENUCLEOSIDENUCLEOTIDE_AND_NUCLEIC_ACID_METABOLIC_PROCESS
PRPF3	PRP3 pre-mRNA processing factor 3 homolog (S. cerevisiae)					RNA_METABOLIC_PROCESS				NUCLEOBASENUCLEOSIDENUCLEOTIDE_AND_NUCLEIC_ACID_METABOLIC_PROCESS
SNRPB2	small nuclear ribonucleoprotein polypeptide B''					RNA_METABOLIC_PROCESS				NUCLEOBASENUCLEOSIDENUCLEOTIDE_AND_NUCLEIC_ACID_METABOLIC_PROCESS
SNRPC	small nuclear ribonucleoprotein polypeptide C					RNA_METABOLIC_PROCESS				NUCLEOBASENUCLEOSIDENUCLEOTIDE_AND_NUCLEIC_ACID_METABOLIC_PROCESS
SNRPF	small nuclear ribonucleoprotein polypeptide F					RNA_METABOLIC_PROCESS				NUCLEOBASENUCLEOSIDENUCLEOTIDE_AND_NUCLEIC_ACID_METABOLIC_PROCESS
SNRPN	small nuclear ribonucleoprotein polypeptide N					RNA_METABOLIC_PROCESS				NUCLEOBASENUCLEOSIDENUCLEOTIDE_AND_NUCLEIC_ACID_METABOLIC_PROCESS
SRRM1	serine/arginine repetitive matrix 1					RNA_METABOLIC_PROCESS				NUCLEOBASENUCLEOSIDENUCLEOTIDE_AND_NUCLEIC_ACID_METABOLIC_PROCESS
U2AF1	U2 small nuclear RNA auxiliary factor 1					RNA_METABOLIC_PROCESS				NUCLEOBASENUCLEOSIDENUCLEOTIDE_AND_NUCLEIC_ACID_METABOLIC_PROCESS
SARS	seryl-tRNA synthetase					RNA_METABOLIC_PROCESS				NUCLEOBASENUCLEOSIDENUCLEOTIDE_AND_NUCLEIC_ACID_METABOLIC_PROCESS
DARS	aspartyl-tRNA synthetase					RNA_METABOLIC_PROCESS				NUCLEOBASENUCLEOSIDENUCLEOTIDE_AND_NUCLEIC_ACID_METABOLIC_PROCESS
YARS	tyrosyl-tRNA synthetase					RNA_METABOLIC_PROCESS				NUCLEOBASENUCLEOSIDENUCLEOTIDE_AND_NUCLEIC_ACID_METABOLIC_PROCESS
KARS	lysyl-tRNA synthetase					RNA_METABOLIC_PROCESS				NUCLEOBASENUCLEOSIDENUCLEOTIDE_AND_NUCLEIC_ACID_METABOLIC_PROCESS
HNRPDL	heterogeneous nuclear ribonucleoprotein D-like					RNA_METABOLIC_PROCESS				NUCLEOBASENUCLEOSIDENUCLEOTIDE_AND_NUCLEIC_ACID_METABOLIC_PROCESS
RBPMS	RNA binding protein with multiple splicing					RNA_METABOLIC_PROCESS				NUCLEOBASENUCLEOSIDENUCLEOTIDE_AND_NUCLEIC_ACID_METABOLIC_PROCESS
RAD51	RAD51 homolog (RecA homolog, E. coli) (S. cerevisiae)									NUCLEOBASENUCLEOSIDENUCLEOTIDE_AND_NUCLEIC_ACID_METABOLIC_PROCESS
SET	SET translocation (myeloid leukemia-associated)									NUCLEOBASENUCLEOSIDENUCLEOTIDE_AND_NUCLEIC_ACID_METABOLIC_PROCESS
RAD9A	RAD9 homolog A (S. pombe)									NUCLEOBASENUCLEOSIDENUCLEOTIDE_AND_NUCLEIC_ACID_METABOLIC_PROCESS
CDC6	CDC6 cell division cycle 6 homolog (S. cerevisiae)									NUCLEOBASENUCLEOSIDENUCLEOTIDE_AND_NUCLEIC_ACID_METABOLIC_PROCESS
UBE2V2	ubiquitin-conjugating enzyme E2 variant 2									NUCLEOBASENUCLEOSIDENUCLEOTIDE_AND_NUCLEIC_ACID_METABOLIC_PROCESS
MRE11A	MRE11 meiotic recombination 11 homolog A (S. cerevisiae)									NUCLEOBASENUCLEOSIDENUCLEOTIDE_AND_NUCLEIC_ACID_METABOLIC_PROCESS
RAD50	RAD50 homolog (S. cerevisiae)									NUCLEOBASENUCLEOSIDENUCLEOTIDE_AND_NUCLEIC_ACID_METABOLIC_PROCESS
KPNA2	karyopherin alpha 2 (RAG cohort 1, importin alpha 1)									NUCLEOBASENUCLEOSIDENUCLEOTIDE_AND_NUCLEIC_ACID_METABOLIC_PROCESS
KPNA1	karyopherin alpha 1 (importin alpha 5)									NUCLEOBASENUCLEOSIDENUCLEOTIDE_AND_NUCLEIC_ACID_METABOLIC_PROCESS
DNMT3A	DNA (cytosine-5-)-methyltransferase 3 alpha									NUCLEOBASENUCLEOSIDENUCLEOTIDE_AND_NUCLEIC_ACID_METABOLIC_PROCESS
DNMT3B	DNA (cytosine-5-)-methyltransferase 3 beta									NUCLEOBASENUCLEOSIDENUCLEOTIDE_AND_NUCLEIC_ACID_METABOLIC_PROCESS
DICER1	Dicer1, Dcr-1 homolog (Drosophila)									NUCLEOBASENUCLEOSIDENUCLEOTIDE_AND_NUCLEIC_ACID_METABOLIC_PROCESS
CDKN2D	cyclin-dependent kinase inhibitor 2D (p19, inhibits CDK4)									NUCLEOBASENUCLEOSIDENUCLEOTIDE_AND_NUCLEIC_ACID_METABOLIC_PROCESS
MCM7	MCM7 minichromosome maintenance deficient 7 (S. cerevisiae)									NUCLEOBASENUCLEOSIDENUCLEOTIDE_AND_NUCLEIC_ACID_METABOLIC_PROCESS
HPRT1	hypoxanthine phosphoribosyltransferase 1 (Lesch-Nyhan syndrome)									NUCLEOBASENUCLEOSIDENUCLEOTIDE_AND_NUCLEIC_ACID_METABOLIC_PROCESS
CIDEA	cell death-inducing DFFA-like effector a									NUCLEOBASENUCLEOSIDENUCLEOTIDE_AND_NUCLEIC_ACID_METABOLIC_PROCESS
MSH2	mutS homolog 2, colon cancer, nonpolyposis type 1 (E. coli)									NUCLEOBASENUCLEOSIDENUCLEOTIDE_AND_NUCLEIC_ACID_METABOLIC_PROCESS
MSH3	mutS homolog 3 (E. coli)									NUCLEOBASENUCLEOSIDENUCLEOTIDE_AND_NUCLEIC_ACID_METABOLIC_PROCESS
MSH6	mutS homolog 6 (E. coli)									NUCLEOBASENUCLEOSIDENUCLEOTIDE_AND_NUCLEIC_ACID_METABOLIC_PROCESS
MPG	N-methylpurine-DNA glycosylase									NUCLEOBASENUCLEOSIDENUCLEOTIDE_AND_NUCLEIC_ACID_METABOLIC_PROCESS
OGG1	8-oxoguanine DNA glycosylase									NUCLEOBASENUCLEOSIDENUCLEOTIDE_AND_NUCLEIC_ACID_METABOLIC_PROCESS
TDG	thymine-DNA glycosylase									NUCLEOBASENUCLEOSIDENUCLEOTIDE_AND_NUCLEIC_ACID_METABOLIC_PROCESS
NASP	nuclear autoantigenic sperm protein (histone-binding)									NUCLEOBASENUCLEOSIDENUCLEOTIDE_AND_NUCLEIC_ACID_METABOLIC_PROCESS
DDB2	damage-specific DNA binding protein 2, 48kDa									NUCLEOBASENUCLEOSIDENUCLEOTIDE_AND_NUCLEIC_ACID_METABOLIC_PROCESS
SMC1A	structural maintenance of chromosomes 1A									NUCLEOBASENUCLEOSIDENUCLEOTIDE_AND_NUCLEIC_ACID_METABOLIC_PROCESS
GADD45A	growth arrest and DNA-damage-inducible, alpha									NUCLEOBASENUCLEOSIDENUCLEOTIDE_AND_NUCLEIC_ACID_METABOLIC_PROCESS
UBE2A	ubiquitin-conjugating enzyme E2A (RAD6 homolog)									NUCLEOBASENUCLEOSIDENUCLEOTIDE_AND_NUCLEIC_ACID_METABOLIC_PROCESS
UBE2B	ubiquitin-conjugating enzyme E2B (RAD6 homolog)									NUCLEOBASENUCLEOSIDENUCLEOTIDE_AND_NUCLEIC_ACID_METABOLIC_PROCESS
POLA1	polymerase (DNA directed), alpha 1									NUCLEOBASENUCLEOSIDENUCLEOTIDE_AND_NUCLEIC_ACID_METABOLIC_PROCESS
MLH1	mutL homolog 1, colon cancer, nonpolyposis type 2 (E. coli)									NUCLEOBASENUCLEOSIDENUCLEOTIDE_AND_NUCLEIC_ACID_METABOLIC_PROCESS
RFC3	replication factor C (activator 1) 3, 38kDa									NUCLEOBASENUCLEOSIDENUCLEOTIDE_AND_NUCLEIC_ACID_METABOLIC_PROCESS
POLE	polymerase (DNA directed), epsilon									NUCLEOBASENUCLEOSIDENUCLEOTIDE_AND_NUCLEIC_ACID_METABOLIC_PROCESS
POLD1	polymerase (DNA directed), delta 1, catalytic subunit 125kDa									NUCLEOBASENUCLEOSIDENUCLEOTIDE_AND_NUCLEIC_ACID_METABOLIC_PROCESS
POLE2	polymerase (DNA directed), epsilon 2 (p59 subunit)									NUCLEOBASENUCLEOSIDENUCLEOTIDE_AND_NUCLEIC_ACID_METABOLIC_PROCESS
DDB1	damage-specific DNA binding protein 1, 127kDa									NUCLEOBASENUCLEOSIDENUCLEOTIDE_AND_NUCLEIC_ACID_METABOLIC_PROCESS
XPC	xeroderma pigmentosum, complementation group C									NUCLEOBASENUCLEOSIDENUCLEOTIDE_AND_NUCLEIC_ACID_METABOLIC_PROCESS
HUS1	HUS1 checkpoint homolog (S. pombe)									NUCLEOBASENUCLEOSIDENUCLEOTIDE_AND_NUCLEIC_ACID_METABOLIC_PROCESS
ERCC5	excision repair cross-complementing rodent repair deficiency, complementation group 5 (xeroderma pigmentosum, complementation group G (Cockayne syndrome))									NUCLEOBASENUCLEOSIDENUCLEOTIDE_AND_NUCLEIC_ACID_METABOLIC_PROCESS
RAD23A	RAD23 homolog A (S. cerevisiae)									NUCLEOBASENUCLEOSIDENUCLEOTIDE_AND_NUCLEIC_ACID_METABOLIC_PROCESS
RAD23B	RAD23 homolog B (S. cerevisiae)									NUCLEOBASENUCLEOSIDENUCLEOTIDE_AND_NUCLEIC_ACID_METABOLIC_PROCESS
FEN1	flap structure-specific endonuclease 1									NUCLEOBASENUCLEOSIDENUCLEOTIDE_AND_NUCLEIC_ACID_METABOLIC_PROCESS
RAD52	RAD52 homolog (S. cerevisiae)									NUCLEOBASENUCLEOSIDENUCLEOTIDE_AND_NUCLEIC_ACID_METABOLIC_PROCESS
BLM	Bloom syndrome									NUCLEOBASENUCLEOSIDENUCLEOTIDE_AND_NUCLEIC_ACID_METABOLIC_PROCESS
GADD45G	growth arrest and DNA-damage-inducible, gamma									NUCLEOBASENUCLEOSIDENUCLEOTIDE_AND_NUCLEIC_ACID_METABOLIC_PROCESS
RECQL	RecQ protein-like (DNA helicase Q1-like)									NUCLEOBASENUCLEOSIDENUCLEOTIDE_AND_NUCLEIC_ACID_METABOLIC_PROCESS
RECQL5	RecQ protein-like 5									NUCLEOBASENUCLEOSIDENUCLEOTIDE_AND_NUCLEIC_ACID_METABOLIC_PROCESS
RFC1	replication factor C (activator 1) 1, 145kDa									NUCLEOBASENUCLEOSIDENUCLEOTIDE_AND_NUCLEIC_ACID_METABOLIC_PROCESS
TOP2A	topoisomerase (DNA) II alpha 170kDa									NUCLEOBASENUCLEOSIDENUCLEOTIDE_AND_NUCLEIC_ACID_METABOLIC_PROCESS
PTGES3	prostaglandin E synthase 3 (cytosolic)									NUCLEOBASENUCLEOSIDENUCLEOTIDE_AND_NUCLEIC_ACID_METABOLIC_PROCESS
TEP1	telomerase-associated protein 1									NUCLEOBASENUCLEOSIDENUCLEOTIDE_AND_NUCLEIC_ACID_METABOLIC_PROCESS
ORC1L	origin recognition complex, subunit 1-like (yeast)									NUCLEOBASENUCLEOSIDENUCLEOTIDE_AND_NUCLEIC_ACID_METABOLIC_PROCESS
ORC4L	origin recognition complex, subunit 4-like (yeast)									NUCLEOBASENUCLEOSIDENUCLEOTIDE_AND_NUCLEIC_ACID_METABOLIC_PROCESS
PURA	purine-rich element binding protein A									NUCLEOBASENUCLEOSIDENUCLEOTIDE_AND_NUCLEIC_ACID_METABOLIC_PROCESS
POLB	polymerase (DNA directed), beta									NUCLEOBASENUCLEOSIDENUCLEOTIDE_AND_NUCLEIC_ACID_METABOLIC_PROCESS
REV3L	REV3-like, catalytic subunit of DNA polymerase zeta (yeast)									NUCLEOBASENUCLEOSIDENUCLEOTIDE_AND_NUCLEIC_ACID_METABOLIC_PROCESS
RFC4	replication factor C (activator 1) 4, 37kDa									NUCLEOBASENUCLEOSIDENUCLEOTIDE_AND_NUCLEIC_ACID_METABOLIC_PROCESS
RPA2	replication protein A2, 32kDa									NUCLEOBASENUCLEOSIDENUCLEOTIDE_AND_NUCLEIC_ACID_METABOLIC_PROCESS
MCM3AP	MCM3 minichromosome maintenance deficient 3 (S. cerevisiae) associated protein									NUCLEOBASENUCLEOSIDENUCLEOTIDE_AND_NUCLEIC_ACID_METABOLIC_PROCESS
NOL8	nucleolar protein 8									NUCLEOBASENUCLEOSIDENUCLEOTIDE_AND_NUCLEIC_ACID_METABOLIC_PROCESS
NUP98	nucleoporin 98kDa									NUCLEOBASENUCLEOSIDENUCLEOTIDE_AND_NUCLEIC_ACID_METABOLIC_PROCESS
KCTD13	potassium channel tetramerisation domain containing 13									NUCLEOBASENUCLEOSIDENUCLEOTIDE_AND_NUCLEIC_ACID_METABOLIC_PROCESS
PTMS	parathymosin									NUCLEOBASENUCLEOSIDENUCLEOTIDE_AND_NUCLEIC_ACID_METABOLIC_PROCESS
RPA3	replication protein A3, 14kDa									NUCLEOBASENUCLEOSIDENUCLEOTIDE_AND_NUCLEIC_ACID_METABOLIC_PROCESS
PPT1	palmitoyl-protein thioesterase 1 (ceroid-lipofuscinosis, neuronal 1, infantile)									NUCLEOBASENUCLEOSIDENUCLEOTIDE_AND_NUCLEIC_ACID_METABOLIC_PROCESS
CYCS	cytochrome c, somatic									NUCLEOBASENUCLEOSIDENUCLEOTIDE_AND_NUCLEIC_ACID_METABOLIC_PROCESS
CECR2	cat eye syndrome chromosome region, candidate 2									NUCLEOBASENUCLEOSIDENUCLEOTIDE_AND_NUCLEIC_ACID_METABOLIC_PROCESS
RAD51L3	RAD51-like 3 (S. cerevisiae)									NUCLEOBASENUCLEOSIDENUCLEOTIDE_AND_NUCLEIC_ACID_METABOLIC_PROCESS
TSN	translin									NUCLEOBASENUCLEOSIDENUCLEOTIDE_AND_NUCLEIC_ACID_METABOLIC_PROCESS
PGD	phosphogluconate dehydrogenase									NUCLEOBASENUCLEOSIDENUCLEOTIDE_AND_NUCLEIC_ACID_METABOLIC_PROCESS
ADSS	adenylosuccinate synthase									NUCLEOBASENUCLEOSIDENUCLEOTIDE_AND_NUCLEIC_ACID_METABOLIC_PROCESS
GMPS	guanine monphosphate synthetase									NUCLEOBASENUCLEOSIDENUCLEOTIDE_AND_NUCLEIC_ACID_METABOLIC_PROCESS
PAICS	phosphoribosylaminoimidazole carboxylase, phosphoribosylaminoimidazole succinocarboxamide synthetase									NUCLEOBASENUCLEOSIDENUCLEOTIDE_AND_NUCLEIC_ACID_METABOLIC_PROCESS
NUDT5	nudix (nucleoside diphosphate linked moiety X)-type motif 5									NUCLEOBASENUCLEOSIDENUCLEOTIDE_AND_NUCLEIC_ACID_METABOLIC_PROCESS
FHIT	fragile histidine triad gene									NUCLEOBASENUCLEOSIDENUCLEOTIDE_AND_NUCLEIC_ACID_METABOLIC_PROCESS
REXO2	REX2, RNA exonuclease 2 homolog (S. cerevisiae)									NUCLEOBASENUCLEOSIDENUCLEOTIDE_AND_NUCLEIC_ACID_METABOLIC_PROCESS
BPNT1	3'(2'), 5'-bisphosphate nucleotidase 1									NUCLEOBASENUCLEOSIDENUCLEOTIDE_AND_NUCLEIC_ACID_METABOLIC_PROCESS
CRMP1	collapsin response mediator protein 1									NUCLEOBASENUCLEOSIDENUCLEOTIDE_AND_NUCLEIC_ACID_METABOLIC_PROCESS
ATIC	5-aminoimidazole-4-carboxamide ribonucleotide formyltransferase/IMP cyclohydrolase									NUCLEOBASENUCLEOSIDENUCLEOTIDE_AND_NUCLEIC_ACID_METABOLIC_PROCESS
PRPSAP1	phosphoribosyl pyrophosphate synthetase-associated protein 1									NUCLEOBASENUCLEOSIDENUCLEOTIDE_AND_NUCLEIC_ACID_METABOLIC_PROCESS
TK1	thymidine kinase 1, soluble									NUCLEOBASENUCLEOSIDENUCLEOTIDE_AND_NUCLEIC_ACID_METABOLIC_PROCESS
EIF2AK3	eukaryotic translation initiation factor 2-alpha kinase 3
GLMN	glomulin, FKBP associated protein
TNFRSF8	tumor necrosis factor receptor superfamily, member 8
TLR3	toll-like receptor 3
EIF2B2	eukaryotic translation initiation factor 2B, subunit 2 beta, 39kDa
HRSP12	heat-responsive protein 12
MAST2	microtubule associated serine/threonine kinase 2
EIF1B	eukaryotic translation initiation factor 1B
EIF2C1	eukaryotic translation initiation factor 2C, 1
H2AFY	H2A histone family, member Y
BMI1	B lymphoma Mo-MLV insertion region (mouse)
BCL2L1	BCL2-like 1
BNIP3L	BCL2/adenovirus E1B 19kDa interacting protein 3-like
STUB1	STIP1 homology and U-box containing protein 1
UBE2D1	ubiquitin-conjugating enzyme E2D 1 (UBC4/5 homolog, yeast)
APC	adenomatosis polyposis coli
CDKN2B	cyclin-dependent kinase inhibitor 2B (p15, inhibits CDK4)
CDKN2C	cyclin-dependent kinase inhibitor 2C (p18, inhibits CDK4)
MAPRE1	microtubule-associated protein, RP/EB family, member 1
CCND1	cyclin D1
CCND3	cyclin D3
TDGF1	teratocarcinoma-derived growth factor 1
ARF6	ADP-ribosylation factor 6
RNF139	ring finger protein 139
BARD1	BRCA1 associated RING domain 1
EGLN2	egl nine homolog 2 (C. elegans)
HGS	hepatocyte growth factor-regulated tyrosine kinase substrate
EHMT1	euchromatic histone-lysine N-methyltransferase 1
RBBP4	retinoblastoma binding protein 4
ACTL6A	actin-like 6A
HDAC1	histone deacetylase 1
HDAC3	histone deacetylase 3
CHAF1A	chromatin assembly factor 1, subunit A (p150)
CHAF1B	chromatin assembly factor 1, subunit B (p60)
MTA2	metastasis associated 1 family, member 2
SAFB	scaffold attachment factor B
SATB1	special AT-rich sequence binding protein 1 (binds to nuclear matrix/scaffold-associating DNA's)
AMFR	autocrine motility factor receptor
TRAF6	TNF receptor-associated factor 6
UBE3C	ubiquitin protein ligase E3C
CHEK2	CHK2 checkpoint homolog (S. pombe)
IFI16	interferon, gamma-inducible protein 16
TOPORS	topoisomerase I binding, arginine/serine-rich
TRIAP1	TP53 regulated inhibitor of apoptosis 1
CCNA2	cyclin A2
MAP2K6	mitogen-activated protein kinase kinase 6
PPP1R15A	protein phosphatase 1, regulatory (inhibitor) subunit 15A
BRCC3	BRCA1/BRCA2-containing complex, subunit 3
CDKN1C	cyclin-dependent kinase inhibitor 1C (p57, Kip2)
HIPK2	homeodomain interacting protein kinase 2
CDC23	CDC23 (cell division cycle 23, yeast, homolog)
ZW10	ZW10, kinetochore associated, homolog (Drosophila)
ZWINT	ZW10 interactor
ACIN1	apoptotic chromatin condensation inducer 1
CDC25C	cell division cycle 25C
CCNE2	cyclin E2
PTEN	phosphatase and tensin homolog (mutated in multiple advanced cancers 1)
SERTAD1	SERTA domain containing 1
BCCIP	BRCA2 and CDKN1A interacting protein
CCNG1	cyclin G1
HERC5	hect domain and RLD 5
CDK10	cyclin-dependent kinase (CDC2-like) 10
TAF1	TAF1 RNA polymerase II, TATA box binding protein (TBP)-associated factor, 250kDa
CUL1	cullin 1
CUL2	cullin 2
CUL4A	cullin 4A
CUL3	cullin 3
RNF11	ring finger protein 11
TSG101	tumor susceptibility gene 101
CDC20	CDC20 cell division cycle 20 homolog (S. cerevisiae)
UBE3A	ubiquitin protein ligase E3A (human papilloma virus E6-associated protein, Angelman syndrome)
UFD1L	ubiquitin fusion degradation 1 like (yeast)
NEDD8	neural precursor cell expressed, developmentally down-regulated 8
UBE2E1	ubiquitin-conjugating enzyme E2E 1 (UBC4/5 homolog, yeast)
BTRC	beta-transducin repeat containing
FZR1	fizzy/cell division cycle 20 related 1 (Drosophila)
PSMD14	proteasome (prosome, macropain) 26S subunit, non-ATPase, 14
SMURF2	SMAD specific E3 ubiquitin protein ligase 2
UBE2D2	ubiquitin-conjugating enzyme E2D 2 (UBC4/5 homolog, yeast)
UBE2D3	ubiquitin-conjugating enzyme E2D 3 (UBC4/5 homolog, yeast)
UBE2I	ubiquitin-conjugating enzyme E2I (UBC9 homolog, yeast)
UBE2L3	ubiquitin-conjugating enzyme E2L 3
SIAH1	seven in absentia homolog 1 (Drosophila)
SAE1	-
TRIM23	tripartite motif-containing 23
ISG15	ISG15 ubiquitin-like modifier
UCHL1	ubiquitin carboxyl-terminal esterase L1 (ubiquitin thiolesterase)
SENP7	SUMO1/sentrin specific peptidase 7
MXI1	MAX interactor 1
PDIA3	protein disulfide isomerase family A, member 3
SUPT7L	suppressor of Ty 7 (S. cerevisiae)-like
TAF3	TAF3 RNA polymerase II, TATA box binding protein (TBP)-associated factor, 140kDa
RCC1	regulator of chromosome condensation 1
SKP2	S-phase kinase-associated protein 2 (p45)
BUB1B	BUB1 budding uninhibited by benzimidazoles 1 homolog beta (yeast)
CHFR	checkpoint with forkhead and ring finger domains
MAD2L1	MAD2 mitotic arrest deficient-like 1 (yeast)
LEFTY2	left-right determination factor 2
SMAD1	SMAD, mothers against DPP homolog 1 (Drosophila)
SMAD5	SMAD, mothers against DPP homolog 5 (Drosophila)
KIF3B	kinesin family member 3B
AXIN1	axin 1
HOXB1	homeobox B1
ZFYVE9	zinc finger, FYVE domain containing 9
GDF9	growth differentiation factor 9
SMAD7	SMAD, mothers against DPP homolog 7 (Drosophila)
EIF2B1	eukaryotic translation initiation factor 2B, subunit 1 alpha, 26kDa
PPP1R9B	protein phosphatase 1, regulatory subunit 9B, spinophilin
ASNS	asparagine synthetase
FOXC1	forkhead box C1
CDC16	CDC16 cell division cycle 16 homolog (S. cerevisiae)
NEK2	NIMA (never in mitosis gene a)-related kinase 2
TP53BP2	tumor protein p53 binding protein, 2
ZBTB17	zinc finger and BTB domain containing 17
NF1	neurofibromin 1 (neurofibromatosis, von Recklinghausen disease, Watson disease)
KPNA4	karyopherin alpha 4 (importin alpha 3)
RERE	arginine-glutamic acid dipeptide (RE) repeats
GLI3	GLI-Kruppel family member GLI3 (Greig cephalopolysyndactyly syndrome)
NUP205	nucleoporin 205kDa
RANBP2	RAN binding protein 2
NDUFS3	NADH dehydrogenase (ubiquinone) Fe-S protein 3, 30kDa (NADH-coenzyme Q reductase)
SERTAD2	SERTA domain containing 2
ING5	inhibitor of growth family, member 5
PRMT2	protein arginine methyltransferase 2
AIP	aryl hydrocarbon receptor interacting protein
PEX6	peroxisomal biogenesis factor 6
KIF11	kinesin family member 11
TUBG1	tubulin, gamma 1
NUMA1	nuclear mitotic apparatus protein 1
ATXN7	ataxin 7
RP1	retinitis pigmentosa 1 (autosomal dominant)
DYNLRB1	dynein, light chain, roadblock-type 1
COPS3	COP9 constitutive photomorphogenic homolog subunit 3 (Arabidopsis)
TOPBP1	topoisomerase (DNA) II binding protein 1
PPM1D	protein phosphatase 1D magnesium-dependent, delta isoform
GZMA	granzyme A (granzyme 1, cytotoxic T-lymphocyte-associated serine esterase 3)
MIF	macrophage migration inhibitory factor (glycosylation-inhibiting factor)
LTA4H	leukotriene A4 hydrolase
MCAT	malonyl CoA:ACP acyltransferase (mitochondrial)
HDAC9	histone deacetylase 9
TPD52	tumor protein D52
SLIT2	slit homolog 2 (Drosophila)
BAK1	BCL2-antagonist/killer 1
TAZ	tafazzin (cardiomyopathy, dilated 3A (X-linked); endocardial fibroelastosis 2; Barth syndrome)
HBXIP	hepatitis B virus x interacting protein
CTBP1	C-terminal binding protein 1
CTBP2	C-terminal binding protein 2
ATP7B	ATPase, Cu++ transporting, beta polypeptide
ETS1	v-ets erythroblastosis virus E26 oncogene homolog 1 (avian)
TRPV5	transient receptor potential cation channel, subfamily V, member 5
AASS	aminoadipate-semialdehyde synthase
STOM	stomatin
IRAK1	interleukin-1 receptor-associated kinase 1
2012-09-07	septin 7
2012-09-09	septin 9
NAT8	N-acetyltransferase 8 (camello like)
DCTN2	dynactin 2 (p50)
MPHOSPH6	M-phase phosphoprotein 6
IFRD1	interferon-related developmental regulator 1
GNPDA1	glucosamine-6-phosphate deaminase 1
CETP	cholesteryl ester transfer protein, plasma
LPL	lipoprotein lipase
DGAT1	diacylglycerol O-acyltransferase homolog 1 (mouse)
DHCR24	24-dehydrocholesterol reductase
DNAJB6	DnaJ (Hsp40) homolog, subfamily B, member 6
BTG1	B-cell translocation gene 1, anti-proliferative
SART1	squamous cell carcinoma antigen recognised by T cells
BOC	Boc homolog (mouse)
ATP1A1	ATPase, Na+/K+ transporting, alpha 1 polypeptide
TMPRSS3	transmembrane protease, serine 3
ECHS1	enoyl Coenzyme A hydratase, short chain, 1, mitochondrial
CENPJ	centromere protein J
WWP2	WW domain containing E3 ubiquitin protein ligase 2
PAK2	p21 (CDKN1A)-activated kinase 2
CDC42BPB	CDC42 binding protein kinase beta (DMPK-like)
DPM1	dolichyl-phosphate mannosyltransferase polypeptide 1, catalytic subunit
GYPC	glycophorin C (Gerbich blood group)
IKBKE	inhibitor of kappa light polypeptide gene enhancer in B-cells, kinase epsilon
RPN1	ribophorin I
PTPRZ1	protein tyrosine phosphatase, receptor-type, Z polypeptide 1
SSH1	slingshot homolog 1 (Drosophila)
PPP1CA	protein phosphatase 1, catalytic subunit, alpha isoform
PPP2R3A	protein phosphatase 2 (formerly 2A), regulatory subunit B'', alpha
PTPN14	protein tyrosine phosphatase, non-receptor type 14
STK3	serine/threonine kinase 3 (STE20 homolog, yeast)
TNKS	tankyrase, TRF1-interacting ankyrin-related ADP-ribose polymerase
PARP4	poly (ADP-ribose) polymerase family, member 4
TSSK3	testis-specific serine kinase 3
RAF1	v-raf-1 murine leukemia viral oncogene homolog 1
ERG	v-ets erythroblastosis virus E26 oncogene homolog (avian)
WNK4	WNK lysine deficient protein kinase 4
GSG2	germ cell associated 2 (haspin)
CAMK4	calcium/calmodulin-dependent protein kinase IV
ULK1	unc-51-like kinase 1 (C. elegans)
COL4A3BP	collagen, type IV, alpha 3 (Goodpasture antigen) binding protein
FBXO11	F-box protein 11
PLOD3	procollagen-lysine, 2-oxoglutarate 5-dioxygenase 3
CALCOCO2	calcium binding and coiled-coil domain 2
FDXR	ferredoxin reductase
SCP2	sterol carrier protein 2
GPS1	G protein pathway suppressor 1
GPS2	G protein pathway suppressor 2
UXT	ubiquitously-expressed transcript
TUBGCP6	tubulin, gamma complex associated protein 6
S100A12	S100 calcium binding protein A12
ATOX1	ATX1 antioxidant protein 1 homolog (yeast)
COX17	COX17 cytochrome c oxidase assembly homolog (S. cerevisiae)
MKKS	McKusick-Kaufman syndrome
HSPA4L	heat shock 70kDa protein 4-like
HSPE1	heat shock 10kDa protein 1 (chaperonin 10)
ERP29	endoplasmic reticulum protein 29
LRPAP1	low density lipoprotein receptor-related protein associated protein 1
CLPX	ClpX caseinolytic peptidase X homolog (E. coli)
DNAJC7	DnaJ (Hsp40) homolog, subfamily C, member 7
FKBP4	FK506 binding protein 4, 59kDa
FKBP5	FK506 binding protein 5
PIN4	protein (peptidylprolyl cis/trans isomerase) NIMA-interacting, 4 (parvulin)
TBCA	tubulin-specific chaperone a
KIF13B	kinesin family member 13B
KIF5A	kinesin family member 5A
PRKRA	protein kinase, interferon-inducible double stranded RNA dependent activator
MAGED1	melanoma antigen family D, 1
BAP1	BRCA1 associated protein-1 (ubiquitin carboxy-terminal hydrolase)
ING1	inhibitor of growth family, member 1
LDOC1	leucine zipper, down-regulated in cancer 1
NDN	necdin homolog (mouse)
TOB1	transducer of ERBB2, 1
CD1D	CD1d molecule
PRL	prolactin
DVL1	dishevelled, dsh homolog 1 (Drosophila)
IRX4	iroquois homeobox protein 4
NUP160	nucleoporin 160kDa
CTNNB1	catenin (cadherin-associated protein), beta 1, 88kDa
S100A4	S100 calcium binding protein A4
IFNG	interferon, gamma
TAC1	tachykinin, precursor 1 (substance K, substance P, neurokinin 1, neurokinin 2, neuromedin L, neurokinin alpha, neuropeptide K, neuropeptide gamma)
IKZF1	IKAROS family zinc finger 1 (Ikaros)
RAB14	RAB14, member RAS oncogene family
EXOC5	exocyst complex component 5
SCAMP1	secretory carrier membrane protein 1
PDHB	pyruvate dehydrogenase (lipoamide) beta
SDHB	succinate dehydrogenase complex, subunit B, iron sulfur (Ip)
2012-09-05	septin 5
STX5	syntaxin 5
UQCRC1	ubiquinol-cytochrome c reductase core protein I
ABCD3	ATP-binding cassette, sub-family D (ALD), member 3
S100A2	S100 calcium binding protein A2
OTUD7B	OTU domain containing 7B
TAX1BP3	Tax1 (human T-cell leukemia virus type I) binding protein 3
PARD3	par-3 partitioning defective 3 homolog (C. elegans)
GADD45B	growth arrest and DNA-damage-inducible, beta
NCOA4	nuclear receptor coactivator 4
2012-09-06	septin 6
TOMM34	translocase of outer mitochondrial membrane 34
RNH1	ribonuclease/angiogenin inhibitor 1
ARHGDIA	Rho GDP dissociation inhibitor (GDI) alpha
NUPR1	-
LYST	lysosomal trafficking regulator
EIF1AX	eukaryotic translation initiation factor 1A, X-linked
EIF2S3	eukaryotic translation initiation factor 2, subunit 3 gamma, 52kDa
ATXN2	ataxin 2
GLUD1	glutamate dehydrogenase 1
ALDH18A1	aldehyde dehydrogenase 18 family, member A1
GOT2	glutamic-oxaloacetic transaminase 2, mitochondrial (aspartate aminotransferase 2)
IFNGR2	interferon gamma receptor 2 (interferon gamma transducer 1)
CCDC130	coiled-coil domain containing 130
PRDX5	peroxiredoxin 5
NDUFA6	NADH dehydrogenase (ubiquinone) 1 alpha subcomplex, 6, 14kDa
NDUFS2	NADH dehydrogenase (ubiquinone) Fe-S protein 2, 49kDa (NADH-coenzyme Q reductase)
PDLIM1	PDZ and LIM domain 1 (elfin)
SSR1	signal sequence receptor, alpha (translocon-associated protein alpha)
BCKDK	branched chain ketoacid dehydrogenase kinase
GCSH	glycine cleavage system protein H (aminomethyl carrier)
KIFAP3	kinesin-associated protein 3
NRBP1	nuclear receptor binding protein 1
ARFGAP3	ADP-ribosylation factor GTPase activating protein 3
ARL4D	ADP-ribosylation factor-like 4D
PDIA4	protein disulfide isomerase family A, member 4
SDAD1	SDA1 domain containing 1
SIX3	sine oculis homeobox homolog 3 (Drosophila)
DLX2	distal-less homeobox 2
HESX1	homeobox, ES cell expressed 1
VAMP3	vesicle-associated membrane protein 3 (cellubrevin)
TAPBP	TAP binding protein (tapasin)
APC2	adenomatosis polyposis coli 2
TCAP	titin-cap (telethonin)
GH1	growth hormone 1
SLC2A1	solute carrier family 2 (facilitated glucose transporter), member 1
RBL1	retinoblastoma-like 1 (p107)
RBL2	retinoblastoma-like 2 (p130)
BCL2L2	BCL2-like 2
BAG1	BCL2-associated athanogene
SERPINB9	serpin peptidase inhibitor, clade B (ovalbumin), member 9
TNFRSF10D	tumor necrosis factor receptor superfamily, member 10d, decoy with truncated death domain
CBX4	chromobox homolog 4 (Pc class homolog, Drosophila)
DAD1	defender against cell death 1
GLO1	glyoxalase I
TAX1BP1	Tax1 (human T-cell leukemia virus type I) binding protein 1
TPT1	tumor protein, translationally-controlled 1
PSMB10	proteasome (prosome, macropain) subunit, beta type, 10
STAMBP	STAM binding protein
PIAS1	protein inhibitor of activated STAT, 1
STAT4	signal transducer and activator of transcription 4
SLC25A12	solute carrier family 25 (mitochondrial carrier, Aralar), member 12
SLC1A1	solute carrier family 1 (neuronal/epithelial high affinity glutamate transporter, system Xag), member 1
SLC25A22	solute carrier family 25 (mitochondrial carrier: glutamate), member 22
MVP	major vault protein
SCNN1A	sodium channel, nonvoltage-gated 1 alpha
SCNN1G	sodium channel, nonvoltage-gated 1, gamma
NR1H4	nuclear receptor subfamily 1, group H, member 4
APOL2	apolipoprotein L, 2
PDK1	pyruvate dehydrogenase kinase, isozyme 1
SCARF1	scavenger receptor class F, member 1
STAB2	stabilin 2
ERBB2IP	erbb2 interacting protein
DSTN	destrin (actin depolymerizing factor)
CUL7	cullin 7
HERPUD1	homocysteine-inducible, endoplasmic reticulum stress-inducible, ubiquitin-like domain member 1
HSPB3	heat shock 27kDa protein 3
CCL18	chemokine (C-C motif) ligand 18 (pulmonary and activation-regulated)
RAC3	ras-related C3 botulinum toxin substrate 3 (rho family, small GTP binding protein Rac3)
PCNT	pericentrin (kendrin)
COPZ1	coatomer protein complex, subunit zeta 1
ARCN1	archain 1
TAP2	transporter 2, ATP-binding cassette, sub-family B (MDR/TAP)
PAX6	paired box gene 6 (aniridia, keratitis)
FLI1	Friend leukemia virus integration 1
PROX1	prospero-related homeobox 1
CRX	cone-rod homeobox
SIX6	sine oculis homeobox homolog 6 (Drosophila)
LHX1	LIM homeobox 1
TLE2	transducin-like enhancer of split 2 (E(sp1) homolog, Drosophila)
TLE3	transducin-like enhancer of split 3 (E(sp1) homolog, Drosophila)
AES	amino-terminal enhancer of split
FABP1	fatty acid binding protein 1, liver
LHX3	LIM homeobox 3
MSX1	msh homeobox homolog 1 (Drosophila)
EEF1D	eukaryotic translation elongation factor 1 delta (guanine nucleotide exchange protein)
MIER1	mesoderm induction early response 1 homolog (Xenopus laevis)
NDFIP1	Nedd4 family interacting protein 1
NDFIP2	Nedd4 family interacting protein 2
RHOC	ras homolog gene family, member C
MRAS	muscle RAS oncogene homolog
MEF2C	MADS box transcription enhancer factor 2, polypeptide C (myocyte enhancer factor 2C)
MEF2A	MADS box transcription enhancer factor 2, polypeptide A (myocyte enhancer factor 2A)
MEF2D	MADS box transcription enhancer factor 2, polypeptide D (myocyte enhancer factor 2D)
SIX1	sine oculis homeobox homolog 1 (Drosophila)
STX11	syntaxin 11
SLC16A2	solute carrier family 16, member 2 (monocarboxylic acid transporter 8)
ASAH1	N-acylsphingosine amidohydrolase (acid ceramidase) 1
SCNN1B	sodium channel, nonvoltage-gated 1, beta (Liddle syndrome)
FXYD1	FXYD domain containing ion transport regulator 1 (phospholemman)
SLC4A2	solute carrier family 4, anion exchanger, member 2 (erythrocyte membrane protein band 3-like 1)
SH3GL1	SH3-domain GRB2-like 1
ATN1	atrophin 1
SOX8	SRY (sex determining region Y)-box 8
NME3	non-metastatic cells 3, protein expressed in
PDCD5	programmed cell death 5
POR	P450 (cytochrome) oxidoreductase
MVK	mevalonate kinase (mevalonic aciduria)
PRF1	perforin 1 (pore forming protein)
LGALS3BP	lectin, galactoside-binding, soluble, 3 binding protein
HLA-G	HLA-G histocompatibility antigen, class I, G
FABP5	fatty acid binding protein 5 (psoriasis-associated)
ATP2A2	ATPase, Ca++ transporting, cardiac muscle, slow twitch 2
KRT15	keratin 15
MGLL	monoglyceride lipase
AKR1B1	aldo-keto reductase family 1, member B1 (aldose reductase)
STIP1	stress-induced-phosphoprotein 1 (Hsp70/Hsp90-organizing protein)
ISL1	ISL1 transcription factor, LIM/homeodomain, (islet-1)
OGDH	oxoglutarate (alpha-ketoglutarate) dehydrogenase (lipoamide)
RUNX1T1	runt-related transcription factor 1; translocated to, 1 (cyclin D-related)
PTN	pleiotrophin (heparin binding growth factor 8, neurite growth-promoting factor 1)
POU3F2	POU domain, class 3, transcription factor 2
TGFBR2	transforming growth factor, beta receptor II (70/80kDa)
GNL3	guanine nucleotide binding protein-like 3 (nucleolar)
HAS1	hyaluronan synthase 1
DLX5	distal-less homeobox 5
ARSE	arylsulfatase E (chondrodysplasia punctata 1)
ETS2	v-ets erythroblastosis virus E26 oncogene homolog 2 (avian)
MSX2	msh homeobox homolog 2 (Drosophila)
PREP	prolyl endopeptidase
PSMC4	proteasome (prosome, macropain) 26S subunit, ATPase, 4
SENP1	SUMO1/sentrin specific peptidase 1
BPY2	basic charge, Y-linked, 2
PPAP2B	phosphatidic acid phosphatase type 2B
HOXA10	homeobox A10
BRD2	bromodomain containing 2
KCNQ1	potassium voltage-gated channel, KQT-like subfamily, member 1
KCNMB1	potassium large conductance calcium-activated channel, subfamily M, beta member 1
ABCC9	ATP-binding cassette, sub-family C (CFTR/MRP), member 9
CACNA1A	calcium channel, voltage-dependent, P/Q type, alpha 1A subunit
FTL	ferritin, light polypeptide
CSH2	chorionic somatomammotropin hormone 2
OR10J1	olfactory receptor, family 10, subfamily J, member 1
DNALI1	dynein, axonemal, light intermediate chain 1
ECSIT	ECSIT homolog (Drosophila)
DST	dystonin
NACA	nascent-polypeptide-associated complex alpha polypeptide
RPL34	ribosomal protein L34
RPL38	ribosomal protein L38
RRBP1	ribosome binding protein 1 homolog 180kDa (dog)
CSE1L	CSE1 chromosome segregation 1-like (yeast)
SRA1	steroid receptor RNA activator 1
CYR61	cysteine-rich, angiogenic inducer, 61
MAPRE2	microtubule-associated protein, RP/EB family, member 2
PDAP1	PDGFA associated protein 1
MXD1	MAX dimerization protein 1
NUDC	nuclear distribution gene C homolog (A. nidulans)
BUB3	BUB3 budding uninhibited by benzimidazoles 3 homolog (yeast)
CBFA2T2	core-binding factor, runt domain, alpha subunit 2; translocated to, 2
CBFA2T3	core-binding factor, runt domain, alpha subunit 2; translocated to, 3
HDGF	hepatoma-derived growth factor (high-mobility group protein 1-like)
MTCP1	mature T-cell proliferation 1
REG1B	regenerating islet-derived 1 beta (pancreatic stone protein, pancreatic thread protein)
TAL1	T-cell acute lymphocytic leukemia 1
ATP6V1E1	ATPase, H+ transporting, lysosomal 31kDa, V1 subunit E1
HOOK2	hook homolog 2 (Drosophila)
TNNT1	troponin T type 1 (skeletal, slow)
FH	fumarate hydratase
GOLGA4	golgi autoantigen, golgin subfamily a, 4
RAB13	RAB13, member RAS oncogene family
SEC23A	Sec23 homolog A (S. cerevisiae)
SEC23B	Sec23 homolog B (S. cerevisiae)
CTNNA3	catenin (cadherin-associated protein), alpha 3
WNT2B	wingless-type MMTV integration site family, member 2B
HOXA11	homeobox A11
PHLDA3	pleckstrin homology-like domain, family A, member 3
PITX1	paired-like homeodomain transcription factor 1
SOX10	SRY (sex determining region Y)-box 10
ASS1	argininosuccinate synthetase 1
CHRNB1	cholinergic receptor, nicotinic, beta 1 (muscle)
CDS1	CDP-diacylglycerol synthase (phosphatidate cytidylyltransferase) 1
OPN1MW	opsin 1 (cone pigments), medium-wave-sensitive (color blindness, deutan)
OPN1LW	opsin 1 (cone pigments), long-wave-sensitive (color blindness, protan)
TBL1X	transducin (beta)-like 1X-linked
CRYZ	crystallin, zeta (quinone reductase)
OAT	ornithine aminotransferase (gyrate atrophy)
SORD	sorbitol dehydrogenase
TIMM13	translocase of inner mitochondrial membrane 13 homolog (yeast)
HTR1E	5-hydroxytryptamine (serotonin) receptor 1E
HTR4	5-hydroxytryptamine (serotonin) receptor 4
ACAD8	acyl-Coenzyme A dehydrogenase family, member 8
ACOT8	acyl-CoA thioesterase 8
ACP6	acid phosphatase 6, lysophosphatidic
APOL1	apolipoprotein L, 1
IK	IK cytokine, down-regulator of HLA II
CIITA	class II, major histocompatibility complex, transactivator
RFX1	regulatory factor X, 1 (influences HLA class II expression)
XBP1	X-box binding protein 1
GLRA2	glycine receptor, alpha 2
AKAP11	A kinase (PRKA) anchor protein 11
LILRA3	leukocyte immunoglobulin-like receptor, subfamily A (without TM domain), member 3
HLA-B	major histocompatibility complex, class I, B
IL17RB	interleukin 17 receptor B
MLF2	myeloid leukemia factor 2
TALDO1	transaldolase 1
GNB2	guanine nucleotide binding protein (G protein), beta polypeptide 2
PTGS2	prostaglandin-endoperoxide synthase 2 (prostaglandin G/H synthase and cyclooxygenase)
AKAP9	A kinase (PRKA) anchor protein (yotiao) 9
HAP1	huntingtin-associated protein 1 (neuroan 1)
AR	androgen receptor (dihydrotestosterone receptor; testicular feminization; spinal and bulbar muscular atrophy; Kennedy disease)
PGR	progesterone receptor
COX5B	cytochrome c oxidase subunit Vb
HOXB2	homeobox B2
CYB5R3	cytochrome b5 reductase 3
EPB41	erythrocyte membrane protein band 4.1 (elliptocytosis 1, RH-linked)
ABCB7	ATP-binding cassette, sub-family B (MDR/TAP), member 7
HBB	hemoglobin, beta
LRCH4	leucine-rich repeats and calponin homology (CH) domain containing 4
NDUFV2	NADH dehydrogenase (ubiquinone) flavoprotein 2, 24kDa
NUMBL	numb homolog (Drosophila)-like
PAFAH1B3	platelet-activating factor acetylhydrolase, isoform Ib, gamma subunit 29kDa
SIM1	single-minded homolog 1 (Drosophila)
ZNF384	zinc finger protein 384
CORO2A	coronin, actin binding protein, 2A
PRKAR2A	protein kinase, cAMP-dependent, regulatory, type II, alpha
ZBTB33	zinc finger and BTB domain containing 33
ROR2	receptor tyrosine kinase-like orphan receptor 2
ANXA3	annexin A3
ARFRP1	ADP-ribosylation factor related protein 1
BCAM	basal cell adhesion molecule (Lutheran blood group)
CASKIN1	CASK interacting protein 1
ESR1	estrogen receptor 1
GDI2	GDP dissociation inhibitor 2
IL1RL1	interleukin 1 receptor-like 1
ITGB3BP	integrin beta 3 binding protein (beta3-endonexin)
MAPK7	mitogen-activated protein kinase 7
MCC	mutated in colorectal cancers
MPP1	membrane protein, palmitoylated 1, 55kDa
MTA1	metastasis associated 1
NR1I3	nuclear receptor subfamily 1, group I, member 3
NR2F1	nuclear receptor subfamily 2, group F, member 1
NR2F6	nuclear receptor subfamily 2, group F, member 6
NR3C2	nuclear receptor subfamily 3, group C, member 2
NR4A1	nuclear receptor subfamily 4, group A, member 1
OXT	oxytocin, prepro- (neurophysin I)
PSTPIP1	proline-serine-threonine phosphatase interacting protein 1
RAC2	ras-related C3 botulinum toxin substrate 2 (rho family, small GTP binding protein Rac2)
RANBP1	RAN binding protein 1
RIT1	Ras-like without CAAX 1
RND2	Rho family GTPase 2
RSU1	Ras suppressor protein 1
SRF	serum response factor (c-fos serum response element-binding transcription factor)
STAT6	signal transducer and activator of transcription 6, interleukin-4 induced
TRIP10	thyroid hormone receptor interactor 10
TRRAP	transformation/transcription domain-associated protein
ARIH2	ariadne homolog 2 (Drosophila)
HHEX	homeobox, hematopoietically expressed
HOXA9	homeobox A9
LMO2	LIM domain only 2 (rhombotin-like 1)
NKX3-1	NK3 transcription factor related, locus 1 (Drosophila)
PAEP	progestagen-associated endometrial protein (placental protein 14, pregnancy-associated endometrial alpha-2-globulin, alpha uterine protein)
RARG	retinoic acid receptor, gamma
SPDEF	SAM pointed domain containing ets transcription factor
ZMYM3	zinc finger, MYM-type 3
76P	-
ACAT1	acetyl-Coenzyme A acetyltransferase 1 (acetoacetyl Coenzyme A thiolase)
ACPP	acid phosphatase, prostate
ACTA2	actin, alpha 2, smooth muscle, aorta
ACTL6B	actin-like 6B
ACTR3B	ARP3 actin-related protein 3 homolog B (yeast)
ACTR5	ARP5 actin-related protein 5 homolog (yeast)
ACTR6	ARP6 actin-related protein 6 homolog (yeast)
ACTR8	ARP8 actin-related protein 8 homolog (yeast)
ADARB2	adenosine deaminase, RNA-specific, B2 (RED2 homolog rat)
AGL	amylo-1, 6-glucosidase, 4-alpha-glucanotransferase (glycogen debranching enzyme, glycogen storage disease type III)
AGR2	anterior gradient 2 homolog (Xenopus laevis)
AHCTF1	AT hook containing transcription factor 1
AHCY	S-adenosylhomocysteine hydrolase
AJAP1	adherens junction associated protein 1
AK2	adenylate kinase 2
AKAP1	A kinase (PRKA) anchor protein 1
AKAP13	A kinase (PRKA) anchor protein 13
ALDH1B1	aldehyde dehydrogenase 1 family, member B1
ALPP	alkaline phosphatase, placental (Regan isozyme)
ANAPC1	anaphase promoting complex subunit 1
ANGPTL1	angiopoietin-like 1
ANP32B	acidic (leucine-rich) nuclear phosphoprotein 32 family, member B
ANTXR1	anthrax toxin receptor 1
ANXA13	annexin A13
APRT	adenine phosphoribosyltransferase
ARD1B	ARD1 homolog B (S. cerevisiae)
ARF4	ADP-ribosylation factor 4
ARHGEF4	Rho guanine nucleotide exchange factor (GEF) 4
ARID1B	AT rich interactive domain 1B (SWI1-like)
ARID2	AT rich interactive domain 2 (ARID, RFX-like)
ARID3A	AT rich interactive domain 3A (BRIGHT- like)
ARID4B	AT rich interactive domain 4B (RBP1- like)
ARL3	ADP-ribosylation factor-like 3
ARL5B	ADP-ribosylation factor-like 5B
ARNT	aryl hydrocarbon receptor nuclear translocator
ASCC2	activating signal cointegrator 1 complex subunit 2
ASCL1	achaete-scute complex-like 1 (Drosophila)
ASCL2	achaete-scute complex-like 2 (Drosophila)
ASXL2	additional sex combs like 2 (Drosophila)
ATAD2	ATPase family, AAA domain containing 2
ATF3	activating transcription factor 3
ATG5	ATG5 autophagy related 5 homolog (S. cerevisiae)
ATP5F1	ATP synthase, H+ transporting, mitochondrial F0 complex, subunit B1
ATP5L	ATP synthase, H+ transporting, mitochondrial F0 complex, subunit G
ATP5O	ATP synthase, H+ transporting, mitochondrial F1 complex, O subunit (oligomycin sensitivity conferring protein)
B2M	beta-2-microglobulin
BACH1	BTB and CNC homology 1, basic leucine zipper transcription factor 1
BANP	BTG3 associated nuclear protein
BARHL1	BarH-like 1 (Drosophila)
BAT3	HLA-B associated transcript 3
BATF	basic leucine zipper transcription factor, ATF-like
BAZ1B	bromodomain adjacent to zinc finger domain, 1B
BCL11B	B-cell CLL/lymphoma 11B (zinc finger protein)
BCL9	B-cell CLL/lymphoma 9
BLOC1S1	biogenesis of lysosome-related organelles complex-1, subunit 1
BRI3BP	BRI3 binding protein
BRMS1	breast cancer metastasis suppressor 1
BRP44L	brain protein 44-like
BRWD1	bromodomain and WD repeat domain containing 1
BRWD3	bromodomain and WD repeat domain containing 3
BTAF1	BTAF1 RNA polymerase II, B-TFIID transcription factor-associated, 170kDa (Mot1 homolog, S. cerevisiae)
BTBD2	BTB (POZ) domain containing 2
C10ORF12	chromosome 10 open reading frame 12
C11ORF65	chromosome 11 open reading frame 65
C12ORF23	chromosome 12 open reading frame 23
C13ORF33	chromosome 13 open reading frame 33
C14ORF1	chromosome 14 open reading frame 1
C14ORF32	chromosome 14 open reading frame 32
C14ORF46	chromosome 14 open reading frame 46
C15ORF29	chromosome 15 open reading frame 29
C18ORF25	chromosome 18 open reading frame 25
C19ORF10	chromosome 19 open reading frame 10
C19ORF50	chromosome 19 open reading frame 50
C19ORF57	chromosome 19 open reading frame 57
C1D	-
C1ORF174	chromosome 1 open reading frame 174
C1ORF33	chromosome 1 open reading frame 33
C1ORF71	chromosome 1 open reading frame 71
C1QTNF1	C1q and tumor necrosis factor related protein 1
C20ORF24	chromosome 20 open reading frame 24
C2ORF30	chromosome 2 open reading frame 30
C2ORF47	chromosome 2 open reading frame 47
C6ORF125	chromosome 6 open reading frame 125
C7ORF20	chromosome 7 open reading frame 20
C8ORF30A	chromosome 8 open reading frame 30A
C9ORF25	chromosome 9 open reading frame 25
CA9	carbonic anhydrase IX
CAB39	calcium binding protein 39
CACYBP	calcyclin binding protein
CAND2	cullin-associated and neddylation-dissociated 2 (putative)
CBX1	chromobox homolog 1 (HP1 beta homolog Drosophila )
CBX5	chromobox homolog 5 (HP1 alpha homolog, Drosophila)
CBX8	chromobox homolog 8 (Pc class homolog, Drosophila)
CCAR1	cell division cycle and apoptosis regulator 1
CCDC101	coiled-coil domain containing 101
CCDC106	coiled-coil domain containing 106
CCDC58	coiled-coil domain containing 58
CCDC59	coiled-coil domain containing 59
CCDC85B	coiled-coil domain containing 85B
CCDC91	coiled-coil domain containing 91
CCDC92	coiled-coil domain containing 92
CCNB1	cyclin B1
CCNC	cyclin C
CCNDBP1	cyclin D-type binding-protein 1
CCNE1	cyclin E1
CCNL2	cyclin L2
CD1A	CD1a molecule
CD1B	CD1b molecule
CD1C	CD1c molecule
CD2BP2	CD2 (cytoplasmic tail) binding protein 2
CD8A	CD8a molecule
CD8B	CD8b molecule
CDAN1	congenital dyserythropoietic anemia, type I
CDC14B	CDC14 cell division cycle 14 homolog B (S. cerevisiae)
CDC2L1	cell division cycle 2-like 1 (PITSLRE proteins)
CDC2L6	cell division cycle 2-like 6 (CDK8-like)
CDC5L	CDC5 cell division cycle 5-like (S. pombe)
CDC73	cell division cycle 73, Paf1/RNA polymerase II complex component, homolog (S. cerevisiae)
CDH10	cadherin 10, type 2 (T2-cadherin)
CDH16	cadherin 16, KSP-cadherin
CDH17	cadherin 17, LI cadherin (liver-intestine)
CDH18	cadherin 18, type 2
CDH6	cadherin 6, type 2, K-cadherin (fetal kidney)
CDH7	cadherin 7, type 2
CDH8	cadherin 8, type 2
CDK8	cyclin-dependent kinase 8
CDON	Cdon homolog (mouse)
CEACAM5	carcinoembryonic antigen-related cell adhesion molecule 5
CEBPE	CCAAT/enhancer binding protein (C/EBP), epsilon
CEP70	centrosomal protein 70kDa
CEP72	centrosomal protein 72kDa
CHD8	chromodomain helicase DNA binding protein 8
CHD9	chromodomain helicase DNA binding protein 9
CHGB	chromogranin B (secretogranin 1)
CHIC2	cysteine-rich hydrophobic domain 2
CHMP4B	chromatin modifying protein 4B
CIR	-
CITED4	Cbp/p300-interacting transactivator, with Glu/Asp-rich carboxy-terminal domain, 4
CKMT1B	creatine kinase, mitochondrial 1B
CLPP	ClpP caseinolytic peptidase, ATP-dependent, proteolytic subunit homolog (E. coli)
CLSPN	claspin homolog (Xenopus laevis)
CNOT3	CCR4-NOT transcription complex, subunit 3
CNTN2	contactin 2 (axonal)
COIL	coilin
COPS6	COP9 constitutive photomorphogenic homolog subunit 6 (Arabidopsis)
COPS7A	COP9 constitutive photomorphogenic homolog subunit 7A (Arabidopsis)
COPS8	COP9 constitutive photomorphogenic homolog subunit 8 (Arabidopsis)
COQ6	coenzyme Q6 homolog, monooxygenase (S. cerevisiae)
COTL1	coactosin-like 1 (Dictyostelium)
COX4I1	cytochrome c oxidase subunit IV isoform 1
COX4I2	cytochrome c oxidase subunit IV isoform 2 (lung)
COX4NB	COX4 neighbor
COX5A	cytochrome c oxidase subunit Va
CPNE4	copine IV
CPSF2	cleavage and polyadenylation specific factor 2, 100kDa
CRELD1	cysteine-rich with EGF-like domains 1
CRI1	CREBBP/EP300 inhibitor 1
CROP	-
CRY2	cryptochrome 2 (photolyase-like)
CS	citrate synthase
CSRP2	cysteine and glycine-rich protein 2
CTBS	chitobiase, di-N-acetyl-
CTCFL	CCCTC-binding factor (zinc finger protein)-like
CTDSP2	CTD (carboxy-terminal domain, RNA polymerase II, polypeptide A) small phosphatase 2
CUEDC2	CUE domain containing 2
CUL4B	cullin 4B
CXADR	coxsackie virus and adenovirus receptor
CYB5A	cytochrome b5 type A (microsomal)
CYB5R1	cytochrome b5 reductase 1
CYC1	cytochrome c-1
DACH1	dachshund homolog 1 (Drosophila)
DAZAP2	DAZ associated protein 2
DCXR	dicarbonyl/L-xylulose reductase
DDC	dopa decarboxylase (aromatic L-amino acid decarboxylase)
DDOST	dolichyl-diphosphooligosaccharide-protein glycosyltransferase
DDT	D-dopachrome tautomerase
DDX21	DEAD (Asp-Glu-Ala-Asp) box polypeptide 21
DDX52	DEAD (Asp-Glu-Ala-Asp) box polypeptide 52
DHX30	DEAH (Asp-Glu-Ala-His) box polypeptide 30
DHX34	DEAH (Asp-Glu-Ala-His) box polypeptide 34
DLAT	dihydrolipoamide S-acetyltransferase (E2 component of pyruvate dehydrogenase complex)
DLEU1	deleted in lymphocytic leukemia, 1
DLX1	distal-less homeobox 1
DNM2	dynamin 2
DNMT3L	DNA (cytosine-5-)-methyltransferase 3-like
DNTTIP2	deoxynucleotidyltransferase, terminal, interacting protein 2
DPPA2	developmental pluripotency associated 2
DSC3	desmocollin 3
DTX3L	deltex 3-like (Drosophila)
DUPD1	dual specificity phosphatase and pro isomerase domain containing 1
DYDC2	DPY30 domain containing 2
DYNC1I2	dynein, cytoplasmic 1, intermediate chain 2
DYNLT3	dynein, light chain, Tctex-type 3
E2F4	E2F transcription factor 4, p107/p130-binding
E2F5	E2F transcription factor 5, p130-binding
EAF1	ELL associated factor 1
EBF3	early B-cell factor 3
EFCAB4B	EF-hand calcium binding domain 4B
EFEMP2	EGF-containing fibulin-like extracellular matrix protein 2
EGLN3	egl nine homolog 3 (C. elegans)
EIF2C2	eukaryotic translation initiation factor 2C, 2
EIF2C3	eukaryotic translation initiation factor 2C, 3
EIF2C4	eukaryotic translation initiation factor 2C, 4
EIF2S1	eukaryotic translation initiation factor 2, subunit 1 alpha, 35kDa
EIF4ENIF1	eukaryotic translation initiation factor 4E nuclear import factor 1
ELAVL3	ELAV (embryonic lethal, abnormal vision, Drosophila)-like 3 (Hu antigen C)
ELK4	ELK4, ETS-domain protein (SRF accessory protein 1)
EMB	embigin homolog (mouse)
EP400	E1A binding protein p400
EPC2	enhancer of polycomb homolog 2 (Drosophila)
ERAS	ES cell expressed Ras
ERVK6	endogenous retroviral sequence K, 6
ESD	esterase D/formylglutathione hydrolase
ESRRA	estrogen-related receptor alpha
ESRRB	estrogen-related receptor beta
ETFA	electron-transfer-flavoprotein, alpha polypeptide (glutaric aciduria II)
ETFB	electron-transfer-flavoprotein, beta polypeptide
ETV4	ets variant gene 4 (E1A enhancer binding protein, E1AF)
ETV5	ets variant gene 5 (ets-related molecule)
ETV6	ets variant gene 6 (TEL oncogene)
EVI1	ecotropic viral integration site 1
EWSR1	Ewing sarcoma breakpoint region 1
EXOC1	exocyst complex component 1
EXOC3	exocyst complex component 3
EXOC8	exocyst complex component 8
FAM100A	family with sequence similarity 100, member A
FAM101B	family with sequence similarity 101, member B
FAM120C	family with sequence similarity 120C
FAM98A	family with sequence similarity 98, member A
FANCD2	Fanconi anemia, complementation group D2
FATE1	fetal and adult testis expressed 1
FAU	Finkel-Biskis-Reilly murine sarcoma virus (FBR-MuSV) ubiquitously expressed (fox derived); ribosomal protein S30
FBXO34	F-box protein 34
FCHO1	FCH domain only 1
FDX1	ferredoxin 1
FHL1	four and a half LIM domains 1
FKBP2	FK506 binding protein 2, 13kDa
FLJ10324	-
FNBP1	formin binding protein 1
FOXA1	forkhead box A1
FOXA2	forkhead box A2
FOXA3	forkhead box A3
FTSJ1	FtsJ homolog 1 (E. coli)
FUS	fusion (involved in t(12;16) in malignant liposarcoma)
FXYD2	FXYD domain containing ion transport regulator 2
FXYD6	FXYD domain containing ion transport regulator 6
FXYD7	FXYD domain containing ion transport regulator 7
GABARAPL2	GABA(A) receptor-associated protein-like 2
GABPA	GA binding protein transcription factor, alpha subunit 60kDa
GANAB	glucosidase, alpha; neutral AB
GARS	glycyl-tRNA synthetase
GATA5	GATA binding protein 5
GATS	-
GBAS	glioblastoma amplified sequence
GCC1	GRIP and coiled-coil domain containing 1
GCDH	glutaryl-Coenzyme A dehydrogenase
GCN1L1	GCN1 general control of amino-acid synthesis 1-like 1 (yeast)
GFER	growth factor, augmenter of liver regeneration (ERV1 homolog, S. cerevisiae)
GFM1	G elongation factor, mitochondrial 1
GMEB1	glucocorticoid modulatory element binding protein 1
GMPPB	GDP-mannose pyrophosphorylase B
GOLGA2	golgi autoantigen, golgin subfamily a, 2
GPBP1	GC-rich promoter binding protein 1
GPBP1L1	GC-rich promoter binding protein 1-like 1
GPR135	G protein-coupled receptor 135
GPX7	glutathione peroxidase 7
GRINL1A	glutamate receptor, ionotropic, N-methyl D-aspartate-like 1A
GRIPAP1	GRIP1 associated protein 1
GSC	goosecoid
GSTK1	glutathione S-transferase kappa 1
GSTM4	glutathione S-transferase M4
GSTO1	glutathione S-transferase omega 1
GTF2A1	general transcription factor IIA, 1, 19/37kDa
GTF2A2	general transcription factor IIA, 2, 12kDa
GTF3C1	general transcription factor IIIC, polypeptide 1, alpha 220kDa
GTF3C3	general transcription factor IIIC, polypeptide 3, 102kDa
GTF3C5	general transcription factor IIIC, polypeptide 5, 63kDa
GYG1	glycogenin 1
H1F0	H1 histone family, member 0
H2AFZ	H2A histone family, member Z
HADHA	hydroxyacyl-Coenzyme A dehydrogenase/3-ketoacyl-Coenzyme A thiolase/enoyl-Coenzyme A hydratase (trifunctional protein), alpha subunit
HELB	helicase (DNA) B
HELZ	helicase with zinc finger
HERC1	hect (homologous to the E6-AP (UBE3A) carboxyl terminus) domain and RCC1 (CHC1)-like domain (RLD) 1
HIC2	hypermethylated in cancer 2
HIF3A	hypoxia inducible factor 3, alpha subunit
HIGD1A	HIG1 domain family, member 1A
HIST1H2AJ	histone cluster 1, H2aj
HIST1H2BA	histone cluster 1, H2ba
HIST1H2BL	histone cluster 1, H2bl
HIST2H2AC	histone cluster 2, H2ac
HIST2H2BE	histone cluster 2, H2be
HIST2H3C	histone cluster 2, H3c
HIST3H2A	histone cluster 3, H2a
HIST3H3	histone cluster 3, H3
HK2	hexokinase 2
HLA-A	major histocompatibility complex, class I, A
HLA-C	major histocompatibility complex, class I, C
HLA-DRA	major histocompatibility complex, class II, DR alpha
HLA-DRB1	major histocompatibility complex, class II, DR beta 1
HLA-E	major histocompatibility complex, class I, E
HLA-F	major histocompatibility complex, class I, F
HMG20B	high-mobility group 20B
HMGCS1	3-hydroxy-3-methylglutaryl-Coenzyme A synthase 1 (soluble)
HMOX2	heme oxygenase (decycling) 2
HOXA5	homeobox A5
HOXB3	homeobox B3
HOXB4	homeobox B4
HOXB6	homeobox B6
HOXB7	homeobox B7
HOXB8	homeobox B8
HOXB9	homeobox B9
HOXD10	homeobox D10
HOXD11	homeobox D11
HOXD3	homeobox D3
HOXD4	homeobox D4
HOXD8	homeobox D8
HOXD9	homeobox D9
HR	hairless homolog (mouse)
HSF1	heat shock transcription factor 1
HSP90AA2	heat shock protein 90kDa alpha (cytosolic), class A member 2
HSPA14	heat shock 70kDa protein 14
HSPC152	-
HTN1	histatin 1
HUS1B	HUS1 checkpoint homolog b (S. pombe)
IARS	isoleucine-tRNA synthetase
IDH3G	isocitrate dehydrogenase 3 (NAD+) gamma
IDI2	isopentenyl-diphosphate delta isomerase 2
IER3IP1	immediate early response 3 interacting protein 1
IFI27	interferon, alpha-inducible protein 27
IFIT1	interferon-induced protein with tetratricopeptide repeats 1
IFIT3	interferon-induced protein with tetratricopeptide repeats 3
IGSF21	immunoglobin superfamily, member 21
IL1F5	interleukin 1 family, member 5 (delta)
IMMT	inner membrane protein, mitochondrial (mitofilin)
ING3	inhibitor of growth family, member 3
INSM1	insulinoma-associated 1
IPO4	importin 4
IPO9	importin 9
IQCG	IQ motif containing G
IQGAP3	IQ motif containing GTPase activating protein 3
IQWD1	IQ motif and WD repeats 1
IRF5	interferon regulatory factor 5
ISL2	ISL2 transcription factor, LIM/homeodomain, (islet-2)
ITSN2	intersectin 2
JDP2	-
JPH1	junctophilin 1
KCNK18	potassium channel, subfamily K, member 18
KCTD17	potassium channel tetramerisation domain containing 17
KCTD5	potassium channel tetramerisation domain containing 5
KHDRBS2	KH domain containing, RNA binding, signal transduction associated 2
KIAA0090	KIAA0090
KIAA0774	KIAA0774
KIAA1267	KIAA1267
KIAA1549	-
KIAA1949	KIAA1949
KLF1	Kruppel-like factor 1 (erythroid)
KLF16	Kruppel-like factor 16
KLF6	Kruppel-like factor 6
KLHL12	kelch-like 12 (Drosophila)
KLHL13	kelch-like 13 (Drosophila)
KRTCAP2	keratinocyte associated protein 2
LAGE3	L antigen family, member 3
LARS	leucyl-tRNA synthetase
LASS2	LAG1 homolog, ceramide synthase 2 (S. cerevisiae)
LEF1	lymphoid enhancer-binding factor 1
LHX9	LIM homeobox 9
LIN9	lin-9 homolog (C. elegans)
LMTK3	lemur tyrosine kinase 3
LMX1A	LIM homeobox transcription factor 1, alpha
LOC56902	-
LOH3CR2A	loss of heterozygosity, 3, chromosomal region 2, gene A
LOXHD1	lipoxygenase homology domains 1
LRAT	lecithin retinol acyltransferase (phosphatidylcholine--retinol O-acyltransferase)
LSM12	LSM12 homolog (S. cerevisiae)
LSM8	LSM8 homolog, U6 small nuclear RNA associated (S. cerevisiae)
LYPLA1	lysophospholipase I
MACF1	microtubule-actin crosslinking factor 1
MAD1L1	MAD1 mitotic arrest deficient-like 1 (yeast)
MAD2L1BP	MAD2L1 binding protein
MAF1	MAF1 homolog (S. cerevisiae)
MAFG	v-maf musculoaponeurotic fibrosarcoma oncogene homolog G (avian)
MAFK	v-maf musculoaponeurotic fibrosarcoma oncogene homolog K (avian)
MAGEA1	melanoma antigen family A, 1 (directs expression of antigen MZ2-E)
MAGEA4	melanoma antigen family A, 4
MAGEA6	melanoma antigen family A, 6
MAGEB18	melanoma antigen family B, 18
MAGEB2	melanoma antigen family B, 2
MAGED2	melanoma antigen family D, 2
MAGI2	membrane associated guanylate kinase, WW and PDZ domain containing 2
MAP3K7IP3	mitogen-activated protein kinase kinase kinase 7 interacting protein 3
MARS	methionine-tRNA synthetase
MAT2A	methionine adenosyltransferase II, alpha
MBD3	methyl-CpG binding domain protein 3
MBD3L1	methyl-CpG binding domain protein 3-like 1
MCM10	MCM10 minichromosome maintenance deficient 10 (S. cerevisiae)
MDC1	mediator of DNA damage checkpoint 1
MDS1	myelodysplasia syndrome 1
MED10	mediator of RNA polymerase II transcription, subunit 10 homolog (NUT2, S. cerevisiae)
MED11	mediator of RNA polymerase II transcription, subunit 11 homolog (S. cerevisiae)
MED19	mediator of RNA polymerase II transcription, subunit 19 homolog (S. cerevisiae)
MED28	mediator of RNA polymerase II transcription, subunit 28 homolog (S. cerevisiae)
MED31	mediator of RNA polymerase II transcription, subunit 31 homolog (S. cerevisiae)
MED8	mediator of RNA polymerase II transcription, subunit 8 homolog (S. cerevisiae)
MED9	mediator of RNA polymerase II transcription, subunit 9 homolog (S. cerevisiae)
MEIS1	Meis1, myeloid ecotropic viral integration site 1 homolog (mouse)
MFN1	mitofusin 1
MGC16025	-
MITF	microphthalmia-associated transcription factor
MKL1	megakaryoblastic leukemia (translocation) 1
MLL3	myeloid/lymphoid or mixed-lineage leukemia 3
MLLT10	myeloid/lymphoid or mixed-lineage leukemia (trithorax homolog, Drosophila); translocated to, 10
MN1	meningioma (disrupted in balanced translocation) 1
MNS1	meiosis-specific nuclear structural 1
MORF4L1	mortality factor 4 like 1
MORF4L2	mortality factor 4 like 2
MRP63	mitochondrial ribosomal protein 63
MRPL13	mitochondrial ribosomal protein L13
MRPL14	mitochondrial ribosomal protein L14
MRPL4	mitochondrial ribosomal protein L4
MRPS14	mitochondrial ribosomal protein S14
MRPS18B	mitochondrial ribosomal protein S18B
MRPS34	mitochondrial ribosomal protein S34
MT-CO2	mitochondrially encoded cytochrome c oxidase II
MTMR6	myotubularin related protein 6
MTPN	myotrophin
MYB	v-myb myeloblastosis viral oncogene homolog (avian)
MYBL1	v-myb myeloblastosis viral oncogene homolog (avian)-like 1
MYBL2	v-myb myeloblastosis viral oncogene homolog (avian)-like 2
MYH8	myosin, heavy chain 8, skeletal muscle, perinatal
MYL1	myosin, light chain 1, alkali; skeletal, fast
MYLPF	-
MYO1D	myosin ID
MYO5B	myosin VB
MYOG	myogenin (myogenic factor 4)
N4BP2	-
N4BP3	-
NARS	asparaginyl-tRNA synthetase
NAT5	N-acetyltransferase 5
NAV2	neuron navigator 2
NBPF3	neuroblastoma breakpoint family, member 3
NCAPG	non-SMC condensin I complex, subunit G
NCOA1	nuclear receptor coactivator 1
NCOA2	nuclear receptor coactivator 2
NCOA3	nuclear receptor coactivator 3
NCOR2	nuclear receptor co-repressor 2
NDNL2	necdin-like 2
NDUFA4	NADH dehydrogenase (ubiquinone) 1 alpha subcomplex, 4, 9kDa
NDUFA5	NADH dehydrogenase (ubiquinone) 1 alpha subcomplex, 5, 13kDa
NDUFA8	NADH dehydrogenase (ubiquinone) 1 alpha subcomplex, 8, 19kDa
NDUFB1	NADH dehydrogenase (ubiquinone) 1 beta subcomplex, 1, 7kDa
NDUFV1	NADH dehydrogenase (ubiquinone) flavoprotein 1, 51kDa
NEDD1	neural precursor cell expressed, developmentally down-regulated 1
NEDD4	neural precursor cell expressed, developmentally down-regulated 4
NEURL2	neuralized homolog 2 (Drosophila)
NEUROD1	neurogenic differentiation 1
NFIA	nuclear factor I/A
NHP2L1	NHP2 non-histone chromosome protein 2-like 1 (S. cerevisiae)
NIF3L1	NIF3 NGG1 interacting factor 3-like 1 (S. pombe)
NLE1	notchless homolog 1 (Drosophila)
NOC4L	nucleolar complex associated 4 homolog (S. cerevisiae)
NOMO1	NODAL modulator 1
NP	nucleoside phosphorylase
NPAT	nuclear protein, ataxia-telangiectasia locus
NPEPPS	aminopeptidase puromycin sensitive
NR1D1	nuclear receptor subfamily 1, group D, member 1
NR1H3	nuclear receptor subfamily 1, group H, member 3
NR2C1	nuclear receptor subfamily 2, group C, member 1
NR4A2	nuclear receptor subfamily 4, group A, member 2
NRAS	neuroblastoma RAS viral (v-ras) oncogene homolog
NRIP2	nuclear receptor interacting protein 2
NSFL1C	NSFL1 (p97) cofactor (p47)
NUDT11	nudix (nucleoside diphosphate linked moiety X)-type motif 11
NUP153	nucleoporin 153kDa
NUP155	nucleoporin 155kDa
NUTF2	nuclear transport factor 2
OBFC1	oligonucleotide/oligosaccharide-binding fold containing 1
OGFOD2	2-oxoglutarate and iron-dependent oxygenase domain containing 2
OLIG2	oligodendrocyte lineage transcription factor 2
ONECUT1	one cut domain, family member 1
OR4C12	olfactory receptor, family 4, subfamily C, member 12
OR5H6	olfactory receptor, family 5, subfamily H, member 6
OS9	-
P4HA1	procollagen-proline, 2-oxoglutarate 4-dioxygenase (proline 4-hydroxylase), alpha polypeptide I
PAFAH1B2	platelet-activating factor acetylhydrolase, isoform Ib, beta subunit 30kDa
PAK6	p21(CDKN1A)-activated kinase 6
PANX3	pannexin 3
PAQR3	progestin and adipoQ receptor family member III
PB1	-
PBX2	pre-B-cell leukemia transcription factor 2
PCBD1	pterin-4 alpha-carbinolamine dehydratase/dimerization cofactor of hepatocyte nuclear factor 1 alpha (TCF1)
PCBP1	poly(rC) binding protein 1
PCBP2	poly(rC) binding protein 2
PCDH7	BH-protocadherin (brain-heart)
PCDH9	protocadherin 9
PDHA2	pyruvate dehydrogenase (lipoamide) alpha 2
PDHX	pyruvate dehydrogenase complex, component X
PDXK	pyridoxal (pyridoxine, vitamin B6) kinase
PDZK1IP1	PDZK1 interacting protein 1
PEBP4	-
PECR	peroxisomal trans-2-enoyl-CoA reductase
PELI1	pellino homolog 1 (Drosophila)
PELI3	pellino homolog 3 (Drosophila)
PFAS	phosphoribosylformylglycinamidine synthase (FGAR amidotransferase)
PFKP	phosphofructokinase, platelet
PFN2	profilin 2
PGRMC1	progesterone receptor membrane component 1
PGRMC2	progesterone receptor membrane component 2
PHACTR3	phosphatase and actin regulator 3
PHACTR4	phosphatase and actin regulator 4
PHB2	prohibitin 2
PHF8	PHD finger protein 8
PHOX2A	paired-like (aristaless) homeobox 2a
PHPT1	phosphohistidine phosphatase 1
PHYHIP	phytanoyl-CoA 2-hydroxylase interacting protein
PIAS2	protein inhibitor of activated STAT, 2
PINX1	-
PITPNB	phosphatidylinositol transfer protein, beta
PIWIL1	piwi-like 1 (Drosophila)
PIWIL2	piwi-like 2 (Drosophila)
PIWIL4	piwi-like 4 (Drosophila)
PJA1	praja 1
PJA2	praja 2, RING-H2 motif containing
PKNOX1	PBX/knotted 1 homeobox 1
PKNOX2	PBX/knotted 1 homeobox 2
PLEKHA4	pleckstrin homology domain containing, family A (phosphoinositide binding specific) member 4
PLEKHA5	pleckstrin homology domain containing, family A member 5
PLRG1	pleiotropic regulator 1 (PRL1 homolog, Arabidopsis)
PNN	pinin, desmosome associated protein
PNPT1	polyribonucleotide nucleotidyltransferase 1
PNRC1	proline-rich nuclear receptor coactivator 1
PNRC2	proline-rich nuclear receptor coactivator 2
POLA2	polymerase (DNA directed), alpha 2 (70kD subunit)
POLR2A	polymerase (RNA) II (DNA directed) polypeptide A, 220kDa
POLR3A	polymerase (RNA) III (DNA directed) polypeptide A, 155kDa
POLR3F	polymerase (RNA) III (DNA directed) polypeptide F, 39 kDa
POM121	POM121 membrane glycoprotein (rat)
POU3F1	POU domain, class 3, transcription factor 1
PPA1	pyrophosphatase (inorganic) 1
PPAP2C	phosphatidic acid phosphatase type 2C
PPIB	peptidylprolyl isomerase B (cyclophilin B)
PPID	peptidylprolyl isomerase D (cyclophilin D)
PPIL1	peptidylprolyl isomerase (cyclophilin)-like 1
PPP1CC	protein phosphatase 1, catalytic subunit, gamma isoform
PPP1R11	protein phosphatase 1, regulatory (inhibitor) subunit 11
PPP1R13L	protein phosphatase 1, regulatory (inhibitor) subunit 13 like
PPP1R9A	protein phosphatase 1, regulatory (inhibitor) subunit 9A
PPRC1	peroxisome proliferative activated receptor, gamma, coactivator-related 1
PRDM2	PR domain containing 2, with ZNF domain
PRIC285	-
PRKAR1B	protein kinase, cAMP-dependent, regulatory, type I, beta
PRKCSH	protein kinase C substrate 80K-H
PRPF19	PRP19/PSO4 pre-mRNA processing factor 19 homolog (S. cerevisiae)
PRPF38A	PRP38 pre-mRNA processing factor 38 (yeast) domain containing A
PRPF4	PRP4 pre-mRNA processing factor 4 homolog (yeast)
PRPF40A	PRP40 pre-mRNA processing factor 40 homolog A (yeast)
PRRG2	proline rich Gla (G-carboxyglutamic acid) 2
PRTFDC1	phosphoribosyl transferase domain containing 1
PSIP1	PC4 and SFRS1 interacting protein 1
PSMA1	proteasome (prosome, macropain) subunit, alpha type, 1
PSMA2	proteasome (prosome, macropain) subunit, alpha type, 2
PSMA3	proteasome (prosome, macropain) subunit, alpha type, 3
PSMA4	proteasome (prosome, macropain) subunit, alpha type, 4
PSMA6	proteasome (prosome, macropain) subunit, alpha type, 6
PSMA7	proteasome (prosome, macropain) subunit, alpha type, 7
PSMB1	proteasome (prosome, macropain) subunit, beta type, 1
PSMB2	proteasome (prosome, macropain) subunit, beta type, 2
PSMB3	proteasome (prosome, macropain) subunit, beta type, 3
PSMB4	proteasome (prosome, macropain) subunit, beta type, 4
PSMB6	proteasome (prosome, macropain) subunit, beta type, 6
PSMB7	proteasome (prosome, macropain) subunit, beta type, 7
PSMB8	proteasome (prosome, macropain) subunit, beta type, 8 (large multifunctional peptidase 7)
PSMB9	proteasome (prosome, macropain) subunit, beta type, 9 (large multifunctional peptidase 2)
PSMC1	proteasome (prosome, macropain) 26S subunit, ATPase, 1
PSMC2	proteasome (prosome, macropain) 26S subunit, ATPase, 2
PSMC3	proteasome (prosome, macropain) 26S subunit, ATPase, 3
PSMC3IP	PSMC3 interacting protein
PSMC6	proteasome (prosome, macropain) 26S subunit, ATPase, 6
PSMD10	proteasome (prosome, macropain) 26S subunit, non-ATPase, 10
PSMD11	proteasome (prosome, macropain) 26S subunit, non-ATPase, 11
PSMD12	proteasome (prosome, macropain) 26S subunit, non-ATPase, 12
PSMD3	proteasome (prosome, macropain) 26S subunit, non-ATPase, 3
PSMD4	proteasome (prosome, macropain) 26S subunit, non-ATPase, 4
PSMD5	proteasome (prosome, macropain) 26S subunit, non-ATPase, 5
PSMD6	proteasome (prosome, macropain) 26S subunit, non-ATPase, 6
PSMD7	proteasome (prosome, macropain) 26S subunit, non-ATPase, 7 (Mov34 homolog)
PSMD8	proteasome (prosome, macropain) 26S subunit, non-ATPase, 8
PSME3	proteasome (prosome, macropain) activator subunit 3 (PA28 gamma; Ki)
PSME4	proteasome (prosome, macropain) activator subunit 4
PTBP2	polypyrimidine tract binding protein 2
PTGES2	prostaglandin E synthase 2
PTP4A3	protein tyrosine phosphatase type IVA, member 3
PTRH2	peptidyl-tRNA hydrolase 2
PYGO1	pygopus homolog 1 (Drosophila)
PYGO2	pygopus homolog 2 (Drosophila)
QARS	glutaminyl-tRNA synthetase
RAB11B	RAB11B, member RAS oncogene family
RAB27A	RAB27A, member RAS oncogene family
RAB2B	RAB2B, member RAS oncogene family
RAB34	RAB34, member RAS oncogene family
RAB37	RAB37, member RAS oncogene family
RAB38	RAB38, member RAS oncogene family
RAB5C	RAB5C, member RAS oncogene family
RAB6A	RAB6A, member RAS oncogene family
RAB8A	RAB8A, member RAS oncogene family
RAD9B	RAD9 homolog B (S. cerevisiae)
RAPGEF2	Rap guanine nucleotide exchange factor (GEF) 2
RARA	retinoic acid receptor, alpha
RASD2	RASD family, member 2
RASL11B	RAS-like, family 11, member B
RASL12	RAS-like, family 12
RASSF4	Ras association (RalGDS/AF-6) domain family 4
RBBP5	retinoblastoma binding protein 5
RBM8A	RNA binding motif protein 8A
RBP1	retinol binding protein 1, cellular
RBX1	ring-box 1
RCHY1	ring finger and CHY zinc finger domain containing 1
RCOR1	REST corepressor 1
RDBP	RD RNA binding protein
REXO4	REX4, RNA exonuclease 4 homolog (S. cerevisiae)
RFC2	replication factor C (activator 1) 2, 40kDa
RFC5	replication factor C (activator 1) 5, 36.5kDa
RFWD2	ring finger and WD repeat domain 2
RFX2	regulatory factor X, 2 (influences HLA class II expression)
RFX4	regulatory factor X, 4 (influences HLA class II expression)
RFXANK	regulatory factor X-associated ankyrin-containing protein
RFXAP	regulatory factor X-associated protein
RGL2	ral guanine nucleotide dissociation stimulator-like 2
RGS10	regulator of G-protein signalling 10
RHEBL1	Ras homolog enriched in brain like 1
RIBC2	RIB43A domain with coiled-coils 2
RNF111	ring finger protein 111
RNF128	ring finger protein 128
RNF183	ring finger protein 183
RNF19	ring finger protein 19
RNF25	ring finger protein 25
RNF43	ring finger protein 43
RNF8	ring finger protein 8
RNMTL1	RNA methyltransferase like 1
RORA	RAR-related orphan receptor A
RPL32	ribosomal protein L32
RPP30	ribonuclease P/MRP 30kDa subunit
RPS21	ribosomal protein S21
RPS29	ribosomal protein S29
RRAS2	related RAS viral (r-ras) oncogene homolog 2
RRM1	ribonucleotide reductase M1 polypeptide
RRM2	ribonucleotide reductase M2 polypeptide
RRM2B	ribonucleotide reductase M2 B (TP53 inducible)
RSBN1	round spermatid basic protein 1
RSL1D1	ribosomal L1 domain containing 1
RTCD1	RNA terminal phosphate cyclase domain 1
RTDR1	rhabdoid tumor deletion region gene 1
RWDD3	RWD domain containing 3
RXRB	retinoid X receptor, beta
RXRG	retinoid X receptor, gamma
SAP30	Sin3A-associated protein, 30kDa
SART3	squamous cell carcinoma antigen recognised by T cells 3
SAT1	spermidine/spermine N1-acetyltransferase 1
SATB2	SATB family member 2
SBDS	Shwachman-Bodian-Diamond syndrome
SDSL	serine dehydratase-like
SEC61A1	Sec61 alpha 1 subunit (S. cerevisiae)
SELENBP1	selenium binding protein 1
SENP3	SUMO1/sentrin/SMT3 specific peptidase 3
2012-09-02	septin 2
2012-09-08	septin 8
SERINC3	serine incorporator 3
SERPINA7	serpin peptidase inhibitor, clade A (alpha-1 antiproteinase, antitrypsin), member 7
SETBP1	SET binding protein 1
SETD1A	SET domain containing 1A
SETDB1	SET domain, bifurcated 1
SFI1	Sfi1 homolog, spindle assembly associated (yeast)
SFRS3	splicing factor, arginine/serine-rich 3
SFXN1	sideroflexin 1
SFXN4	sideroflexin 4
SGTA	small glutamine-rich tetratricopeptide repeat (TPR)-containing, alpha
SHD	Src homology 2 domain containing transforming protein D
SIAHBP1	-
SIN3B	SIN3 homolog B, transcription regulator (yeast)
SIX5	sine oculis homeobox homolog 5 (Drosophila)
SKI	v-ski sarcoma viral oncogene homolog (avian)
SLC12A3	solute carrier family 12 (sodium/chloride transporters), member 3
SMAD6	SMAD, mothers against DPP homolog 6 (Drosophila)
SMAD9	SMAD, mothers against DPP homolog 9 (Drosophila)
SMARCA4	SWI/SNF related, matrix associated, actin dependent regulator of chromatin, subfamily a, member 4
SMN1	survival of motor neuron 1, telomeric
SMO	smoothened homolog (Drosophila)
SMYD2	SET and MYND domain containing 2
SMYD3	SET and MYND domain containing 3
SNAPC1	small nuclear RNA activating complex, polypeptide 1, 43kDa
SNIP1	Smad nuclear interacting protein 1
SOX1	SRY (sex determining region Y)-box 1
SOX17	SRY (sex determining region Y)-box 17
SOX2	SRY (sex determining region Y)-box 2
SOX4	SRY (sex determining region Y)-box 4
SOX6	SRY (sex determining region Y)-box 6
SOX9	SRY (sex determining region Y)-box 9 (campomelic dysplasia, autosomal sex-reversal)
SPPL2A	-
SPRY4	sprouty homolog 4 (Drosophila)
SPTLC2	serine palmitoyltransferase, long chain base subunit 2
SR140	-
SRGAP3	SLIT-ROBO Rho GTPase activating protein 3
SRM	spermidine synthase
SRPRB	signal recognition particle receptor, B subunit
SRY	sex determining region Y
SS18	synovial sarcoma translocation, chromosome 18
SS18L1	synovial sarcoma translocation gene on chromosome 18-like 1
SSBP2	single-stranded DNA binding protein 2
SSX1	synovial sarcoma, X breakpoint 1
STAMBPL1	STAM binding protein-like 1
STK35	serine/threonine kinase 35
STK40	serine/threonine kinase 40
STRA13	stimulated by retinoic acid 13 homolog (mouse)
SUCLG1	succinate-CoA ligase, GDP-forming, alpha subunit
SULT1E1	sulfotransferase family 1E, estrogen-preferring, member 1
SUMO2	SMT3 suppressor of mif two 3 homolog 2 (S. cerevisiae)
SUMO3	SMT3 suppressor of mif two 3 homolog 3 (S. cerevisiae)
SUV39H1	suppressor of variegation 3-9 homolog 1 (Drosophila)
SUZ12	suppressor of zeste 12 homolog (Drosophila)
TACC2	transforming, acidic coiled-coil containing protein 2
TADA2L	transcriptional adaptor 2 (ADA2 homolog, yeast)-like
TADA3L	transcriptional adaptor 3 (NGG1 homolog, yeast)-like
TAF10	TAF10 RNA polymerase II, TATA box binding protein (TBP)-associated factor, 30kDa
TAF11	TAF11 RNA polymerase II, TATA box binding protein (TBP)-associated factor, 28kDa
TAF12	TAF12 RNA polymerase II, TATA box binding protein (TBP)-associated factor, 20kDa
TAF13	TAF13 RNA polymerase II, TATA box binding protein (TBP)-associated factor, 18kDa
TAF15	TAF15 RNA polymerase II, TATA box binding protein (TBP)-associated factor, 68kDa
TAF4	TAF4 RNA polymerase II, TATA box binding protein (TBP)-associated factor, 135kDa
TAF4B	TAF4b RNA polymerase II, TATA box binding protein (TBP)-associated factor, 105kDa
TAF6	TAF6 RNA polymerase II, TATA box binding protein (TBP)-associated factor, 80kDa
TAF7	TAF7 RNA polymerase II, TATA box binding protein (TBP)-associated factor, 55kDa
TAF7L	TAF7-like RNA polymerase II, TATA box binding protein (TBP)-associated factor, 50kDa
TAGLN2	transgelin 2
TAP1	transporter 1, ATP-binding cassette, sub-family B (MDR/TAP)
TARS	threonyl-tRNA synthetase
TARSL2	threonyl-tRNA synthetase-like 2
TASP1	taspase, threonine aspartase, 1
TAT	tyrosine aminotransferase
TBL1XR1	transducin (beta)-like 1X-linked receptor 1
TBPL1	TBP-like 1
TCEA1	transcription elongation factor A (SII), 1
TCF20	transcription factor 20 (AR1)
TCF7L1	transcription factor 7-like 1 (T-cell specific, HMG-box)
TEAD1	TEA domain family member 1 (SV40 transcriptional enhancer factor)
TEAD2	TEA domain family member 2
TERF1	telomeric repeat binding factor (NIMA-interacting) 1
TEX11	testis expressed sequence 11
TFDP2	transcription factor Dp-2 (E2F dimerization partner 2)
TFE3	transcription factor binding to IGHM enhancer 3
TFRC	transferrin receptor (p90, CD71)
TGIF2	TGFB-induced factor 2 (TALE family homeobox)
TH1L	TH1-like (Drosophila)
THAP1	THAP domain containing, apoptosis associated protein 1
THAP11	THAP domain containing 11
THOC7	THO complex 7 homolog (Drosophila)
THRB	thyroid hormone receptor, beta (erythroblastic leukemia viral (v-erb-a) oncogene homolog 2, avian)
TIFA	-
TIMP2	TIMP metallopeptidase inhibitor 2
TJP2	tight junction protein 2 (zona occludens 2)
TKT	transketolase (Wernicke-Korsakoff syndrome)
TLE4	transducin-like enhancer of split 4 (E(sp1) homolog, Drosophila)
TMBIM4	transmembrane BAX inhibitor motif containing 4
TMCO1	transmembrane and coiled-coil domains 1
TMEM113	transmembrane protein 113
TMEM33	transmembrane protein 33
TMEM4	transmembrane protein 4
TMEM62	transmembrane protein 62
TOP2B	topoisomerase (DNA) II beta 180kDa
TOR1AIP2	torsin A interacting protein 2
TP53BP1	tumor protein p53 binding protein, 1
TP53INP1	tumor protein p53 inducible nuclear protein 1
TPD52L2	tumor protein D52-like 2
TRAF3IP3	TRAF3 interacting protein 3
TRAFD1	TRAF-type zinc finger domain containing 1
TRAM2	translocation associated membrane protein 2
TRIM21	tripartite motif-containing 21
TRIM33	tripartite motif-containing 33
TRIM59	tripartite motif-containing 59
TRIM63	tripartite motif-containing 63
TRIM69	tripartite motif-containing 69
TSEN54	tRNA splicing endonuclease 54 homolog (S. cerevisiae)
TSNAX	translin-associated factor X
TSR1	TSR1, 20S rRNA accumulation, homolog (S. cerevisiae)
TSSK1	testis-specific serine kinase 1
TTF1	transcription termination factor, RNA polymerase I
TTLL12	tubulin tyrosine ligase-like family, member 12
TXNL5	thioredoxin-like 5
TXNRD1	thioredoxin reductase 1
U2AF2	U2 small nuclear RNA auxiliary factor 2
UBE2M	ubiquitin-conjugating enzyme E2M (UBC12 homolog, yeast)
UBE2Q1	ubiquitin-conjugating enzyme E2Q (putative) 1
UBE2Z	ubiquitin-conjugating enzyme E2Z (putative)
UBQLN2	ubiquilin 2
UCK2	uridine-cytidine kinase 2
UGCGL1	UDP-glucose ceramide glucosyltransferase-like 1
UNC5A	unc-5 homolog A (C. elegans)
USF2	upstream transcription factor 2, c-fos interacting
USMG5	upregulated during skeletal muscle growth 5 homolog (mouse)
USP15	ubiquitin specific peptidase 15
USP4	ubiquitin specific peptidase 4 (proto-oncogene)
USP49	ubiquitin specific peptidase 49
USP5	ubiquitin specific peptidase 5 (isopeptidase T)
VARS	valyl-tRNA synthetase
VEZT	vezatin, adherens junctions transmembrane protein
VHLL	von Hippel-Lindau tumor suppressor-like
VPS28	vacuolar protein sorting 28 homolog (S. cerevisiae)
VPS37D	vacuolar protein sorting 37 homolog D (S. cerevisiae)
WBP11	WW domain binding protein 11
WDR25	WD repeat domain 25
WDR33	WD repeat domain 33
WDR37	WD repeat domain 37
WDR5	WD repeat domain 5
WDR51B	WD repeat domain 51B
WDR57	WD repeat domain 57 (U5 snRNP specific)
WDR5B	WD repeat domain 5B
WDR61	WD repeat domain 61
WDR76	WD repeat domain 76
WDR8	WD repeat domain 8
WNT16	wingless-type MMTV integration site family, member 16
WRB	tryptophan rich basic protein
WT1	Wilms tumor 1
XPOT	exportin, tRNA (nuclear export receptor for tRNAs)
XRCC1	X-ray repair complementing defective repair in Chinese hamster cells 1
YAP1	Yes-associated protein 1, 65kDa
YEATS4	YEATS domain containing 4
YY1AP1	YY1 associated protein 1
ZBTB2	zinc finger and BTB domain containing 2
ZBTB6	zinc finger and BTB domain containing 6
ZBTB7A	zinc finger and BTB domain containing 7A
ZC3HAV1	zinc finger CCCH-type, antiviral 1
ZCCHC10	zinc finger, CCHC domain containing 10
ZDHHC3	zinc finger, DHHC-type containing 3
ZDHHC4	zinc finger, DHHC-type containing 4
ZG16	-
ZNF121	zinc finger protein 121
ZNF165	zinc finger protein 165
ZNF208	zinc finger protein 208
ZNF217	zinc finger protein 217
ZNF317	zinc finger protein 317
ZNF335	zinc finger protein 335
ZNF362	zinc finger protein 362
ZNF451	zinc finger protein 451
ZNF521	zinc finger protein 521
ZNF592	zinc finger protein 592
ZNF639	zinc finger protein 639
ZNF646	zinc finger protein 646
ZNF652	zinc finger protein 652
ZNF653	zinc finger protein 653
ZNF687	zinc finger protein 687
ZNF8	zinc finger protein 8
ZNHIT1	zinc finger, HIT type 1
ZRANB1	zinc finger, RAN-binding domain containing 1
ZRSR2	zinc finger (CCCH type), RNA-binding motif and serine/arginine rich 2
ZYG11B	zyg-11 homolog B (C. elegans)

## Sheet: Second_Module_GSEA
Overlap Results
Collection(s):	BP
# overlaps shown:	10
# genesets in collections:	825
# genes in comparison (n):	1427
# genes in collections (N):	6032
Gene Set Name	# Genes in Gene Set (K)	Description	# Genes in Overlap (k)	k/K	p value
PROTEIN_AMINO_ACID_PHOSPHORYLATION	267	Genes annotated by the GO term GO:0006468. The process of introducing a phosphate group on to a protein.	122	0.4569	5.55e-16
PHOSPHORYLATION	298	Genes annotated by the GO term GO:0016310. The process of introducing a phosphate group into a molecule, usually with the formation of a phosphoric ester, a phosphoric anhydride or a phosphoric amide.	130	0.4362	5.11e-15
TRANSMEMBRANE_RECEPTOR_PROTEIN_TYROSINE_KINASE_SIGNALING_PATHWAY	82	Genes annotated by the GO term GO:0007169. The series of molecular signals generated as a consequence of a transmembrane receptor tyrosine kinase binding to its physiological ligand.	50	0.6098	4.23e-13
ENZYME_LINKED_RECEPTOR_PROTEIN_SIGNALING_PATHWAY	139	Genes annotated by the GO term GO:0007167. Any series of molecular signals initiated by the binding of an extracellular ligand to a receptor on the surface of the target cell, where the receptor possesses catalytic activity or is closely associated with an enzyme such as a protein kinase.	63	0.4532	1.18e-08
POST_TRANSLATIONAL_PROTEIN_MODIFICATION	462	Genes annotated by the GO term GO:0043687. The covalent alteration of one or more amino acids occurring in a protein after the protein has been completely translated and released from the ribosome.	156	0.3377	1.9e-07
EPIDERMAL_GROWTH_FACTOR_RECEPTOR_SIGNALING_PATHWAY	22	Genes annotated by the GO term GO:0007173. The series of molecular signals generated as a consequence of an epidermal growth factor receptor binding to one of its physiological ligands.	16	0.7273	1.51e-06
INSULIN_RECEPTOR_SIGNALING_PATHWAY	18	Genes annotated by the GO term GO:0008286. The series of molecular signals generated as a consequence of the insulin receptor binding to insulin.	12	0.6667	0.000128
PROTEIN_AMINO_ACID_AUTOPHOSPHORYLATION	30	Genes annotated by the GO term GO:0046777. The phosphorylation by a protein of one or more of its own amino acid residues, or residues on an identical protein.	16	0.5333	0.000409
PROTEIN_AMINO_ACID_DEPHOSPHORYLATION	63	Genes annotated by the GO term GO:0006470. The process of removing one or more phosphoric residues from a protein.	27	0.4286	0.00056
MAPKKK_CASCADE_GO_0000165	102	Genes annotated by the GO term GO:0000165. Cascade of at least three protein kinase activities culminating in the phosphorylation and activation of a MAP kinase. MAPKKK cascades lie downstream of numerous signaling pathways.	39	0.3824	0.000642
Gene/Gene Set Overlap Matrix
Gene Symbol	Description	PROTEIN_AMINO_ACID_PHOSPHORYLATION	PHOSPHORYLATION	TRANSMEMBRANE_RECEPTOR_PROTEIN_TYROSINE_KINASE_SIGNALING_PATHWAY	ENZYME_LINKED_RECEPTOR_PROTEIN_SIGNALING_PATHWAY	POST_TRANSLATIONAL_PROTEIN_MODIFICATION	EPIDERMAL_GROWTH_FACTOR_RECEPTOR_SIGNALING_PATHWAY	INSULIN_RECEPTOR_SIGNALING_PATHWAY	PROTEIN_AMINO_ACID_AUTOPHOSPHORYLATION	PROTEIN_AMINO_ACID_DEPHOSPHORYLATION	MAPKKK_CASCADE_GO_0000165
RPS6KA5	ribosomal protein S6 kinase, 90kDa, polypeptide 5	PROTEIN_AMINO_ACID_PHOSPHORYLATION	PHOSPHORYLATION	TRANSMEMBRANE_RECEPTOR_PROTEIN_TYROSINE_KINASE_SIGNALING_PATHWAY	ENZYME_LINKED_RECEPTOR_PROTEIN_SIGNALING_PATHWAY	POST_TRANSLATIONAL_PROTEIN_MODIFICATION	EPIDERMAL_GROWTH_FACTOR_RECEPTOR_SIGNALING_PATHWAY
EGFR	epidermal growth factor receptor (erythroblastic leukemia viral (v-erb-b) oncogene homolog, avian)	PROTEIN_AMINO_ACID_PHOSPHORYLATION	PHOSPHORYLATION	TRANSMEMBRANE_RECEPTOR_PROTEIN_TYROSINE_KINASE_SIGNALING_PATHWAY	ENZYME_LINKED_RECEPTOR_PROTEIN_SIGNALING_PATHWAY	POST_TRANSLATIONAL_PROTEIN_MODIFICATION	EPIDERMAL_GROWTH_FACTOR_RECEPTOR_SIGNALING_PATHWAY
CBLC	Cas-Br-M (murine) ecotropic retroviral transforming sequence c	PROTEIN_AMINO_ACID_PHOSPHORYLATION	PHOSPHORYLATION	TRANSMEMBRANE_RECEPTOR_PROTEIN_TYROSINE_KINASE_SIGNALING_PATHWAY	ENZYME_LINKED_RECEPTOR_PROTEIN_SIGNALING_PATHWAY	POST_TRANSLATIONAL_PROTEIN_MODIFICATION	EPIDERMAL_GROWTH_FACTOR_RECEPTOR_SIGNALING_PATHWAY
AKT1	v-akt murine thymoma viral oncogene homolog 1	PROTEIN_AMINO_ACID_PHOSPHORYLATION	PHOSPHORYLATION	TRANSMEMBRANE_RECEPTOR_PROTEIN_TYROSINE_KINASE_SIGNALING_PATHWAY	ENZYME_LINKED_RECEPTOR_PROTEIN_SIGNALING_PATHWAY	POST_TRANSLATIONAL_PROTEIN_MODIFICATION		INSULIN_RECEPTOR_SIGNALING_PATHWAY	PROTEIN_AMINO_ACID_AUTOPHOSPHORYLATION
IGF1R	insulin-like growth factor 1 receptor	PROTEIN_AMINO_ACID_PHOSPHORYLATION	PHOSPHORYLATION	TRANSMEMBRANE_RECEPTOR_PROTEIN_TYROSINE_KINASE_SIGNALING_PATHWAY	ENZYME_LINKED_RECEPTOR_PROTEIN_SIGNALING_PATHWAY	POST_TRANSLATIONAL_PROTEIN_MODIFICATION		INSULIN_RECEPTOR_SIGNALING_PATHWAY	PROTEIN_AMINO_ACID_AUTOPHOSPHORYLATION
INSR	insulin receptor	PROTEIN_AMINO_ACID_PHOSPHORYLATION	PHOSPHORYLATION	TRANSMEMBRANE_RECEPTOR_PROTEIN_TYROSINE_KINASE_SIGNALING_PATHWAY	ENZYME_LINKED_RECEPTOR_PROTEIN_SIGNALING_PATHWAY	POST_TRANSLATIONAL_PROTEIN_MODIFICATION		INSULIN_RECEPTOR_SIGNALING_PATHWAY	PROTEIN_AMINO_ACID_AUTOPHOSPHORYLATION
SOCS1	suppressor of cytokine signaling 1	PROTEIN_AMINO_ACID_PHOSPHORYLATION	PHOSPHORYLATION	TRANSMEMBRANE_RECEPTOR_PROTEIN_TYROSINE_KINASE_SIGNALING_PATHWAY	ENZYME_LINKED_RECEPTOR_PROTEIN_SIGNALING_PATHWAY	POST_TRANSLATIONAL_PROTEIN_MODIFICATION		INSULIN_RECEPTOR_SIGNALING_PATHWAY
PDPK1	3-phosphoinositide dependent protein kinase-1	PROTEIN_AMINO_ACID_PHOSPHORYLATION	PHOSPHORYLATION	TRANSMEMBRANE_RECEPTOR_PROTEIN_TYROSINE_KINASE_SIGNALING_PATHWAY	ENZYME_LINKED_RECEPTOR_PROTEIN_SIGNALING_PATHWAY	POST_TRANSLATIONAL_PROTEIN_MODIFICATION		INSULIN_RECEPTOR_SIGNALING_PATHWAY
ERBB2	v-erb-b2 erythroblastic leukemia viral oncogene homolog 2, neuro/glioblastoma derived oncogene homolog (avian)	PROTEIN_AMINO_ACID_PHOSPHORYLATION	PHOSPHORYLATION	TRANSMEMBRANE_RECEPTOR_PROTEIN_TYROSINE_KINASE_SIGNALING_PATHWAY	ENZYME_LINKED_RECEPTOR_PROTEIN_SIGNALING_PATHWAY	POST_TRANSLATIONAL_PROTEIN_MODIFICATION
PTK2B	PTK2B protein tyrosine kinase 2 beta	PROTEIN_AMINO_ACID_PHOSPHORYLATION	PHOSPHORYLATION	TRANSMEMBRANE_RECEPTOR_PROTEIN_TYROSINE_KINASE_SIGNALING_PATHWAY	ENZYME_LINKED_RECEPTOR_PROTEIN_SIGNALING_PATHWAY	POST_TRANSLATIONAL_PROTEIN_MODIFICATION
ERBB3	v-erb-b2 erythroblastic leukemia viral oncogene homolog 3 (avian)	PROTEIN_AMINO_ACID_PHOSPHORYLATION	PHOSPHORYLATION	TRANSMEMBRANE_RECEPTOR_PROTEIN_TYROSINE_KINASE_SIGNALING_PATHWAY	ENZYME_LINKED_RECEPTOR_PROTEIN_SIGNALING_PATHWAY	POST_TRANSLATIONAL_PROTEIN_MODIFICATION
TGFBR1	transforming growth factor, beta receptor I (activin A receptor type II-like kinase, 53kDa)	PROTEIN_AMINO_ACID_PHOSPHORYLATION	PHOSPHORYLATION		ENZYME_LINKED_RECEPTOR_PROTEIN_SIGNALING_PATHWAY	POST_TRANSLATIONAL_PROTEIN_MODIFICATION
ACVR1B	activin A receptor, type IB	PROTEIN_AMINO_ACID_PHOSPHORYLATION	PHOSPHORYLATION		ENZYME_LINKED_RECEPTOR_PROTEIN_SIGNALING_PATHWAY	POST_TRANSLATIONAL_PROTEIN_MODIFICATION
ACVR1	activin A receptor, type I	PROTEIN_AMINO_ACID_PHOSPHORYLATION	PHOSPHORYLATION		ENZYME_LINKED_RECEPTOR_PROTEIN_SIGNALING_PATHWAY	POST_TRANSLATIONAL_PROTEIN_MODIFICATION
BMPR1A	bone morphogenetic protein receptor, type IA	PROTEIN_AMINO_ACID_PHOSPHORYLATION	PHOSPHORYLATION		ENZYME_LINKED_RECEPTOR_PROTEIN_SIGNALING_PATHWAY	POST_TRANSLATIONAL_PROTEIN_MODIFICATION
MAP3K11	mitogen-activated protein kinase kinase kinase 11	PROTEIN_AMINO_ACID_PHOSPHORYLATION	PHOSPHORYLATION			POST_TRANSLATIONAL_PROTEIN_MODIFICATION			PROTEIN_AMINO_ACID_AUTOPHOSPHORYLATION		MAPKKK_CASCADE_GO_0000165
MAP3K13	mitogen-activated protein kinase kinase kinase 13	PROTEIN_AMINO_ACID_PHOSPHORYLATION	PHOSPHORYLATION			POST_TRANSLATIONAL_PROTEIN_MODIFICATION			PROTEIN_AMINO_ACID_AUTOPHOSPHORYLATION		MAPKKK_CASCADE_GO_0000165
MAP3K12	mitogen-activated protein kinase kinase kinase 12	PROTEIN_AMINO_ACID_PHOSPHORYLATION	PHOSPHORYLATION			POST_TRANSLATIONAL_PROTEIN_MODIFICATION			PROTEIN_AMINO_ACID_AUTOPHOSPHORYLATION		MAPKKK_CASCADE_GO_0000165
PAK1	p21/Cdc42/Rac1-activated kinase 1 (STE20 homolog, yeast)	PROTEIN_AMINO_ACID_PHOSPHORYLATION	PHOSPHORYLATION			POST_TRANSLATIONAL_PROTEIN_MODIFICATION			PROTEIN_AMINO_ACID_AUTOPHOSPHORYLATION		MAPKKK_CASCADE_GO_0000165
MAP3K3	mitogen-activated protein kinase kinase kinase 3	PROTEIN_AMINO_ACID_PHOSPHORYLATION	PHOSPHORYLATION			POST_TRANSLATIONAL_PROTEIN_MODIFICATION			PROTEIN_AMINO_ACID_AUTOPHOSPHORYLATION		MAPKKK_CASCADE_GO_0000165
STK4	serine/threonine kinase 4	PROTEIN_AMINO_ACID_PHOSPHORYLATION	PHOSPHORYLATION			POST_TRANSLATIONAL_PROTEIN_MODIFICATION			PROTEIN_AMINO_ACID_AUTOPHOSPHORYLATION
DYRK1A	dual-specificity tyrosine-(Y)-phosphorylation regulated kinase 1A	PROTEIN_AMINO_ACID_PHOSPHORYLATION	PHOSPHORYLATION			POST_TRANSLATIONAL_PROTEIN_MODIFICATION			PROTEIN_AMINO_ACID_AUTOPHOSPHORYLATION
UHMK1	U2AF homology motif (UHM) kinase 1	PROTEIN_AMINO_ACID_PHOSPHORYLATION	PHOSPHORYLATION			POST_TRANSLATIONAL_PROTEIN_MODIFICATION			PROTEIN_AMINO_ACID_AUTOPHOSPHORYLATION
SMG1	-	PROTEIN_AMINO_ACID_PHOSPHORYLATION	PHOSPHORYLATION			POST_TRANSLATIONAL_PROTEIN_MODIFICATION			PROTEIN_AMINO_ACID_AUTOPHOSPHORYLATION
MYO3A	myosin IIIA	PROTEIN_AMINO_ACID_PHOSPHORYLATION	PHOSPHORYLATION			POST_TRANSLATIONAL_PROTEIN_MODIFICATION			PROTEIN_AMINO_ACID_AUTOPHOSPHORYLATION
CDKL5	cyclin-dependent kinase-like 5	PROTEIN_AMINO_ACID_PHOSPHORYLATION	PHOSPHORYLATION			POST_TRANSLATIONAL_PROTEIN_MODIFICATION			PROTEIN_AMINO_ACID_AUTOPHOSPHORYLATION
MAPK15	mitogen-activated protein kinase 15	PROTEIN_AMINO_ACID_PHOSPHORYLATION	PHOSPHORYLATION			POST_TRANSLATIONAL_PROTEIN_MODIFICATION			PROTEIN_AMINO_ACID_AUTOPHOSPHORYLATION
TNK1	tyrosine kinase, non-receptor, 1	PROTEIN_AMINO_ACID_PHOSPHORYLATION	PHOSPHORYLATION			POST_TRANSLATIONAL_PROTEIN_MODIFICATION			PROTEIN_AMINO_ACID_AUTOPHOSPHORYLATION
MAP4K1	mitogen-activated protein kinase kinase kinase kinase 1	PROTEIN_AMINO_ACID_PHOSPHORYLATION	PHOSPHORYLATION			POST_TRANSLATIONAL_PROTEIN_MODIFICATION					MAPKKK_CASCADE_GO_0000165
MAP3K2	mitogen-activated protein kinase kinase kinase 2	PROTEIN_AMINO_ACID_PHOSPHORYLATION	PHOSPHORYLATION			POST_TRANSLATIONAL_PROTEIN_MODIFICATION					MAPKKK_CASCADE_GO_0000165
MAP3K6	mitogen-activated protein kinase kinase kinase 6	PROTEIN_AMINO_ACID_PHOSPHORYLATION	PHOSPHORYLATION			POST_TRANSLATIONAL_PROTEIN_MODIFICATION					MAPKKK_CASCADE_GO_0000165
PKN1	protein kinase N1	PROTEIN_AMINO_ACID_PHOSPHORYLATION	PHOSPHORYLATION			POST_TRANSLATIONAL_PROTEIN_MODIFICATION					MAPKKK_CASCADE_GO_0000165
MAP4K2	mitogen-activated protein kinase kinase kinase kinase 2	PROTEIN_AMINO_ACID_PHOSPHORYLATION	PHOSPHORYLATION			POST_TRANSLATIONAL_PROTEIN_MODIFICATION					MAPKKK_CASCADE_GO_0000165
MAPK8	mitogen-activated protein kinase 8	PROTEIN_AMINO_ACID_PHOSPHORYLATION	PHOSPHORYLATION			POST_TRANSLATIONAL_PROTEIN_MODIFICATION					MAPKKK_CASCADE_GO_0000165
MAPKAPK2	mitogen-activated protein kinase-activated protein kinase 2	PROTEIN_AMINO_ACID_PHOSPHORYLATION	PHOSPHORYLATION			POST_TRANSLATIONAL_PROTEIN_MODIFICATION					MAPKKK_CASCADE_GO_0000165
LCK	lymphocyte-specific protein tyrosine kinase	PROTEIN_AMINO_ACID_PHOSPHORYLATION	PHOSPHORYLATION			POST_TRANSLATIONAL_PROTEIN_MODIFICATION
IL12A	interleukin 12A (natural killer cell stimulatory factor 1, cytotoxic lymphocyte maturation factor 1, p35)	PROTEIN_AMINO_ACID_PHOSPHORYLATION	PHOSPHORYLATION			POST_TRANSLATIONAL_PROTEIN_MODIFICATION
LYN	v-yes-1 Yamaguchi sarcoma viral related oncogene homolog	PROTEIN_AMINO_ACID_PHOSPHORYLATION	PHOSPHORYLATION			POST_TRANSLATIONAL_PROTEIN_MODIFICATION
NEK6	NIMA (never in mitosis gene a)-related kinase 6	PROTEIN_AMINO_ACID_PHOSPHORYLATION	PHOSPHORYLATION			POST_TRANSLATIONAL_PROTEIN_MODIFICATION
FYB	FYN binding protein (FYB-120/130)	PROTEIN_AMINO_ACID_PHOSPHORYLATION	PHOSPHORYLATION			POST_TRANSLATIONAL_PROTEIN_MODIFICATION
NEK11	NIMA (never in mitosis gene a)- related kinase 11	PROTEIN_AMINO_ACID_PHOSPHORYLATION	PHOSPHORYLATION			POST_TRANSLATIONAL_PROTEIN_MODIFICATION
DAPK2	death-associated protein kinase 2	PROTEIN_AMINO_ACID_PHOSPHORYLATION	PHOSPHORYLATION			POST_TRANSLATIONAL_PROTEIN_MODIFICATION
MARK1	MAP/microtubule affinity-regulating kinase 1	PROTEIN_AMINO_ACID_PHOSPHORYLATION	PHOSPHORYLATION			POST_TRANSLATIONAL_PROTEIN_MODIFICATION
MARK2	MAP/microtubule affinity-regulating kinase 2	PROTEIN_AMINO_ACID_PHOSPHORYLATION	PHOSPHORYLATION			POST_TRANSLATIONAL_PROTEIN_MODIFICATION
OXSR1	oxidative-stress responsive 1	PROTEIN_AMINO_ACID_PHOSPHORYLATION	PHOSPHORYLATION			POST_TRANSLATIONAL_PROTEIN_MODIFICATION
WNK1	WNK lysine deficient protein kinase 1	PROTEIN_AMINO_ACID_PHOSPHORYLATION	PHOSPHORYLATION			POST_TRANSLATIONAL_PROTEIN_MODIFICATION
RPS6KA4	ribosomal protein S6 kinase, 90kDa, polypeptide 4	PROTEIN_AMINO_ACID_PHOSPHORYLATION	PHOSPHORYLATION			POST_TRANSLATIONAL_PROTEIN_MODIFICATION
TEC	tec protein tyrosine kinase	PROTEIN_AMINO_ACID_PHOSPHORYLATION	PHOSPHORYLATION			POST_TRANSLATIONAL_PROTEIN_MODIFICATION
WNK2	WNK lysine deficient protein kinase 2	PROTEIN_AMINO_ACID_PHOSPHORYLATION	PHOSPHORYLATION			POST_TRANSLATIONAL_PROTEIN_MODIFICATION
LATS1	LATS, large tumor suppressor, homolog 1 (Drosophila)	PROTEIN_AMINO_ACID_PHOSPHORYLATION	PHOSPHORYLATION			POST_TRANSLATIONAL_PROTEIN_MODIFICATION
IL3	interleukin 3 (colony-stimulating factor, multiple)	PROTEIN_AMINO_ACID_PHOSPHORYLATION	PHOSPHORYLATION			POST_TRANSLATIONAL_PROTEIN_MODIFICATION
TNK2	tyrosine kinase, non-receptor, 2	PROTEIN_AMINO_ACID_PHOSPHORYLATION	PHOSPHORYLATION			POST_TRANSLATIONAL_PROTEIN_MODIFICATION
CD80	CD80 molecule	PROTEIN_AMINO_ACID_PHOSPHORYLATION	PHOSPHORYLATION			POST_TRANSLATIONAL_PROTEIN_MODIFICATION
ITGB2	integrin, beta 2 (complement component 3 receptor 3 and 4 subunit)	PROTEIN_AMINO_ACID_PHOSPHORYLATION	PHOSPHORYLATION			POST_TRANSLATIONAL_PROTEIN_MODIFICATION
ABL1	v-abl Abelson murine leukemia viral oncogene homolog 1	PROTEIN_AMINO_ACID_PHOSPHORYLATION	PHOSPHORYLATION			POST_TRANSLATIONAL_PROTEIN_MODIFICATION
ABL2	v-abl Abelson murine leukemia viral oncogene homolog 2 (arg, Abelson-related gene)	PROTEIN_AMINO_ACID_PHOSPHORYLATION	PHOSPHORYLATION			POST_TRANSLATIONAL_PROTEIN_MODIFICATION
GSK3B	glycogen synthase kinase 3 beta	PROTEIN_AMINO_ACID_PHOSPHORYLATION	PHOSPHORYLATION			POST_TRANSLATIONAL_PROTEIN_MODIFICATION
MATK	megakaryocyte-associated tyrosine kinase	PROTEIN_AMINO_ACID_PHOSPHORYLATION	PHOSPHORYLATION			POST_TRANSLATIONAL_PROTEIN_MODIFICATION
GRK1	G protein-coupled receptor kinase 1	PROTEIN_AMINO_ACID_PHOSPHORYLATION	PHOSPHORYLATION			POST_TRANSLATIONAL_PROTEIN_MODIFICATION
LIMK1	LIM domain kinase 1	PROTEIN_AMINO_ACID_PHOSPHORYLATION	PHOSPHORYLATION			POST_TRANSLATIONAL_PROTEIN_MODIFICATION
BTK	Bruton agammaglobulinemia tyrosine kinase	PROTEIN_AMINO_ACID_PHOSPHORYLATION	PHOSPHORYLATION			POST_TRANSLATIONAL_PROTEIN_MODIFICATION
ADAM10	ADAM metallopeptidase domain 10	PROTEIN_AMINO_ACID_PHOSPHORYLATION	PHOSPHORYLATION			POST_TRANSLATIONAL_PROTEIN_MODIFICATION
MERTK	c-mer proto-oncogene tyrosine kinase	PROTEIN_AMINO_ACID_PHOSPHORYLATION	PHOSPHORYLATION			POST_TRANSLATIONAL_PROTEIN_MODIFICATION
JAK2	Janus kinase 2 (a protein tyrosine kinase)	PROTEIN_AMINO_ACID_PHOSPHORYLATION	PHOSPHORYLATION			POST_TRANSLATIONAL_PROTEIN_MODIFICATION
KALRN	kalirin, RhoGEF kinase	PROTEIN_AMINO_ACID_PHOSPHORYLATION	PHOSPHORYLATION			POST_TRANSLATIONAL_PROTEIN_MODIFICATION
FASTK	Fas-activated serine/threonine kinase	PROTEIN_AMINO_ACID_PHOSPHORYLATION	PHOSPHORYLATION			POST_TRANSLATIONAL_PROTEIN_MODIFICATION
CSNK1D	casein kinase 1, delta	PROTEIN_AMINO_ACID_PHOSPHORYLATION	PHOSPHORYLATION			POST_TRANSLATIONAL_PROTEIN_MODIFICATION
CSNK1E	casein kinase 1, epsilon	PROTEIN_AMINO_ACID_PHOSPHORYLATION	PHOSPHORYLATION			POST_TRANSLATIONAL_PROTEIN_MODIFICATION
PRKAG1	protein kinase, AMP-activated, gamma 1 non-catalytic subunit	PROTEIN_AMINO_ACID_PHOSPHORYLATION	PHOSPHORYLATION			POST_TRANSLATIONAL_PROTEIN_MODIFICATION
RET	ret proto-oncogene (multiple endocrine neoplasia and medullary thyroid carcinoma 1, Hirschsprung disease)	PROTEIN_AMINO_ACID_PHOSPHORYLATION	PHOSPHORYLATION			POST_TRANSLATIONAL_PROTEIN_MODIFICATION
AKT3	v-akt murine thymoma viral oncogene homolog 3 (protein kinase B, gamma)	PROTEIN_AMINO_ACID_PHOSPHORYLATION	PHOSPHORYLATION			POST_TRANSLATIONAL_PROTEIN_MODIFICATION
CAMK2B	calcium/calmodulin-dependent protein kinase (CaM kinase) II beta	PROTEIN_AMINO_ACID_PHOSPHORYLATION	PHOSPHORYLATION			POST_TRANSLATIONAL_PROTEIN_MODIFICATION
CSNK1G2	casein kinase 1, gamma 2	PROTEIN_AMINO_ACID_PHOSPHORYLATION	PHOSPHORYLATION			POST_TRANSLATIONAL_PROTEIN_MODIFICATION
CSNK2A1	casein kinase 2, alpha 1 polypeptide	PROTEIN_AMINO_ACID_PHOSPHORYLATION	PHOSPHORYLATION			POST_TRANSLATIONAL_PROTEIN_MODIFICATION
LTK	leukocyte tyrosine kinase	PROTEIN_AMINO_ACID_PHOSPHORYLATION	PHOSPHORYLATION			POST_TRANSLATIONAL_PROTEIN_MODIFICATION
MAPK6	mitogen-activated protein kinase 6	PROTEIN_AMINO_ACID_PHOSPHORYLATION	PHOSPHORYLATION			POST_TRANSLATIONAL_PROTEIN_MODIFICATION
PKN2	protein kinase N2	PROTEIN_AMINO_ACID_PHOSPHORYLATION	PHOSPHORYLATION			POST_TRANSLATIONAL_PROTEIN_MODIFICATION
PKN3	protein kinase N3	PROTEIN_AMINO_ACID_PHOSPHORYLATION	PHOSPHORYLATION			POST_TRANSLATIONAL_PROTEIN_MODIFICATION
PRKAA1	protein kinase, AMP-activated, alpha 1 catalytic subunit	PROTEIN_AMINO_ACID_PHOSPHORYLATION	PHOSPHORYLATION			POST_TRANSLATIONAL_PROTEIN_MODIFICATION
PRKAA2	protein kinase, AMP-activated, alpha 2 catalytic subunit	PROTEIN_AMINO_ACID_PHOSPHORYLATION	PHOSPHORYLATION			POST_TRANSLATIONAL_PROTEIN_MODIFICATION
CDK2AP1	CDK2-associated protein 1	PROTEIN_AMINO_ACID_PHOSPHORYLATION	PHOSPHORYLATION			POST_TRANSLATIONAL_PROTEIN_MODIFICATION
AURKA	aurora kinase A	PROTEIN_AMINO_ACID_PHOSPHORYLATION	PHOSPHORYLATION			POST_TRANSLATIONAL_PROTEIN_MODIFICATION
PRKCG	protein kinase C, gamma	PROTEIN_AMINO_ACID_PHOSPHORYLATION	PHOSPHORYLATION			POST_TRANSLATIONAL_PROTEIN_MODIFICATION
CAMK2A	calcium/calmodulin-dependent protein kinase (CaM kinase) II alpha	PROTEIN_AMINO_ACID_PHOSPHORYLATION	PHOSPHORYLATION			POST_TRANSLATIONAL_PROTEIN_MODIFICATION
TSSK4	testis-specific serine kinase 4	PROTEIN_AMINO_ACID_PHOSPHORYLATION	PHOSPHORYLATION			POST_TRANSLATIONAL_PROTEIN_MODIFICATION
BMX	BMX non-receptor tyrosine kinase	PROTEIN_AMINO_ACID_PHOSPHORYLATION	PHOSPHORYLATION			POST_TRANSLATIONAL_PROTEIN_MODIFICATION
HCK	hemopoietic cell kinase	PROTEIN_AMINO_ACID_PHOSPHORYLATION	PHOSPHORYLATION			POST_TRANSLATIONAL_PROTEIN_MODIFICATION
BRAF	v-raf murine sarcoma viral oncogene homolog B1	PROTEIN_AMINO_ACID_PHOSPHORYLATION	PHOSPHORYLATION			POST_TRANSLATIONAL_PROTEIN_MODIFICATION
PRKCZ	protein kinase C, zeta	PROTEIN_AMINO_ACID_PHOSPHORYLATION	PHOSPHORYLATION			POST_TRANSLATIONAL_PROTEIN_MODIFICATION
PIM1	pim-1 oncogene	PROTEIN_AMINO_ACID_PHOSPHORYLATION	PHOSPHORYLATION			POST_TRANSLATIONAL_PROTEIN_MODIFICATION
STK11	serine/threonine kinase 11	PROTEIN_AMINO_ACID_PHOSPHORYLATION	PHOSPHORYLATION			POST_TRANSLATIONAL_PROTEIN_MODIFICATION
STK36	serine/threonine kinase 36 (fused homolog, Drosophila)	PROTEIN_AMINO_ACID_PHOSPHORYLATION	PHOSPHORYLATION			POST_TRANSLATIONAL_PROTEIN_MODIFICATION
CDK9	cyclin-dependent kinase 9 (CDC2-related kinase)	PROTEIN_AMINO_ACID_PHOSPHORYLATION	PHOSPHORYLATION			POST_TRANSLATIONAL_PROTEIN_MODIFICATION
STK16	serine/threonine kinase 16	PROTEIN_AMINO_ACID_PHOSPHORYLATION	PHOSPHORYLATION			POST_TRANSLATIONAL_PROTEIN_MODIFICATION
LIPE	lipase, hormone-sensitive	PROTEIN_AMINO_ACID_PHOSPHORYLATION	PHOSPHORYLATION			POST_TRANSLATIONAL_PROTEIN_MODIFICATION
FGR	Gardner-Rasheed feline sarcoma viral (v-fgr) oncogene homolog	PROTEIN_AMINO_ACID_PHOSPHORYLATION	PHOSPHORYLATION			POST_TRANSLATIONAL_PROTEIN_MODIFICATION
PRKCE	protein kinase C, epsilon	PROTEIN_AMINO_ACID_PHOSPHORYLATION	PHOSPHORYLATION			POST_TRANSLATIONAL_PROTEIN_MODIFICATION
EIF2AK4	eukaryotic translation initiation factor 2 alpha kinase 4	PROTEIN_AMINO_ACID_PHOSPHORYLATION	PHOSPHORYLATION			POST_TRANSLATIONAL_PROTEIN_MODIFICATION
FRK	fyn-related kinase	PROTEIN_AMINO_ACID_PHOSPHORYLATION	PHOSPHORYLATION			POST_TRANSLATIONAL_PROTEIN_MODIFICATION
FES	feline sarcoma oncogene	PROTEIN_AMINO_ACID_PHOSPHORYLATION	PHOSPHORYLATION			POST_TRANSLATIONAL_PROTEIN_MODIFICATION
PRKD1	protein kinase D1	PROTEIN_AMINO_ACID_PHOSPHORYLATION	PHOSPHORYLATION			POST_TRANSLATIONAL_PROTEIN_MODIFICATION
EPHB2	EPH receptor B2	PROTEIN_AMINO_ACID_PHOSPHORYLATION	PHOSPHORYLATION			POST_TRANSLATIONAL_PROTEIN_MODIFICATION
SGK3	serum/glucocorticoid regulated kinase family, member 3	PROTEIN_AMINO_ACID_PHOSPHORYLATION	PHOSPHORYLATION			POST_TRANSLATIONAL_PROTEIN_MODIFICATION
BCR	breakpoint cluster region	PROTEIN_AMINO_ACID_PHOSPHORYLATION	PHOSPHORYLATION			POST_TRANSLATIONAL_PROTEIN_MODIFICATION
CDKL1	cyclin-dependent kinase-like 1 (CDC2-related kinase)	PROTEIN_AMINO_ACID_PHOSPHORYLATION	PHOSPHORYLATION			POST_TRANSLATIONAL_PROTEIN_MODIFICATION
CSK	c-src tyrosine kinase	PROTEIN_AMINO_ACID_PHOSPHORYLATION	PHOSPHORYLATION			POST_TRANSLATIONAL_PROTEIN_MODIFICATION
CSNK1A1	casein kinase 1, alpha 1	PROTEIN_AMINO_ACID_PHOSPHORYLATION	PHOSPHORYLATION			POST_TRANSLATIONAL_PROTEIN_MODIFICATION
EPHA5	EPH receptor A5	PROTEIN_AMINO_ACID_PHOSPHORYLATION	PHOSPHORYLATION			POST_TRANSLATIONAL_PROTEIN_MODIFICATION
EPHA8	EPH receptor A8	PROTEIN_AMINO_ACID_PHOSPHORYLATION	PHOSPHORYLATION			POST_TRANSLATIONAL_PROTEIN_MODIFICATION
ILK	integrin-linked kinase	PROTEIN_AMINO_ACID_PHOSPHORYLATION	PHOSPHORYLATION			POST_TRANSLATIONAL_PROTEIN_MODIFICATION
JAK3	Janus kinase 3 (a protein tyrosine kinase, leukocyte)	PROTEIN_AMINO_ACID_PHOSPHORYLATION	PHOSPHORYLATION			POST_TRANSLATIONAL_PROTEIN_MODIFICATION
MAPK3	mitogen-activated protein kinase 3	PROTEIN_AMINO_ACID_PHOSPHORYLATION	PHOSPHORYLATION			POST_TRANSLATIONAL_PROTEIN_MODIFICATION
MAPK4	mitogen-activated protein kinase 4	PROTEIN_AMINO_ACID_PHOSPHORYLATION	PHOSPHORYLATION			POST_TRANSLATIONAL_PROTEIN_MODIFICATION
MYLK	myosin, light chain kinase	PROTEIN_AMINO_ACID_PHOSPHORYLATION	PHOSPHORYLATION			POST_TRANSLATIONAL_PROTEIN_MODIFICATION
PLK4	polo-like kinase 4 (Drosophila)	PROTEIN_AMINO_ACID_PHOSPHORYLATION	PHOSPHORYLATION			POST_TRANSLATIONAL_PROTEIN_MODIFICATION
PRKCD	protein kinase C, delta	PROTEIN_AMINO_ACID_PHOSPHORYLATION	PHOSPHORYLATION			POST_TRANSLATIONAL_PROTEIN_MODIFICATION
PRKCH	protein kinase C, eta	PROTEIN_AMINO_ACID_PHOSPHORYLATION	PHOSPHORYLATION			POST_TRANSLATIONAL_PROTEIN_MODIFICATION
PTK6	PTK6 protein tyrosine kinase 6	PROTEIN_AMINO_ACID_PHOSPHORYLATION	PHOSPHORYLATION			POST_TRANSLATIONAL_PROTEIN_MODIFICATION
RIPK4	receptor-interacting serine-threonine kinase 4	PROTEIN_AMINO_ACID_PHOSPHORYLATION	PHOSPHORYLATION			POST_TRANSLATIONAL_PROTEIN_MODIFICATION
ROCK2	Rho-associated, coiled-coil containing protein kinase 2	PROTEIN_AMINO_ACID_PHOSPHORYLATION	PHOSPHORYLATION			POST_TRANSLATIONAL_PROTEIN_MODIFICATION
TXK	TXK tyrosine kinase	PROTEIN_AMINO_ACID_PHOSPHORYLATION	PHOSPHORYLATION			POST_TRANSLATIONAL_PROTEIN_MODIFICATION
TYK2	tyrosine kinase 2	PROTEIN_AMINO_ACID_PHOSPHORYLATION	PHOSPHORYLATION			POST_TRANSLATIONAL_PROTEIN_MODIFICATION
EGF	epidermal growth factor (beta-urogastrone)		PHOSPHORYLATION	TRANSMEMBRANE_RECEPTOR_PROTEIN_TYROSINE_KINASE_SIGNALING_PATHWAY	ENZYME_LINKED_RECEPTOR_PROTEIN_SIGNALING_PATHWAY		EPIDERMAL_GROWTH_FACTOR_RECEPTOR_SIGNALING_PATHWAY				MAPKKK_CASCADE_GO_0000165
EREG	epiregulin		PHOSPHORYLATION	TRANSMEMBRANE_RECEPTOR_PROTEIN_TYROSINE_KINASE_SIGNALING_PATHWAY	ENZYME_LINKED_RECEPTOR_PROTEIN_SIGNALING_PATHWAY		EPIDERMAL_GROWTH_FACTOR_RECEPTOR_SIGNALING_PATHWAY
PIK3R1	phosphoinositide-3-kinase, regulatory subunit 1 (p85 alpha)		PHOSPHORYLATION	TRANSMEMBRANE_RECEPTOR_PROTEIN_TYROSINE_KINASE_SIGNALING_PATHWAY	ENZYME_LINKED_RECEPTOR_PROTEIN_SIGNALING_PATHWAY			INSULIN_RECEPTOR_SIGNALING_PATHWAY
BCL10	B-cell CLL/lymphoma 10		PHOSPHORYLATION			POST_TRANSLATIONAL_PROTEIN_MODIFICATION
CD24	CD24 molecule		PHOSPHORYLATION								MAPKKK_CASCADE_GO_0000165
RAD17	RAD17 homolog (S. pombe)		PHOSPHORYLATION
CDKN1A	cyclin-dependent kinase inhibitor 1A (p21, Cip1)		PHOSPHORYLATION
CDKN1B	cyclin-dependent kinase inhibitor 1B (p27, Kip1)		PHOSPHORYLATION
CBL	Cas-Br-M (murine) ecotropic retroviral transforming sequence			TRANSMEMBRANE_RECEPTOR_PROTEIN_TYROSINE_KINASE_SIGNALING_PATHWAY	ENZYME_LINKED_RECEPTOR_PROTEIN_SIGNALING_PATHWAY	POST_TRANSLATIONAL_PROTEIN_MODIFICATION	EPIDERMAL_GROWTH_FACTOR_RECEPTOR_SIGNALING_PATHWAY
PTPRJ	protein tyrosine phosphatase, receptor type, J			TRANSMEMBRANE_RECEPTOR_PROTEIN_TYROSINE_KINASE_SIGNALING_PATHWAY	ENZYME_LINKED_RECEPTOR_PROTEIN_SIGNALING_PATHWAY	POST_TRANSLATIONAL_PROTEIN_MODIFICATION				PROTEIN_AMINO_ACID_DEPHOSPHORYLATION
BCAR1	breast cancer anti-estrogen resistance 1			TRANSMEMBRANE_RECEPTOR_PROTEIN_TYROSINE_KINASE_SIGNALING_PATHWAY	ENZYME_LINKED_RECEPTOR_PROTEIN_SIGNALING_PATHWAY		EPIDERMAL_GROWTH_FACTOR_RECEPTOR_SIGNALING_PATHWAY	INSULIN_RECEPTOR_SIGNALING_PATHWAY
GRB2	growth factor receptor-bound protein 2			TRANSMEMBRANE_RECEPTOR_PROTEIN_TYROSINE_KINASE_SIGNALING_PATHWAY	ENZYME_LINKED_RECEPTOR_PROTEIN_SIGNALING_PATHWAY		EPIDERMAL_GROWTH_FACTOR_RECEPTOR_SIGNALING_PATHWAY	INSULIN_RECEPTOR_SIGNALING_PATHWAY
GAB1	GRB2-associated binding protein 1			TRANSMEMBRANE_RECEPTOR_PROTEIN_TYROSINE_KINASE_SIGNALING_PATHWAY	ENZYME_LINKED_RECEPTOR_PROTEIN_SIGNALING_PATHWAY		EPIDERMAL_GROWTH_FACTOR_RECEPTOR_SIGNALING_PATHWAY	INSULIN_RECEPTOR_SIGNALING_PATHWAY
TGFA	transforming growth factor, alpha			TRANSMEMBRANE_RECEPTOR_PROTEIN_TYROSINE_KINASE_SIGNALING_PATHWAY	ENZYME_LINKED_RECEPTOR_PROTEIN_SIGNALING_PATHWAY		EPIDERMAL_GROWTH_FACTOR_RECEPTOR_SIGNALING_PATHWAY				MAPKKK_CASCADE_GO_0000165
SHC1	SHC (Src homology 2 domain containing) transforming protein 1			TRANSMEMBRANE_RECEPTOR_PROTEIN_TYROSINE_KINASE_SIGNALING_PATHWAY	ENZYME_LINKED_RECEPTOR_PROTEIN_SIGNALING_PATHWAY		EPIDERMAL_GROWTH_FACTOR_RECEPTOR_SIGNALING_PATHWAY				MAPKKK_CASCADE_GO_0000165
NCK2	NCK adaptor protein 2			TRANSMEMBRANE_RECEPTOR_PROTEIN_TYROSINE_KINASE_SIGNALING_PATHWAY	ENZYME_LINKED_RECEPTOR_PROTEIN_SIGNALING_PATHWAY		EPIDERMAL_GROWTH_FACTOR_RECEPTOR_SIGNALING_PATHWAY
REPS2	RALBP1 associated Eps domain containing 2			TRANSMEMBRANE_RECEPTOR_PROTEIN_TYROSINE_KINASE_SIGNALING_PATHWAY	ENZYME_LINKED_RECEPTOR_PROTEIN_SIGNALING_PATHWAY		EPIDERMAL_GROWTH_FACTOR_RECEPTOR_SIGNALING_PATHWAY
EPS15	epidermal growth factor receptor pathway substrate 15			TRANSMEMBRANE_RECEPTOR_PROTEIN_TYROSINE_KINASE_SIGNALING_PATHWAY	ENZYME_LINKED_RECEPTOR_PROTEIN_SIGNALING_PATHWAY		EPIDERMAL_GROWTH_FACTOR_RECEPTOR_SIGNALING_PATHWAY
SHC3	SHC (Src homology 2 domain containing) transforming protein 3			TRANSMEMBRANE_RECEPTOR_PROTEIN_TYROSINE_KINASE_SIGNALING_PATHWAY	ENZYME_LINKED_RECEPTOR_PROTEIN_SIGNALING_PATHWAY		EPIDERMAL_GROWTH_FACTOR_RECEPTOR_SIGNALING_PATHWAY
GRB7	growth factor receptor-bound protein 7			TRANSMEMBRANE_RECEPTOR_PROTEIN_TYROSINE_KINASE_SIGNALING_PATHWAY	ENZYME_LINKED_RECEPTOR_PROTEIN_SIGNALING_PATHWAY		EPIDERMAL_GROWTH_FACTOR_RECEPTOR_SIGNALING_PATHWAY
GRB10	growth factor receptor-bound protein 10			TRANSMEMBRANE_RECEPTOR_PROTEIN_TYROSINE_KINASE_SIGNALING_PATHWAY	ENZYME_LINKED_RECEPTOR_PROTEIN_SIGNALING_PATHWAY			INSULIN_RECEPTOR_SIGNALING_PATHWAY
IRS1	insulin receptor substrate 1			TRANSMEMBRANE_RECEPTOR_PROTEIN_TYROSINE_KINASE_SIGNALING_PATHWAY	ENZYME_LINKED_RECEPTOR_PROTEIN_SIGNALING_PATHWAY			INSULIN_RECEPTOR_SIGNALING_PATHWAY
PIK3R3	phosphoinositide-3-kinase, regulatory subunit 3 (p55, gamma)			TRANSMEMBRANE_RECEPTOR_PROTEIN_TYROSINE_KINASE_SIGNALING_PATHWAY	ENZYME_LINKED_RECEPTOR_PROTEIN_SIGNALING_PATHWAY			INSULIN_RECEPTOR_SIGNALING_PATHWAY
MAPK8IP2	mitogen-activated protein kinase 8 interacting protein 2			TRANSMEMBRANE_RECEPTOR_PROTEIN_TYROSINE_KINASE_SIGNALING_PATHWAY	ENZYME_LINKED_RECEPTOR_PROTEIN_SIGNALING_PATHWAY						MAPKKK_CASCADE_GO_0000165
CD3E	CD3e molecule, epsilon (CD3-TCR complex)			TRANSMEMBRANE_RECEPTOR_PROTEIN_TYROSINE_KINASE_SIGNALING_PATHWAY	ENZYME_LINKED_RECEPTOR_PROTEIN_SIGNALING_PATHWAY
SRC	v-src sarcoma (Schmidt-Ruppin A-2) viral oncogene homolog (avian)			TRANSMEMBRANE_RECEPTOR_PROTEIN_TYROSINE_KINASE_SIGNALING_PATHWAY	ENZYME_LINKED_RECEPTOR_PROTEIN_SIGNALING_PATHWAY
PRLR	prolactin receptor			TRANSMEMBRANE_RECEPTOR_PROTEIN_TYROSINE_KINASE_SIGNALING_PATHWAY	ENZYME_LINKED_RECEPTOR_PROTEIN_SIGNALING_PATHWAY
FLT3	fms-related tyrosine kinase 3			TRANSMEMBRANE_RECEPTOR_PROTEIN_TYROSINE_KINASE_SIGNALING_PATHWAY	ENZYME_LINKED_RECEPTOR_PROTEIN_SIGNALING_PATHWAY
FLT4	fms-related tyrosine kinase 4			TRANSMEMBRANE_RECEPTOR_PROTEIN_TYROSINE_KINASE_SIGNALING_PATHWAY	ENZYME_LINKED_RECEPTOR_PROTEIN_SIGNALING_PATHWAY
LCP2	lymphocyte cytosolic protein 2 (SH2 domain containing leukocyte protein of 76kDa)			TRANSMEMBRANE_RECEPTOR_PROTEIN_TYROSINE_KINASE_SIGNALING_PATHWAY	ENZYME_LINKED_RECEPTOR_PROTEIN_SIGNALING_PATHWAY
PXN	paxillin			TRANSMEMBRANE_RECEPTOR_PROTEIN_TYROSINE_KINASE_SIGNALING_PATHWAY	ENZYME_LINKED_RECEPTOR_PROTEIN_SIGNALING_PATHWAY
BDKRB2	bradykinin receptor B2			TRANSMEMBRANE_RECEPTOR_PROTEIN_TYROSINE_KINASE_SIGNALING_PATHWAY	ENZYME_LINKED_RECEPTOR_PROTEIN_SIGNALING_PATHWAY
EFNB3	ephrin-B3			TRANSMEMBRANE_RECEPTOR_PROTEIN_TYROSINE_KINASE_SIGNALING_PATHWAY	ENZYME_LINKED_RECEPTOR_PROTEIN_SIGNALING_PATHWAY
MPZL1	myelin protein zero-like 1			TRANSMEMBRANE_RECEPTOR_PROTEIN_TYROSINE_KINASE_SIGNALING_PATHWAY	ENZYME_LINKED_RECEPTOR_PROTEIN_SIGNALING_PATHWAY
TEK	TEK tyrosine kinase, endothelial (venous malformations, multiple cutaneous and mucosal)			TRANSMEMBRANE_RECEPTOR_PROTEIN_TYROSINE_KINASE_SIGNALING_PATHWAY	ENZYME_LINKED_RECEPTOR_PROTEIN_SIGNALING_PATHWAY
FRS2	fibroblast growth factor receptor substrate 2			TRANSMEMBRANE_RECEPTOR_PROTEIN_TYROSINE_KINASE_SIGNALING_PATHWAY	ENZYME_LINKED_RECEPTOR_PROTEIN_SIGNALING_PATHWAY
DOK1	docking protein 1, 62kDa (downstream of tyrosine kinase 1)			TRANSMEMBRANE_RECEPTOR_PROTEIN_TYROSINE_KINASE_SIGNALING_PATHWAY	ENZYME_LINKED_RECEPTOR_PROTEIN_SIGNALING_PATHWAY
FRS3	fibroblast growth factor receptor substrate 3			TRANSMEMBRANE_RECEPTOR_PROTEIN_TYROSINE_KINASE_SIGNALING_PATHWAY	ENZYME_LINKED_RECEPTOR_PROTEIN_SIGNALING_PATHWAY
KDR	kinase insert domain receptor (a type III receptor tyrosine kinase)			TRANSMEMBRANE_RECEPTOR_PROTEIN_TYROSINE_KINASE_SIGNALING_PATHWAY	ENZYME_LINKED_RECEPTOR_PROTEIN_SIGNALING_PATHWAY
NTRK1	neurotrophic tyrosine kinase, receptor, type 1			TRANSMEMBRANE_RECEPTOR_PROTEIN_TYROSINE_KINASE_SIGNALING_PATHWAY	ENZYME_LINKED_RECEPTOR_PROTEIN_SIGNALING_PATHWAY
NTRK2	neurotrophic tyrosine kinase, receptor, type 2			TRANSMEMBRANE_RECEPTOR_PROTEIN_TYROSINE_KINASE_SIGNALING_PATHWAY	ENZYME_LINKED_RECEPTOR_PROTEIN_SIGNALING_PATHWAY
NTRK3	neurotrophic tyrosine kinase, receptor, type 3			TRANSMEMBRANE_RECEPTOR_PROTEIN_TYROSINE_KINASE_SIGNALING_PATHWAY	ENZYME_LINKED_RECEPTOR_PROTEIN_SIGNALING_PATHWAY
RAPGEF1	Rap guanine nucleotide exchange factor (GEF) 1			TRANSMEMBRANE_RECEPTOR_PROTEIN_TYROSINE_KINASE_SIGNALING_PATHWAY	ENZYME_LINKED_RECEPTOR_PROTEIN_SIGNALING_PATHWAY
ROR1	receptor tyrosine kinase-like orphan receptor 1			TRANSMEMBRANE_RECEPTOR_PROTEIN_TYROSINE_KINASE_SIGNALING_PATHWAY	ENZYME_LINKED_RECEPTOR_PROTEIN_SIGNALING_PATHWAY
SMURF1	SMAD specific E3 ubiquitin protein ligase 1				ENZYME_LINKED_RECEPTOR_PROTEIN_SIGNALING_PATHWAY	POST_TRANSLATIONAL_PROTEIN_MODIFICATION
MAP3K7	mitogen-activated protein kinase kinase kinase 7				ENZYME_LINKED_RECEPTOR_PROTEIN_SIGNALING_PATHWAY
ACVR2A	activin A receptor, type IIA				ENZYME_LINKED_RECEPTOR_PROTEIN_SIGNALING_PATHWAY
ACVR2B	activin A receptor, type IIB				ENZYME_LINKED_RECEPTOR_PROTEIN_SIGNALING_PATHWAY
FOXH1	forkhead box H1				ENZYME_LINKED_RECEPTOR_PROTEIN_SIGNALING_PATHWAY
LTBP2	latent transforming growth factor beta binding protein 2				ENZYME_LINKED_RECEPTOR_PROTEIN_SIGNALING_PATHWAY
GDF5	growth differentiation factor 5 (cartilage-derived morphogenetic protein-1)				ENZYME_LINKED_RECEPTOR_PROTEIN_SIGNALING_PATHWAY
GUCY2C	guanylate cyclase 2C (heat stable enterotoxin receptor)				ENZYME_LINKED_RECEPTOR_PROTEIN_SIGNALING_PATHWAY
PTPRF	protein tyrosine phosphatase, receptor type, F				ENZYME_LINKED_RECEPTOR_PROTEIN_SIGNALING_PATHWAY
DUSP10	dual specificity phosphatase 10					POST_TRANSLATIONAL_PROTEIN_MODIFICATION				PROTEIN_AMINO_ACID_DEPHOSPHORYLATION	MAPKKK_CASCADE_GO_0000165
DUSP22	dual specificity phosphatase 22					POST_TRANSLATIONAL_PROTEIN_MODIFICATION				PROTEIN_AMINO_ACID_DEPHOSPHORYLATION	MAPKKK_CASCADE_GO_0000165
DUSP2	dual specificity phosphatase 2					POST_TRANSLATIONAL_PROTEIN_MODIFICATION				PROTEIN_AMINO_ACID_DEPHOSPHORYLATION	MAPKKK_CASCADE_GO_0000165
DUSP6	dual specificity phosphatase 6					POST_TRANSLATIONAL_PROTEIN_MODIFICATION				PROTEIN_AMINO_ACID_DEPHOSPHORYLATION	MAPKKK_CASCADE_GO_0000165
DUSP4	dual specificity phosphatase 4					POST_TRANSLATIONAL_PROTEIN_MODIFICATION				PROTEIN_AMINO_ACID_DEPHOSPHORYLATION	MAPKKK_CASCADE_GO_0000165
PTPRC	protein tyrosine phosphatase, receptor type, C					POST_TRANSLATIONAL_PROTEIN_MODIFICATION				PROTEIN_AMINO_ACID_DEPHOSPHORYLATION
PPP2R4	protein phosphatase 2A, regulatory subunit B' (PR 53)					POST_TRANSLATIONAL_PROTEIN_MODIFICATION				PROTEIN_AMINO_ACID_DEPHOSPHORYLATION
PTPN6	protein tyrosine phosphatase, non-receptor type 6					POST_TRANSLATIONAL_PROTEIN_MODIFICATION				PROTEIN_AMINO_ACID_DEPHOSPHORYLATION
DUSP13	dual specificity phosphatase 13					POST_TRANSLATIONAL_PROTEIN_MODIFICATION				PROTEIN_AMINO_ACID_DEPHOSPHORYLATION
PPP2R3B	protein phosphatase 2 (formerly 2A), regulatory subunit B'', beta					POST_TRANSLATIONAL_PROTEIN_MODIFICATION				PROTEIN_AMINO_ACID_DEPHOSPHORYLATION
PTPRR	protein tyrosine phosphatase, receptor type, R					POST_TRANSLATIONAL_PROTEIN_MODIFICATION				PROTEIN_AMINO_ACID_DEPHOSPHORYLATION
CTDP1	CTD (carboxy-terminal domain, RNA polymerase II, polypeptide A) phosphatase, subunit 1					POST_TRANSLATIONAL_PROTEIN_MODIFICATION				PROTEIN_AMINO_ACID_DEPHOSPHORYLATION
DUSP3	dual specificity phosphatase 3 (vaccinia virus phosphatase VH1-related)					POST_TRANSLATIONAL_PROTEIN_MODIFICATION				PROTEIN_AMINO_ACID_DEPHOSPHORYLATION
DUSP5	dual specificity phosphatase 5					POST_TRANSLATIONAL_PROTEIN_MODIFICATION				PROTEIN_AMINO_ACID_DEPHOSPHORYLATION
PTPN12	protein tyrosine phosphatase, non-receptor type 12					POST_TRANSLATIONAL_PROTEIN_MODIFICATION				PROTEIN_AMINO_ACID_DEPHOSPHORYLATION
PTPN13	protein tyrosine phosphatase, non-receptor type 13 (APO-1/CD95 (Fas)-associated phosphatase)					POST_TRANSLATIONAL_PROTEIN_MODIFICATION				PROTEIN_AMINO_ACID_DEPHOSPHORYLATION
PTPN18	protein tyrosine phosphatase, non-receptor type 18 (brain-derived)					POST_TRANSLATIONAL_PROTEIN_MODIFICATION				PROTEIN_AMINO_ACID_DEPHOSPHORYLATION
PTPN2	protein tyrosine phosphatase, non-receptor type 2					POST_TRANSLATIONAL_PROTEIN_MODIFICATION				PROTEIN_AMINO_ACID_DEPHOSPHORYLATION
PTPN21	protein tyrosine phosphatase, non-receptor type 21					POST_TRANSLATIONAL_PROTEIN_MODIFICATION				PROTEIN_AMINO_ACID_DEPHOSPHORYLATION
PTPN3	protein tyrosine phosphatase, non-receptor type 3					POST_TRANSLATIONAL_PROTEIN_MODIFICATION				PROTEIN_AMINO_ACID_DEPHOSPHORYLATION
PTPN4	protein tyrosine phosphatase, non-receptor type 4 (megakaryocyte)					POST_TRANSLATIONAL_PROTEIN_MODIFICATION				PROTEIN_AMINO_ACID_DEPHOSPHORYLATION
PTPN7	protein tyrosine phosphatase, non-receptor type 7					POST_TRANSLATIONAL_PROTEIN_MODIFICATION				PROTEIN_AMINO_ACID_DEPHOSPHORYLATION
PTPRB	protein tyrosine phosphatase, receptor type, B					POST_TRANSLATIONAL_PROTEIN_MODIFICATION				PROTEIN_AMINO_ACID_DEPHOSPHORYLATION
PTPRE	protein tyrosine phosphatase, receptor type, E					POST_TRANSLATIONAL_PROTEIN_MODIFICATION				PROTEIN_AMINO_ACID_DEPHOSPHORYLATION
PTPRH	protein tyrosine phosphatase, receptor type, H					POST_TRANSLATIONAL_PROTEIN_MODIFICATION				PROTEIN_AMINO_ACID_DEPHOSPHORYLATION
PTPRN2	protein tyrosine phosphatase, receptor type, N polypeptide 2					POST_TRANSLATIONAL_PROTEIN_MODIFICATION				PROTEIN_AMINO_ACID_DEPHOSPHORYLATION
METAP2	methionyl aminopeptidase 2					POST_TRANSLATIONAL_PROTEIN_MODIFICATION
PTCH1	patched homolog 1 (Drosophila)					POST_TRANSLATIONAL_PROTEIN_MODIFICATION
GAD1	glutamate decarboxylase 1 (brain, 67kDa)					POST_TRANSLATIONAL_PROTEIN_MODIFICATION
NMT1	N-myristoyltransferase 1					POST_TRANSLATIONAL_PROTEIN_MODIFICATION
MAP3K5	mitogen-activated protein kinase kinase kinase 5										MAPKKK_CASCADE_GO_0000165
MAP3K4	mitogen-activated protein kinase kinase kinase 4										MAPKKK_CASCADE_GO_0000165
CRKL	v-crk sarcoma virus CT10 oncogene homolog (avian)-like										MAPKKK_CASCADE_GO_0000165
MAPK8IP1	mitogen-activated protein kinase 8 interacting protein 1										MAPKKK_CASCADE_GO_0000165
MAPK8IP3	mitogen-activated protein kinase 8 interacting protein 3										MAPKKK_CASCADE_GO_0000165
MAPK9	mitogen-activated protein kinase 9										MAPKKK_CASCADE_GO_0000165
TNIK	TRAF2 and NCK interacting kinase										MAPKKK_CASCADE_GO_0000165
MAP2K4	mitogen-activated protein kinase kinase 4										MAPKKK_CASCADE_GO_0000165
MAPK10	mitogen-activated protein kinase 10										MAPKKK_CASCADE_GO_0000165
SH2D3C	SH2 domain containing 3C										MAPKKK_CASCADE_GO_0000165
MAP2K7	mitogen-activated protein kinase kinase 7										MAPKKK_CASCADE_GO_0000165
PLCE1	phospholipase C, epsilon 1										MAPKKK_CASCADE_GO_0000165
CXCR4	chemokine (C-X-C motif) receptor 4										MAPKKK_CASCADE_GO_0000165
PIK3CB	phosphoinositide-3-kinase, catalytic, beta polypeptide										MAPKKK_CASCADE_GO_0000165
DUSP16	dual specificity phosphatase 16										MAPKKK_CASCADE_GO_0000165
SCG2	secretogranin II (chromogranin C)										MAPKKK_CASCADE_GO_0000165
FGFR1	fibroblast growth factor receptor 1 (fms-related tyrosine kinase 2, Pfeiffer syndrome)										MAPKKK_CASCADE_GO_0000165
NCK1	NCK adaptor protein 1
CD28	CD28 molecule
IL21	interleukin 21
IL7	interleukin 7
SOCS5	suppressor of cytokine signaling 5
ZAP70	zeta-chain (TCR) associated protein kinase 70kDa
CCR2	chemokine (C-C motif) receptor 2
IFNAR1	interferon (alpha, beta and omega) receptor 1
IFNAR2	interferon (alpha, beta and omega) receptor 2
SOCS2	suppressor of cytokine signaling 2
SOCS3	suppressor of cytokine signaling 3
NMI	N-myc (and STAT) interactor
SOCS6	suppressor of cytokine signaling 6
STAT3	signal transducer and activator of transcription 3 (acute-phase response factor)
STAT2	signal transducer and activator of transcription 2, 113kDa
STAT5A	signal transducer and activator of transcription 5A
STAT5B	signal transducer and activator of transcription 5B
FYN	FYN oncogene related to SRC, FGR, YES
GJA1	gap junction protein, alpha 1, 43kDa (connexin 43)
RHOA	ras homolog gene family, member A
NLK	nemo-like kinase
CARD8	caspase recruitment domain family, member 8
TRIP6	thyroid hormone receptor interactor 6
RHOH	ras homolog gene family, member H
FASLG	Fas ligand (TNF superfamily, member 6)
RIPK2	receptor-interacting serine-threonine kinase 2
ECT2	epithelial cell transforming sequence 2 oncogene
FKBP1A	FK506 binding protein 1A, 12kDa
HMOX1	heme oxygenase (decycling) 1
TBK1	TANK-binding kinase 1
MAPK11	mitogen-activated protein kinase 11
MAPK13	mitogen-activated protein kinase 13
BLK	B lymphoid tyrosine kinase
RPS6KA2	ribosomal protein S6 kinase, 90kDa, polypeptide 2
LAT	linker for activation of T cells
SIT1	signaling threshold regulating transmembrane adaptor 1
LST1	leukocyte specific transcript 1
OGT	O-linked N-acetylglucosamine (GlcNAc) transferase (UDP-N-acetylglucosamine:polypeptide-N-acetylglucosaminyl transferase)
CSNK1G3	casein kinase 1, gamma 3
PAM	peptidylglycine alpha-amidating monooxygenase
GCNT1	glucosaminyl (N-acetyl) transferase 1, core 2 (beta-1,6-N-acetylglucosaminyltransferase)
ATG12	ATG12 autophagy related 12 homolog (S. cerevisiae)
ALK	anaplastic lymphoma kinase (Ki-1)
FUT4	fucosyltransferase 4 (alpha (1,3) fucosyltransferase, myeloid-specific)
ARAF	v-raf murine sarcoma 3611 viral oncogene homolog
PRKDC	protein kinase, DNA-activated, catalytic polypeptide
YES1	v-yes-1 Yamaguchi sarcoma viral oncogene homolog 1
NFAM1	NFAT activating protein with ITAM motif 1
CD79A	CD79a molecule, immunoglobulin-associated alpha
TRAT1	T cell receptor associated transmembrane adaptor 1
CHEK1	CHK1 checkpoint homolog (S. pombe)
CDK5R1	cyclin-dependent kinase 5, regulatory subunit 1 (p35)
HEXIM2	hexamthylene bis-acetamide inducible 2
CDK5RAP1	CDK5 regulatory subunit associated protein 1
PKMYT1	protein kinase, membrane associated tyrosine/threonine 1
CDKN3	cyclin-dependent kinase inhibitor 3 (CDK2-associated dual specificity phosphatase)
MNAT1	menage a trois homolog 1, cyclin H assembly factor (Xenopus laevis)
CDK7	cyclin-dependent kinase 7 (MO15 homolog, Xenopus laevis, cdk-activating kinase)
CDC25A	cell division cycle 25A
CKS1B	CDC28 protein kinase regulatory subunit 1B
CKS2	CDC28 protein kinase regulatory subunit 2
GTF2H1	general transcription factor IIH, polypeptide 1, 62kDa
CDC37	CDC37 cell division cycle 37 homolog (S. cerevisiae)
CDK5R2	cyclin-dependent kinase 5, regulatory subunit 2 (p39)
PYDC1	PYD (pyrin domain) containing 1
SFN	stratifin
GAP43	growth associated protein 43
MAP2K3	mitogen-activated protein kinase kinase 3
RASA1	RAS p21 protein activator (GTPase activating protein) 1
MAPT	microtubule-associated protein tau
TPPP	-
NCR1	natural cytotoxicity triggering receptor 1
SSB	Sjogren syndrome antigen B (autoantigen La)
PREX1	-
WASF1	WAS protein family, member 1
CDK2	cyclin-dependent kinase 2
NBN	nibrin
ATR	ataxia telangiectasia and Rad3 related
S100A11	S100 calcium binding protein A11
GLI2	GLI-Kruppel family member GLI2
CDT1	chromatin licensing and DNA replication factor 1
KHDRBS1	KH domain containing, RNA binding, signal transduction associated 1
BIRC5	baculoviral IAP repeat-containing 5 (survivin)
ANAPC5	anaphase promoting complex subunit 5
WASL	Wiskott-Aldrich syndrome-like
WIPF1	WAS/WASL interacting protein family, member 1
EVL	Enah/Vasp-like
IL2	interleukin 2
CD2	CD2 molecule
RHOG	ras homolog gene family, member G (rho G)
IL6	interleukin 6 (interferon, beta 2)
IL15	interleukin 15
CCKBR	cholecystokinin B receptor
IL12RB2	interleukin 12 receptor, beta 2
MST1R	macrophage stimulating 1 receptor (c-met-related tyrosine kinase)
LIF	leukemia inhibitory factor (cholinergic differentiation factor)
CDC7	CDC7 cell division cycle 7 (S. cerevisiae)
TBRG4	transforming growth factor beta regulator 4
CDC25B	cell division cycle 25B
CD86	CD86 molecule
CSF1	colony stimulating factor 1 (macrophage)
CTF1	cardiotrophin 1
FLT1	fms-related tyrosine kinase 1 (vascular endothelial growth factor/vascular permeability factor receptor)
BTC	betacellulin
HOXC10	homeobox C10
SLAMF1	signaling lymphocytic activation molecule family member 1
VCL	vinculin
GJA5	gap junction protein, alpha 5, 40kDa (connexin 40)
TLN1	talin 1
PARD6A	par-6 partitioning defective 6 homolog alpha (C.elegans)
ITGA6	integrin, alpha 6
IL2RB	interleukin 2 receptor, beta
PDC	phosducin
FARP2	FERM, RhoGEF and pleckstrin domain protein 2
ABRA	actin-binding Rho activating protein
FGD6	FYVE, RhoGEF and PH domain containing 6
RTKN	rhotekin
ARHGAP1	Rho GTPase activating protein 1
ARHGAP5	Rho GTPase activating protein 5
RHOD	ras homolog gene family, member D
PLD1	phospholipase D1, phosphatidylcholine-specific
GRAP	GRB2-related adaptor protein
RASGRP1	RAS guanyl releasing protein 1 (calcium and DAG-regulated)
RRAS	related RAS viral (r-ras) oncogene homolog
DOCK1	dedicator of cytokinesis 1
RGS19	regulator of G-protein signalling 19
PLD2	phospholipase D2
ABR	active BCR-related gene
RRAD	Ras-related associated with diabetes
ATM	ataxia telangiectasia mutated (includes complementation groups A, C and D)
GPX1	glutathione peroxidase 1
STMN1	stathmin 1/oncoprotein 18
PAFAH1B1	platelet-activating factor acetylhydrolase, isoform Ib, alpha subunit 45kDa
EEF1E1	eukaryotic translation elongation factor 1 epsilon 1
BID	BH3 interacting domain death agonist
DNM1L	dynamin 1-like
PPP1R12B	protein phosphatase 1, regulatory (inhibitor) subunit 12B
NCKIPSD	NCK interacting protein with SH3 domain
PTAFR	platelet-activating factor receptor
IL7R	interleukin 7 receptor
MS4A2	membrane-spanning 4-domains, subfamily A, member 2 (Fc fragment of IgE, high affinity I, receptor for; beta polypeptide)
CCR5	chemokine (C-C motif) receptor 5
LILRB2	leukocyte immunoglobulin-like receptor, subfamily B (with TM and ITIM domains), member 2
IL2RA	interleukin 2 receptor, alpha
IL6R	interleukin 6 receptor
IL27RA	interleukin 27 receptor, alpha
IL6ST	interleukin 6 signal transducer (gp130, oncostatin M receptor)
TNFRSF14	tumor necrosis factor receptor superfamily, member 14 (herpesvirus entry mediator)
FCGR1A	Fc fragment of IgG, high affinity Ia, receptor (CD64)
FCGR2B	Fc fragment of IgG, low affinity IIb, receptor (CD32)
IL4R	interleukin 4 receptor
GRM5	glutamate receptor, metabotropic 5
GRIN2A	glutamate receptor, ionotropic, N-methyl D-aspartate 2A
GRIN2B	glutamate receptor, ionotropic, N-methyl D-aspartate 2B
GRIA4	glutamate receptor, ionotrophic, AMPA 4
PLCB2	phospholipase C, beta 2
IFNB1	interferon, beta 1, fibroblast
AVPR2	arginine vasopressin receptor 2 (nephrogenic diabetes insipidus)
CAP1	CAP, adenylate cyclase-associated protein 1 (yeast)
ADCY7	adenylate cyclase 7
CCR3	chemokine (C-C motif) receptor 3
AGTR1	angiotensin II receptor, type 1
HTR1F	5-hydroxytryptamine (serotonin) receptor 1F
LEPR	leptin receptor
CD19	CD19 molecule
DTX1	deltex homolog 1 (Drosophila)
RGS16	regulator of G-protein signalling 16
GIT2	G protein-coupled receptor kinase interactor 2
IFNA2	interferon, alpha 2
SCTR	secretin receptor
MPL	myeloproliferative leukemia virus oncogene
OSMR	oncostatin M receptor
PDGFRA	platelet-derived growth factor receptor, alpha polypeptide
CASR	calcium-sensing receptor (hypocalciuric hypercalcemia 1, severe neonatal hyperparathyroidism)
HRAS	v-Ha-ras Harvey rat sarcoma viral oncogene homolog
DRD4	dopamine receptor D4
GABRB2	gamma-aminobutyric acid (GABA) A receptor, beta 2
GABRR1	gamma-aminobutyric acid (GABA) receptor, rho 1
ARHGEF11	Rho guanine nucleotide exchange factor (GEF) 11
TRPV1	transient receptor potential cation channel, subfamily V, member 1
RRH	retinal pigment epithelium-derived rhodopsin homolog
AKAP12	A kinase (PRKA) anchor protein (gravin) 12
CCR10	chemokine (C-C motif) receptor 10
GABRA1	gamma-aminobutyric acid (GABA) A receptor, alpha 1
GABRA3	gamma-aminobutyric acid (GABA) A receptor, alpha 3
GABRA4	gamma-aminobutyric acid (GABA) A receptor, alpha 4
GABRG2	gamma-aminobutyric acid (GABA) A receptor, gamma 2
PIK3CG	phosphoinositide-3-kinase, catalytic, gamma polypeptide
CLEC4A	C-type lectin domain family 4, member A
DOK2	docking protein 2, 56kDa
KLRA1	killer cell lectin-like receptor subfamily A, member 1
KLRB1	killer cell lectin-like receptor subfamily B, member 1
KLRC1	killer cell lectin-like receptor subfamily C, member 1
LIFR	leukemia inhibitory factor receptor alpha
LY6E	lymphocyte antigen 6 complex, locus E
PTK2	PTK2 protein tyrosine kinase 2
FOXL2	forkhead box L2
CASP9	caspase 9, apoptosis-related cysteine peptidase
MCL1	myeloid cell leukemia sequence 1 (BCL2-related)
TYROBP	TYRO protein tyrosine kinase binding protein
ANP32A	acidic (leucine-rich) nuclear phosphoprotein 32 family, member A
PDIA2	protein disulfide isomerase family A, member 2
BAD	BCL2-antagonist of cell death
PRKAR1A	protein kinase, cAMP-dependent, regulatory, type I, alpha (tissue specific extinguisher 1)
GUCY1B3	guanylate cyclase 1, soluble, beta 3
CARHSP1	calcium regulated heat stable protein 1, 24kDa
DGKA	diacylglycerol kinase, alpha 80kDa
EFS	embryonal Fyn-associated substrate
FER	fer (fps/fes related) tyrosine kinase (phosphoprotein NCP94)
PAG1	phosphoprotein associated with glycosphingolipid microdomains 1
SH2B2	SH2B adaptor protein 2
TIE1	tyrosine kinase with immunoglobulin-like and EGF-like domains 1
FAS	Fas (TNF receptor superfamily, member 6)
FGF12	fibroblast growth factor 12
CRK	v-crk sarcoma virus CT10 oncogene homolog (avian)
SKAP2	src kinase associated phosphoprotein 2
BCAR3	breast cancer anti-estrogen resistance 3
DPYSL5	dihydropyrimidinase-like 5
FEZ2	fasciculation and elongation protein zeta 2 (zygin II)
DLC1	deleted in liver cancer 1
PECAM1	platelet/endothelial cell adhesion molecule (CD31 antigen)
IFNGR1	interferon gamma receptor 1
MAPK1	mitogen-activated protein kinase 1
MX1	myxovirus (influenza virus) resistance 1, interferon-inducible protein p78 (mouse)
TLR2	toll-like receptor 2
EXT1	exostoses (multiple) 1
CD33	CD33 molecule
TXN	thioredoxin
CSF1R	colony stimulating factor 1 receptor, formerly McDonough feline sarcoma viral (v-fms) oncogene homolog
ERBB4	v-erb-a erythroblastic leukemia viral oncogene homolog 4 (avian)
IL15RA	interleukin 15 receptor, alpha
IL5RA	interleukin 5 receptor, alpha
IL9R	interleukin 9 receptor
ZNF259	zinc finger protein 259
MAP2K1	mitogen-activated protein kinase kinase 1
RPS6KA3	ribosomal protein S6 kinase, 90kDa, polypeptide 3
RPS6KA6	ribosomal protein S6 kinase, 90kDa, polypeptide 6
SH3GL2	SH3-domain GRB2-like 2
SH3GL3	SH3-domain GRB2-like 3
GABRR2	gamma-aminobutyric acid (GABA) receptor, rho 2
NTF3	neurotrophin 3
WNT5A	wingless-type MMTV integration site family, member 5A
MLLT4	myeloid/lymphoid or mixed-lineage leukemia (trithorax homolog, Drosophila); translocated to, 4
DEK	DEK oncogene (DNA binding)
CSNK2A2	casein kinase 2, alpha prime polypeptide
EXT2	exostoses (multiple) 2
EPHB1	EPH receptor B1
NRGN	neurogranin (protein kinase C substrate, RC3)
RPS6KB2	ribosomal protein S6 kinase, 70kDa, polypeptide 2
ELK3	ELK3, ETS-domain protein (SRF accessory protein 2)
MAPKAPK3	mitogen-activated protein kinase-activated protein kinase 3
CLIC3	chloride intracellular channel 3
CHRND	cholinergic receptor, nicotinic, delta
EPHA2	EPH receptor A2
LETM1	leucine zipper-EF-hand containing transmembrane protein 1
CREM	cAMP responsive element modulator
IGSF1	immunoglobulin superfamily, member 1
ADRBK1	adrenergic, beta, receptor kinase 1
ADRBK2	adrenergic, beta, receptor kinase 2
ALCAM	activated leukocyte cell adhesion molecule
ARHGEF7	Rho guanine nucleotide exchange factor (GEF) 7
AXL	AXL receptor tyrosine kinase
CD226	CD226 molecule
CNTNAP1	contactin associated protein 1
CREB1	cAMP responsive element binding protein 1
CSNK2B	casein kinase 2, beta polypeptide
CTNND2	catenin (cadherin-associated protein), delta 2 (neural plakophilin-related arm-repeat protein)
DAPP1	dual adaptor of phosphotyrosine and 3-phosphoinositides
EPHA1	EPH receptor A1
EPHA3	EPH receptor A3
EPHA4	EPH receptor A4
EPHB3	EPH receptor B3
GRB14	growth factor receptor-bound protein 14
INPP4A	inositol polyphosphate-4-phosphatase, type I, 107kDa
INPP5D	inositol polyphosphate-5-phosphatase, 145kDa
ITPKA	inositol 1,4,5-trisphosphate 3-kinase A
ITPKB	inositol 1,4,5-trisphosphate 3-kinase B
ITPR2	inositol 1,4,5-triphosphate receptor, type 2
ITPR3	inositol 1,4,5-triphosphate receptor, type 3
KIT	v-kit Hardy-Zuckerman 4 feline sarcoma viral oncogene homolog
LILRB4	leukocyte immunoglobulin-like receptor, subfamily B (with TM and ITIM domains), member 4
MAP2K5	mitogen-activated protein kinase kinase 5
MAPKAPK5	mitogen-activated protein kinase-activated protein kinase 5
NEDD9	neural precursor cell expressed, developmentally down-regulated 9
NRG2	neuregulin 2
P2RX7	purinergic receptor P2X, ligand-gated ion channel, 7
PAK4	p21(CDKN1A)-activated kinase 4
PDE4A	phosphodiesterase 4A, cAMP-specific (phosphodiesterase E2 dunce homolog, Drosophila)
PDGFRB	platelet-derived growth factor receptor, beta polypeptide
PILRA	paired immunoglobin-like type 2 receptor alpha
PPP1R1B	protein phosphatase 1, regulatory (inhibitor) subunit 1B (dopamine and cAMP regulated phosphoprotein, DARPP-32)
PRKAB2	protein kinase, AMP-activated, beta 2 non-catalytic subunit
PTPN1	protein tyrosine phosphatase, non-receptor type 1
PTPN11	protein tyrosine phosphatase, non-receptor type 11 (Noonan syndrome 1)
RAP1GAP	RAP1 GTPase activating protein
RHEB	Ras homolog enriched in brain
RIN1	Ras and Rab interactor 1
ROS1	v-ros UR2 sarcoma virus oncogene homolog 1 (avian)
RPS6KA1	ribosomal protein S6 kinase, 90kDa, polypeptide 1
RPS6KB1	ribosomal protein S6 kinase, 70kDa, polypeptide 1
SH3BP2	SH3-domain binding protein 2
SHB	Src homology 2 domain containing adaptor protein B
STAM	signal transducing adaptor molecule (SH3 domain and ITAM motif) 1
TANK	TRAF family member-associated NFKB activator
TYRO3	TYRO3 protein tyrosine kinase
ATP2A1	ATPase, Ca++ transporting, cardiac muscle, fast twitch 1
PITPNM1	phosphatidylinositol transfer protein, membrane-associated 1
TRPC3	transient receptor potential cation channel, subfamily C, member 3
UNC119	unc-119 homolog (C. elegans)
NEBL	nebulette
KATNB1	katanin p80 (WD repeat containing) subunit B 1
XPO6	exportin 6
BUB1	BUB1 budding uninhibited by benzimidazoles 1 homolog (yeast)
PIN1	protein (peptidylprolyl cis/trans isomerase) NIMA-interacting 1
DOCK2	dedicator of cytokinesis 2
SYK	spleen tyrosine kinase
CD34	CD34 molecule
TNNT2	troponin T type 2 (cardiac)
INHBB	inhibin, beta B (activin AB beta polypeptide)
OSM	oncostatin M
SNAP25	synaptosomal-associated protein, 25kDa
STX1A	syntaxin 1A (brain)
APBB2	amyloid beta (A4) precursor protein-binding, family B, member 2 (Fe65-like)
CENPF	centromere protein F, 350/400ka (mitosin)
CETN1	centrin, EF-hand protein, 1
CDC27	cell division cycle 27
PLK1	polo-like kinase 1 (Drosophila)
CIT	citron (rho-interacting, serine/threonine kinase 21)
KIF22	kinesin family member 22
PRC1	protein regulator of cytokinesis 1
CACNA1F	calcium channel, voltage-dependent, alpha 1F subunit
MYL2	myosin, light chain 2, regulatory, cardiac, slow
KCNB2	potassium voltage-gated channel, Shab-related subfamily, member 2
CNN1	calponin 1, basic, smooth muscle
LIG3	ligase III, DNA, ATP-dependent
RAD51L1	RAD51-like 1 (S. cerevisiae)
CCNA1	cyclin A1
BRCA2	breast cancer 2, early onset
NDE1	nudE nuclear distribution gene E homolog 1 (A. nidulans)
CKAP5	cytoskeleton associated protein 5
NUP107	nucleoporin 107kDa
NUP133	nucleoporin 133kDa
RAE1	RAE1 RNA export 1 homolog (S. pombe)
CBLB	Cas-Br-M (murine) ecotropic retroviral transforming sequence b
KPNA6	karyopherin alpha 6 (importin alpha 7)
NRCAM	neuronal cell adhesion molecule
ADAM12	ADAM metallopeptidase domain 12 (meltrin alpha)
BCL2	B-cell CLL/lymphoma 2
SEMA4D	sema domain, immunoglobulin domain (Ig), transmembrane domain (TM) and short cytoplasmic domain, (semaphorin) 4D
DMBT1	deleted in malignant brain tumors 1
BST1	bone marrow stromal cell antigen 1
RAG1	recombination activating gene 1
WAS	Wiskott-Aldrich syndrome (eczema-thrombocytopenia)
MBP	myelin basic protein
TNFAIP1	tumor necrosis factor, alpha-induced protein 1 (endothelial)
CD97	CD97 molecule
CD22	CD22 molecule
CD79B	CD79b molecule, immunoglobulin-associated beta
CTLA4	cytotoxic T-lymphocyte-associated protein 4
FCAR	Fc fragment of IgA, receptor for
FCGR3A	Fc fragment of IgG, low affinity IIIa, receptor (CD16a)
IL16	interleukin 16 (lymphocyte chemoattractant factor)
IL2RG	interleukin 2 receptor, gamma (severe combined immunodeficiency)
KIR2DL3	killer cell immunoglobulin-like receptor, two domains, long cytoplasmic tail, 3
MS4A1	membrane-spanning 4-domains, subfamily A, member 1
SEMA7A	semaphorin 7A, GPI membrane anchor (John Milton Hagen blood group)
LIG1	ligase I, DNA, ATP-dependent
PRKCQ	protein kinase C, theta
ERCC4	excision repair cross-complementing rodent repair deficiency, complementation group 4
ERCC2	excision repair cross-complementing rodent repair deficiency, complementation group 2 (xeroderma pigmentosum D)
GTF2H2	general transcription factor IIH, polypeptide 2, 44kDa
SHROOM2	shroom family member 2
SNAP23	synaptosomal-associated protein, 23kDa
CDK5	cyclin-dependent kinase 5
DVL2	dishevelled, dsh homolog 2 (Drosophila)
RTN4	reticulon 4
ROBO1	roundabout, axon guidance receptor, homolog 1 (Drosophila)
SERPINF1	serpin peptidase inhibitor, clade F (alpha-2 antiplasmin, pigment epithelium derived factor), member 1
CASQ2	calsequestrin 2 (cardiac muscle)
ALDOA	aldolase A, fructose-bisphosphate
SLC7A5	solute carrier family 7 (cationic amino acid transporter, y+ system), member 5
SLC7A8	solute carrier family 7 (cationic amino acid transporter, y+ system), member 8
SLC7A10	solute carrier family 7, (neutral amino acid transporter, y+ system) member 10
EIF2B5	eukaryotic translation initiation factor 2B, subunit 5 epsilon, 82kDa
EIF2B3	eukaryotic translation initiation factor 2B, subunit 3 gamma, 58kDa
RBBP8	retinoblastoma binding protein 8
FANCG	Fanconi anemia, complementation group G
RNF7	ring finger protein 7
PEA15	phosphoprotein enriched in astrocytes 15
SNCA	synuclein, alpha (non A4 component of amyloid precursor)
IER3	immediate early response 3
PAX7	paired box gene 7
AATF	apoptosis antagonizing transcription factor
BCL2A1	BCL2-related protein A1
BNIP2	BCL2/adenovirus E1B 19kDa interacting protein 2
MYO18A	myosin XVIIIA
PIK3R2	phosphoinositide-3-kinase, regulatory subunit 2 (p85 beta)
TLR9	toll-like receptor 9
AURKAIP1	aurora kinase A interacting protein 1
IFNW1	interferon, omega 1
CDC42EP4	CDC42 effector protein (Rho GTPase binding) 4
RAB35	RAB35, member RAS oncogene family
ID2	inhibitor of DNA binding 2, dominant negative helix-loop-helix protein
LEP	leptin (obesity homolog, mouse)
GFPT1	glutamine-fructose-6-phosphate transaminase 1
LIG4	ligase IV, DNA, ATP-dependent
NIN	ninein (GSK3B interacting protein)
POLL	polymerase (DNA directed), lambda
PEX13	peroxisome biogenesis factor 13
MCM2	MCM2 minichromosome maintenance deficient 2, mitotin (S. cerevisiae)
EGFL6	EGF-like-domain, multiple 6
USP16	ubiquitin specific peptidase 16
MAFA	v-maf musculoaponeurotic fibrosarcoma oncogene homolog A (avian)
SLC1A3	solute carrier family 1 (glial high affinity glutamate transporter), member 3
SLC3A1	solute carrier family 3 (cystine, dibasic and neutral amino acid transporters, activator of cystine, dibasic and neutral amino acid transport), member 1
SLC3A2	solute carrier family 3 (activators of dibasic and neutral amino acid transport), member 2
CD38	CD38 molecule
PRKCA	protein kinase C, alpha
DVL3	dishevelled, dsh homolog 3 (Drosophila)
HAND1	heart and neural crest derivatives expressed 1
HAND2	heart and neural crest derivatives expressed 2
PER1	period homolog 1 (Drosophila)
CRY1	cryptochrome 1 (photolyase-like)
PER2	period homolog 2 (Drosophila)
GCLM	glutamate-cysteine ligase, modifier subunit
GAD2	glutamate decarboxylase 2 (pancreatic islets and brain, 65kDa)
MYO1E	myosin IE
EPB49	erythrocyte membrane protein band 4.9 (dematin)
ARHGEF17	Rho guanine nucleotide exchange factor (GEF) 17
RND3	Rho family GTPase 3
VIL1	villin 1
SLC22A3	solute carrier family 22 (extraneuronal monoamine transporter), member 3
SLC18A2	solute carrier family 18 (vesicular monoamine), member 2
RIMS1	regulating synaptic membrane exocytosis 1
SUPT4H1	suppressor of Ty 4 homolog 1 (S. cerevisiae)
ITK	IL2-inducible T-cell kinase
LSP1	lymphocyte-specific protein 1
MNDA	myeloid cell nuclear differentiation antigen
NCF1	neutrophil cytosolic factor 1, (chronic granulomatous disease, autosomal 1)
ABAT	4-aminobutyrate aminotransferase
PKD1	polycystic kidney disease 1 (autosomal dominant)
CDH5	cadherin 5, type 2, VE-cadherin (vascular epithelium)
CD2AP	CD2-associated protein
FANCA	Fanconi anemia, complementation group A
MUC20	mucin 20, cell surface associated
PICALM	phosphatidylinositol binding clathrin assembly protein
SLC7A7	solute carrier family 7 (cationic amino acid transporter, y+ system), member 7
DAG1	dystroglycan 1 (dystrophin-associated glycoprotein 1)
OCLN	occludin
BAAT	bile acid Coenzyme A: amino acid N-acyltransferase (glycine N-choloyltransferase)
ACOX3	acyl-Coenzyme A oxidase 3, pristanoyl
PFKM	phosphofructokinase, muscle
KCNE1	potassium voltage-gated channel, Isk-related family, member 1
TPR	translocated promoter region (to activated MET oncogene)
UGP2	UDP-glucose pyrophosphorylase 2
PDK2	pyruvate dehydrogenase kinase, isozyme 2
PDK3	pyruvate dehydrogenase kinase, isozyme 3
HMGCR	3-hydroxy-3-methylglutaryl-Coenzyme A reductase
ENPP1	ectonucleotide pyrophosphatase/phosphodiesterase 1
TULP4	tubby like protein 4
TNNI3	troponin I type 3 (cardiac)
GNS	glucosamine (N-acetyl)-6-sulfatase (Sanfilippo disease IIID)
GUSB	glucuronidase, beta
ZP2	zona pellucida glycoprotein 2 (sperm receptor)
IRF7	interferon regulatory factor 7
TIAL1	TIA1 cytotoxic granule-associated RNA binding protein-like 1
BCL2L11	BCL2-like 11 (apoptosis facilitator)
WRN	Werner syndrome
SLC2A2	solute carrier family 2 (facilitated glucose transporter), member 2
SLC5A1	solute carrier family 5 (sodium/glucose cotransporter), member 1
SCAMP3	secretory carrier membrane protein 3
DYNC1I1	dynein, cytoplasmic 1, intermediate chain 1
KCNJ1	potassium inwardly-rectifying channel, subfamily J, member 1
AQP4	aquaporin 4
AQP1	aquaporin 1 (Colton blood group)
AQP3	aquaporin 3 (Gill blood group)
EIF4B	eukaryotic translation initiation factor 4B
EIF5	eukaryotic translation initiation factor 5
MTIF2	mitochondrial translational initiation factor 2
PEX19	peroxisomal biogenesis factor 19
LASP1	LIM and SH3 protein 1
ANK3	ankyrin 3, node of Ranvier (ankyrin G)
CNN2	calponin 2
CAV1	caveolin 1, caveolae protein, 22kDa
CHST1	carbohydrate (keratan sulfate Gal-6) sulfotransferase 1
ZFP36	zinc finger protein 36, C3H type, homolog (mouse)
PPP1R8	protein phosphatase 1, regulatory (inhibitor) subunit 8
TOB2	transducer of ERBB2, 2
SPEG	SPEG complex locus
TGFB1I1	transforming growth factor beta 1 induced transcript 1
RARRES3	retinoic acid receptor responder (tazarotene induced) 3
TUSC2	tumor suppressor candidate 2
TSPY1	testis specific protein, Y-linked 1
EPHB4	EPH receptor B4
ERF	Ets2 repressor factor
EVI5	ecotropic viral integration site 5
ARHGEF1	Rho guanine nucleotide exchange factor (GEF) 1
BIN1	bridging integrator 1
CDK3	cyclin-dependent kinase 3
CLK1	CDC-like kinase 1
E4F1	E4F transcription factor 1
MKI67	antigen identified by monoclonal antibody Ki-67
PRG4	proteoglycan 4
PIK3C2A	phosphoinositide-3-kinase, class 2, alpha polypeptide
PITPNM3	PITPNM family member 3
GHR	growth hormone receptor
GSTZ1	glutathione transferase zeta 1 (maleylacetoacetate isomerase)
GTF2H4	general transcription factor IIH, polypeptide 4, 52kDa
HSP90AB1	heat shock protein 90kDa alpha (cytosolic), class B member 1
CACNB2	calcium channel, voltage-dependent, beta 2 subunit
MYF5	myogenic factor 5
ADK	adenosine kinase
SNAPC3	small nuclear RNA activating complex, polypeptide 3, 50kDa
GTF3A	general transcription factor IIIA
PAX3	paired box gene 3 (Waardenburg syndrome 1)
DDX41	DEAD (Asp-Glu-Ala-Asp) box polypeptide 41
BMF	Bcl2 modifying factor
CCNH	cyclin H
ELK1	ELK1, member of ETS oncogene family
UTF1	undifferentiated embryonic cell transcription factor 1
PLAUR	plasminogen activator, urokinase receptor
E2F2	E2F transcription factor 2
SUV39H2	suppressor of variegation 3-9 homolog 2 (Drosophila)
PCYT1B	phosphate cytidylyltransferase 1, choline, beta
CD55	CD55 molecule, decay accelerating factor for complement (Cromer blood group)
MT2A	metallothionein 2A
AFF2	AF4/FMR2 family, member 2
DUSP1	dual specificity phosphatase 1
FOLR1	folate receptor 1 (adult)
AMPH	amphiphysin (Stiff-Man syndrome with breast cancer 128kDa autoantigen)
ITSN1	intersectin 1 (SH3 domain protein)
RAB5A	RAB5A, member RAS oncogene family
SNX1	sorting nexin 1
SNX2	sorting nexin 2
SNX3	sorting nexin 3
SYNJ1	synaptojanin 1
PLSCR1	phospholipid scramblase 1
PTS	6-pyruvoyltetrahydropterin synthase
NAP1L4	nucleosome assembly protein 1-like 4
DCX	doublecortex; lissencephaly, X-linked (doublecortin)
POU3F3	POU domain, class 3, transcription factor 3
SLCO2A1	solute carrier organic anion transporter family, member 2A1
POLD2	polymerase (DNA directed), delta 2, regulatory subunit 50kDa
MEP1B	meprin A, beta
ADAM15	ADAM metallopeptidase domain 15 (metargidin)
USP39	ubiquitin specific peptidase 39
KCNQ2	potassium voltage-gated channel, KQT-like subfamily, member 2
KCNN1	potassium intermediate/small conductance calcium-activated channel, subfamily N, member 1
DOC2A	double C2-like domains, alpha
KCNQ5	potassium voltage-gated channel, KQT-like subfamily, member 5
RAPSN	receptor-associated protein of the synapse, 43kD
SLC6A5	solute carrier family 6 (neurotransmitter transporter, glycine), member 5
SYN1	synapsin I
SYN2	synapsin II
GJB1	gap junction protein, beta 1, 32kDa (connexin 32, Charcot-Marie-Tooth neuropathy, X-linked)
EFNA5	ephrin-A5
SPRY2	sprouty homolog 2 (Drosophila)
GJB2	gap junction protein, beta 2, 26kDa (connexin 26)
GJA3	gap junction protein, alpha 3, 46kDa (connexin 46)
EFNB2	ephrin-B2
ADAM17	ADAM metallopeptidase domain 17 (tumor necrosis factor, alpha, converting enzyme)
EFNA1	ephrin-A1
EFNA2	ephrin-A2
EFNA3	ephrin-A3
EFNA4	ephrin-A4
EFNB1	ephrin-B1
SH2D1A	SH2 domain protein 1A, Duncan's disease (lymphoproliferative syndrome)
SIGLEC6	sialic acid binding Ig-like lectin 6
KCNA2	potassium voltage-gated channel, shaker-related subfamily, member 2
CREB5	cAMP responsive element binding protein 5
ITCH	itchy homolog E3 ubiquitin protein ligase (mouse)
ACTN4	actinin, alpha 4
F2RL2	coagulation factor II (thrombin) receptor-like 2
GP9	glycoprotein IX (platelet)
DCK	deoxycytidine kinase
TOR1A	torsin family 1, member A (torsin A)
ADAM28	ADAM metallopeptidase domain 28
FOXJ1	forkhead box J1
HIST1H1T	histone cluster 1, H1t
USP9Y	ubiquitin specific peptidase 9, Y-linked (fat facets-like, Drosophila)
LGALS13	lectin, galactoside-binding, soluble, 13 (galectin 13)
SHOX	short stature homeobox
ANXA2	annexin A2
EXTL1	exostoses (multiple)-like 1
MEPE	matrix, extracellular phosphoglycoprotein with ASARM motif (bone)
SPAG1	sperm associated antigen 1
XKRY	XK, Kell blood group complex subunit-related, Y-linked
EMD	emerin (Emery-Dreifuss muscular dystrophy)
FHL3	four and a half LIM domains 3
NAGK	N-acetylglucosamine kinase
NFATC3	nuclear factor of activated T-cells, cytoplasmic, calcineurin-dependent 3
CRP	C-reactive protein, pentraxin-related
IL13	interleukin 13
SELE	selectin E (endothelial adhesion molecule 1)
CAMLG	calcium modulating ligand
CD48	CD48 molecule
CSF3R	colony stimulating factor 3 receptor (granulocyte)
PTPRCAP	protein tyrosine phosphatase, receptor type, C-associated protein
TPSAB1	tryptase alpha/beta 1
AVIL	advillin
BDNF	brain-derived neurotrophic factor
CNTFR	ciliary neurotrophic factor receptor
DSCAM	Down syndrome cell adhesion molecule
ENC1	ectodermal-neural cortex (with BTB-like domain)
HES1	hairy and enhancer of split 1, (Drosophila)
ITM2B	integral membrane protein 2B
PCDHA1	protocadherin alpha 1
PCDHA10	protocadherin alpha 10
PCDHA11	protocadherin alpha 11
PCDHA2	protocadherin alpha 2
PCDHA3	protocadherin alpha 3
PCDHA7	protocadherin alpha 7
PCDHA8	protocadherin alpha 8
FDPS	farnesyl diphosphate synthase (farnesyl pyrophosphate synthetase, dimethylallyltranstransferase, geranyltranstransferase)
HMGA2	high mobility group AT-hook 2
BLVRA	biliverdin reductase A
MGMT	O-6-methylguanine-DNA methyltransferase
NEU3	sialidase 3 (membrane sialidase)
DEGS1	degenerative spermatocyte homolog 1, lipid desaturase (Drosophila)
CYP4F2	cytochrome P450, family 4, subfamily F, polypeptide 2
SCN10A	sodium channel, voltage-gated, type X, alpha
NEDD4L	neural precursor cell expressed, developmentally down-regulated 4-like
SLC25A3	solute carrier family 25 (mitochondrial carrier; phosphate carrier), member 3
PHKA1	phosphorylase kinase, alpha 1 (muscle)
PHKG2	phosphorylase kinase, gamma 2 (testis)
PPP1R2	protein phosphatase 1, regulatory (inhibitor) subunit 2
KRT17	keratin 17
SEC24B	SEC24 related gene family, member B (S. cerevisiae)
EEF2K	eukaryotic elongation factor-2 kinase
RPL13	ribosomal protein L13
RPL41	ribosomal protein L41
CRYBB3	crystallin, beta B3
PDE6D	phosphodiesterase 6D, cGMP-specific, rod, delta
PDE6G	phosphodiesterase 6G, cGMP-specific, rod, gamma
PITPNA	phosphatidylinositol transfer protein, alpha
POU3F4	POU domain, class 3, transcription factor 4
TULP1	tubby like protein 1
SF3B4	splicing factor 3b, subunit 4, 49kDa
SYNCRIP	synaptotagmin binding, cytoplasmic RNA interacting protein
ZNF638	zinc finger protein 638
HCN4	hyperpolarization activated cyclic nucleotide-gated potassium channel 4
ID4	inhibitor of DNA binding 4, dominant negative helix-loop-helix protein
PCGF6	polycomb group ring finger 6
DTNBP1	dystrobrevin binding protein 1
GOLGB1	golgi autoantigen, golgin subfamily b, macrogolgin (with transmembrane signal), 1
ERRFI1	ERBB receptor feedback inhibitor 1
DKKL1	dickkopf-like 1 (soggy)
MCAM	melanoma cell adhesion molecule
TH	tyrosine hydroxylase
BRD7	bromodomain containing 7
FOXK2	forkhead box K2
MYCN	v-myc myelocytomatosis viral related oncogene, neuroblastoma derived (avian)
SPIB	Spi-B transcription factor (Spi-1/PU.1 related)
DYSF	dysferlin, limb girdle muscular dystrophy 2B (autosomal recessive)
NOS1	nitric oxide synthase 1 (neuronal)
PLXNA1	plexin A1
ZNF7	zinc finger protein 7
AFF4	AF4/FMR2 family, member 4
ETV1	ets variant gene 1
MLLT1	myeloid/lymphoid or mixed-lineage leukemia (trithorax homolog, Drosophila); translocated to, 1
TRIM29	tripartite motif-containing 29
CSF2RB	colony stimulating factor 2 receptor, beta, low-affinity (granulocyte-macrophage)
LIMS1	LIM and senescent cell antigen-like domains 1
FUBP3	far upstream element (FUSE) binding protein 3
SLC25A5	solute carrier family 25 (mitochondrial carrier; adenine nucleotide translocator), member 5
STX8	syntaxin 8
XK	X-linked Kx blood group (McLeod syndrome)
AAK1	AP2 associated kinase 1
AATK	apoptosis-associated tyrosine kinase
ABCG5	ATP-binding cassette, sub-family G (WHITE), member 5 (sterolin 1)
ACACB	acetyl-Coenzyme A carboxylase beta
ACP1	acid phosphatase 1, soluble
ACTB	actin, beta
ACTR1B	ARP1 actin-related protein 1 homolog B, centractin beta (yeast)
ADCK1	aarF domain containing kinase 1
ADCY5	adenylate cyclase 5
ADD2	adducin 2 (beta)
AGPAT4	1-acylglycerol-3-phosphate O-acyltransferase 4 (lysophosphatidic acid acyltransferase, delta)
AHRR	aryl-hydrocarbon receptor repressor
AIRE	autoimmune regulator (autoimmune polyendocrinopathy candidiasis ectodermal dystrophy)
AK1	adenylate kinase 1
AKAP14	A kinase (PRKA) anchor protein 14
AKAP2	A kinase (PRKA) anchor protein 2
AKAP6	A kinase (PRKA) anchor protein 6
ALOX5	arachidonate 5-lipoxygenase
ALS2CR7	amyotrophic lateral sclerosis 2 (juvenile) chromosome region, candidate 7
ANAPC7	anaphase promoting complex subunit 7
ANK2	ankyrin 2, neuronal
ANKS1A	ankyrin repeat and sterile alpha motif domain containing 1A
ANXA7	annexin A7
AP2A1	adaptor-related protein complex 2, alpha 1 subunit
AP2B1	adaptor-related protein complex 2, beta 1 subunit
APBB3	amyloid beta (A4) precursor protein-binding, family B, member 3
APLP2	amyloid beta (A4) precursor-like protein 2
APOL5	apolipoprotein L, 5
ARHGAP21	Rho GTPase activating protein 21
ARHGEF15	Rho guanine nucleotide exchange factor (GEF) 15
ARHGEF5	Rho guanine nucleotide exchange factor (GEF) 5
ARPC1B	actin related protein 2/3 complex, subunit 1B, 41kDa
ASB16	ankyrin repeat and SOCS box-containing 16
ASXL1	additional sex combs like 1 (Drosophila)
ATAD3B	ATPase family, AAA domain containing 3B
ATF1	activating transcription factor 1
ATF2	activating transcription factor 2
ATP1B1	ATPase, Na+/K+ transporting, beta 1 polypeptide
ATP2B1	ATPase, Ca++ transporting, plasma membrane 1
ATP5A1	ATP synthase, H+ transporting, mitochondrial F1 complex, alpha subunit 1, cardiac muscle
ATP5B	ATP synthase, H+ transporting, mitochondrial F1 complex, beta polypeptide
ATP5C1	ATP synthase, H+ transporting, mitochondrial F1 complex, gamma polypeptide 1
ATP5D	ATP synthase, H+ transporting, mitochondrial F1 complex, delta subunit
AZI2	5-azacytidine induced 2
BAG3	BCL2-associated athanogene 3
BAZ2A	bromodomain adjacent to zinc finger domain, 2A
BBS7	Bardet-Biedl syndrome 7
BDP1	B double prime 1, subunit of RNA polymerase III transcription initiation factor IIIB
BMP2K	BMP2 inducible kinase
BMP8B	bone morphogenetic protein 8b (osteogenic protein 2)
BRD3	bromodomain containing 3
BRD4	bromodomain containing 4
BRDG1	-
BTLA	B and T lymphocyte associated
BXDC1	brix domain containing 1
C1ORF61	chromosome 1 open reading frame 61
C20ORF46	chromosome 20 open reading frame 46
C2ORF44	chromosome 2 open reading frame 44
C6	complement component 6
CABC1	chaperone, ABC1 activity of bc1 complex homolog (S. pombe)
CABLES2	Cdk5 and Abl enzyme substrate 2
CABYR	calcium binding tyrosine-(Y)-phosphorylation regulated (fibrousheathin 2)
CAD	carbamoyl-phosphate synthetase 2, aspartate transcarbamylase, and dihydroorotase
CAMK2D	calcium/calmodulin-dependent protein kinase (CaM kinase) II delta
CAMK2N1	calcium/calmodulin-dependent protein kinase II inhibitor 1
CAMK2N2	calcium/calmodulin-dependent protein kinase II inhibitor 2
CAMKK1	calcium/calmodulin-dependent protein kinase kinase 1, alpha
CAPN2	calpain 2, (m/II) large subunit
CAST	calpastatin
CAT	catalase
CAV2	caveolin 2
CAV3	caveolin 3
CBR3	carbonyl reductase 3
CCDC6	coiled-coil domain containing 6
CCNB1IP1	cyclin B1 interacting protein 1
CCNB2	cyclin B2
CCNF	cyclin F
CCRK	cell cycle related kinase
CD163	CD163 molecule
CD247	CD247 molecule
CD5	CD5 molecule
CD58	CD58 molecule
CD6	CD6 molecule
CD72	CD72 molecule
CDC2	cell division cycle 2, G1 to S and G2 to M
CDC2L5	cell division cycle 2-like 5 (cholinesterase-related cell division controller)
CDC34	cell division cycle 34
CDC37L1	CDC37 cell division cycle 37 homolog (S. cerevisiae)-like 1
CDCA3	cell division cycle associated 3
CDCP1	CUB domain containing protein 1
CDH11	cadherin 11, type 2, OB-cadherin (osteoblast)
CDH2	cadherin 2, type 1, N-cadherin (neuronal)
CDH4	cadherin 4, type 1, R-cadherin (retinal)
CEACAM1	carcinoembryonic antigen-related cell adhesion molecule 1 (biliary glycoprotein)
CEACAM3	carcinoembryonic antigen-related cell adhesion molecule 3
CELSR2	cadherin, EGF LAG seven-pass G-type receptor 2 (flamingo homolog, Drosophila)
CELSR3	cadherin, EGF LAG seven-pass G-type receptor 3 (flamingo homolog, Drosophila)
CENPA	centromere protein A
CEP55	centrosomal protein 55kDa
CHAT	choline acetyltransferase
CHN1	chimerin (chimaerin) 1
CHN2	chimerin (chimaerin) 2
CHRFAM7A	CHRNA7 (cholinergic receptor, nicotinic, alpha 7, exons 5-10) and FAM7A (family with sequence similarity 7A, exons A-E) fusion
CISH	cytokine inducible SH2-containing protein
CKAP4	cytoskeleton-associated protein 4
CKM	creatine kinase, muscle
CLK2	CDC-like kinase 2
CLYBL	citrate lyase beta like
CMTM3	CKLF-like MARVEL transmembrane domain containing 3
CNIH4	cornichon homolog 4 (Drosophila)
CNN3	calponin 3, acidic
CNTF	ciliary neurotrophic factor
CNTN1	contactin 1
COX3	mitochondrially encoded cytochrome c oxidase III
CRIP2	cysteine-rich protein 2
CRKRS	Cdc2-related kinase, arginine/serine-rich
CSF2RA	colony stimulating factor 2 receptor, alpha, low-affinity (granulocyte-macrophage)
CSN3	casein kappa
CSNK1A1L	casein kinase 1, alpha 1-like
CSPG4	chondroitin sulfate proteoglycan 4 (melanoma-associated)
CTDSPL	CTD (carboxy-terminal domain, RNA polymerase II, polypeptide A) small phosphatase-like
CTNNA1	catenin (cadherin-associated protein), alpha 1, 102kDa
CTNND1	catenin (cadherin-associated protein), delta 1
CUGBP2	CUG triplet repeat, RNA binding protein 2
CXCR7	chemokine (C-X-C motif) receptor 7
DAB1	disabled homolog 1 (Drosophila)
DAB2IP	DAB2 interacting protein
DDR1	discoidin domain receptor family, member 1
DGKZ	diacylglycerol kinase, zeta 104kDa
DLGAP1	discs, large (Drosophila) homolog-associated protein 1
DLGAP2	discs, large (Drosophila) homolog-associated protein 2
DLGAP3	discs, large (Drosophila) homolog-associated protein 3
DLGAP4	discs, large (Drosophila) homolog-associated protein 4
DLX3	distal-less homeobox 3
DLX4	distal-less homeobox 4
DNAJC5	DnaJ (Hsp40) homolog, subfamily C, member 5
DNASE1L2	deoxyribonuclease I-like 2
DOC2B	double C2-like domains, beta
DOCK3	dedicator of cytokinesis 3
DOK3	docking protein 3
DOK5	docking protein 5
DPPA4	developmental pluripotency associated 4
DTX2	deltex homolog 2 (Drosophila)
DUSP14	dual specificity phosphatase 14
DUSP15	dual specificity phosphatase 15
DUSP19	dual specificity phosphatase 19
DUSP7	dual specificity phosphatase 7
DVL1L1	dishevelled, dsh homolog 1 (Drosophila)-like 1
EFHA1	EF-hand domain family, member A1
EIF2S2	eukaryotic translation initiation factor 2, subunit 2 beta, 38kDa
EIF4E	eukaryotic translation initiation factor 4E
EIF4EBP1	eukaryotic translation initiation factor 4E binding protein 1
EPHA7	EPH receptor A7
EPHB6	EPH receptor B6
EPO	erythropoietin
EPOR	erythropoietin receptor
EPX	eosinophil peroxidase
EXTL3	exostoses (multiple)-like 3
FABP4	fatty acid binding protein 4, adipocyte
FAM46C	family with sequence similarity 46, member C
FAM57A	family with sequence similarity 57, member A
FAM83A	family with sequence similarity 83, member A
FAM98B	family with sequence similarity 98, member B
FANCL	Fanconi anemia, complementation group L
FBXL12	F-box and leucine-rich repeat protein 12
FCER1G	Fc fragment of IgE, high affinity I, receptor for; gamma polypeptide
FCGR2A	Fc fragment of IgG, low affinity IIa, receptor (CD32)
FCGR2C	Fc fragment of IgG, low affinity IIb, receptor for (CD32)
FHL2	four and a half LIM domains 2
FKBP3	FK506 binding protein 3, 25kDa
FLNC	filamin C, gamma (actin binding protein 280)
FLOT1	flotillin 1
FMR1	fragile X mental retardation 1
FN3K	fructosamine 3 kinase
FOXM1	forkhead box M1
FRAP1	FK506 binding protein 12-rapamycin associated protein 1
FRAT1	frequently rearranged in advanced T-cell lymphomas
FRAT2	frequently rearranged in advanced T-cell lymphomas 2
FREQ	frequenin homolog (Drosophila)
FRYL	furry homolog-like (Drosophila)
FSD1	fibronectin type III and SPRY domain containing 1
G6PC	glucose-6-phosphatase, catalytic subunit
GAB2	GRB2-associated binding protein 2
GAB3	GRB2-associated binding protein 3
GAK	cyclin G associated kinase
GAPVD1	GTPase activating protein and VPS9 domains 1
GH2	growth hormone 2
GLRX	glutaredoxin (thioltransferase)
GLTSCR1	glioma tumor suppressor candidate region gene 1
GNB1L	guanine nucleotide binding protein (G protein), beta polypeptide 1-like
GOLPH2	golgi phosphoprotein 2
GORASP1	golgi reassembly stacking protein 1, 65kDa
GP1BB	glycoprotein Ib (platelet), beta polypeptide
GP2	glycoprotein 2 (zymogen granule membrane)
GPM6A	glycoprotein M6A
GPR63	G protein-coupled receptor 63
GPRIN2	G protein regulated inducer of neurite outgrowth 2
GRIN1	glutamate receptor, ionotropic, N-methyl D-aspartate 1
GRIN2D	glutamate receptor, ionotropic, N-methyl D-aspartate 2D
GRIN3A	glutamate receptor, ionotropic, N-methyl-D-aspartate 3A
GRIN3B	glutamate receptor, ionotropic, N-methyl-D-aspartate 3B
GRIP2	glutamate receptor interacting protein 2
GSK3A	glycogen synthase kinase 3 alpha
GSTM2	glutathione S-transferase M2 (muscle)
GTF2H3	general transcription factor IIH, polypeptide 3, 34kDa
GTF2H5	general transcription factor IIH, polypeptide 5
GYS1	glycogen synthase 1 (muscle)
HCST	hematopoietic cell signal transducer
HES5	hairy and enhancer of split 5 (Drosophila)
HES6	hairy and enhancer of split 6 (Drosophila)
HEXA	hexosaminidase A (alpha polypeptide)
HIBCH	3-hydroxyisobutyryl-Coenzyme A hydrolase
HIPK1	homeodomain interacting protein kinase 1
HIST1H1B	histone cluster 1, H1b
HIST1H1E	histone cluster 1, H1e
HIST1H2BE	histone cluster 1, H2be
HIST3H2BB	histone cluster 3, H2bb
HMGN1	high-mobility group nucleosome binding domain 1
HMGN2	high-mobility group nucleosomal binding domain 2
HMGN3	high mobility group nucleosomal binding domain 3
HMMR	hyaluronan-mediated motility receptor (RHAMM)
HOXC8	homeobox C8
HPS6	Hermansky-Pudlak syndrome 6
HRNR	hornerin
HSD17B4	hydroxysteroid (17-beta) dehydrogenase 4
HSPB2	heat shock 27kDa protein 2
HSPB8	heat shock 22kDa protein 8
HYAL2	hyaluronoglucosaminidase 2
ICA1	islet cell autoantigen 1, 69kDa
ICAM1	intercellular adhesion molecule 1 (CD54), human rhinovirus receptor
IFNA1	interferon, alpha 1
IFNA8	interferon, alpha 8
IGJ	immunoglobulin J polypeptide, linker protein for immunoglobulin alpha and mu polypeptides
IL11RA	interleukin 11 receptor, alpha
IL17RD	interleukin 17 receptor D
IL21R	interleukin 21 receptor
IL23R	interleukin 23 receptor
IL3RA	interleukin 3 receptor, alpha (low affinity)
INCA1	-
INHBC	inhibin, beta C
INPPL1	inositol polyphosphate phosphatase-like 1
INSL6	insulin-like 6
INSRR	insulin receptor-related receptor
ISG20L2	interferon stimulated exonuclease gene 20kDa-like 2
ITGAD	integrin, alpha D
ITGB4	integrin, beta 4
ITGB7	integrin, beta 7
ITPR1	inositol 1,4,5-triphosphate receptor, type 1
JAK1	Janus kinase 1 (a protein tyrosine kinase)
JUB	jub, ajuba homolog (Xenopus laevis)
KCNB1	potassium voltage-gated channel, Shab-related subfamily, member 1
KCNE4	potassium voltage-gated channel, Isk-related family, member 4
KCNH7	potassium voltage-gated channel, subfamily H (eag-related), member 7
KIAA0195	KIAA0195
KIAA0999	-
KIAA1166	KIAA1166
KIF13A	kinesin family member 13A
KIF14	kinesin family member 14
KIFC2	kinesin family member C2
KIR2DL5B	killer cell immunoglobulin-like receptor, two domains, long cytoplasmic tail, 5B
KIR3DL1	killer cell immunoglobulin-like receptor, three domains, long cytoplasmic tail, 1
KLHL1	kelch-like 1 (Drosophila)
KLK6	kallikrein 6 (neurosin, zyme)
KRT27	keratin 27
KRT74	keratin 74
KRTAP9-3	keratin associated protein 9-3
KSR2	kinase suppressor of ras 2
LAD1	ladinin 1
LAIR1	leukocyte-associated immunoglobulin-like receptor 1
LCP1	lymphocyte cytosolic protein 1 (L-plastin)
LDHB	lactate dehydrogenase B
LEPROT	leptin receptor overlapping transcript
LIME1	Lck interacting transmembrane adaptor 1
LIMK2	LIM domain kinase 2
LMNB1	lamin B1
LMNB2	lamin B2
LMOD1	leiomodin 1 (smooth muscle)
LRBA	LPS-responsive vesicle trafficking, beach and anchor containing
LRRC23	leucine rich repeat containing 23
LRRC41	leucine rich repeat containing 41
LRRC7	leucine rich repeat containing 7
LRRK1	leucine-rich repeat kinase 1
LSM14A	LSM14 homolog A (SCD6, S. cerevisiae)
LY6D	lymphocyte antigen 6 complex, locus D
LY9	lymphocyte antigen 9
LZTS1	leucine zipper, putative tumor suppressor 1
MAGEA12	melanoma antigen family A, 12
MALL	mal, T-cell differentiation protein-like
MAP2	microtubule-associated protein 2
MAP2K2	mitogen-activated protein kinase kinase 2
MAP3K1	mitogen-activated protein kinase kinase kinase 1
MAP4	microtubule-associated protein 4
MAPKBP1	mitogen activated protein kinase binding protein 1
MARCKS	myristoylated alanine-rich protein kinase C substrate
MARK3	MAP/microtubule affinity-regulating kinase 3
MCM4	MCM4 minichromosome maintenance deficient 4 (S. cerevisiae)
MELK	maternal embryonic leucine zipper kinase
MET	met proto-oncogene (hepatocyte growth factor receptor)
MICAL1	microtubule associated monoxygenase, calponin and LIM domain containing 1
MIP	major intrinsic protein of lens fiber
MOS	v-mos Moloney murine sarcoma viral oncogene homolog
MPDZ	multiple PDZ domain protein
MS4A3	membrane-spanning 4-domains, subfamily A, member 3 (hematopoietic cell-specific)
MUC1	mucin 1, cell surface associated
MUC4	mucin 4, cell surface associated
MYO18B	myosin XVIIIB
MYT1	myelin transcription factor 1
NANOS1	nanos homolog 1 (Drosophila)
NAP5	-
NCR3	natural cytotoxicity triggering receptor 3
ND2	mitochondrially encoded NADH dehydrogenase 2
NEFH	neurofilament, heavy polypeptide 200kDa
NEK3	NIMA (never in mitosis gene a)-related kinase 3
NEK8	NIMA (never in mitosis gene a)- related kinase 8
NES	nestin
NFASC	neurofascin homolog (chicken)
NGFR	nerve growth factor receptor (TNFR superfamily, member 16)
NKIRAS1	NFKB inhibitor interacting Ras-like 1
NOS3	nitric oxide synthase 3 (endothelial cell)
NQO2	NAD(P)H dehydrogenase, quinone 2
NR4A3	nuclear receptor subfamily 4, group A, member 3
NRAP	nebulin-related anchoring protein
NRG3	neuregulin 3
NRG4	neuregulin 4
NUP210	nucleoporin 210kDa
NXPH3	neurexophilin 3
OBFC2B	oligonucleotide/oligosaccharide-binding fold containing 2B
ODF2L	outer dense fiber of sperm tails 2-like
OGN	osteoglycin (osteoinductive factor, mimecan)
OPTC	opticin
P4HA3	procollagen-proline, 2-oxoglutarate 4-dioxygenase (proline 4-hydroxylase), alpha polypeptide III
PAK1IP1	PAK1 interacting protein 1
PAK3	p21 (CDKN1A)-activated kinase 3
PANX2	pannexin 2
PARVA	parvin, alpha
PCDHA12	protocadherin alpha 12
PCDHA9	protocadherin alpha 9
PDE3B	phosphodiesterase 3B, cGMP-inhibited
PDHA1	pyruvate dehydrogenase (lipoamide) alpha 1
PDLIM4	PDZ and LIM domain 4
PEAR1	-
PEBP1	phosphatidylethanolamine binding protein 1
PER3	period homolog 3 (Drosophila)
PFKFB2	6-phosphofructo-2-kinase/fructose-2,6-biphosphatase 2
PHACTR2	phosphatase and actin regulator 2
PHIP	pleckstrin homology domain interacting protein
PHKG1	phosphorylase kinase, gamma 1 (muscle)
PIGR	polymeric immunoglobulin receptor
PIK3AP1	phosphoinositide-3-kinase adaptor protein 1
PIK3C2B	phosphoinositide-3-kinase, class 2, beta polypeptide
PIK3CA	phosphoinositide-3-kinase, catalytic, alpha polypeptide
PIK3CD	phosphoinositide-3-kinase, catalytic, delta polypeptide
PILRB	paired immunoglobin-like type 2 receptor beta
PIP	prolactin-induced protein
PITPNM2	phosphatidylinositol transfer protein, membrane-associated 2
PKIA	protein kinase (cAMP-dependent, catalytic) inhibitor alpha
PKIG	protein kinase (cAMP-dependent, catalytic) inhibitor gamma
PKLR	pyruvate kinase, liver and RBC
PKP2	plakophilin 2
PKP3	plakophilin 3
PLCB4	phospholipase C, beta 4
PLCG1	phospholipase C, gamma 1
PLCG2	phospholipase C, gamma 2 (phosphatidylinositol-specific)
PLEK	pleckstrin
PLEKHB1	pleckstrin homology domain containing, family B (evectins) member 1
PLEKHJ1	pleckstrin homology domain containing, family J member 1
PLIN	perilipin
PLXNB1	plexin B1
PPFIA4	protein tyrosine phosphatase, receptor type, f polypeptide (PTPRF), interacting protein (liprin), alpha 4
PPM1F	protein phosphatase 1F (PP2C domain containing)
PPP1R14A	protein phosphatase 1, regulatory (inhibitor) subunit 14A
PPP1R3A	protein phosphatase 1, regulatory (inhibitor) subunit 3A (glycogen and sarcoplasmic reticulum binding subunit, skeletal muscle)
PPP1R3D	protein phosphatase 1, regulatory subunit 3D
PPP2R5A	protein phosphatase 2, regulatory subunit B (B56), alpha isoform
PPP2R5E	protein phosphatase 2, regulatory subunit B (B56), epsilon isoform
PPP3CB	protein phosphatase 3 (formerly 2B), catalytic subunit, beta isoform (calcineurin A beta)
PPP3CC	protein phosphatase 3 (formerly 2B), catalytic subunit, gamma isoform (calcineurin A gamma)
PRAM1	PML-RARA regulated adaptor molecule 1
PRKACA	protein kinase, cAMP-dependent, catalytic, alpha
PRKD2	protein kinase D2
PRX	periaxin
PSCD2L	pleckstrin homology, Sec7 and coiled-coil domains 2-like
PSPH	phosphoserine phosphatase
PTOV1	prostate tumor overexpressed gene 1
PTPRA	protein tyrosine phosphatase, receptor type, A
PTPRK	protein tyrosine phosphatase, receptor type, K
QPCTL	glutaminyl-peptide cyclotransferase-like
RAB17	RAB17, member RAS oncogene family
RAB1B	RAB1B, member RAS oncogene family
RAB1C	RAB1C, member RAS oncogene family
RAB25	RAB25, member RAS oncogene family
RAB33B	RAB33B, member RAS oncogene family
RAB3B	RAB3B, member RAS oncogene family
RAB4A	RAB4A, member RAS oncogene family
RAB5B	RAB5B, member RAS oncogene family
RAB6B	RAB6B, member RAS oncogene family
RANBP10	RAN binding protein 10
RAP1B	RAP1B, member of RAS oncogene family
RAP1GDS1	RAP1, GTP-GDP dissociation stimulator 1
RASA3	RAS p21 protein activator 3
RASA4	RAS p21 protein activator 4
RASSF2	Ras association (RalGDS/AF-6) domain family 2
RGC32	-
RGL1	ral guanine nucleotide dissociation stimulator-like 1
RGS22	regulator of G-protein signalling 22
RHOQ	ras homolog gene family, member Q
RHOU	ras homolog gene family, member U
RICS	-
RP1L1	retinitis pigmentosa 1-like 1
RPP38	ribonuclease P/MRP 38kDa subunit
SAMD8	sterile alpha motif domain containing 8
SASH1	SAM and SH3 domain containing 1
SAT2	spermidine/spermine N1-acetyltransferase 2
SAV1	salvador homolog 1 (Drosophila)
SDC4	syndecan 4 (amphiglycan, ryudocan)
SDCBP	syndecan binding protein (syntenin)
SDPR	serum deprivation response (phosphatidylserine binding protein)
SEC11L1	SEC11-like 1 (S. cerevisiae)
SEC24C	SEC24 related gene family, member C (S. cerevisiae)
SEC31A	SEC31 homolog A (S. cerevisiae)
SEPN1	selenoprotein N, 1
SH2B3	SH2B adaptor protein 3
SH2D1B	SH2 domain containing 1B
SH3BGRL	SH3 domain binding glutamic acid-rich protein like
SH3BP1	SH3-domain binding protein 1
SH3KBP1	SH3-domain kinase binding protein 1
SH3RF1	SH3 domain containing ring finger 1
SHANK2	SH3 and multiple ankyrin repeat domains 2
SHANK3	SH3 and multiple ankyrin repeat domains 3
SHC2	SHC (Src homology 2 domain containing) transforming protein 2
SHMT1	serine hydroxymethyltransferase 1 (soluble)
SI	sucrase-isomaltase (alpha-glucosidase)
SIGLEC11	sialic acid binding Ig-like lectin 11
SIGLEC12	sialic acid binding Ig-like lectin 12
SIGLEC7	sialic acid binding Ig-like lectin 7
SIPA1L3	signal-induced proliferation-associated 1 like 3
SIRPA	signal-regulatory protein alpha
SLA	Src-like-adaptor
SLAMF6	SLAM family member 6
SLC24A1	solute carrier family 24 (sodium/potassium/calcium exchanger), member 1
SLC4A3	solute carrier family 4, anion exchanger, member 3
SLC4A4	solute carrier family 4, sodium bicarbonate cotransporter, member 4
SLC6A9	solute carrier family 6 (neurotransmitter transporter, glycine), member 9
SNAP91	synaptosomal-associated protein, 91kDa homolog (mouse)
SNX12	sorting nexin 12
SNX17	sorting nexin 17
SNX26	sorting nexin 26
SNX8	sorting nexin 8
SOCS7	suppressor of cytokine signaling 7
SORBS2	sorbin and SH3 domain containing 2
SORT1	sortilin 1
SOS2	son of sevenless homolog 2 (Drosophila)
SPAG5	sperm associated antigen 5
SPCS2	signal peptidase complex subunit 2 homolog (S. cerevisiae)
SPEN	spen homolog, transcriptional regulator (Drosophila)
SPHK2	sphingosine kinase 2
SPIRE1	spire homolog 1 (Drosophila)
SPRY1	sprouty homolog 1, antagonist of FGF signaling (Drosophila)
SPSB1	splA/ryanodine receptor domain and SOCS box containing 1
SSH3	slingshot homolog 3 (Drosophila)
ST5	suppression of tumorigenicity 5
STAM2	signal transducing adaptor molecule (SH3 domain and ITAM motif) 2
STAP2	-
STAU1	staufen, RNA binding protein, homolog 1 (Drosophila)
STK39	serine threonine kinase 39 (STE20/SPS1 homolog, yeast)
STMN2	stathmin-like 2
STXBP1	syntaxin binding protein 1
STXBP3	syntaxin binding protein 3
SURF2	surfeit 2
SYNGAP1	synaptic Ras GTPase activating protein 1 homolog (rat)
SYNJ2	synaptojanin 2
SYNJ2BP	synaptojanin 2 binding protein
SYP	synaptophysin
SYT3	synaptotagmin III
SYT6	synaptotagmin VI
SYT7	synaptotagmin VII
SYT9	synaptotagmin IX
TACC1	transforming, acidic coiled-coil containing protein 1
TAL2	T-cell acute lymphocytic leukemia 2
TAOK1	TAO kinase 1
TBKBP1	TBK1 binding protein 1
TCL1B	T-cell leukemia/lymphoma 1B
TCL6	T-cell leukemia/lymphoma 6
TDRD1	tudor domain containing 1
TGDS	TDP-glucose 4,6-dehydratase
TGOLN2	trans-golgi network protein 2
THEM4	thioesterase superfamily member 4
THOC2	THO complex 2
THOC5	THO complex 5
THOP1	thimet oligopeptidase 1
TIRAP	toll-interleukin 1 receptor (TIR) domain containing adaptor protein
TMEM132A	transmembrane protein 132A
TNFSF11	tumor necrosis factor (ligand) superfamily, member 11
TNNI2	troponin I type 2 (skeletal, fast)
TNS1	tensin 1
TNS4	tensin 4
TOM1L1	target of myb1-like 1 (chicken)
TPSB2	tryptase beta 2
TREML1	triggering receptor expressed on myeloid cells-like 1
TREX1	three prime repair exonuclease 1
TRIM25	tripartite motif-containing 25
TRIM32	tripartite motif-containing 32
TRIM8	tripartite motif-containing 8
TRPM7	transient receptor potential cation channel, subfamily M, member 7
TRPV6	transient receptor potential cation channel, subfamily V, member 6
TSKS	-
TSLP	-
TSSC1	tumor suppressing subtransferable candidate 1
TTBK1	tau tubulin kinase 1
TTC17	tetratricopeptide repeat domain 17
TUB	tubby homolog (mouse)
TUBA3	-
TUBG2	tubulin, gamma 2
UBASH3A	ubiquitin associated and SH3 domain containing, A
UBD	ubiquitin D
UBE2E3	ubiquitin-conjugating enzyme E2E 3 (UBC4/5 homolog, yeast)
UBE2R2	ubiquitin-conjugating enzyme E2R 2
ULK3	unc-51-like kinase 3 (C. elegans)
USP45	ubiquitin specific peptidase 45
USP6NL	USP6 N-terminal like
VAMP4	vesicle-associated membrane protein 4
VAV1	vav 1 oncogene
VEPH1	ventricular zone expressed PH domain homolog 1 (zebrafish)
VNN2	vanin 2
VPS13A	vacuolar protein sorting 13 homolog A (S. cerevisiae)
VSNL1	visinin-like 1
WDR13	WD repeat domain 13
WDR40A	WD repeat domain 40A
WDR44	WD repeat domain 44
WDR62	WD repeat domain 62
WEE1	WEE1 homolog (S. pombe)
XPA	xeroderma pigmentosum, complementation group A
YTHDC1	YTH domain containing 1
ZBTB12	zinc finger and BTB domain containing 12
ZNF32	zinc finger protein 32
ZNF467	zinc finger protein 467
ZNF622	zinc finger protein 622
ZZEF1	zinc finger, ZZ-type with EF-hand domain 1

## Sheet: Third_Module_GSEA
Overlap Results
Collection(s):	BP
# overlaps shown:	10
# genesets in collections:	825
# genes in comparison (n):	1323
# genes in collections (N):	6032
Gene Set Name	# Genes in Gene Set (K)	Description	# Genes in Overlap (k)	k/K	p value
G_PROTEIN_COUPLED_RECEPTOR_PROTEIN_SIGNALING_PATHWAY	326	Genes annotated by the GO term GO:0007186. The series of molecular signals generated as a consequence of a G-protein coupled receptor binding to its physiological ligand.	157	0.4816	0
SECOND_MESSENGER_MEDIATED_SIGNALING	146	Genes annotated by the GO term GO:0019932. A series of molecular signals in which an ion or small molecule is formed or released into the cytosol, thereby helping relay the signal within the cell.	82	0.5616	0
CYCLIC_NUCLEOTIDE_MEDIATED_SIGNALING	100	Genes annotated by the GO term GO:0019935. A series of molecular signals in which a cell uses a cyclic nucleotide to convert an extracellular signal into a response.	66	0.66	0
G_PROTEIN_SIGNALING_COUPLED_TO_CYCLIC_NUCLEOTIDE_SECOND_MESSENGER	98	Genes annotated by the GO term GO:0007187. The series of molecular signals generated as a consequence of a G-protein coupled receptor binding to its physiological ligand, followed by modulation of a nucleotide cyclase activity and a subsequent change in the concentration of a cyclic nucleotide.	66	0.6735	0
G_PROTEIN_SIGNALING_COUPLED_TO_CAMP_NUCLEOTIDE_SECOND_MESSENGER	64	Genes annotated by the GO term GO:0007188. The series of molecular signals generated as a consequence of a G-protein coupled receptor binding to its physiological ligand, followed by modulation of adenylyl cyclase activity and a subsequent change in the concentration of cyclic AMP.	43	0.6719	8.1e-15
CAMP_MEDIATED_SIGNALING	65	Genes annotated by the GO term GO:0019933. A series of molecular signals in which a cell uses cyclic AMP to convert an extracellular signal into a response.	43	0.6615	1.9e-14
BLOOD_COAGULATION	43	Genes annotated by the GO term GO:0007596. The sequential process by which the multiple coagulation factors of the blood interact, ultimately resulting in the formation of an insoluble fibrin clot; it may be divided into three stages: stage 1, the formation of intrinsic and extrinsic prothrombin converting principle; stage 2, the formation of thrombin; stage 3, the formation of stable fibrin poly…	32	0.7442	2.69e-13
COAGULATION	44	Genes annotated by the GO term GO:0050817. The process by which a fluid solution, or part of it, changes into a solid or semisolid mass.	32	0.7273	7.8e-13
HEMOSTASIS	48	Genes annotated by the GO term GO:0007599. The stopping of bleeding (loss of body fluid) or the arrest of the circulation to an organ or part.	33	0.6875	4.31e-12
REGULATION_OF_BODY_FLUID_LEVELS	57	Genes annotated by the GO term GO:0050878. Any process that modulates the levels of body fluids.	36	0.6316	2.04e-11
Gene/Gene Set Overlap Matrix
Gene Symbol	Description	G_PROTEIN_COUPLED_RECEPTOR_PROTEIN_SIGNALING_PATHWAY	SECOND_MESSENGER_MEDIATED_SIGNALING	CYCLIC_NUCLEOTIDE_MEDIATED_SIGNALING	G_PROTEIN_SIGNALING_COUPLED_TO_CYCLIC_NUCLEOTIDE_SECOND_MESSENGER	G_PROTEIN_SIGNALING_COUPLED_TO_CAMP_NUCLEOTIDE_SECOND_MESSENGER	CAMP_MEDIATED_SIGNALING	BLOOD_COAGULATION	COAGULATION	HEMOSTASIS	REGULATION_OF_BODY_FLUID_LEVELS
OPRK1	opioid receptor, kappa 1	G_PROTEIN_COUPLED_RECEPTOR_PROTEIN_SIGNALING_PATHWAY	SECOND_MESSENGER_MEDIATED_SIGNALING	CYCLIC_NUCLEOTIDE_MEDIATED_SIGNALING	G_PROTEIN_SIGNALING_COUPLED_TO_CYCLIC_NUCLEOTIDE_SECOND_MESSENGER	G_PROTEIN_SIGNALING_COUPLED_TO_CAMP_NUCLEOTIDE_SECOND_MESSENGER	CAMP_MEDIATED_SIGNALING
GALR2	galanin receptor 2	G_PROTEIN_COUPLED_RECEPTOR_PROTEIN_SIGNALING_PATHWAY	SECOND_MESSENGER_MEDIATED_SIGNALING	CYCLIC_NUCLEOTIDE_MEDIATED_SIGNALING	G_PROTEIN_SIGNALING_COUPLED_TO_CYCLIC_NUCLEOTIDE_SECOND_MESSENGER	G_PROTEIN_SIGNALING_COUPLED_TO_CAMP_NUCLEOTIDE_SECOND_MESSENGER	CAMP_MEDIATED_SIGNALING
MCHR1	melanin-concentrating hormone receptor 1	G_PROTEIN_COUPLED_RECEPTOR_PROTEIN_SIGNALING_PATHWAY	SECOND_MESSENGER_MEDIATED_SIGNALING	CYCLIC_NUCLEOTIDE_MEDIATED_SIGNALING	G_PROTEIN_SIGNALING_COUPLED_TO_CYCLIC_NUCLEOTIDE_SECOND_MESSENGER	G_PROTEIN_SIGNALING_COUPLED_TO_CAMP_NUCLEOTIDE_SECOND_MESSENGER	CAMP_MEDIATED_SIGNALING
NPY2R	neuropeptide Y receptor Y2	G_PROTEIN_COUPLED_RECEPTOR_PROTEIN_SIGNALING_PATHWAY	SECOND_MESSENGER_MEDIATED_SIGNALING	CYCLIC_NUCLEOTIDE_MEDIATED_SIGNALING	G_PROTEIN_SIGNALING_COUPLED_TO_CYCLIC_NUCLEOTIDE_SECOND_MESSENGER	G_PROTEIN_SIGNALING_COUPLED_TO_CAMP_NUCLEOTIDE_SECOND_MESSENGER	CAMP_MEDIATED_SIGNALING
MC4R	melanocortin 4 receptor	G_PROTEIN_COUPLED_RECEPTOR_PROTEIN_SIGNALING_PATHWAY	SECOND_MESSENGER_MEDIATED_SIGNALING	CYCLIC_NUCLEOTIDE_MEDIATED_SIGNALING	G_PROTEIN_SIGNALING_COUPLED_TO_CYCLIC_NUCLEOTIDE_SECOND_MESSENGER	G_PROTEIN_SIGNALING_COUPLED_TO_CAMP_NUCLEOTIDE_SECOND_MESSENGER	CAMP_MEDIATED_SIGNALING
GIPR	gastric inhibitory polypeptide receptor	G_PROTEIN_COUPLED_RECEPTOR_PROTEIN_SIGNALING_PATHWAY	SECOND_MESSENGER_MEDIATED_SIGNALING	CYCLIC_NUCLEOTIDE_MEDIATED_SIGNALING	G_PROTEIN_SIGNALING_COUPLED_TO_CYCLIC_NUCLEOTIDE_SECOND_MESSENGER	G_PROTEIN_SIGNALING_COUPLED_TO_CAMP_NUCLEOTIDE_SECOND_MESSENGER	CAMP_MEDIATED_SIGNALING
GCGR	glucagon receptor	G_PROTEIN_COUPLED_RECEPTOR_PROTEIN_SIGNALING_PATHWAY	SECOND_MESSENGER_MEDIATED_SIGNALING	CYCLIC_NUCLEOTIDE_MEDIATED_SIGNALING	G_PROTEIN_SIGNALING_COUPLED_TO_CYCLIC_NUCLEOTIDE_SECOND_MESSENGER	G_PROTEIN_SIGNALING_COUPLED_TO_CAMP_NUCLEOTIDE_SECOND_MESSENGER	CAMP_MEDIATED_SIGNALING
DRD2	dopamine receptor D2	G_PROTEIN_COUPLED_RECEPTOR_PROTEIN_SIGNALING_PATHWAY	SECOND_MESSENGER_MEDIATED_SIGNALING	CYCLIC_NUCLEOTIDE_MEDIATED_SIGNALING	G_PROTEIN_SIGNALING_COUPLED_TO_CYCLIC_NUCLEOTIDE_SECOND_MESSENGER	G_PROTEIN_SIGNALING_COUPLED_TO_CAMP_NUCLEOTIDE_SECOND_MESSENGER	CAMP_MEDIATED_SIGNALING
GRM4	glutamate receptor, metabotropic 4	G_PROTEIN_COUPLED_RECEPTOR_PROTEIN_SIGNALING_PATHWAY	SECOND_MESSENGER_MEDIATED_SIGNALING	CYCLIC_NUCLEOTIDE_MEDIATED_SIGNALING	G_PROTEIN_SIGNALING_COUPLED_TO_CYCLIC_NUCLEOTIDE_SECOND_MESSENGER	G_PROTEIN_SIGNALING_COUPLED_TO_CAMP_NUCLEOTIDE_SECOND_MESSENGER	CAMP_MEDIATED_SIGNALING
CORT	cortistatin	G_PROTEIN_COUPLED_RECEPTOR_PROTEIN_SIGNALING_PATHWAY	SECOND_MESSENGER_MEDIATED_SIGNALING	CYCLIC_NUCLEOTIDE_MEDIATED_SIGNALING	G_PROTEIN_SIGNALING_COUPLED_TO_CYCLIC_NUCLEOTIDE_SECOND_MESSENGER	G_PROTEIN_SIGNALING_COUPLED_TO_CAMP_NUCLEOTIDE_SECOND_MESSENGER	CAMP_MEDIATED_SIGNALING
CALCA	calcitonin/calcitonin-related polypeptide, alpha	G_PROTEIN_COUPLED_RECEPTOR_PROTEIN_SIGNALING_PATHWAY	SECOND_MESSENGER_MEDIATED_SIGNALING	CYCLIC_NUCLEOTIDE_MEDIATED_SIGNALING	G_PROTEIN_SIGNALING_COUPLED_TO_CYCLIC_NUCLEOTIDE_SECOND_MESSENGER	G_PROTEIN_SIGNALING_COUPLED_TO_CAMP_NUCLEOTIDE_SECOND_MESSENGER	CAMP_MEDIATED_SIGNALING
DRD1	dopamine receptor D1	G_PROTEIN_COUPLED_RECEPTOR_PROTEIN_SIGNALING_PATHWAY	SECOND_MESSENGER_MEDIATED_SIGNALING	CYCLIC_NUCLEOTIDE_MEDIATED_SIGNALING	G_PROTEIN_SIGNALING_COUPLED_TO_CYCLIC_NUCLEOTIDE_SECOND_MESSENGER	G_PROTEIN_SIGNALING_COUPLED_TO_CAMP_NUCLEOTIDE_SECOND_MESSENGER	CAMP_MEDIATED_SIGNALING
ADCYAP1	adenylate cyclase activating polypeptide 1 (pituitary)	G_PROTEIN_COUPLED_RECEPTOR_PROTEIN_SIGNALING_PATHWAY	SECOND_MESSENGER_MEDIATED_SIGNALING	CYCLIC_NUCLEOTIDE_MEDIATED_SIGNALING	G_PROTEIN_SIGNALING_COUPLED_TO_CYCLIC_NUCLEOTIDE_SECOND_MESSENGER	G_PROTEIN_SIGNALING_COUPLED_TO_CAMP_NUCLEOTIDE_SECOND_MESSENGER	CAMP_MEDIATED_SIGNALING
PTHLH	parathyroid hormone-like hormone	G_PROTEIN_COUPLED_RECEPTOR_PROTEIN_SIGNALING_PATHWAY	SECOND_MESSENGER_MEDIATED_SIGNALING	CYCLIC_NUCLEOTIDE_MEDIATED_SIGNALING	G_PROTEIN_SIGNALING_COUPLED_TO_CYCLIC_NUCLEOTIDE_SECOND_MESSENGER	G_PROTEIN_SIGNALING_COUPLED_TO_CAMP_NUCLEOTIDE_SECOND_MESSENGER	CAMP_MEDIATED_SIGNALING
GHRH	growth hormone releasing hormone	G_PROTEIN_COUPLED_RECEPTOR_PROTEIN_SIGNALING_PATHWAY	SECOND_MESSENGER_MEDIATED_SIGNALING	CYCLIC_NUCLEOTIDE_MEDIATED_SIGNALING	G_PROTEIN_SIGNALING_COUPLED_TO_CYCLIC_NUCLEOTIDE_SECOND_MESSENGER	G_PROTEIN_SIGNALING_COUPLED_TO_CAMP_NUCLEOTIDE_SECOND_MESSENGER	CAMP_MEDIATED_SIGNALING
GRM7	glutamate receptor, metabotropic 7	G_PROTEIN_COUPLED_RECEPTOR_PROTEIN_SIGNALING_PATHWAY	SECOND_MESSENGER_MEDIATED_SIGNALING	CYCLIC_NUCLEOTIDE_MEDIATED_SIGNALING	G_PROTEIN_SIGNALING_COUPLED_TO_CYCLIC_NUCLEOTIDE_SECOND_MESSENGER	G_PROTEIN_SIGNALING_COUPLED_TO_CAMP_NUCLEOTIDE_SECOND_MESSENGER	CAMP_MEDIATED_SIGNALING
GRM2	glutamate receptor, metabotropic 2	G_PROTEIN_COUPLED_RECEPTOR_PROTEIN_SIGNALING_PATHWAY	SECOND_MESSENGER_MEDIATED_SIGNALING	CYCLIC_NUCLEOTIDE_MEDIATED_SIGNALING	G_PROTEIN_SIGNALING_COUPLED_TO_CYCLIC_NUCLEOTIDE_SECOND_MESSENGER	G_PROTEIN_SIGNALING_COUPLED_TO_CAMP_NUCLEOTIDE_SECOND_MESSENGER	CAMP_MEDIATED_SIGNALING
ADRA1B	adrenergic, alpha-1B-, receptor	G_PROTEIN_COUPLED_RECEPTOR_PROTEIN_SIGNALING_PATHWAY	SECOND_MESSENGER_MEDIATED_SIGNALING	CYCLIC_NUCLEOTIDE_MEDIATED_SIGNALING	G_PROTEIN_SIGNALING_COUPLED_TO_CYCLIC_NUCLEOTIDE_SECOND_MESSENGER	G_PROTEIN_SIGNALING_COUPLED_TO_CAMP_NUCLEOTIDE_SECOND_MESSENGER	CAMP_MEDIATED_SIGNALING
OPRL1	opiate receptor-like 1	G_PROTEIN_COUPLED_RECEPTOR_PROTEIN_SIGNALING_PATHWAY	SECOND_MESSENGER_MEDIATED_SIGNALING	CYCLIC_NUCLEOTIDE_MEDIATED_SIGNALING	G_PROTEIN_SIGNALING_COUPLED_TO_CYCLIC_NUCLEOTIDE_SECOND_MESSENGER	G_PROTEIN_SIGNALING_COUPLED_TO_CAMP_NUCLEOTIDE_SECOND_MESSENGER	CAMP_MEDIATED_SIGNALING
RGS1	regulator of G-protein signalling 1	G_PROTEIN_COUPLED_RECEPTOR_PROTEIN_SIGNALING_PATHWAY	SECOND_MESSENGER_MEDIATED_SIGNALING	CYCLIC_NUCLEOTIDE_MEDIATED_SIGNALING	G_PROTEIN_SIGNALING_COUPLED_TO_CYCLIC_NUCLEOTIDE_SECOND_MESSENGER	G_PROTEIN_SIGNALING_COUPLED_TO_CAMP_NUCLEOTIDE_SECOND_MESSENGER	CAMP_MEDIATED_SIGNALING
CHRM5	cholinergic receptor, muscarinic 5	G_PROTEIN_COUPLED_RECEPTOR_PROTEIN_SIGNALING_PATHWAY	SECOND_MESSENGER_MEDIATED_SIGNALING	CYCLIC_NUCLEOTIDE_MEDIATED_SIGNALING	G_PROTEIN_SIGNALING_COUPLED_TO_CYCLIC_NUCLEOTIDE_SECOND_MESSENGER	G_PROTEIN_SIGNALING_COUPLED_TO_CAMP_NUCLEOTIDE_SECOND_MESSENGER	CAMP_MEDIATED_SIGNALING
NPY1R	neuropeptide Y receptor Y1	G_PROTEIN_COUPLED_RECEPTOR_PROTEIN_SIGNALING_PATHWAY	SECOND_MESSENGER_MEDIATED_SIGNALING	CYCLIC_NUCLEOTIDE_MEDIATED_SIGNALING	G_PROTEIN_SIGNALING_COUPLED_TO_CYCLIC_NUCLEOTIDE_SECOND_MESSENGER	G_PROTEIN_SIGNALING_COUPLED_TO_CAMP_NUCLEOTIDE_SECOND_MESSENGER	CAMP_MEDIATED_SIGNALING
EDNRA	endothelin receptor type A	G_PROTEIN_COUPLED_RECEPTOR_PROTEIN_SIGNALING_PATHWAY	SECOND_MESSENGER_MEDIATED_SIGNALING	CYCLIC_NUCLEOTIDE_MEDIATED_SIGNALING	G_PROTEIN_SIGNALING_COUPLED_TO_CYCLIC_NUCLEOTIDE_SECOND_MESSENGER	G_PROTEIN_SIGNALING_COUPLED_TO_CAMP_NUCLEOTIDE_SECOND_MESSENGER	CAMP_MEDIATED_SIGNALING
ADRB2	adrenergic, beta-2-, receptor, surface	G_PROTEIN_COUPLED_RECEPTOR_PROTEIN_SIGNALING_PATHWAY	SECOND_MESSENGER_MEDIATED_SIGNALING	CYCLIC_NUCLEOTIDE_MEDIATED_SIGNALING	G_PROTEIN_SIGNALING_COUPLED_TO_CYCLIC_NUCLEOTIDE_SECOND_MESSENGER	G_PROTEIN_SIGNALING_COUPLED_TO_CAMP_NUCLEOTIDE_SECOND_MESSENGER	CAMP_MEDIATED_SIGNALING
ADRB3	adrenergic, beta-3-, receptor	G_PROTEIN_COUPLED_RECEPTOR_PROTEIN_SIGNALING_PATHWAY	SECOND_MESSENGER_MEDIATED_SIGNALING	CYCLIC_NUCLEOTIDE_MEDIATED_SIGNALING	G_PROTEIN_SIGNALING_COUPLED_TO_CYCLIC_NUCLEOTIDE_SECOND_MESSENGER	G_PROTEIN_SIGNALING_COUPLED_TO_CAMP_NUCLEOTIDE_SECOND_MESSENGER	CAMP_MEDIATED_SIGNALING
GLP1R	glucagon-like peptide 1 receptor	G_PROTEIN_COUPLED_RECEPTOR_PROTEIN_SIGNALING_PATHWAY	SECOND_MESSENGER_MEDIATED_SIGNALING	CYCLIC_NUCLEOTIDE_MEDIATED_SIGNALING	G_PROTEIN_SIGNALING_COUPLED_TO_CYCLIC_NUCLEOTIDE_SECOND_MESSENGER	G_PROTEIN_SIGNALING_COUPLED_TO_CAMP_NUCLEOTIDE_SECOND_MESSENGER	CAMP_MEDIATED_SIGNALING
GHRHR	growth hormone releasing hormone receptor	G_PROTEIN_COUPLED_RECEPTOR_PROTEIN_SIGNALING_PATHWAY	SECOND_MESSENGER_MEDIATED_SIGNALING	CYCLIC_NUCLEOTIDE_MEDIATED_SIGNALING	G_PROTEIN_SIGNALING_COUPLED_TO_CYCLIC_NUCLEOTIDE_SECOND_MESSENGER	G_PROTEIN_SIGNALING_COUPLED_TO_CAMP_NUCLEOTIDE_SECOND_MESSENGER	CAMP_MEDIATED_SIGNALING
ADORA2B	adenosine A2b receptor	G_PROTEIN_COUPLED_RECEPTOR_PROTEIN_SIGNALING_PATHWAY	SECOND_MESSENGER_MEDIATED_SIGNALING	CYCLIC_NUCLEOTIDE_MEDIATED_SIGNALING	G_PROTEIN_SIGNALING_COUPLED_TO_CYCLIC_NUCLEOTIDE_SECOND_MESSENGER	G_PROTEIN_SIGNALING_COUPLED_TO_CAMP_NUCLEOTIDE_SECOND_MESSENGER	CAMP_MEDIATED_SIGNALING
CRHR1	corticotropin releasing hormone receptor 1	G_PROTEIN_COUPLED_RECEPTOR_PROTEIN_SIGNALING_PATHWAY	SECOND_MESSENGER_MEDIATED_SIGNALING	CYCLIC_NUCLEOTIDE_MEDIATED_SIGNALING	G_PROTEIN_SIGNALING_COUPLED_TO_CYCLIC_NUCLEOTIDE_SECOND_MESSENGER	G_PROTEIN_SIGNALING_COUPLED_TO_CAMP_NUCLEOTIDE_SECOND_MESSENGER	CAMP_MEDIATED_SIGNALING
GNAS	GNAS complex locus	G_PROTEIN_COUPLED_RECEPTOR_PROTEIN_SIGNALING_PATHWAY	SECOND_MESSENGER_MEDIATED_SIGNALING	CYCLIC_NUCLEOTIDE_MEDIATED_SIGNALING	G_PROTEIN_SIGNALING_COUPLED_TO_CYCLIC_NUCLEOTIDE_SECOND_MESSENGER	G_PROTEIN_SIGNALING_COUPLED_TO_CAMP_NUCLEOTIDE_SECOND_MESSENGER	CAMP_MEDIATED_SIGNALING
ADRB1	adrenergic, beta-1-, receptor	G_PROTEIN_COUPLED_RECEPTOR_PROTEIN_SIGNALING_PATHWAY	SECOND_MESSENGER_MEDIATED_SIGNALING	CYCLIC_NUCLEOTIDE_MEDIATED_SIGNALING	G_PROTEIN_SIGNALING_COUPLED_TO_CYCLIC_NUCLEOTIDE_SECOND_MESSENGER	G_PROTEIN_SIGNALING_COUPLED_TO_CAMP_NUCLEOTIDE_SECOND_MESSENGER	CAMP_MEDIATED_SIGNALING
DRD5	dopamine receptor D5	G_PROTEIN_COUPLED_RECEPTOR_PROTEIN_SIGNALING_PATHWAY	SECOND_MESSENGER_MEDIATED_SIGNALING	CYCLIC_NUCLEOTIDE_MEDIATED_SIGNALING	G_PROTEIN_SIGNALING_COUPLED_TO_CYCLIC_NUCLEOTIDE_SECOND_MESSENGER	G_PROTEIN_SIGNALING_COUPLED_TO_CAMP_NUCLEOTIDE_SECOND_MESSENGER	CAMP_MEDIATED_SIGNALING
CALCR	calcitonin receptor	G_PROTEIN_COUPLED_RECEPTOR_PROTEIN_SIGNALING_PATHWAY	SECOND_MESSENGER_MEDIATED_SIGNALING	CYCLIC_NUCLEOTIDE_MEDIATED_SIGNALING	G_PROTEIN_SIGNALING_COUPLED_TO_CYCLIC_NUCLEOTIDE_SECOND_MESSENGER	G_PROTEIN_SIGNALING_COUPLED_TO_CAMP_NUCLEOTIDE_SECOND_MESSENGER	CAMP_MEDIATED_SIGNALING
CHRM2	cholinergic receptor, muscarinic 2	G_PROTEIN_COUPLED_RECEPTOR_PROTEIN_SIGNALING_PATHWAY	SECOND_MESSENGER_MEDIATED_SIGNALING	CYCLIC_NUCLEOTIDE_MEDIATED_SIGNALING	G_PROTEIN_SIGNALING_COUPLED_TO_CYCLIC_NUCLEOTIDE_SECOND_MESSENGER	G_PROTEIN_SIGNALING_COUPLED_TO_CAMP_NUCLEOTIDE_SECOND_MESSENGER	CAMP_MEDIATED_SIGNALING
EDNRB	endothelin receptor type B	G_PROTEIN_COUPLED_RECEPTOR_PROTEIN_SIGNALING_PATHWAY	SECOND_MESSENGER_MEDIATED_SIGNALING	CYCLIC_NUCLEOTIDE_MEDIATED_SIGNALING	G_PROTEIN_SIGNALING_COUPLED_TO_CYCLIC_NUCLEOTIDE_SECOND_MESSENGER	G_PROTEIN_SIGNALING_COUPLED_TO_CAMP_NUCLEOTIDE_SECOND_MESSENGER	CAMP_MEDIATED_SIGNALING
GRK5	G protein-coupled receptor kinase 5	G_PROTEIN_COUPLED_RECEPTOR_PROTEIN_SIGNALING_PATHWAY	SECOND_MESSENGER_MEDIATED_SIGNALING	CYCLIC_NUCLEOTIDE_MEDIATED_SIGNALING	G_PROTEIN_SIGNALING_COUPLED_TO_CYCLIC_NUCLEOTIDE_SECOND_MESSENGER	G_PROTEIN_SIGNALING_COUPLED_TO_CAMP_NUCLEOTIDE_SECOND_MESSENGER	CAMP_MEDIATED_SIGNALING
GALR1	galanin receptor 1	G_PROTEIN_COUPLED_RECEPTOR_PROTEIN_SIGNALING_PATHWAY	SECOND_MESSENGER_MEDIATED_SIGNALING	CYCLIC_NUCLEOTIDE_MEDIATED_SIGNALING	G_PROTEIN_SIGNALING_COUPLED_TO_CYCLIC_NUCLEOTIDE_SECOND_MESSENGER	G_PROTEIN_SIGNALING_COUPLED_TO_CAMP_NUCLEOTIDE_SECOND_MESSENGER	CAMP_MEDIATED_SIGNALING
GRM8	glutamate receptor, metabotropic 8	G_PROTEIN_COUPLED_RECEPTOR_PROTEIN_SIGNALING_PATHWAY	SECOND_MESSENGER_MEDIATED_SIGNALING	CYCLIC_NUCLEOTIDE_MEDIATED_SIGNALING	G_PROTEIN_SIGNALING_COUPLED_TO_CYCLIC_NUCLEOTIDE_SECOND_MESSENGER	G_PROTEIN_SIGNALING_COUPLED_TO_CAMP_NUCLEOTIDE_SECOND_MESSENGER	CAMP_MEDIATED_SIGNALING
ADRA2A	adrenergic, alpha-2A-, receptor	G_PROTEIN_COUPLED_RECEPTOR_PROTEIN_SIGNALING_PATHWAY	SECOND_MESSENGER_MEDIATED_SIGNALING	CYCLIC_NUCLEOTIDE_MEDIATED_SIGNALING	G_PROTEIN_SIGNALING_COUPLED_TO_CYCLIC_NUCLEOTIDE_SECOND_MESSENGER	G_PROTEIN_SIGNALING_COUPLED_TO_CAMP_NUCLEOTIDE_SECOND_MESSENGER	CAMP_MEDIATED_SIGNALING
GLP2R	glucagon-like peptide 2 receptor	G_PROTEIN_COUPLED_RECEPTOR_PROTEIN_SIGNALING_PATHWAY	SECOND_MESSENGER_MEDIATED_SIGNALING	CYCLIC_NUCLEOTIDE_MEDIATED_SIGNALING	G_PROTEIN_SIGNALING_COUPLED_TO_CYCLIC_NUCLEOTIDE_SECOND_MESSENGER	G_PROTEIN_SIGNALING_COUPLED_TO_CAMP_NUCLEOTIDE_SECOND_MESSENGER	CAMP_MEDIATED_SIGNALING
GNAI3	guanine nucleotide binding protein (G protein), alpha inhibiting activity polypeptide 3	G_PROTEIN_COUPLED_RECEPTOR_PROTEIN_SIGNALING_PATHWAY	SECOND_MESSENGER_MEDIATED_SIGNALING	CYCLIC_NUCLEOTIDE_MEDIATED_SIGNALING	G_PROTEIN_SIGNALING_COUPLED_TO_CYCLIC_NUCLEOTIDE_SECOND_MESSENGER	G_PROTEIN_SIGNALING_COUPLED_TO_CAMP_NUCLEOTIDE_SECOND_MESSENGER	CAMP_MEDIATED_SIGNALING
PRKACB	protein kinase, cAMP-dependent, catalytic, beta	G_PROTEIN_COUPLED_RECEPTOR_PROTEIN_SIGNALING_PATHWAY	SECOND_MESSENGER_MEDIATED_SIGNALING	CYCLIC_NUCLEOTIDE_MEDIATED_SIGNALING	G_PROTEIN_SIGNALING_COUPLED_TO_CYCLIC_NUCLEOTIDE_SECOND_MESSENGER	G_PROTEIN_SIGNALING_COUPLED_TO_CAMP_NUCLEOTIDE_SECOND_MESSENGER	CAMP_MEDIATED_SIGNALING
CRHR2	corticotropin releasing hormone receptor 2	G_PROTEIN_COUPLED_RECEPTOR_PROTEIN_SIGNALING_PATHWAY	SECOND_MESSENGER_MEDIATED_SIGNALING	CYCLIC_NUCLEOTIDE_MEDIATED_SIGNALING	G_PROTEIN_SIGNALING_COUPLED_TO_CYCLIC_NUCLEOTIDE_SECOND_MESSENGER	G_PROTEIN_SIGNALING_COUPLED_TO_CAMP_NUCLEOTIDE_SECOND_MESSENGER	CAMP_MEDIATED_SIGNALING
CCR1	chemokine (C-C motif) receptor 1	G_PROTEIN_COUPLED_RECEPTOR_PROTEIN_SIGNALING_PATHWAY	SECOND_MESSENGER_MEDIATED_SIGNALING	CYCLIC_NUCLEOTIDE_MEDIATED_SIGNALING	G_PROTEIN_SIGNALING_COUPLED_TO_CYCLIC_NUCLEOTIDE_SECOND_MESSENGER
NPY	neuropeptide Y	G_PROTEIN_COUPLED_RECEPTOR_PROTEIN_SIGNALING_PATHWAY	SECOND_MESSENGER_MEDIATED_SIGNALING	CYCLIC_NUCLEOTIDE_MEDIATED_SIGNALING	G_PROTEIN_SIGNALING_COUPLED_TO_CYCLIC_NUCLEOTIDE_SECOND_MESSENGER
CNR2	cannabinoid receptor 2 (macrophage)	G_PROTEIN_COUPLED_RECEPTOR_PROTEIN_SIGNALING_PATHWAY	SECOND_MESSENGER_MEDIATED_SIGNALING	CYCLIC_NUCLEOTIDE_MEDIATED_SIGNALING	G_PROTEIN_SIGNALING_COUPLED_TO_CYCLIC_NUCLEOTIDE_SECOND_MESSENGER
MTNR1A	melatonin receptor 1A	G_PROTEIN_COUPLED_RECEPTOR_PROTEIN_SIGNALING_PATHWAY	SECOND_MESSENGER_MEDIATED_SIGNALING	CYCLIC_NUCLEOTIDE_MEDIATED_SIGNALING	G_PROTEIN_SIGNALING_COUPLED_TO_CYCLIC_NUCLEOTIDE_SECOND_MESSENGER
OPRM1	opioid receptor, mu 1	G_PROTEIN_COUPLED_RECEPTOR_PROTEIN_SIGNALING_PATHWAY	SECOND_MESSENGER_MEDIATED_SIGNALING	CYCLIC_NUCLEOTIDE_MEDIATED_SIGNALING	G_PROTEIN_SIGNALING_COUPLED_TO_CYCLIC_NUCLEOTIDE_SECOND_MESSENGER
CNR1	cannabinoid receptor 1 (brain)	G_PROTEIN_COUPLED_RECEPTOR_PROTEIN_SIGNALING_PATHWAY	SECOND_MESSENGER_MEDIATED_SIGNALING	CYCLIC_NUCLEOTIDE_MEDIATED_SIGNALING	G_PROTEIN_SIGNALING_COUPLED_TO_CYCLIC_NUCLEOTIDE_SECOND_MESSENGER
SSTR1	somatostatin receptor 1	G_PROTEIN_COUPLED_RECEPTOR_PROTEIN_SIGNALING_PATHWAY	SECOND_MESSENGER_MEDIATED_SIGNALING	CYCLIC_NUCLEOTIDE_MEDIATED_SIGNALING	G_PROTEIN_SIGNALING_COUPLED_TO_CYCLIC_NUCLEOTIDE_SECOND_MESSENGER
SSTR2	somatostatin receptor 2	G_PROTEIN_COUPLED_RECEPTOR_PROTEIN_SIGNALING_PATHWAY	SECOND_MESSENGER_MEDIATED_SIGNALING	CYCLIC_NUCLEOTIDE_MEDIATED_SIGNALING	G_PROTEIN_SIGNALING_COUPLED_TO_CYCLIC_NUCLEOTIDE_SECOND_MESSENGER
VIPR1	vasoactive intestinal peptide receptor 1	G_PROTEIN_COUPLED_RECEPTOR_PROTEIN_SIGNALING_PATHWAY	SECOND_MESSENGER_MEDIATED_SIGNALING	CYCLIC_NUCLEOTIDE_MEDIATED_SIGNALING	G_PROTEIN_SIGNALING_COUPLED_TO_CYCLIC_NUCLEOTIDE_SECOND_MESSENGER
HTR6	5-hydroxytryptamine (serotonin) receptor 6	G_PROTEIN_COUPLED_RECEPTOR_PROTEIN_SIGNALING_PATHWAY	SECOND_MESSENGER_MEDIATED_SIGNALING	CYCLIC_NUCLEOTIDE_MEDIATED_SIGNALING	G_PROTEIN_SIGNALING_COUPLED_TO_CYCLIC_NUCLEOTIDE_SECOND_MESSENGER
MTNR1B	melatonin receptor 1B	G_PROTEIN_COUPLED_RECEPTOR_PROTEIN_SIGNALING_PATHWAY	SECOND_MESSENGER_MEDIATED_SIGNALING	CYCLIC_NUCLEOTIDE_MEDIATED_SIGNALING	G_PROTEIN_SIGNALING_COUPLED_TO_CYCLIC_NUCLEOTIDE_SECOND_MESSENGER
TSHR	thyroid stimulating hormone receptor	G_PROTEIN_COUPLED_RECEPTOR_PROTEIN_SIGNALING_PATHWAY	SECOND_MESSENGER_MEDIATED_SIGNALING	CYCLIC_NUCLEOTIDE_MEDIATED_SIGNALING	G_PROTEIN_SIGNALING_COUPLED_TO_CYCLIC_NUCLEOTIDE_SECOND_MESSENGER
SSTR3	somatostatin receptor 3	G_PROTEIN_COUPLED_RECEPTOR_PROTEIN_SIGNALING_PATHWAY	SECOND_MESSENGER_MEDIATED_SIGNALING	CYCLIC_NUCLEOTIDE_MEDIATED_SIGNALING	G_PROTEIN_SIGNALING_COUPLED_TO_CYCLIC_NUCLEOTIDE_SECOND_MESSENGER
PTGIR	prostaglandin I2 (prostacyclin) receptor (IP)	G_PROTEIN_COUPLED_RECEPTOR_PROTEIN_SIGNALING_PATHWAY	SECOND_MESSENGER_MEDIATED_SIGNALING	CYCLIC_NUCLEOTIDE_MEDIATED_SIGNALING	G_PROTEIN_SIGNALING_COUPLED_TO_CYCLIC_NUCLEOTIDE_SECOND_MESSENGER
MC3R	melanocortin 3 receptor	G_PROTEIN_COUPLED_RECEPTOR_PROTEIN_SIGNALING_PATHWAY	SECOND_MESSENGER_MEDIATED_SIGNALING	CYCLIC_NUCLEOTIDE_MEDIATED_SIGNALING	G_PROTEIN_SIGNALING_COUPLED_TO_CYCLIC_NUCLEOTIDE_SECOND_MESSENGER
OPRD1	opioid receptor, delta 1	G_PROTEIN_COUPLED_RECEPTOR_PROTEIN_SIGNALING_PATHWAY	SECOND_MESSENGER_MEDIATED_SIGNALING	CYCLIC_NUCLEOTIDE_MEDIATED_SIGNALING	G_PROTEIN_SIGNALING_COUPLED_TO_CYCLIC_NUCLEOTIDE_SECOND_MESSENGER
LHCGR	luteinizing hormone/choriogonadotropin receptor	G_PROTEIN_COUPLED_RECEPTOR_PROTEIN_SIGNALING_PATHWAY	SECOND_MESSENGER_MEDIATED_SIGNALING	CYCLIC_NUCLEOTIDE_MEDIATED_SIGNALING	G_PROTEIN_SIGNALING_COUPLED_TO_CYCLIC_NUCLEOTIDE_SECOND_MESSENGER
SSTR4	somatostatin receptor 4	G_PROTEIN_COUPLED_RECEPTOR_PROTEIN_SIGNALING_PATHWAY	SECOND_MESSENGER_MEDIATED_SIGNALING	CYCLIC_NUCLEOTIDE_MEDIATED_SIGNALING	G_PROTEIN_SIGNALING_COUPLED_TO_CYCLIC_NUCLEOTIDE_SECOND_MESSENGER
SSTR5	somatostatin receptor 5	G_PROTEIN_COUPLED_RECEPTOR_PROTEIN_SIGNALING_PATHWAY	SECOND_MESSENGER_MEDIATED_SIGNALING	CYCLIC_NUCLEOTIDE_MEDIATED_SIGNALING	G_PROTEIN_SIGNALING_COUPLED_TO_CYCLIC_NUCLEOTIDE_SECOND_MESSENGER
MC1R	melanocortin 1 receptor (alpha melanocyte stimulating hormone receptor)	G_PROTEIN_COUPLED_RECEPTOR_PROTEIN_SIGNALING_PATHWAY	SECOND_MESSENGER_MEDIATED_SIGNALING	CYCLIC_NUCLEOTIDE_MEDIATED_SIGNALING	G_PROTEIN_SIGNALING_COUPLED_TO_CYCLIC_NUCLEOTIDE_SECOND_MESSENGER
CALCRL	calcitonin receptor-like	G_PROTEIN_COUPLED_RECEPTOR_PROTEIN_SIGNALING_PATHWAY	SECOND_MESSENGER_MEDIATED_SIGNALING	CYCLIC_NUCLEOTIDE_MEDIATED_SIGNALING	G_PROTEIN_SIGNALING_COUPLED_TO_CYCLIC_NUCLEOTIDE_SECOND_MESSENGER
MC2R	melanocortin 2 receptor (adrenocorticotropic hormone)	G_PROTEIN_COUPLED_RECEPTOR_PROTEIN_SIGNALING_PATHWAY	SECOND_MESSENGER_MEDIATED_SIGNALING	CYCLIC_NUCLEOTIDE_MEDIATED_SIGNALING	G_PROTEIN_SIGNALING_COUPLED_TO_CYCLIC_NUCLEOTIDE_SECOND_MESSENGER
MC5R	melanocortin 5 receptor	G_PROTEIN_COUPLED_RECEPTOR_PROTEIN_SIGNALING_PATHWAY	SECOND_MESSENGER_MEDIATED_SIGNALING	CYCLIC_NUCLEOTIDE_MEDIATED_SIGNALING	G_PROTEIN_SIGNALING_COUPLED_TO_CYCLIC_NUCLEOTIDE_SECOND_MESSENGER
GNAQ	guanine nucleotide binding protein (G protein), q polypeptide	G_PROTEIN_COUPLED_RECEPTOR_PROTEIN_SIGNALING_PATHWAY	SECOND_MESSENGER_MEDIATED_SIGNALING					BLOOD_COAGULATION	COAGULATION	HEMOSTASIS	REGULATION_OF_BODY_FLUID_LEVELS
F2RL3	coagulation factor II (thrombin) receptor-like 3	G_PROTEIN_COUPLED_RECEPTOR_PROTEIN_SIGNALING_PATHWAY	SECOND_MESSENGER_MEDIATED_SIGNALING					BLOOD_COAGULATION	COAGULATION	HEMOSTASIS	REGULATION_OF_BODY_FLUID_LEVELS
TACR1	tachykinin receptor 1	G_PROTEIN_COUPLED_RECEPTOR_PROTEIN_SIGNALING_PATHWAY	SECOND_MESSENGER_MEDIATED_SIGNALING
IL8	interleukin 8	G_PROTEIN_COUPLED_RECEPTOR_PROTEIN_SIGNALING_PATHWAY	SECOND_MESSENGER_MEDIATED_SIGNALING
LTB4R	leukotriene B4 receptor	G_PROTEIN_COUPLED_RECEPTOR_PROTEIN_SIGNALING_PATHWAY	SECOND_MESSENGER_MEDIATED_SIGNALING
HOMER1	homer homolog 1 (Drosophila)	G_PROTEIN_COUPLED_RECEPTOR_PROTEIN_SIGNALING_PATHWAY	SECOND_MESSENGER_MEDIATED_SIGNALING
AVPR1A	arginine vasopressin receptor 1A	G_PROTEIN_COUPLED_RECEPTOR_PROTEIN_SIGNALING_PATHWAY	SECOND_MESSENGER_MEDIATED_SIGNALING
AVPR1B	arginine vasopressin receptor 1B	G_PROTEIN_COUPLED_RECEPTOR_PROTEIN_SIGNALING_PATHWAY	SECOND_MESSENGER_MEDIATED_SIGNALING
GNA15	guanine nucleotide binding protein (G protein), alpha 15 (Gq class)	G_PROTEIN_COUPLED_RECEPTOR_PROTEIN_SIGNALING_PATHWAY	SECOND_MESSENGER_MEDIATED_SIGNALING
P2RY2	purinergic receptor P2Y, G-protein coupled, 2	G_PROTEIN_COUPLED_RECEPTOR_PROTEIN_SIGNALING_PATHWAY	SECOND_MESSENGER_MEDIATED_SIGNALING
ANG	angiogenin, ribonuclease, RNase A family, 5	G_PROTEIN_COUPLED_RECEPTOR_PROTEIN_SIGNALING_PATHWAY	SECOND_MESSENGER_MEDIATED_SIGNALING
CHRM1	cholinergic receptor, muscarinic 1	G_PROTEIN_COUPLED_RECEPTOR_PROTEIN_SIGNALING_PATHWAY	SECOND_MESSENGER_MEDIATED_SIGNALING
PICK1	protein interacting with PRKCA 1	G_PROTEIN_COUPLED_RECEPTOR_PROTEIN_SIGNALING_PATHWAY	SECOND_MESSENGER_MEDIATED_SIGNALING
EDN2	endothelin 2	G_PROTEIN_COUPLED_RECEPTOR_PROTEIN_SIGNALING_PATHWAY	SECOND_MESSENGER_MEDIATED_SIGNALING
HTR2B	5-hydroxytryptamine (serotonin) receptor 2B	G_PROTEIN_COUPLED_RECEPTOR_PROTEIN_SIGNALING_PATHWAY	SECOND_MESSENGER_MEDIATED_SIGNALING
GNA12	guanine nucleotide binding protein (G protein) alpha 12	G_PROTEIN_COUPLED_RECEPTOR_PROTEIN_SIGNALING_PATHWAY						BLOOD_COAGULATION	COAGULATION	HEMOSTASIS	REGULATION_OF_BODY_FLUID_LEVELS
VIP	vasoactive intestinal peptide	G_PROTEIN_COUPLED_RECEPTOR_PROTEIN_SIGNALING_PATHWAY									REGULATION_OF_BODY_FLUID_LEVELS
GHRL	ghrelin/obestatin preprohormone	G_PROTEIN_COUPLED_RECEPTOR_PROTEIN_SIGNALING_PATHWAY
GHSR	growth hormone secretagogue receptor	G_PROTEIN_COUPLED_RECEPTOR_PROTEIN_SIGNALING_PATHWAY
CCL3	chemokine (C-C motif) ligand 3	G_PROTEIN_COUPLED_RECEPTOR_PROTEIN_SIGNALING_PATHWAY
CXCL9	chemokine (C-X-C motif) ligand 9	G_PROTEIN_COUPLED_RECEPTOR_PROTEIN_SIGNALING_PATHWAY
C5	complement component 5	G_PROTEIN_COUPLED_RECEPTOR_PROTEIN_SIGNALING_PATHWAY
CXCL1	chemokine (C-X-C motif) ligand 1 (melanoma growth stimulating activity, alpha)	G_PROTEIN_COUPLED_RECEPTOR_PROTEIN_SIGNALING_PATHWAY
C3AR1	complement component 3a receptor 1	G_PROTEIN_COUPLED_RECEPTOR_PROTEIN_SIGNALING_PATHWAY
CXCL12	chemokine (C-X-C motif) ligand 12 (stromal cell-derived factor 1)	G_PROTEIN_COUPLED_RECEPTOR_PROTEIN_SIGNALING_PATHWAY
CCBP2	chemokine binding protein 2	G_PROTEIN_COUPLED_RECEPTOR_PROTEIN_SIGNALING_PATHWAY
CCRL1	chemokine (C-C motif) receptor-like 1	G_PROTEIN_COUPLED_RECEPTOR_PROTEIN_SIGNALING_PATHWAY
PYY	peptide YY	G_PROTEIN_COUPLED_RECEPTOR_PROTEIN_SIGNALING_PATHWAY
HCRTR1	hypocretin (orexin) receptor 1	G_PROTEIN_COUPLED_RECEPTOR_PROTEIN_SIGNALING_PATHWAY
HCRTR2	hypocretin (orexin) receptor 2	G_PROTEIN_COUPLED_RECEPTOR_PROTEIN_SIGNALING_PATHWAY
APOE	apolipoprotein E	G_PROTEIN_COUPLED_RECEPTOR_PROTEIN_SIGNALING_PATHWAY
PPYR1	pancreatic polypeptide receptor 1	G_PROTEIN_COUPLED_RECEPTOR_PROTEIN_SIGNALING_PATHWAY
AGRP	agouti related protein homolog (mouse)	G_PROTEIN_COUPLED_RECEPTOR_PROTEIN_SIGNALING_PATHWAY
GCG	glucagon	G_PROTEIN_COUPLED_RECEPTOR_PROTEIN_SIGNALING_PATHWAY
HTR1A	5-hydroxytryptamine (serotonin) receptor 1A	G_PROTEIN_COUPLED_RECEPTOR_PROTEIN_SIGNALING_PATHWAY
DRD3	dopamine receptor D3	G_PROTEIN_COUPLED_RECEPTOR_PROTEIN_SIGNALING_PATHWAY
SST	somatostatin	G_PROTEIN_COUPLED_RECEPTOR_PROTEIN_SIGNALING_PATHWAY
GRM6	glutamate receptor, metabotropic 6	G_PROTEIN_COUPLED_RECEPTOR_PROTEIN_SIGNALING_PATHWAY
RHO	rhodopsin (opsin 2, rod pigment) (retinitis pigmentosa 4, autosomal dominant)	G_PROTEIN_COUPLED_RECEPTOR_PROTEIN_SIGNALING_PATHWAY
PTH	parathyroid hormone	G_PROTEIN_COUPLED_RECEPTOR_PROTEIN_SIGNALING_PATHWAY
NPFF	neuropeptide FF-amide peptide precursor	G_PROTEIN_COUPLED_RECEPTOR_PROTEIN_SIGNALING_PATHWAY
GRM1	glutamate receptor, metabotropic 1	G_PROTEIN_COUPLED_RECEPTOR_PROTEIN_SIGNALING_PATHWAY
HTR2A	5-hydroxytryptamine (serotonin) receptor 2A	G_PROTEIN_COUPLED_RECEPTOR_PROTEIN_SIGNALING_PATHWAY
NTSR1	neurotensin receptor 1 (high affinity)	G_PROTEIN_COUPLED_RECEPTOR_PROTEIN_SIGNALING_PATHWAY
ADRA2C	adrenergic, alpha-2C-, receptor	G_PROTEIN_COUPLED_RECEPTOR_PROTEIN_SIGNALING_PATHWAY
TSHB	thyroid stimulating hormone, beta	G_PROTEIN_COUPLED_RECEPTOR_PROTEIN_SIGNALING_PATHWAY
MLN	motilin	G_PROTEIN_COUPLED_RECEPTOR_PROTEIN_SIGNALING_PATHWAY
RGS4	regulator of G-protein signalling 4	G_PROTEIN_COUPLED_RECEPTOR_PROTEIN_SIGNALING_PATHWAY
GNG4	guanine nucleotide binding protein (G protein), gamma 4	G_PROTEIN_COUPLED_RECEPTOR_PROTEIN_SIGNALING_PATHWAY
GNG7	guanine nucleotide binding protein (G protein), gamma 7	G_PROTEIN_COUPLED_RECEPTOR_PROTEIN_SIGNALING_PATHWAY
GRK6	G protein-coupled receptor kinase 6	G_PROTEIN_COUPLED_RECEPTOR_PROTEIN_SIGNALING_PATHWAY
RAMP1	receptor (calcitonin) activity modifying protein 1	G_PROTEIN_COUPLED_RECEPTOR_PROTEIN_SIGNALING_PATHWAY
RGS12	regulator of G-protein signalling 12	G_PROTEIN_COUPLED_RECEPTOR_PROTEIN_SIGNALING_PATHWAY
RGS14	regulator of G-protein signalling 14	G_PROTEIN_COUPLED_RECEPTOR_PROTEIN_SIGNALING_PATHWAY
RGS2	regulator of G-protein signalling 2, 24kDa	G_PROTEIN_COUPLED_RECEPTOR_PROTEIN_SIGNALING_PATHWAY
RGS20	regulator of G-protein signalling 20	G_PROTEIN_COUPLED_RECEPTOR_PROTEIN_SIGNALING_PATHWAY
RGS5	regulator of G-protein signalling 5	G_PROTEIN_COUPLED_RECEPTOR_PROTEIN_SIGNALING_PATHWAY
RIC8B	resistance to inhibitors of cholinesterase 8 homolog B (C. elegans)	G_PROTEIN_COUPLED_RECEPTOR_PROTEIN_SIGNALING_PATHWAY
MLNR	motilin receptor	G_PROTEIN_COUPLED_RECEPTOR_PROTEIN_SIGNALING_PATHWAY
ABCA1	ATP-binding cassette, sub-family A (ABC1), member 1	G_PROTEIN_COUPLED_RECEPTOR_PROTEIN_SIGNALING_PATHWAY
F2RL1	coagulation factor II (thrombin) receptor-like 1	G_PROTEIN_COUPLED_RECEPTOR_PROTEIN_SIGNALING_PATHWAY
APOA1	apolipoprotein A-I	G_PROTEIN_COUPLED_RECEPTOR_PROTEIN_SIGNALING_PATHWAY
GNB3	guanine nucleotide binding protein (G protein), beta polypeptide 3	G_PROTEIN_COUPLED_RECEPTOR_PROTEIN_SIGNALING_PATHWAY
HOMER3	homer homolog 3 (Drosophila)	G_PROTEIN_COUPLED_RECEPTOR_PROTEIN_SIGNALING_PATHWAY
APOC3	apolipoprotein C-III	G_PROTEIN_COUPLED_RECEPTOR_PROTEIN_SIGNALING_PATHWAY
GRP	gastrin-releasing peptide	G_PROTEIN_COUPLED_RECEPTOR_PROTEIN_SIGNALING_PATHWAY
PRLHR	prolactin releasing hormone receptor	G_PROTEIN_COUPLED_RECEPTOR_PROTEIN_SIGNALING_PATHWAY
TAC3	tachykinin 3 (neuromedin K, neurokinin beta)	G_PROTEIN_COUPLED_RECEPTOR_PROTEIN_SIGNALING_PATHWAY
GNB1	guanine nucleotide binding protein (G protein), beta polypeptide 1	G_PROTEIN_COUPLED_RECEPTOR_PROTEIN_SIGNALING_PATHWAY
FSHR	follicle stimulating hormone receptor	G_PROTEIN_COUPLED_RECEPTOR_PROTEIN_SIGNALING_PATHWAY
TACR2	tachykinin receptor 2	G_PROTEIN_COUPLED_RECEPTOR_PROTEIN_SIGNALING_PATHWAY
NPFFR2	neuropeptide FF receptor 2	G_PROTEIN_COUPLED_RECEPTOR_PROTEIN_SIGNALING_PATHWAY
MAS1	MAS1 oncogene	G_PROTEIN_COUPLED_RECEPTOR_PROTEIN_SIGNALING_PATHWAY
CHRM3	cholinergic receptor, muscarinic 3	G_PROTEIN_COUPLED_RECEPTOR_PROTEIN_SIGNALING_PATHWAY
CHRM4	cholinergic receptor, muscarinic 4	G_PROTEIN_COUPLED_RECEPTOR_PROTEIN_SIGNALING_PATHWAY
GNRHR	gonadotropin-releasing hormone receptor	G_PROTEIN_COUPLED_RECEPTOR_PROTEIN_SIGNALING_PATHWAY
C3	complement component 3	G_PROTEIN_COUPLED_RECEPTOR_PROTEIN_SIGNALING_PATHWAY
FFAR1	free fatty acid receptor 1	G_PROTEIN_COUPLED_RECEPTOR_PROTEIN_SIGNALING_PATHWAY
FFAR2	free fatty acid receptor 2	G_PROTEIN_COUPLED_RECEPTOR_PROTEIN_SIGNALING_PATHWAY
FFAR3	free fatty acid receptor 3	G_PROTEIN_COUPLED_RECEPTOR_PROTEIN_SIGNALING_PATHWAY
GNAZ	guanine nucleotide binding protein (G protein), alpha z polypeptide	G_PROTEIN_COUPLED_RECEPTOR_PROTEIN_SIGNALING_PATHWAY
GPR1	G protein-coupled receptor 1	G_PROTEIN_COUPLED_RECEPTOR_PROTEIN_SIGNALING_PATHWAY
GPR17	G protein-coupled receptor 17	G_PROTEIN_COUPLED_RECEPTOR_PROTEIN_SIGNALING_PATHWAY
GPR37	G protein-coupled receptor 37 (endothelin receptor type B-like)	G_PROTEIN_COUPLED_RECEPTOR_PROTEIN_SIGNALING_PATHWAY
GPSM2	G-protein signalling modulator 2 (AGS3-like, C. elegans)	G_PROTEIN_COUPLED_RECEPTOR_PROTEIN_SIGNALING_PATHWAY
NPY5R	neuropeptide Y receptor Y5	G_PROTEIN_COUPLED_RECEPTOR_PROTEIN_SIGNALING_PATHWAY
RASD1	RAS, dexamethasone-induced 1	G_PROTEIN_COUPLED_RECEPTOR_PROTEIN_SIGNALING_PATHWAY
TACR3	tachykinin receptor 3	G_PROTEIN_COUPLED_RECEPTOR_PROTEIN_SIGNALING_PATHWAY
TBXA2R	thromboxane A2 receptor	G_PROTEIN_COUPLED_RECEPTOR_PROTEIN_SIGNALING_PATHWAY
TRHR	thyrotropin-releasing hormone receptor	G_PROTEIN_COUPLED_RECEPTOR_PROTEIN_SIGNALING_PATHWAY
UCN	urocortin	G_PROTEIN_COUPLED_RECEPTOR_PROTEIN_SIGNALING_PATHWAY
SLA2	Src-like-adaptor 2		SECOND_MESSENGER_MEDIATED_SIGNALING
PF4	platelet factor 4 (chemokine (C-X-C motif) ligand 4)							BLOOD_COAGULATION	COAGULATION	HEMOSTASIS	REGULATION_OF_BODY_FLUID_LEVELS
GP1BA	glycoprotein Ib (platelet), alpha polypeptide							BLOOD_COAGULATION	COAGULATION	HEMOSTASIS	REGULATION_OF_BODY_FLUID_LEVELS
ADORA2A	adenosine A2a receptor							BLOOD_COAGULATION	COAGULATION	HEMOSTASIS	REGULATION_OF_BODY_FLUID_LEVELS
KNG1	kininogen 1							BLOOD_COAGULATION	COAGULATION	HEMOSTASIS	REGULATION_OF_BODY_FLUID_LEVELS
F2	coagulation factor II (thrombin)							BLOOD_COAGULATION	COAGULATION	HEMOSTASIS	REGULATION_OF_BODY_FLUID_LEVELS
TMPRSS6	transmembrane protease, serine 6							BLOOD_COAGULATION	COAGULATION	HEMOSTASIS	REGULATION_OF_BODY_FLUID_LEVELS
PROC	protein C (inactivator of coagulation factors Va and VIIIa)							BLOOD_COAGULATION	COAGULATION	HEMOSTASIS	REGULATION_OF_BODY_FLUID_LEVELS
SERPINE1	serpin peptidase inhibitor, clade E (nexin, plasminogen activator inhibitor type 1), member 1							BLOOD_COAGULATION	COAGULATION	HEMOSTASIS	REGULATION_OF_BODY_FLUID_LEVELS
CD40LG	CD40 ligand (TNF superfamily, member 5, hyper-IgM syndrome)							BLOOD_COAGULATION	COAGULATION	HEMOSTASIS	REGULATION_OF_BODY_FLUID_LEVELS
PLAT	plasminogen activator, tissue							BLOOD_COAGULATION	COAGULATION	HEMOSTASIS	REGULATION_OF_BODY_FLUID_LEVELS
PLG	plasminogen							BLOOD_COAGULATION	COAGULATION	HEMOSTASIS	REGULATION_OF_BODY_FLUID_LEVELS
ITGA2	integrin, alpha 2 (CD49B, alpha 2 subunit of VLA-2 receptor)							BLOOD_COAGULATION	COAGULATION	HEMOSTASIS	REGULATION_OF_BODY_FLUID_LEVELS
VWF	von Willebrand factor							BLOOD_COAGULATION	COAGULATION	HEMOSTASIS	REGULATION_OF_BODY_FLUID_LEVELS
F2R	coagulation factor II (thrombin) receptor							BLOOD_COAGULATION	COAGULATION	HEMOSTASIS	REGULATION_OF_BODY_FLUID_LEVELS
LMAN1	lectin, mannose-binding, 1							BLOOD_COAGULATION	COAGULATION	HEMOSTASIS	REGULATION_OF_BODY_FLUID_LEVELS
GGCX	gamma-glutamyl carboxylase							BLOOD_COAGULATION	COAGULATION	HEMOSTASIS	REGULATION_OF_BODY_FLUID_LEVELS
CD36	CD36 molecule (thrombospondin receptor)							BLOOD_COAGULATION	COAGULATION	HEMOSTASIS	REGULATION_OF_BODY_FLUID_LEVELS
F10	coagulation factor X							BLOOD_COAGULATION	COAGULATION	HEMOSTASIS	REGULATION_OF_BODY_FLUID_LEVELS
F12	coagulation factor XII (Hageman factor)							BLOOD_COAGULATION	COAGULATION	HEMOSTASIS	REGULATION_OF_BODY_FLUID_LEVELS
F13A1	coagulation factor XIII, A1 polypeptide							BLOOD_COAGULATION	COAGULATION	HEMOSTASIS	REGULATION_OF_BODY_FLUID_LEVELS
F13B	coagulation factor XIII, B polypeptide							BLOOD_COAGULATION	COAGULATION	HEMOSTASIS	REGULATION_OF_BODY_FLUID_LEVELS
F5	coagulation factor V (proaccelerin, labile factor)							BLOOD_COAGULATION	COAGULATION	HEMOSTASIS	REGULATION_OF_BODY_FLUID_LEVELS
F7	coagulation factor VII (serum prothrombin conversion accelerator)							BLOOD_COAGULATION	COAGULATION	HEMOSTASIS	REGULATION_OF_BODY_FLUID_LEVELS
F8	coagulation factor VIII, procoagulant component (hemophilia A)							BLOOD_COAGULATION	COAGULATION	HEMOSTASIS	REGULATION_OF_BODY_FLUID_LEVELS
F9	coagulation factor IX (plasma thromboplastic component, Christmas disease, hemophilia B)							BLOOD_COAGULATION	COAGULATION	HEMOSTASIS	REGULATION_OF_BODY_FLUID_LEVELS
ITGB3	integrin, beta 3 (platelet glycoprotein IIIa, antigen CD61)							BLOOD_COAGULATION	COAGULATION	HEMOSTASIS	REGULATION_OF_BODY_FLUID_LEVELS
PROS1	protein S (alpha)							BLOOD_COAGULATION	COAGULATION	HEMOSTASIS	REGULATION_OF_BODY_FLUID_LEVELS
TFPI	tissue factor pathway inhibitor (lipoprotein-associated coagulation inhibitor)							BLOOD_COAGULATION	COAGULATION	HEMOSTASIS	REGULATION_OF_BODY_FLUID_LEVELS
THBD	thrombomodulin							BLOOD_COAGULATION	COAGULATION	HEMOSTASIS	REGULATION_OF_BODY_FLUID_LEVELS
GPI	glucose phosphate isomerase									HEMOSTASIS	REGULATION_OF_BODY_FLUID_LEVELS
CEL	carboxyl ester lipase (bile salt-stimulated lipase)										REGULATION_OF_BODY_FLUID_LEVELS
COPA	coatomer protein complex, subunit alpha										REGULATION_OF_BODY_FLUID_LEVELS
ACVRL1	activin A receptor type II-like 1
TGFB2	transforming growth factor, beta 2
CXCL10	chemokine (C-X-C motif) ligand 10
SIGIRR	single immunoglobulin and toll-interleukin 1 receptor (TIR) domain
TGFB1	transforming growth factor, beta 1 (Camurati-Engelmann disease)
CCL5	chemokine (C-C motif) ligand 5
CCL22	chemokine (C-C motif) ligand 22
CCL21	chemokine (C-C motif) ligand 21
CXCL11	chemokine (C-X-C motif) ligand 11
CXCL6	chemokine (C-X-C motif) ligand 6 (granulocyte chemotactic protein 2)
CCR4	chemokine (C-C motif) receptor 4
CCL11	chemokine (C-C motif) ligand 11
CXCL2	chemokine (C-X-C motif) ligand 2
ADORA1	adenosine A1 receptor
CCL4	chemokine (C-C motif) ligand 4
TNFAIP6	tumor necrosis factor, alpha-induced protein 6
ADM	adrenomedullin
AHSG	alpha-2-HS-glycoprotein
C2	complement component 2
KRT1	keratin 1 (epidermolytic hyperkeratosis)
MBL2	mannose-binding lectin (protein C) 2, soluble (opsonic defect)
CFHR1	complement factor H-related 1
LBP	lipopolysaccharide binding protein
APCS	amyloid P component, serum
ORM1	orosomucoid 1
CHRNA7	cholinergic receptor, nicotinic, alpha 7
RAC1	ras-related C3 botulinum toxin substrate 1 (rho family, small GTP binding protein Rac1)
IL10RB	interleukin 10 receptor, beta
IL1A	interleukin 1, alpha
AOAH	acyloxyacyl hydrolase (neutrophil)
CYBB	cytochrome b-245, beta polypeptide (chronic granulomatous disease)
F11R	F11 receptor
PTX3	pentraxin-related gene, rapidly induced by IL-1 beta
ACHE	acetylcholinesterase (Yt blood group)
FGF7	fibroblast growth factor 7 (keratinocyte growth factor)
CTGF	connective tissue growth factor
MDK	midkine (neurite growth-promoting factor 2)
INHBA	inhibin, beta A (activin A, activin AB alpha polypeptide)
INHA	inhibin, alpha
GRIK2	glutamate receptor, ionotropic, kainate 2
AGT	angiotensinogen (serpin peptidase inhibitor, clade A, member 8)
GRIK1	glutamate receptor, ionotropic, kainate 1
PDGFA	platelet-derived growth factor alpha polypeptide
FGF5	fibroblast growth factor 5
THY1	Thy-1 cell surface antigen
GRIA3	glutamate receptor, ionotrophic, AMPA 3
GRID2	glutamate receptor, ionotropic, delta 2
GRIN2C	glutamate receptor, ionotropic, N-methyl D-aspartate 2C
CD14	CD14 molecule
FGFR3	fibroblast growth factor receptor 3 (achondroplasia, thanatophoric dwarfism)
GDF10	growth differentiation factor 10
IGF2	insulin-like growth factor 2 (somatomedin A)
CD47	CD47 molecule
INS	insulin
CEP57	centrosomal protein 57kDa
ENG	endoglin (Osler-Rendu-Weber syndrome 1)
BMPR2	bone morphogenetic protein receptor, type II (serine/threonine kinase)
FNTA	farnesyltransferase, CAAX box, alpha
FMOD	fibromodulin
TGFBR3	transforming growth factor, beta receptor III (betaglycan, 300kDa)
EPS8	epidermal growth factor receptor pathway substrate 8
AP3S1	adaptor-related protein complex 3, sigma 1 subunit
FGFR4	fibroblast growth factor receptor 4
FIBP	fibroblast growth factor (acidic) intracellular binding protein
PTPRG	protein tyrosine phosphatase, receptor type, G
PTPRU	protein tyrosine phosphatase, receptor type, U
TRIO	triple functional domain (PTPRF interacting)
ASGR2	asialoglycoprotein receptor 2
BSG	basigin (Ok blood group)
IL13RA1	interleukin 13 receptor, alpha 1
LRP6	low density lipoprotein receptor-related protein 6
CXCL13	chemokine (C-X-C motif) ligand 13 (B-cell chemoattractant)
CCL7	chemokine (C-C motif) ligand 7
CXCL5	chemokine (C-X-C motif) ligand 5
SFTPD	surfactant, pulmonary-associated protein D
SAA1	serum amyloid A1
CCL19	chemokine (C-C motif) ligand 19
CXCR3	chemokine (C-X-C motif) receptor 3
PLAU	plasminogen activator, urokinase
IL10	interleukin 10
KAL1	Kallmann syndrome 1 sequence
IL4	interleukin 4
RALBP1	ralA binding protein 1
SPN	sialophorin (leukosialin, CD43)
FGF2	fibroblast growth factor 2 (basic)
HTR2C	5-hydroxytryptamine (serotonin) receptor 2C
CRH	corticotropin releasing hormone
DLG4	discs, large homolog 4 (Drosophila)
PMCH	pro-melanin-concentrating hormone
AGTR2	angiotensin II receptor, type 2
CRHBP	corticotropin releasing hormone binding protein
VLDLR	very low density lipoprotein receptor
ADCY8	adenylate cyclase 8 (brain)
IL1RAPL1	interleukin 1 receptor accessory protein-like 1
PCSK9	proprotein convertase subtilisin/kexin type 9
RASGRP4	RAS guanyl releasing protein 4
ALB	albumin
HTR3A	5-hydroxytryptamine (serotonin) receptor 3A
SRI	sorcin
GCK	glucokinase (hexokinase 4, maturity onset diabetes of the young 2)
SNCAIP	synuclein, alpha interacting protein (synphilin)
NLGN1	neuroligin 1
SYT1	synaptotagmin I
SYN3	synapsin III
COL4A4	collagen, type IV, alpha 4
SLC6A4	solute carrier family 6 (neurotransmitter transporter, serotonin), member 4
PLP1	proteolipid protein 1 (Pelizaeus-Merzbacher disease, spastic paraplegia 2, uncomplicated)
CD9	CD9 molecule
FURIN	furin (paired basic amino acid cleaving enzyme)
PCSK5	proprotein convertase subtilisin/kexin type 5
PHEX	phosphate regulating endopeptidase homolog, X-linked (hypophosphatemia, vitamin D resistant rickets)
PCSK1	proprotein convertase subtilisin/kexin type 1
PCSK2	proprotein convertase subtilisin/kexin type 2
PCSK6	proprotein convertase subtilisin/kexin type 6
NRP1	neuropilin 1
SEMA3B	sema domain, immunoglobulin domain (Ig), short basic domain, secreted, (semaphorin) 3B
SEMA4F	sema domain, immunoglobulin domain (Ig), transmembrane domain (TM) and short cytoplasmic domain, (semaphorin) 4F
ENPEP	glutamyl aminopeptidase (aminopeptidase A)
TGFB3	transforming growth factor, beta 3
BMP2	bone morphogenetic protein 2
SCG5	secretogranin V (7B2 protein)
ACCN1	amiloride-sensitive cation channel 1, neuronal (degenerin)
PMP22	peripheral myelin protein 22
GRIA1	glutamate receptor, ionotropic, AMPA 1
GRIA2	glutamate receptor, ionotropic, AMPA 2
GABARAP	GABA(A) receptor-associated protein
KIF1B	kinesin family member 1B
AKAP5	A kinase (PRKA) anchor protein 5
CACNA1B	calcium channel, voltage-dependent, L type, alpha 1B subunit
CNP	2',3'-cyclic nucleotide 3' phosphodiesterase
HCRT	hypocretin (orexin) neuropeptide precursor
KCNMA1	potassium large conductance calcium-activated channel, subfamily M, alpha member 1
SYN2	synapsin II
FGF18	fibroblast growth factor 18
FGF4	fibroblast growth factor 4 (heparin secretory transforming protein 1, Kaposi sarcoma oncogene)
PGF	placental growth factor, vascular endothelial growth factor-related protein
GRAP2	GRB2-related adaptor protein 2
CRB1	crumbs homolog 1 (Drosophila)
LHB	luteinizing hormone beta polypeptide
AMH	anti-Mullerian hormone
TNFSF10	tumor necrosis factor (ligand) superfamily, member 10
FGF13	fibroblast growth factor 13
GNRH1	gonadotropin-releasing hormone 1 (luteinizing-releasing hormone)
IL1B	interleukin 1, beta
FGFBP1	fibroblast growth factor binding protein 1
CGB	chorionic gonadotropin, beta polypeptide
FGF3	fibroblast growth factor 3 (murine mammary tumor virus integration site (v-int-2) oncogene homolog)
FGF6	fibroblast growth factor 6
FGF17	fibroblast growth factor 17
AVP	arginine vasopressin (neurophysin II, antidiuretic hormone, diabetes insipidus, neurohypophyseal)
ASIP	agouti signaling protein, nonagouti homolog (mouse)
POMC	proopiomelanocortin (adrenocorticotropin/ beta-lipotropin/ alpha-melanocyte stimulating hormone/ beta-melanocyte stimulating hormone/ beta-endorphin)
EDN3	endothelin 3
IAPP	islet amyloid polypeptide
CGA	glycoprotein hormones, alpha polypeptide
FGF9	fibroblast growth factor 9 (glia-activating factor)
TRH	thyrotropin-releasing hormone
VIPR2	vasoactive intestinal peptide receptor 2
WISP1	WNT1 inducible signaling pathway protein 1
WISP2	WNT1 inducible signaling pathway protein 2
AREG	amphiregulin (schwannoma-derived growth factor)
PCDH1	protocadherin 1 (cadherin-like 1)
BMP3	bone morphogenetic protein 3 (osteogenic)
C1QA	complement component 1, q subcomponent, A chain
PRSS2	protease, serine, 2 (trypsin 2)
APOA4	apolipoprotein A-IV
PRSS3	protease, serine, 3 (mesotrypsin)
CTRL	chymotrypsin-like
LDLR	low density lipoprotein receptor (familial hypercholesterolemia)
PPY	pancreatic polypeptide
CTSE	cathepsin E
MUC2	mucin 2, oligomeric mucus/gel-forming
MEP1A	meprin A, alpha (PABA peptide hydrolase)
DERL1	Der1-like domain family, member 1
SELS	-
REN	renin
ACE	angiotensin I converting enzyme (peptidyl-dipeptidase A) 1
DERL2	Der1-like domain family, member 2
ANGPTL3	angiopoietin-like 3
CLDN16	claudin 16
HPX	hemopexin
BDKRB1	bradykinin receptor B1
CACNA1C	calcium channel, voltage-dependent, L type, alpha 1C subunit
CP	ceruloplasmin (ferroxidase)
TFR2	transferrin receptor 2
SLC9A1	solute carrier family 9 (sodium/hydrogen exchanger), member 1 (antiporter, Na+/H+, amiloride sensitive)
BNIP3	BCL2/adenovirus E1B 19kDa interacting protein 3
RHAG	Rh-associated glycoprotein
SLC4A1	solute carrier family 4, anion exchanger, member 1 (erythrocyte membrane protein band 3, Diego blood group)
APOA2	apolipoprotein A-II
LCAT	lecithin-cholesterol acyltransferase
SLC2A4	solute carrier family 2 (facilitated glucose transporter), member 4
USH2A	Usher syndrome 2A (autosomal recessive, mild)
HCLS1	hematopoietic cell-specific Lyn substrate 1
DFNB31	deafness, autosomal recessive 31
CHGA	chromogranin A (parathyroid secretory protein 1)
KEL	Kell blood group, metallo-endopeptidase
SERTAD3	SERTA domain containing 3
BACE2	beta-site APP-cleaving enzyme 2
BMP1	bone morphogenetic protein 1
ADAMTS4	ADAM metallopeptidase with thrombospondin type 1 motif, 4
TIMP1	TIMP metallopeptidase inhibitor 1
DNAJC1	DnaJ (Hsp40) homolog, subfamily C, member 1
SIAH2	seven in absentia homolog 2 (Drosophila)
CTSG	cathepsin G
CTSS	cathepsin S
MMP9	matrix metallopeptidase 9 (gelatinase B, 92kDa gelatinase, 92kDa type IV collagenase)
IDE	insulin-degrading enzyme
ADAMTS13	ADAM metallopeptidase with thrombospondin type 1 motif, 13
PARK2	Parkinson disease (autosomal recessive, juvenile) 2, parkin
EDEM1	ER degradation enhancer, mannosidase alpha-like 1
UBE2G1	ubiquitin-conjugating enzyme E2G 1 (UBC7 homolog, yeast)
UBE2G2	ubiquitin-conjugating enzyme E2G 2 (UBC7 homolog, yeast)
MMP11	matrix metallopeptidase 11 (stromelysin 3)
CTSB	cathepsin B
FBXO2	F-box protein 2
ADAMTS5	ADAM metallopeptidase with thrombospondin type 1 motif, 5 (aggrecanase-2)
BLMH	bleomycin hydrolase
CFD	complement factor D (adipsin)
CPB2	carboxypeptidase B2 (plasma, carboxypeptidase U)
CTRC	chymotrypsin C (caldecrin)
CTSK	cathepsin K (pycnodysostosis)
HGFAC	HGF activator
KLKB1	kallikrein B, plasma (Fletcher factor) 1
LCN1	lipocalin 1 (tear prealbumin)
MBTPS1	membrane-bound transcription factor peptidase, site 1
MMP1	matrix metallopeptidase 1 (interstitial collagenase)
MMP10	matrix metallopeptidase 10 (stromelysin 2)
MMP12	matrix metallopeptidase 12 (macrophage elastase)
MMP13	matrix metallopeptidase 13 (collagenase 3)
MMP14	matrix metallopeptidase 14 (membrane-inserted)
MMP2	matrix metallopeptidase 2 (gelatinase A, 72kDa gelatinase, 72kDa type IV collagenase)
MMP20	matrix metallopeptidase 20 (enamelysin)
MMP3	matrix metallopeptidase 3 (stromelysin 1, progelatinase)
MMP7	matrix metallopeptidase 7 (matrilysin, uterine)
MMP8	matrix metallopeptidase 8 (neutrophil collagenase)
PAPPA2	pappalysin 2
NF2	neurofibromin 2 (bilateral acoustic neuroma)
ITGB1BP1	integrin beta 1 binding protein 1
OPHN1	oligophrenin 1
SLIT1	slit homolog 1 (Drosophila)
FEZ1	fasciculation and elongation protein zeta 1 (zygin I)
NRP2	neuropilin 2
NRXN3	neurexin 3
LAMC1	laminin, gamma 1 (formerly LAMB2)
LAMB1	laminin, beta 1
AMOT	angiomotin
S100P	S100 calcium binding protein P
ITGB1	integrin, beta 1 (fibronectin receptor, beta polypeptide, antigen CD29 includes MDF2, MSK12)
WNT1	wingless-type MMTV integration site family, member 1
ABI3	ABI gene family, member 3
NRD1	nardilysin (N-arginine dibasic convertase)
UCN2	urocortin 2
BMP7	bone morphogenetic protein 7 (osteogenic protein 1)
HGF	hepatocyte growth factor (hepapoietin A; scatter factor)
COL13A1	collagen, type XIII, alpha 1
ACTN2	actinin, alpha 2
ACTN3	actinin, alpha 3
PKD2	polycystic kidney disease 2 (autosomal dominant)
ITGA7	integrin, alpha 7
FBLN5	fibulin 5
ITGA10	integrin, alpha 10
ITGA3	integrin, alpha 3 (antigen CD49C, alpha 3 subunit of VLA-3 receptor)
CLDN4	claudin 4
CLDN3	claudin 3
CLDN1	claudin 1
CLDN11	claudin 11 (oligodendrocyte transmembrane protein)
CLDN2	claudin 2
CLDN5	claudin 5 (transmembrane protein deleted in velocardiofacial syndrome)
CLDN6	claudin 6
CLDN7	claudin 7
CLDN8	claudin 8
ARHGAP27	Rho GTPase activating protein 27
IGF2R	insulin-like growth factor 2 receptor
CLTCL1	clathrin, heavy chain-like 1
LRP2	low density lipoprotein-related protein 2
AP1S1	adaptor-related protein complex 1, sigma 1 subunit
ASGR1	asialoglycoprotein receptor 1
RAMP2	receptor (calcitonin) activity modifying protein 2
RAMP3	receptor (calcitonin) activity modifying protein 3
SORL1	sortilin-related receptor, L(DLR class) A repeats-containing
FCN1	ficolin (collagen/fibrinogen domain containing) 1
ELMO1	engulfment and cell motility 1
GULP1	GULP, engulfment adaptor PTB domain containing 1
TNFSF13	tumor necrosis factor (ligand) superfamily, member 13
CD74	CD74 molecule, major histocompatibility complex, class II invariant chain
APOF	apolipoprotein F
PSAP	prosaposin (variant Gaucher disease and variant metachromatic leukodystrophy)
IGF1	insulin-like growth factor 1 (somatomedin C)
BMP4	bone morphogenetic protein 4
MGP	matrix Gla protein
OSTF1	osteoclast stimulating factor 1
DMP1	dentin matrix acidic phosphoprotein
SPARC	secreted protein, acidic, cysteine-rich (osteonectin)
BMPR1B	bone morphogenetic protein receptor, type IB
COMP	cartilage oligomeric matrix protein
IGFBP4	insulin-like growth factor binding protein 4
TNFRSF11B	tumor necrosis factor receptor superfamily, member 11b (osteoprotegerin)
FBN1	fibrillin 1
KIAA1217	KIAA1217
CLEC3B	C-type lectin domain family 3, member B
COL1A2	collagen, type I, alpha 2
COL2A1	collagen, type II, alpha 1 (primary osteoarthritis, spondyloepiphyseal dysplasia, congenital)
COL9A2	collagen, type IX, alpha 2
PRELP	proline/arginine-rich end leucine-rich repeat protein
FGF10	fibroblast growth factor 10
NME1	non-metastatic cells 1, protein (NM23A) expressed in
LAMA1	laminin, alpha 1
EBI3	Epstein-Barr virus induced gene 3
CD81	CD81 molecule
EDN1	endothelin 1
VEGFB	vascular endothelial growth factor B
CSF3	colony stimulating factor 3 (granulocyte)
LRP5	low density lipoprotein receptor-related protein 5
CAPNS1	calpain, small subunit 1
FIGF	c-fos induced growth factor (vascular endothelial growth factor D)
PRTN3	proteinase 3 (serine proteinase, neutrophil, Wegener granulomatosis autoantigen)
VAPB	VAMP (vesicle-associated membrane protein)-associated protein B and C
DERL3	Der1-like domain family, member 3
ARHGDIB	Rho GDP dissociation inhibitor (GDI) beta
ARHGDIG	Rho GDP dissociation inhibitor (GDI) gamma
TGFBI	transforming growth factor, beta-induced, 68kDa
DLL1	delta-like 1 (Drosophila)
IGFBP3	insulin-like growth factor binding protein 3
FCGRT	Fc fragment of IgG, receptor, transporter, alpha
FSHB	follicle stimulating hormone, beta polypeptide
OXTR	oxytocin receptor
RPL29	ribosomal protein L29
SCGB1A1	secretoglobin, family 1A, member 1 (uteroglobin)
PZP	pregnancy-zone protein
DMPK	dystrophia myotonica-protein kinase
KCNH2	potassium voltage-gated channel, subfamily H (eag-related), member 2
KCNJ12	potassium inwardly-rectifying channel, subfamily J, member 12
SCN5A	sodium channel, voltage-gated, type V, alpha (long QT syndrome 3)
RYR2	ryanodine receptor 2 (cardiac)
FST	follistatin
DLG1	discs, large homolog 1 (Drosophila)
REG3A	regenerating islet-derived 3 alpha
PKHD1	polycystic kidney and hepatic disease 1 (autosomal recessive)
RYR1	ryanodine receptor 1 (skeletal)
TRPC5	transient receptor potential cation channel, subfamily C, member 5
ATP2A3	ATPase, Ca++ transporting, ubiquitous
CACNA1D	calcium channel, voltage-dependent, L type, alpha 1D subunit
RYR3	ryanodine receptor 3
TRPC1	transient receptor potential cation channel, subfamily C, member 1
TRPC4	transient receptor potential cation channel, subfamily C, member 4
PTPLAD1	protein tyrosine phosphatase-like A domain containing 1
RHOB	ras homolog gene family, member B
CDC42BPG	CDC42 binding protein kinase gamma (DMPK-like)
CHP	-
ARFIP2	ADP-ribosylation factor interacting protein 2 (arfaptin 2)
KRIT1	KRIT1, ankyrin repeat containing
CANX	calnexin
GNG3	guanine nucleotide binding protein (G protein), gamma 3
TLR4	toll-like receptor 4
TLR1	toll-like receptor 1
C9	complement component 9
COL4A3	collagen, type IV, alpha 3 (Goodpasture antigen)
COL4A2	collagen, type IV, alpha 2
PMAIP1	phorbol-12-myristate-13-acetate-induced protein 1
APOC2	apolipoprotein C-II
ST6GAL1	ST6 beta-galactosamide alpha-2,6-sialyltranferase 1
LTF	lactotransferrin
IL32	interleukin 32
GTPBP1	GTP binding protein 1
MADCAM1	mucosal vascular addressin cell adhesion molecule 1
SEMA3C	sema domain, immunoglobulin domain (Ig), short basic domain, secreted, (semaphorin) 3C
NCF4	neutrophil cytosolic factor 4, 40kDa
CST7	cystatin F (leukocystatin)
DPP4	dipeptidyl-peptidase 4 (CD26, adenosine deaminase complexing protein 2)
FCGR3B	Fc fragment of IgG, low affinity IIIb, receptor (CD16b)
HLA-DRB3	major histocompatibility complex, class II, DR beta 3
IL1R2	interleukin 1 receptor, type II
VTN	vitronectin
GJC1	gap junction protein, chi 1, 31.9kDa (connexin 31.9)
TJP1	tight junction protein 1 (zona occludens 1)
TLN2	talin 2
BAI1	brain-specific angiogenesis inhibitor 1
ANK1	ankyrin 1, erythrocytic
ITLN1	intelectin 1 (galactofuranose binding)
CDH1	cadherin 1, type 1, E-cadherin (epithelial)
PRKACG	protein kinase, cAMP-dependent, catalytic, gamma
CSDE1	cold shock domain containing E1, RNA-binding
ADAM2	ADAM metallopeptidase domain 2 (fertilin beta)
AKAP3	A kinase (PRKA) anchor protein 3
AMHR2	anti-Mullerian hormone receptor, type II
SEMG1	semenogelin I
NAPA	N-ethylmaleimide-sensitive factor attachment protein, alpha
NAPG	N-ethylmaleimide-sensitive factor attachment protein, gamma
GOSR1	golgi SNAP receptor complex member 1
COPG2	coatomer protein complex, subunit gamma 2
SERPINI1	serpin peptidase inhibitor, clade I (neuroserpin), member 1
CD3D	CD3d molecule, delta (CD3-TCR complex)
ATP2B2	ATPase, Ca++ transporting, plasma membrane 2
GOSR2	golgi SNAP receptor complex member 2
VAPA	VAMP (vesicle-associated membrane protein)-associated protein A, 33kDa
EEA1	early endosome antigen 1, 162kD
LRP8	low density lipoprotein receptor-related protein 8, apolipoprotein e receptor
SERP1	-
CAMP	cathelicidin antimicrobial peptide
CFP	complement factor properdin
ABCE1	ATP-binding cassette, sub-family E (OABP), member 1
LIN7A	lin-7 homolog A (C. elegans)
NPHS1	nephrosis 1, congenital, Finnish type (nephrin)
NPHS2	nephrosis 2, idiopathic, steroid-resistant (podocin)
NAGPA	N-acetylglucosamine-1-phosphodiester alpha-N-acetylglucosaminidase
PPBP	pro-platelet basic protein (chemokine (C-X-C motif) ligand 7)
IVL	involucrin
CSTA	cystatin A (stefin A)
LOR	loricrin
TGM1	transglutaminase 1 (K polypeptide epidermal type I, protein-glutamine-gamma-glutamyltransferase)
AMBP	alpha-1-microglobulin/bikunin precursor
RAD1	RAD1 homolog (S. pombe)
MAP4K4	mitogen-activated protein kinase kinase kinase kinase 4
ZDHHC17	zinc finger, DHHC-type containing 17
LGALS1	lectin, galactoside-binding, soluble, 1 (galectin 1)
ECM1	extracellular matrix protein 1
LGALS9	lectin, galactoside-binding, soluble, 9 (galectin 9)
MYD88	myeloid differentiation primary response gene (88)
TICAM2	toll-like receptor adaptor molecule 2
ADAM9	ADAM metallopeptidase domain 9 (meltrin gamma)
PRKAR2B	protein kinase, cAMP-dependent, regulatory, type II, beta
SH3BP5	SH3-domain binding protein 5 (BTK-associated)
COL18A1	collagen, type XVIII, alpha 1
STX2	syntaxin 2
ELN	elastin (supravalvular aortic stenosis, Williams-Beuren syndrome)
COL5A3	collagen, type V, alpha 3
COL9A1	collagen, type IX, alpha 1
DCN	decorin
ITGAX	integrin, alpha X (complement component 3 receptor 4 subunit)
BTG2	BTG family, member 2
IGFBP6	insulin-like growth factor binding protein 6
IGFBP7	insulin-like growth factor binding protein 7
KCNA3	potassium voltage-gated channel, shaker-related subfamily, member 3
KCNA4	potassium voltage-gated channel, shaker-related subfamily, member 4
KCNA5	potassium voltage-gated channel, shaker-related subfamily, member 5
KCNJ10	potassium inwardly-rectifying channel, subfamily J, member 10
KCNJ15	potassium inwardly-rectifying channel, subfamily J, member 15
KCNJ2	potassium inwardly-rectifying channel, subfamily J, member 2
KCNJ3	potassium inwardly-rectifying channel, subfamily J, member 3
KCNJ4	potassium inwardly-rectifying channel, subfamily J, member 4
KCNJ5	potassium inwardly-rectifying channel, subfamily J, member 5
KCNJ6	potassium inwardly-rectifying channel, subfamily J, member 6
NCF2	neutrophil cytosolic factor 2 (65kDa, chronic granulomatous disease, autosomal 2)
HP	haptoglobin
MAPK12	mitogen-activated protein kinase 12
MYOZ1	myozenin 1
DGKD	diacylglycerol kinase, delta 130kDa
GOPC	golgi associated PDZ and coiled-coil motif containing
UPF1	UPF1 regulator of nonsense transcripts homolog (yeast)
ETF1	eukaryotic translation termination factor 1
MAZ	MYC-associated zinc finger protein (purine-binding transcription factor)
SCN4A	sodium channel, voltage-gated, type IV, alpha
SLC31A2	solute carrier family 31 (copper transporters), member 2
EDA	ectodysplasin A
COL1A1	collagen, type I, alpha 1
COL7A1	collagen, type VII, alpha 1 (epidermolysis bullosa, dystrophic, dominant and recessive)
KRT13	keratin 13
KRT34	keratin 34
LAMA3	laminin, alpha 3
LAMB3	laminin, beta 3
LAMC2	laminin, gamma 2
KRT6A	keratin 6A
ZBTB7B	zinc finger and BTB domain containing 7B
SORBS3	sorbin and SH3 domain containing 3
PLA2G1B	phospholipase A2, group IB (pancreas)
SPTA1	spectrin, alpha, erythrocytic 1 (elliptocytosis 2)
HSP90B1	heat shock protein 90kDa beta (Grp94), member 1
FNTB	farnesyltransferase, CAAX box, beta
CFTR	cystic fibrosis transmembrane conductance regulator (ATP-binding cassette sub-family C, member 7)
GPR143	G protein-coupled receptor 143
ACCN3	amiloride-sensitive cation channel 3
RCVRN	recoverin
CRYAA	crystallin, alpha A
SGCA	sarcoglycan, alpha (50kDa dystrophin-associated glycoprotein)
WFS1	Wolfram syndrome 1 (wolframin)
GJA8	gap junction protein, alpha 8, 50kDa (connexin 50)
DIAPH1	diaphanous homolog 1 (Drosophila)
LUM	lumican
NTSR2	neurotensin receptor 2
COL3A1	collagen, type III, alpha 1 (Ehlers-Danlos syndrome type IV, autosomal dominant)
GNAO1	guanine nucleotide binding protein (G protein), alpha activating activity polypeptide O
LPA	lipoprotein, Lp(a)
SERPING1	serpin peptidase inhibitor, clade G (C1 inhibitor), member 1, (angioedema, hereditary)
SNTB1	syntrophin, beta 1 (dystrophin-associated protein A1, 59kDa, basic component 1)
AP1M2	adaptor-related protein complex 1, mu 2 subunit
ALDH6A1	aldehyde dehydrogenase 6 family, member A1
QDPR	quinoid dihydropteridine reductase
MOCOS	molybdenum cofactor sulfurase
AMPD3	adenosine monophosphate deaminase (isoform E)
MPDU1	mannose-P-dolichol utilization defect 1
ICMT	isoprenylcysteine carboxyl methyltransferase
TRAM1	translocation associated membrane protein 1
HBEGF	heparin-binding EGF-like growth factor
ITGB1BP2	integrin beta 1 binding protein (melusin) 2
KITLG	KIT ligand
LPXN	leupaxin
ACCN2	amiloride-sensitive cation channel 2, neuronal
CACNA1I	calcium channel, voltage-dependent, alpha 1I subunit
CCK	cholecystokinin
CDC42SE1	CDC42 small effector 1
DDR2	discoidin domain receptor family, member 2
GABRB1	gamma-aminobutyric acid (GABA) A receptor, beta 1
GABRB3	gamma-aminobutyric acid (GABA) A receptor, beta 3
GIP	gastric inhibitory polypeptide
GNA11	guanine nucleotide binding protein (G protein), alpha 11 (Gq class)
GNA13	guanine nucleotide binding protein (G protein), alpha 13
GNA14	guanine nucleotide binding protein (G protein), alpha 14
GNG10	guanine nucleotide binding protein (G protein), gamma 10
GNG11	guanine nucleotide binding protein (G protein), gamma 11
IGFALS	insulin-like growth factor binding protein, acid labile subunit
IGFBP1	insulin-like growth factor binding protein 1
MPP2	membrane protein, palmitoylated 2 (MAGUK p55 subfamily member 2)
OR3A2	olfactory receptor, family 3, subfamily A, member 2
RALB	v-ral simian leukemia viral oncogene homolog B (ras related; GTP binding protein)
RAP1A	RAP1A, member of RAS oncogene family
RAP2A	RAP2A, member of RAS oncogene family
RYK	RYK receptor-like tyrosine kinase
TNFRSF10C	tumor necrosis factor receptor superfamily, member 10c, decoy without an intracellular domain
COL6A3	collagen, type VI, alpha 3
TAGLN	transgelin
CIB1	calcium and integrin binding 1 (calmyrin)
SETX	senataxin
XRCC6BP1	XRCC6 binding protein 1
ASF1A	ASF1 anti-silencing function 1 homolog A (S. cerevisiae)
CUBN	cubilin (intrinsic factor-cobalamin receptor)
GC	group-specific component (vitamin D binding protein)
NOX1	NADPH oxidase 1
AANAT	arylalkylamine N-acetyltransferase
ABCB4	ATP-binding cassette, sub-family B (MDR/TAP), member 4
ABCB1	ATP-binding cassette, sub-family B (MDR/TAP), member 1
NUP214	nucleoporin 214kDa
AP1G1	adaptor-related protein complex 1, gamma 1 subunit
GGA1	golgi associated, gamma adaptin ear containing, ARF binding protein 1
LGTN	ligatin
TOMM20	translocase of outer mitochondrial membrane 20 homolog (yeast)
LIPC	lipase, hepatic
TSPAN7	tetraspanin 7
GPC4	glypican 4
FGF8	fibroblast growth factor 8 (androgen-induced)
FGF1	fibroblast growth factor 1 (acidic)
CPM	carboxypeptidase M
FBN2	fibrillin 2 (congenital contractural arachnodactyly)
GPC3	glypican 3
KRT35	keratin 35
MYOC	myocilin, trabecular meshwork inducible glucocorticoid response
LGI1	leucine-rich, glioma inactivated 1
SPOCK1	sparc/osteonectin, cwcv and kazal-like domains proteoglycan (testican) 1
CREG1	cellular repressor of E1A-stimulated genes 1
LRP1	low density lipoprotein-related protein 1 (alpha-2-macroglobulin receptor)
DAB2	disabled homolog 2, mitogen-responsive phosphoprotein (Drosophila)
MIA	melanoma inhibitory activity
SERPINB13	serpin peptidase inhibitor, clade B (ovalbumin), member 13
CHST9	carbohydrate (N-acetylgalactosamine 4-0) sulfotransferase 9
LECT1	leukocyte cell derived chemotaxin 1
TBR1	T-box, brain, 1
SMG7	Smg-7 homolog, nonsense mediated mRNA decay factor (C. elegans)
PFKFB1	6-phosphofructo-2-kinase/fructose-2,6-biphosphatase 1
2012-09-04	septin 4
MAD2L2	MAD2 mitotic arrest deficient-like 2 (yeast)
PPM1G	protein phosphatase 1G (formerly 2C), magnesium-dependent, gamma isoform
CPT1B	carnitine palmitoyltransferase 1B (muscle)
PLP2	proteolipid protein 2 (colonic epithelium-enriched)
SLC1A5	solute carrier family 1 (neutral amino acid transporter), member 5
SLC6A3	solute carrier family 6 (neurotransmitter transporter, dopamine), member 3
FUT1	fucosyltransferase 1 (galactoside 2-alpha-L-fucosyltransferase, H blood group)
AGA	aspartylglucosaminidase
PNMA1	paraneoplastic antigen MA1
SERPINA5	serpin peptidase inhibitor, clade A (alpha-1 antiproteinase, antitrypsin), member 5
ADAM22	ADAM metallopeptidase domain 22
ADAM23	ADAM metallopeptidase domain 23
JARID2	jumonji, AT rich interactive domain 2
SNTG2	syntrophin, gamma 2
PHYH	phytanoyl-CoA 2-hydroxylase
GDA	guanine deaminase
FGF19	fibroblast growth factor 19
L1CAM	L1 cell adhesion molecule
NOG	noggin
SCN8A	sodium channel, voltage gated, type VIII, alpha
SIM2	single-minded homolog 2 (Drosophila)
PDIA6	protein disulfide isomerase family A, member 6
ST13	suppression of tumorigenicity 13 (colon carcinoma) (Hsp70 interacting protein)
TTC1	tetratricopeptide repeat domain 1
SLC7A6	solute carrier family 7 (cationic amino acid transporter, y+ system), member 6
TCEB2	transcription elongation factor B (SIII), polypeptide 2 (18kDa, elongin B)
MATN1	matrilin 1, cartilage matrix protein
TSPAN4	tetraspanin 4
ADI1	acireductone dioxygenase 1
GLUD2	glutamate dehydrogenase 2
NDOR1	NADPH dependent diflavin oxidoreductase 1
CROT	carnitine O-octanoyltransferase
GGT1	gamma-glutamyltransferase 1
GLS2	glutaminase 2 (liver, mitochondrial)
ABCB11	ATP-binding cassette, sub-family B (MDR/TAP), member 11
ABCC2	ATP-binding cassette, sub-family C (CFTR/MRP), member 2
CLCA1	chloride channel, calcium activated, family member 1
CLCA2	chloride channel, calcium activated, family member 2
KISS1	KiSS-1 metastasis-suppressor
PTPN5	protein tyrosine phosphatase, non-receptor type 5 (striatum-enriched)
PTPRM	protein tyrosine phosphatase, receptor type, M
ARVCF	armadillo repeat gene deletes in velocardiofacial syndrome
PCOLCE	procollagen C-endopeptidase enhancer
THBS1	thrombospondin 1
DCC	deleted in colorectal carcinoma
SERPINB2	serpin peptidase inhibitor, clade B (ovalbumin), member 2
DRAP1	DR1-associated protein 1 (negative cofactor 2 alpha)
NKX2-5	NK2 transcription factor related, locus 5 (Drosophila)
ZHX2	zinc fingers and homeoboxes 2
AKR7A2	aldo-keto reductase family 7, member A2 (aflatoxin aldehyde reductase)
APOC1	apolipoprotein C-I
APOD	apolipoprotein D
MTTP	microsomal triglyceride transfer protein
OCRL	oculocerebrorenal syndrome of Lowe
PLTP	phospholipid transfer protein
NT5E	5'-nucleotidase, ecto (CD73)
GEMIN4	gem (nuclear organelle) associated protein 4
CHD3	chromodomain helicase DNA binding protein 3
TCEB3	transcription elongation factor B (SIII), polypeptide 3 (110kDa, elongin A)
ART1	ADP-ribosyltransferase 1
LOX	lysyl oxidase
MMP15	matrix metallopeptidase 15 (membrane-inserted)
A2M	alpha-2-macroglobulin
ABCA6	ATP-binding cassette, sub-family A (ABC1), member 6
ACP5	acid phosphatase 5, tartrate resistant
ADA	adenosine deaminase
ADAM19	ADAM metallopeptidase domain 19 (meltrin beta)
ADCY2	adenylate cyclase 2 (brain)
ADCY6	adenylate cyclase 6
ANKRA2	ankyrin repeat, family A (RFXANK-like), 2
ANTXR2	anthrax toxin receptor 2
APBB1IP	amyloid beta (A4) precursor protein-binding, family B, member 1 interacting protein
APOA1BP	apolipoprotein A-I binding protein
APOB	apolipoprotein B (including Ag(x) antigen)
APOH	apolipoprotein H (beta-2-glycoprotein I)
ARHGEF18	rho/rac guanine nucleotide exchange factor (GEF) 18
ATP2B4	ATPase, Ca++ transporting, plasma membrane 4
ATRNL1	attractin-like 1
AZGP1	alpha-2-glycoprotein 1, zinc
BCAP29	B-cell receptor-associated protein 29
BCAP31	B-cell receptor-associated protein 31
BGLAP	bone gamma-carboxyglutamate (gla) protein (osteocalcin)
BGN	biglycan
BMPER	BMP binding endothelial regulator
BPI	bactericidal/permeability-increasing protein
C12ORF35	chromosome 12 open reading frame 35
C16ORF70	chromosome 16 open reading frame 70
C1ORF116	chromosome 1 open reading frame 116
C1QB	complement component 1, q subcomponent, B chain
C1QC	complement component 1, q subcomponent, C chain
C1R	complement component 1, r subcomponent
C1S	complement component 1, s subcomponent
C3ORF10	chromosome 3 open reading frame 10
C4A	complement component 4A (Rodgers blood group)
C4BPA	complement component 4 binding protein, alpha
C7	complement component 7
C8B	complement component 8, beta polypeptide
CABP1	calcium binding protein 1 (calbrain)
CACNA2D2	calcium channel, voltage-dependent, alpha 2/delta subunit 2
CACNG2	calcium channel, voltage-dependent, gamma subunit 2
CALB2	calbindin 2, 29kDa (calretinin)
CAMTA1	calmodulin binding transcription activator 1
CASK	calcium/calmodulin-dependent serine protein kinase (MAGUK family)
CCDC53	coiled-coil domain containing 53
CCL3L1	chemokine (C-C motif) ligand 3-like 1
CD151	CD151 molecule (Raph blood group)
CD200	CD200 molecule
CD44	CD44 molecule (Indian blood group)
CD46	CD46 molecule, complement regulatory protein
CD53	CD53 molecule
CD63	CD63 molecule
CD82	CD82 molecule
CDC45L	CDC45 cell division cycle 45-like (S. cerevisiae)
CDGAP	-
CDH12	cadherin 12, type 2 (N-cadherin 2)
CDH15	cadherin 15, M-cadherin (myotubule)
CDH3	cadherin 3, type 1, P-cadherin (placental)
CFB	complement factor B
CFH	complement factor H
CFHR3	complement factor H-related 3
CFHR4	complement factor H-related 4
CFHR5	complement factor H-related 5
CFI	complement factor I
CHAD	chondroadherin
CHMP4C	chromatin modifying protein 4C
CHRDL2	chordin-like 2
CKAP2	cytoskeleton associated protein 2
CLINT1	clathrin interactor 1
CLU	clusterin
CMA1	chymase 1, mast cell
CNKSR2	connector enhancer of kinase suppressor of Ras 2
CNOT1	CCR4-NOT transcription complex, subunit 1
CNOT6	CCR4-NOT transcription complex, subunit 6
CNTNAP2	contactin associated protein-like 2
CNTNAP4	contactin associated protein-like 4
COL14A1	collagen, type XIV, alpha 1 (undulin)
COL23A1	collagen, type XXIII, alpha 1
COL25A1	collagen, type XXV, alpha 1
COL4A1	collagen, type IV, alpha 1
COL4A5	collagen, type IV, alpha 5 (Alport syndrome)
COL4A6	collagen, type IV, alpha 6
COL5A1	collagen, type V, alpha 1
COL6A1	collagen, type VI, alpha 1
COL6A2	collagen, type VI, alpha 2
COL8A1	collagen, type VIII, alpha 1
COL9A3	collagen, type IX, alpha 3
CORO1A	coronin, actin binding protein, 1A
CPAMD8	C3 and PZP-like, alpha-2-macroglobulin domain containing 8
CPE	carboxypeptidase E
CPN1	carboxypeptidase N, polypeptide 1, 50kD
CR1	complement component (3b/4b) receptor 1 (Knops blood group)
CR2	complement component (3d/Epstein Barr virus) receptor 2
CRIPT	cysteine-rich PDZ-binding protein
CSF2	colony stimulating factor 2 (granulocyte-macrophage)
CST3	cystatin C (amyloid angiopathy and cerebral hemorrhage)
CTAG1A	cancer/testis antigen 1A
CTAGE5	CTAGE family, member 5
CTRB1	chymotrypsinogen B1
CTSD	cathepsin D (lysosomal aspartyl peptidase)
CUGBP1	CUG triplet repeat, RNA binding protein 1
CYBA	cytochrome b-245, alpha polypeptide
DDX18	DEAD (Asp-Glu-Ala-Asp) box polypeptide 18
DDX56	DEAD (Asp-Glu-Ala-Asp) box polypeptide 56
DHFRP1	dihydrofolate reductase pseudogene 1
DIP2A	DIP2 disco-interacting protein 2 homolog A (Drosophila)
DISC1	disrupted in schizophrenia 1
DKK1	dickkopf homolog 1 (Xenopus laevis)
DLG2	discs, large homolog 2, chapsyn-110 (Drosophila)
DLG3	discs, large homolog 3 (neuroendocrine-dlg, Drosophila)
DMWD	dystrophia myotonica-containing WD repeat motif
DNAJC14	DnaJ (Hsp40) homolog, subfamily C, member 14
DNM3	dynamin 3
DNTT	deoxynucleotidyltransferase, terminal
DPT	dermatopontin
DYNLL2	dynein, light chain, LC8-type 2
EBNA1BP2	EBNA1 binding protein 2
ECE1	endothelin converting enzyme 1
EDIL3	EGF-like repeats and discoidin I-like domains 3
EED	embryonic ectoderm development
EHD2	EH-domain containing 2
EMG1	EMG1 nucleolar protein homolog (S. cerevisiae)
EMILIN1	elastin microfibril interfacer 1
EPB42	erythrocyte membrane protein band 4.2
ESM1	endothelial cell-specific molecule 1
EXOC4	exocyst complex component 4
F11	coagulation factor XI (plasma thromboplastin antecedent)
F3	coagulation factor III (thromboplastin, tissue factor)
FAM113B	family with sequence similarity 113, member B
FAP	fibroblast activation protein, alpha
FBLN1	fibulin 1
FBLN2	fibulin 2
FCER2	Fc fragment of IgE, low affinity II, receptor for (CD23)
FCHSD2	FCH and double SH3 domains 2
FGA	fibrinogen alpha chain
FGB	fibrinogen beta chain
FGF23	fibroblast growth factor 23
FGFR2	fibroblast growth factor receptor 2 (bacteria-expressed kinase, keratinocyte growth factor receptor, craniofacial dysostosis 1, Crouzon syndrome, Pfeiffer syndrome, Jackson-Weiss syndrome)
FGFRL1	fibroblast growth factor receptor-like 1
FGG	fibrinogen gamma chain
FHOD1	formin homology 2 domain containing 1
FKBP1B	FK506 binding protein 1B, 12.6 kDa
FLG	filaggrin
FLJ20701	-
FMNL1	formin-like 1
FN1	fibronectin 1
FSTL3	follistatin-like 3 (secreted glycoprotein)
FUNDC2	FUN14 domain containing 2
FZD1	frizzled homolog 1 (Drosophila)
FZD7	frizzled homolog 7 (Drosophila)
FZD8	frizzled homolog 8 (Drosophila)
GAL	galanin
GAST	gastrin
GBP1	guanylate binding protein 1, interferon-inducible, 67kDa
GCKR	glucokinase (hexokinase 4) regulator
GEFT	-
GFAP	glial fibrillary acidic protein
GGA2	golgi associated, gamma adaptin ear containing, ARF binding protein 2
GIF	gastric intrinsic factor (vitamin B synthesis)
GIPC1	GIPC PDZ domain containing family, member 1
GJB3	gap junction protein, beta 3, 31kDa (connexin 31)
GNAI1	guanine nucleotide binding protein (G protein), alpha inhibiting activity polypeptide 1
GNG13	guanine nucleotide binding protein (G protein), gamma 13
GNG2	guanine nucleotide binding protein (G protein), gamma 2
GNG5	guanine nucleotide binding protein (G protein), gamma 5
GNG8	guanine nucleotide binding protein (G protein), gamma 8
GNGT1	guanine nucleotide binding protein (G protein), gamma transducing activity polypeptide 1
GNGT2	guanine nucleotide binding protein (G protein), gamma transducing activity polypeptide 2
GP5	glycoprotein V (platelet)
GPC1	glypican 1
GPLD1	glycosylphosphatidylinositol specific phospholipase D1
GPR151	G protein-coupled receptor 151
GPR77	G protein-coupled receptor 77
GPRASP1	G protein-coupled receptor associated sorting protein 1
GPSM1	G-protein signalling modulator 1 (AGS3-like, C. elegans)
GRASP	GRP1 (general receptor for phosphoinositides 1)-associated scaffold protein
GREM2	gremlin 2, cysteine knot superfamily, homolog (Xenopus laevis)
GRIK5	glutamate receptor, ionotropic, kainate 5
GRN	granulin
GTPBP3	GTP binding protein 3 (mitochondrial)
GUCY1A2	guanylate cyclase 1, soluble, alpha 2
HABP2	hyaluronan binding protein 2
HAPLN1	hyaluronan and proteoglycan link protein 1
HAX1	HCLS1 associated protein X-1
HBA1	hemoglobin, alpha 1
HBZ	hemoglobin, zeta
HEXDC	hexosaminidase (glycosyl hydrolase family 20, catalytic domain) containing
HLA-DMA	major histocompatibility complex, class II, DM alpha
HLA-DMB	major histocompatibility complex, class II, DM beta
HLA-DOB	major histocompatibility complex, class II, DO beta
HLA-DQA1	major histocompatibility complex, class II, DQ alpha 1
HLA-DQA2	major histocompatibility complex, class II, DQ alpha 2
HLA-DQB1	major histocompatibility complex, class II, DQ beta 1
HPN	hepsin (transmembrane protease, serine 1)
HPR	haptoglobin-related protein
HRG	histidine-rich glycoprotein
HRH4	histamine receptor H4
HSD11B1	hydroxysteroid (11-beta) dehydrogenase 1
HSPG2	heparan sulfate proteoglycan 2 (perlecan)
ICAM2	intercellular adhesion molecule 2
ICAM3	intercellular adhesion molecule 3
ICAM4	intercellular adhesion molecule 4 (Landsteiner-Wiener blood group)
ICAM5	intercellular adhesion molecule 5, telencephalin
IGFBP2	insulin-like growth factor binding protein 2, 36kDa
IGFBP5	insulin-like growth factor binding protein 5
IGHA1	immunoglobulin heavy constant alpha 1
IGHD	immunoglobulin heavy constant delta
IGHG1	immunoglobulin heavy constant gamma 1 (G1m marker)
IGHG2	immunoglobulin heavy constant gamma 2 (G2m marker)
IGHM	immunoglobulin heavy constant mu
IGKC	immunoglobulin kappa constant
IGL@	immunoglobulin lambda locus
IGLC1	immunoglobulin lambda constant 1 (Mcg marker)
IGLL1	immunoglobulin lambda-like polypeptide 1
IGSF2	immunoglobulin superfamily, member 2
IGSF8	immunoglobulin superfamily, member 8
IL10RA	interleukin 10 receptor, alpha
IL1F10	interleukin 1 family, member 10 (theta)
IL1R1	interleukin 1 receptor, type I
IL1RN	interleukin 1 receptor antagonist
IL22	interleukin 22
IL28A	interleukin 28A (interferon, lambda 2)
IL28B	interleukin 28B (interferon, lambda 3)
IL8RA	interleukin 8 receptor, alpha
IL8RB	interleukin 8 receptor, beta
INADL	InaD-like (Drosophila)
ITGA1	integrin, alpha 1
ITGA2B	integrin, alpha 2b (platelet glycoprotein IIb of IIb/IIIa complex, antigen CD41)
ITGA4	integrin, alpha 4 (antigen CD49D, alpha 4 subunit of VLA-4 receptor)
ITGA5	integrin, alpha 5 (fibronectin receptor, alpha polypeptide)
ITGA8	integrin, alpha 8
ITGA9	integrin, alpha 9
ITGAL	integrin, alpha L (antigen CD11A (p180), lymphocyte function-associated antigen 1; alpha polypeptide)
ITGAM	integrin, alpha M (complement component 3 receptor 3 subunit)
ITGAV	integrin, alpha V (vitronectin receptor, alpha polypeptide, antigen CD51)
ITGB1BP3	integrin beta 1 binding protein 3
ITGB5	integrin, beta 5
ITGB6	integrin, beta 6
ITGB8	integrin, beta 8
ITIH1	inter-alpha (globulin) inhibitor H1
JAM2	junctional adhesion molecule 2
JAM3	junctional adhesion molecule 3
KCNJ9	potassium inwardly-rectifying channel, subfamily J, member 9
KEAP1	kelch-like ECH-associated protein 1
KHK	ketohexokinase (fructokinase)
KIAA0232	-
KIAA0391	KIAA0391
KIAA0754	-
KIAA1409	KIAA1409
KIAA1712	KIAA1712
KLHDC3	kelch domain containing 3
KLHL3	kelch-like 3 (Drosophila)
KLK1	kallikrein 1, renal/pancreas/salivary
KLK13	kallikrein 13
KLK2	kallikrein 2, prostatic
KLK3	kallikrein 3, (prostate specific antigen)
KRAS	v-Ki-ras2 Kirsten rat sarcoma viral oncogene homolog
KRT72	keratin 72
LACRT	lacritin
LAMA4	laminin, alpha 4
LAMA5	laminin, alpha 5
LAMB2	laminin, beta 2 (laminin S)
LCN2	lipocalin 2 (oncogene 24p3)
LCT	lactase
LDB3	LIM domain binding 3
LGALS3	lectin, galactoside-binding, soluble, 3 (galectin 3)
LGALS8	lectin, galactoside-binding, soluble, 8 (galectin 8)
LIN7B	lin-7 homolog B (C. elegans)
LMBR1L	limb region 1 homolog (mouse)-like
LOXL4	lysyl oxidase-like 4
LRFN1	leucine rich repeat and fibronectin type III domain containing 1
LRG1	leucine-rich alpha-2-glycoprotein 1
LRP12	low density lipoprotein-related protein 12
LRP2BP	LRP2 binding protein
LTBP1	latent transforming growth factor beta binding protein 1
M6PRBP1	mannose-6-phosphate receptor binding protein 1
MAG	myelin associated glycoprotein
MAGI3	membrane associated guanylate kinase, WW and PDZ domain containing 3
MASP1	mannan-binding lectin serine peptidase 1 (C4/C2 activating component of Ra-reactive factor)
MASP2	mannan-binding lectin serine peptidase 2
MATN2	matrilin 2
MCF2	MCF.2 cell line derived transforming sequence
MCF2L	MCF.2 cell line derived transforming sequence-like
MCFD2	multiple coagulation factor deficiency 2
MCHR2	melanin-concentrating hormone receptor 2
MESDC2	mesoderm development candidate 2
MFAP2	microfibrillar-associated protein 2
MFI2	antigen p97 (melanoma associated) identified by monoclonal antibodies 133.2 and 96.5
MFSD1	major facilitator superfamily domain containing 1
MIB1	mindbomb homolog 1 (Drosophila)
MLPH	melanophilin
MMP16	matrix metallopeptidase 16 (membrane-inserted)
MMP17	matrix metallopeptidase 17 (membrane-inserted)
MMP25	matrix metallopeptidase 25
MMP26	matrix metallopeptidase 26
MPP5	membrane protein, palmitoylated 5 (MAGUK p55 subfamily member 5)
MPP6	membrane protein, palmitoylated 6 (MAGUK p55 subfamily member 6)
MRAP	melanocortin 2 receptor accessory protein
MS4A5	membrane-spanning 4-domains, subfamily A, member 5
MSN	moesin
MST1	macrophage stimulating 1 (hepatocyte growth factor-like)
MTUS1	mitochondrial tumor suppressor 1
MUC13	mucin 13, cell surface associated
MUC16	mucin 16, cell surface associated
MUC7	mucin 7, secreted
MYL4	myosin, light chain 4, alkali; atrial, embryonic
MYOZ3	myozenin 3
NBR1	neighbor of BRCA1 gene 1
NDUFA4L2	NADH dehydrogenase (ubiquinone) 1 alpha subcomplex, 4-like 2
NDUFS6	NADH dehydrogenase (ubiquinone) Fe-S protein 6, 13kDa (NADH-coenzyme Q reductase)
NGB	neuroglobin
NID1	nidogen 1
NID2	nidogen 2 (osteonidogen)
NLGN2	neuroligin 2
NOS1AP	nitric oxide synthase 1 (neuronal) adaptor protein
NOV	nephroblastoma overexpressed gene
NOXA1	NADPH oxidase activator 1
NPFFR1	neuropeptide FF receptor 1
NRXN2	neurexin 2
NSF	N-ethylmaleimide-sensitive factor
NT5DC2	5'-nucleotidase domain containing 2
NTN1	netrin 1
NTS	neurotensin
NUCB1	nucleobindin 1
NUMB	numb homolog (Drosophila)
NUP88	nucleoporin 88kDa
OBSL1	obscurin-like 1
OLFM2	olfactomedin 2
OR2T6	olfactory receptor, family 2, subfamily T, member 6
OR8D2	olfactory receptor, family 8, subfamily D, member 2
OTUD4	OTU domain containing 4
P2RY13	purinergic receptor P2Y, G-protein coupled, 13
PALLD	palladin, cytoskeletal associated protein
PAN3	PAN3 polyA specific ribonuclease subunit homolog (S. cerevisiae)
PAPPA	pregnancy-associated plasma protein A, pappalysin 1
PARD6G	par-6 partitioning defective 6 homolog gamma (C. elegans)
PCF11	PCF11, cleavage and polyadenylation factor subunit, homolog (S. cerevisiae)
PCSK1N	proprotein convertase subtilisin/kexin type 1 inhibitor
PCSK4	proprotein convertase subtilisin/kexin type 4
PCSK7	proprotein convertase subtilisin/kexin type 7
PCTK2	PCTAIRE protein kinase 2
PDCL	phosducin-like
PDE4B	phosphodiesterase 4B, cAMP-specific (phosphodiesterase E4 dunce homolog, Drosophila)
PDGFB	platelet-derived growth factor beta polypeptide (simian sarcoma viral (v-sis) oncogene homolog)
PDYN	prodynorphin
PDZD2	PDZ domain containing 2
PEG3	paternally expressed 3
PEX5	peroxisomal biogenesis factor 5
PF4V1	platelet factor 4 variant 1
PFN1	profilin 1
PHC1	polyhomeotic homolog 1 (Drosophila)
PHC2	polyhomeotic homolog 2 (Drosophila)
PHC3	polyhomeotic homolog 3 (Drosophila)
PI3	peptidase inhibitor 3, skin-derived (SKALP)
PIP5K1C	phosphatidylinositol-4-phosphate 5-kinase, type I, gamma
PIP5KL1	phosphatidylinositol-4-phosphate 5-kinase-like 1
PKIB	protein kinase (cAMP-dependent, catalytic) inhibitor beta
PLA2G2A	phospholipase A2, group IIA (platelets, synovial fluid)
PLA2G4F	phospholipase A2, group IVF
PLCB1	phospholipase C, beta 1 (phosphoinositide-specific)
PLCB3	phospholipase C, beta 3 (phosphatidylinositol-specific)
PLEKHA6	pleckstrin homology domain containing, family A member 6
PNMA2	paraneoplastic antigen MA2
PON1	paraoxonase 1
PORCN	porcupine homolog (Drosophila)
PPL	periplakin
PRB3	proline-rich protein BstNI subfamily 3
PRB4	proline-rich protein BstNI subfamily 4
PRCP	prolylcarboxypeptidase (angiotensinase C)
PRDM16	PR domain containing 16
PRG2	proteoglycan 2, bone marrow (natural killer cell activator, eosinophil granule major basic protein)
PRIMA1	proline rich membrane anchor 1
PROZ	protein Z, vitamin K-dependent plasma glycoprotein
PTGDR	prostaglandin D2 receptor (DP)
PTGFRN	prostaglandin F2 receptor negative regulator
PTP4A2	protein tyrosine phosphatase type IVA, member 2
PTPLB	protein tyrosine phosphatase-like (proline instead of catalytic arginine), member b
PTPRN	protein tyrosine phosphatase, receptor type, N
PTPRS	protein tyrosine phosphatase, receptor type, S
PVR	poliovirus receptor
QTRTD1	queuine tRNA-ribosyltransferase domain containing 1
RAB10	RAB10, member RAS oncogene family
RAB8B	RAB8B, member RAS oncogene family
RALGDS	ral guanine nucleotide dissociation stimulator
RANBP3	RAN binding protein 3
RAPGEF5	Rap guanine nucleotide exchange factor (GEF) 5
RARSL	arginyl-tRNA synthetase-like
RASA2	RAS p21 protein activator 2
RASGRF1	Ras protein-specific guanine nucleotide-releasing factor 1
RASGRP2	RAS guanyl releasing protein 2 (calcium and DAG-regulated)
RASSF5	Ras association (RalGDS/AF-6) domain family 5
RAVER1	ribonucleoprotein, PTB-binding 1
RBP4	retinol binding protein 4, plasma
RCN3	reticulocalbin 3, EF-hand calcium binding domain
RDX	radixin
RECK	reversion-inducing-cysteine-rich protein with kazal motifs
RELN	reelin
RG9MTD1	RNA (guanine-9-) methyltransferase domain containing 1
RGS13	regulator of G-protein signalling 13
RGS7	regulator of G-protein signalling 7
RIC8A	resistance to inhibitors of cholinesterase 8 homolog A (C. elegans)
RING1	ring finger protein 1
RLF	rearranged L-myc fusion
RNASEL	ribonuclease L (2',5'-oligoisoadenylate synthetase-dependent)
RNF130	ring finger protein 130
RNF2	ring finger protein 2
RNF5	ring finger protein 5
RPH3A	rabphilin 3A homolog (mouse)
RXFP4	relaxin/insulin-like family peptide receptor 4
S100A10	S100 calcium binding protein A10
S100A13	S100 calcium binding protein A13
S100A3	S100 calcium binding protein A3
SAA4	serum amyloid A4, constitutive
SACS	spastic ataxia of Charlevoix-Saguenay (sacsin)
SAP30L	SAP30-like
SCARB2	scavenger receptor class B, member 2
SCFD1	sec1 family domain containing 1
SCN3A	sodium channel, voltage-gated, type III, alpha
SCT	secretin
SCYL3	SCY1-like 3 (S. cerevisiae)
SDC1	syndecan 1
SDC2	syndecan 2 (heparan sulfate proteoglycan 1, cell surface-associated, fibroglycan)
SEC61A2	Sec61 alpha 2 subunit (S. cerevisiae)
SEC61B	Sec61 beta subunit
SELL	selectin L (lymphocyte adhesion molecule 1)
SELP	selectin P (granule membrane protein 140kDa, antigen CD62)
SELPLG	selectin P ligand
SEMA3A	sema domain, immunoglobulin domain (Ig), short basic domain, secreted, (semaphorin) 3A
SEMA3F	sema domain, immunoglobulin domain (Ig), short basic domain, secreted, (semaphorin) 3F
SEMA4C	sema domain, immunoglobulin domain (Ig), transmembrane domain (TM) and short cytoplasmic domain, (semaphorin) 4C
SEMG2	semenogelin II
SERF2	small EDRK-rich factor 2
SERPINA1	serpin peptidase inhibitor, clade A (alpha-1 antiproteinase, antitrypsin), member 1
SERPINA3	serpin peptidase inhibitor, clade A (alpha-1 antiproteinase, antitrypsin), member 3
SERPINA4	serpin peptidase inhibitor, clade A (alpha-1 antiproteinase, antitrypsin), member 4
SERPINB1	serpin peptidase inhibitor, clade B (ovalbumin), member 1
SERPINB3	serpin peptidase inhibitor, clade B (ovalbumin), member 3
SERPINB6	serpin peptidase inhibitor, clade B (ovalbumin), member 6
SERPINB8	serpin peptidase inhibitor, clade B (ovalbumin), member 8
SERPINC1	serpin peptidase inhibitor, clade C (antithrombin), member 1
SERPIND1	serpin peptidase inhibitor, clade D (heparin cofactor), member 1
SERPINE2	serpin peptidase inhibitor, clade E (nexin, plasminogen activator inhibitor type 1), member 2
SERPINF2	serpin peptidase inhibitor, clade F (alpha-2 antiplasmin, pigment epithelium derived factor), member 2
SFRP2	secreted frizzled-related protein 2
SH3BGRL2	SH3 domain binding glutamic acid-rich protein like 2
SH3YL1	SH3 domain containing, Ysc84-like 1 (S. cerevisiae)
SHANK1	SH3 and multiple ankyrin repeat domains 1
SIGLEC1	sialic acid binding Ig-like lectin 1, sialoadhesin
SIPA1L1	signal-induced proliferation-associated 1 like 1
SLC6A12	solute carrier family 6 (neurotransmitter transporter, betaine/GABA), member 12
SLC9A3	solute carrier family 9 (sodium/hydrogen exchanger), member 3
SLC9A8	solute carrier family 9 (sodium/hydrogen exchanger), member 8
SLPI	secretory leukocyte peptidase inhibitor
SMPDL3A	sphingomyelin phosphodiesterase, acid-like 3A
SNCB	synuclein, beta
SNCG	synuclein, gamma (breast cancer-specific protein 1)
SNTB2	syntrophin, beta 2 (dystrophin-associated protein A1, 59kDa, basic component 2)
SNX13	sorting nexin 13
SORCS1	sortilin-related VPS10 domain containing receptor 1
SOSTDC1	sclerostin domain containing 1
SPERT	spermatid associated
SPINT1	serine peptidase inhibitor, Kunitz type 1
SPINT2	serine peptidase inhibitor, Kunitz type, 2
SPOCK3	sparc/osteonectin, cwcv and kazal-like domains proteoglycan (testican) 3
SPP1	secreted phosphoprotein 1 (osteopontin, bone sialoprotein I, early T-lymphocyte activation 1)
STAR	steroidogenic acute regulator
STX4	syntaxin 4
SUSD2	sushi domain containing 2
SYNE2	spectrin repeat containing, nuclear envelope 2
TANC1	tetratricopeptide repeat, ankyrin repeat and coiled-coil containing 1
TBC1D3E	TBC1 domain family, member 3E
TBC1D3I	TBC1 domain family, member 3I
TDRD7	tudor domain containing 7
TENC1	tensin like C1 domain containing phosphatase (tensin 2)
TF	transferrin
TFPI2	tissue factor pathway inhibitor 2
TG	thyroglobulin
TGM4	transglutaminase 4 (prostate)
THBS2	thrombospondin 2
TIAM1	T-cell lymphoma invasion and metastasis 1
TIMP3	TIMP metallopeptidase inhibitor 3 (Sorsby fundus dystrophy, pseudoinflammatory)
TIMP4	TIMP metallopeptidase inhibitor 4
TJAP1	tight junction associated protein 1 (peripheral)
TJP3	tight junction protein 3 (zona occludens 3)
TNC	tenascin C (hexabrachion)
TNS3	tensin 3
TPBG	trophoblast glycoprotein
TRAC	T cell receptor alpha constant
TRY6	-
TSPAN3	tetraspanin 3
TTR	transthyretin (prealbumin, amyloidosis type I)
TXNDC2	thioredoxin domain containing 2 (spermatozoa)
TYRP1	tyrosinase-related protein 1
UBE2L6	ubiquitin-conjugating enzyme E2L 6
UCN3	urocortin 3 (stresscopin)
VAMP1	vesicle-associated membrane protein 1 (synaptobrevin 1)
VAMP2	vesicle-associated membrane protein 2 (synaptobrevin 2)
VANGL1	vang-like 1 (van gogh, Drosophila)
VASN	vasorin
VCAM1	vascular cell adhesion molecule 1
VPREB1	pre-B lymphocyte gene 1
VPS24	vacuolar protein sorting 24 homolog (S. cerevisiae)
VWA1	von Willebrand factor A domain containing 1
WNT2	wingless-type MMTV integration site family member 2
WNT3A	wingless-type MMTV integration site family, member 3A
WNT7B	wingless-type MMTV integration site family, member 7B
ZBED1	zinc finger, BED-type containing 1
ZBTB25	zinc finger and BTB domain containing 25
ZC3H7A	zinc finger CCCH-type containing 7A
ZMYND19	zinc finger, MYND-type containing 19
ZNF232	zinc finger protein 232
ZNF250	zinc finger protein 250
ZNF292	zinc finger protein 292
ZP3	zona pellucida glycoprotein 3 (sperm receptor)
ZP4	zona pellucida glycoprotein 4

## Sheet: Fourth_Module_GSEA
Overlap Results
Collection(s):	BP
# overlaps shown:	10
# genesets in collections:	825
# genes in comparison (n):	1186
# genes in collections (N):	6032
Gene Set Name	# Genes in Gene Set (K)	Description	# Genes in Overlap (k)	k/K	p value
INDUCTION_OF_APOPTOSIS_BY_EXTRACELLULAR_SIGNALS	27	Genes annotated by the GO term GO:0008624. Any process induced by extracellular signals that directly activates any of the steps required for cell death by apoptosis.	12	0.4444	0.00291
TRANSLATION	177	Genes annotated by the GO term GO:0006412. The chemical reactions and pathways resulting in the formation of a protein. This is a ribosome-mediated process in which the information in messenger RNA (mRNA) is used to specify the sequence of amino acids in the protein.	50	0.2825	0.0033
I_KAPPAB_KINASE_NF_KAPPAB_CASCADE	107	Genes annotated by the GO term GO:0007249. A series of reactions initiated by the activation of the transcription factor NF-kappaB. NF-kappaB is sequestered by the inhibitor I-kappaB, and is released when I-kappaB is phosphorylated by activated I-kappaB kinase.	32	0.2991	0.00693
APOPTOTIC_PROGRAM	60	Genes annotated by the GO term GO:0008632. The intracellular signaling cascade that results when a cell is triggered to undergo apoptosis.	19	0.3167	0.0181
ACTIN_FILAMENT_BASED_MOVEMENT	10	Genes annotated by the GO term GO:0030048. Movement of organelles or other particles along actin filaments, or sliding of actin filaments past each other, mediated by motor proteins.	5	0.5	0.0305
PROTEIN_FOLDING	56	Genes annotated by the GO term GO:0006457. The process of assisting in the covalent and noncovalent assembly of single chain polypeptides or multisubunit complexes into the correct tertiary structure.	17	0.3036	0.0367
RNA_SPLICING	82	Genes annotated by the GO term GO:0008380. The process of removing sections of the primary RNA transcript to remove sequences not present in the mature form of the RNA and joining the remaining sections to form the mature form of the RNA.	23	0.2805	0.0414
EPIDERMIS_DEVELOPMENT	70	Genes annotated by the GO term GO:0008544. The process whose specific outcome is the progression of the epidermis over time, from its formation to the mature structure. The epidermis is the outer epithelial layer of a plant or animal, it may be a single layer that produces an extracellular material (e.g. the cuticle of arthropods) or a complex stratified squamous epithelium, as in the case of man…	20	0.2857	0.0458
ECTODERM_DEVELOPMENT	79	Genes annotated by the GO term GO:0007398. The process whose specific outcome is the progression of the ectoderm over time, from its formation to the mature structure. In animal embryos, the ectoderm is the outer germ layer of the embryo, formed during gastrulation.	22	0.2785	0.0488
NOTCH_SIGNALING_PATHWAY	12	Genes annotated by the GO term GO:0007219. The series of molecular signals initiated by binding of an extracellular ligand to a Notch receptor on the surface of the target cell.	5	0.4167	0.068
Gene/Gene Set Overlap Matrix
Gene Symbol	Description	INDUCTION_OF_APOPTOSIS_BY_EXTRACELLULAR_SIGNALS	TRANSLATION	I_KAPPAB_KINASE_NF_KAPPAB_CASCADE	APOPTOTIC_PROGRAM	ACTIN_FILAMENT_BASED_MOVEMENT	PROTEIN_FOLDING	RNA_SPLICING	EPIDERMIS_DEVELOPMENT	ECTODERM_DEVELOPMENT	NOTCH_SIGNALING_PATHWAY
CFLAR	CASP8 and FADD-like apoptosis regulator	INDUCTION_OF_APOPTOSIS_BY_EXTRACELLULAR_SIGNALS		I_KAPPAB_KINASE_NF_KAPPAB_CASCADE
FADD	Fas (TNFRSF6)-associated via death domain	INDUCTION_OF_APOPTOSIS_BY_EXTRACELLULAR_SIGNALS		I_KAPPAB_KINASE_NF_KAPPAB_CASCADE
CASP8AP2	CASP8 associated protein 2	INDUCTION_OF_APOPTOSIS_BY_EXTRACELLULAR_SIGNALS			APOPTOTIC_PROGRAM
DIABLO	diablo homolog (Drosophila)	INDUCTION_OF_APOPTOSIS_BY_EXTRACELLULAR_SIGNALS			APOPTOTIC_PROGRAM
DEDD2	death effector domain containing 2	INDUCTION_OF_APOPTOSIS_BY_EXTRACELLULAR_SIGNALS			APOPTOTIC_PROGRAM
DAPK1	death-associated protein kinase 1	INDUCTION_OF_APOPTOSIS_BY_EXTRACELLULAR_SIGNALS
DEDD	death effector domain containing	INDUCTION_OF_APOPTOSIS_BY_EXTRACELLULAR_SIGNALS
PDCD6	programmed cell death 6	INDUCTION_OF_APOPTOSIS_BY_EXTRACELLULAR_SIGNALS
RIPK3	receptor-interacting serine-threonine kinase 3	INDUCTION_OF_APOPTOSIS_BY_EXTRACELLULAR_SIGNALS
TNFRSF25	tumor necrosis factor receptor superfamily, member 25	INDUCTION_OF_APOPTOSIS_BY_EXTRACELLULAR_SIGNALS
CRADD	CASP2 and RIPK1 domain containing adaptor with death domain	INDUCTION_OF_APOPTOSIS_BY_EXTRACELLULAR_SIGNALS
DAP3	death associated protein 3	INDUCTION_OF_APOPTOSIS_BY_EXTRACELLULAR_SIGNALS
PAIP1	poly(A) binding protein interacting protein 1		TRANSLATION
HSPB1	heat shock 27kDa protein 1		TRANSLATION
RPS3A	ribosomal protein S3A		TRANSLATION
EIF4G2	eukaryotic translation initiation factor 4 gamma, 2		TRANSLATION
EIF4A2	eukaryotic translation initiation factor 4A, isoform 2		TRANSLATION
EIF4G3	eukaryotic translation initiation factor 4 gamma, 3		TRANSLATION
AARS	alanyl-tRNA synthetase		TRANSLATION
PABPC4	poly(A) binding protein, cytoplasmic 4 (inducible form)		TRANSLATION
TNIP1	TNFAIP3 interacting protein 1		TRANSLATION
RPS19	ribosomal protein S19		TRANSLATION
EEF1A1	eukaryotic translation elongation factor 1 alpha 1		TRANSLATION
TUFM	Tu translation elongation factor, mitochondrial		TRANSLATION
APBB1	amyloid beta (A4) precursor protein-binding, family B, member 1 (Fe65)		TRANSLATION
RARS	arginyl-tRNA synthetase		TRANSLATION
KRT7	keratin 7		TRANSLATION
RPL11	ribosomal protein L11		TRANSLATION
LTB	lymphotoxin beta (TNF superfamily, member 3)		TRANSLATION
SAMD4A	sterile alpha motif domain containing 4A		TRANSLATION
IGF2BP2	insulin-like growth factor 2 mRNA binding protein 2		TRANSLATION
RPL6	ribosomal protein L6		TRANSLATION
RPS27	ribosomal protein S27 (metallopanstimulin 1)		TRANSLATION
RPL14	ribosomal protein L14		TRANSLATION
RPL15	ribosomal protein L15		TRANSLATION
RPL18	ribosomal protein L18		TRANSLATION
RPL18A	ribosomal protein L18a		TRANSLATION
RPL19	ribosomal protein L19		TRANSLATION
RPL21	ribosomal protein L21		TRANSLATION
RPL22	ribosomal protein L22		TRANSLATION
RPL23A	ribosomal protein L23a		TRANSLATION
RPL24	ribosomal protein L24		TRANSLATION
RPL26	ribosomal protein L26		TRANSLATION
RPL27A	ribosomal protein L27a		TRANSLATION
RPL28	ribosomal protein L28		TRANSLATION
RPL3	ribosomal protein L3		TRANSLATION
RPL30	ribosomal protein L30		TRANSLATION
RPL31	ribosomal protein L31		TRANSLATION
RPL35	ribosomal protein L35		TRANSLATION
RPL4	ribosomal protein L4		TRANSLATION
RPL5	ribosomal protein L5		TRANSLATION
RPL7	ribosomal protein L7		TRANSLATION
RPL7A	ribosomal protein L7a		TRANSLATION
RPL8	ribosomal protein L8		TRANSLATION
RPS10	ribosomal protein S10		TRANSLATION
RPS11	ribosomal protein S11		TRANSLATION
RPS12	ribosomal protein S12		TRANSLATION
RPS17	ribosomal protein S17		TRANSLATION
RPS2	ribosomal protein S2		TRANSLATION
RPS3	ribosomal protein S3		TRANSLATION
RPS5	ribosomal protein S5		TRANSLATION
RPS9	ribosomal protein S9		TRANSLATION
CASP8	caspase 8, apoptosis-related cysteine peptidase			I_KAPPAB_KINASE_NF_KAPPAB_CASCADE	APOPTOTIC_PROGRAM
STAT1	signal transducer and activator of transcription 1, 91kDa			I_KAPPAB_KINASE_NF_KAPPAB_CASCADE	APOPTOTIC_PROGRAM
RELA	v-rel reticuloendotheliosis viral oncogene homolog A, nuclear factor of kappa light polypeptide gene enhancer in B-cells 3, p65 (avian)			I_KAPPAB_KINASE_NF_KAPPAB_CASCADE
FLNA	filamin A, alpha (actin binding protein 280)			I_KAPPAB_KINASE_NF_KAPPAB_CASCADE
TRADD	TNFRSF1A-associated via death domain			I_KAPPAB_KINASE_NF_KAPPAB_CASCADE
RIPK1	receptor (TNFRSF)-interacting serine-threonine kinase 1			I_KAPPAB_KINASE_NF_KAPPAB_CASCADE
TNFRSF1A	tumor necrosis factor receptor superfamily, member 1A			I_KAPPAB_KINASE_NF_KAPPAB_CASCADE
CD40	CD40 molecule, TNF receptor superfamily member 5			I_KAPPAB_KINASE_NF_KAPPAB_CASCADE
CASP1	caspase 1, apoptosis-related cysteine peptidase (interleukin 1, beta, convertase)			I_KAPPAB_KINASE_NF_KAPPAB_CASCADE
BIRC2	baculoviral IAP repeat-containing 2			I_KAPPAB_KINASE_NF_KAPPAB_CASCADE
TNFRSF10B	tumor necrosis factor receptor superfamily, member 10b			I_KAPPAB_KINASE_NF_KAPPAB_CASCADE
LTBR	lymphotoxin beta receptor (TNFR superfamily, member 3)			I_KAPPAB_KINASE_NF_KAPPAB_CASCADE
PPM1A	protein phosphatase 1A (formerly 2C), magnesium-dependent, alpha isoform			I_KAPPAB_KINASE_NF_KAPPAB_CASCADE
REL	v-rel reticuloendotheliosis viral oncogene homolog (avian)			I_KAPPAB_KINASE_NF_KAPPAB_CASCADE
RPL17	ribosomal protein L17			I_KAPPAB_KINASE_NF_KAPPAB_CASCADE
TFG	TRK-fused gene			I_KAPPAB_KINASE_NF_KAPPAB_CASCADE
TICAM1	toll-like receptor adaptor molecule 1			I_KAPPAB_KINASE_NF_KAPPAB_CASCADE
TRAF3IP2	TRAF3 interacting protein 2			I_KAPPAB_KINASE_NF_KAPPAB_CASCADE
TRAF5	TNF receptor-associated factor 5			I_KAPPAB_KINASE_NF_KAPPAB_CASCADE
TRIM38	tripartite motif-containing 38			I_KAPPAB_KINASE_NF_KAPPAB_CASCADE
TNFAIP3	tumor necrosis factor, alpha-induced protein 3			I_KAPPAB_KINASE_NF_KAPPAB_CASCADE
ERC1	ELKS/RAB6-interacting/CAST family member 1			I_KAPPAB_KINASE_NF_KAPPAB_CASCADE
TIAF1	TGFB1-induced anti-apoptotic factor 1			I_KAPPAB_KINASE_NF_KAPPAB_CASCADE
TNFSF14	tumor necrosis factor (ligand) superfamily, member 14			I_KAPPAB_KINASE_NF_KAPPAB_CASCADE
TRAF2	TNF receptor-associated factor 2			I_KAPPAB_KINASE_NF_KAPPAB_CASCADE
IRAK2	interleukin-1 receptor-associated kinase 2			I_KAPPAB_KINASE_NF_KAPPAB_CASCADE
CHUK	conserved helix-loop-helix ubiquitous kinase			I_KAPPAB_KINASE_NF_KAPPAB_CASCADE
PRDX4	peroxiredoxin 4			I_KAPPAB_KINASE_NF_KAPPAB_CASCADE
EDARADD	EDAR-associated death domain			I_KAPPAB_KINASE_NF_KAPPAB_CASCADE
IRAK1BP1	interleukin-1 receptor-associated kinase 1 binding protein 1			I_KAPPAB_KINASE_NF_KAPPAB_CASCADE
PSEN2	presenilin 2 (Alzheimer disease 4)				APOPTOTIC_PROGRAM						NOTCH_SIGNALING_PATHWAY
VCP	valosin-containing protein				APOPTOTIC_PROGRAM
MTCH1	mitochondrial carrier homolog 1 (C. elegans)				APOPTOTIC_PROGRAM
HIP1	huntingtin interacting protein 1				APOPTOTIC_PROGRAM
APAF1	apoptotic peptidase activating factor				APOPTOTIC_PROGRAM
IFT57	intraflagellar transport 57 homolog (Chlamydomonas)				APOPTOTIC_PROGRAM
SOD1	superoxide dismutase 1, soluble (amyotrophic lateral sclerosis 1 (adult))				APOPTOTIC_PROGRAM
TPD52L1	tumor protein D52-like 1				APOPTOTIC_PROGRAM
DFFA	DNA fragmentation factor, 45kDa, alpha polypeptide				APOPTOTIC_PROGRAM
CASP3	caspase 3, apoptosis-related cysteine peptidase				APOPTOTIC_PROGRAM
GZMB	granzyme B (granzyme 2, cytotoxic T-lymphocyte-associated serine esterase 1)				APOPTOTIC_PROGRAM
VDAC1	voltage-dependent anion channel 1				APOPTOTIC_PROGRAM
CASP2	caspase 2, apoptosis-related cysteine peptidase (neural precursor cell expressed, developmentally down-regulated 2)				APOPTOTIC_PROGRAM
CASP7	caspase 7, apoptosis-related cysteine peptidase				APOPTOTIC_PROGRAM
MYH9	myosin, heavy chain 9, non-muscle					ACTIN_FILAMENT_BASED_MOVEMENT
MYL6	myosin, light chain 6, alkali, smooth muscle and non-muscle					ACTIN_FILAMENT_BASED_MOVEMENT
MYH10	myosin, heavy chain 10, non-muscle					ACTIN_FILAMENT_BASED_MOVEMENT
MYO6	myosin VI					ACTIN_FILAMENT_BASED_MOVEMENT
MYO9B	myosin IXB					ACTIN_FILAMENT_BASED_MOVEMENT
PPIA	peptidylprolyl isomerase A (cyclophilin A)						PROTEIN_FOLDING
BAG4	BCL2-associated athanogene 4						PROTEIN_FOLDING
HSP90AA1	heat shock protein 90kDa alpha (cytosolic), class A member 1						PROTEIN_FOLDING
PIGK	phosphatidylinositol glycan anchor biosynthesis, class K						PROTEIN_FOLDING
PDIA5	protein disulfide isomerase family A, member 5						PROTEIN_FOLDING
CCT6B	chaperonin containing TCP1, subunit 6B (zeta 2)						PROTEIN_FOLDING
RUVBL2	RuvB-like 2 (E. coli)						PROTEIN_FOLDING
DNAJA1	DnaJ (Hsp40) homolog, subfamily A, member 1						PROTEIN_FOLDING
AHSA1	AHA1, activator of heat shock 90kDa protein ATPase homolog 1 (yeast)						PROTEIN_FOLDING
ARL2	ADP-ribosylation factor-like 2						PROTEIN_FOLDING
BAG2	BCL2-associated athanogene 2						PROTEIN_FOLDING
CCT3	chaperonin containing TCP1, subunit 3 (gamma)						PROTEIN_FOLDING
CCT4	chaperonin containing TCP1, subunit 4 (delta)						PROTEIN_FOLDING
CCT6A	chaperonin containing TCP1, subunit 6A (zeta 1)						PROTEIN_FOLDING
CCT7	chaperonin containing TCP1, subunit 7 (eta)						PROTEIN_FOLDING
TBCC	tubulin-specific chaperone c						PROTEIN_FOLDING
TBCE	tubulin-specific chaperone e						PROTEIN_FOLDING
SFRS1	splicing factor, arginine/serine-rich 1 (splicing factor 2, alternate splicing factor)							RNA_SPLICING
SFRS6	splicing factor, arginine/serine-rich 6							RNA_SPLICING
SRPK2	SFRS protein kinase 2							RNA_SPLICING
CRNKL1	Crn, crooked neck-like 1 (Drosophila)							RNA_SPLICING
SNRPD1	small nuclear ribonucleoprotein D1 polypeptide 16kDa							RNA_SPLICING
SNRPD2	small nuclear ribonucleoprotein D2 polypeptide 16.5kDa							RNA_SPLICING
GEMIN5	gem (nuclear organelle) associated protein 5							RNA_SPLICING
BAT1	HLA-B associated transcript 1							RNA_SPLICING
TRA2A	-							RNA_SPLICING
NCBP1	nuclear cap binding protein subunit 1, 80kDa							RNA_SPLICING
SF3B3	splicing factor 3b, subunit 3, 130kDa							RNA_SPLICING
EFTUD2	elongation factor Tu GTP binding domain containing 2							RNA_SPLICING
NONO	non-POU domain containing, octamer-binding							RNA_SPLICING
PTBP1	polypyrimidine tract binding protein 1							RNA_SPLICING
SFPQ	splicing factor proline/glutamine-rich (polypyrimidine tract binding protein associated)							RNA_SPLICING
SFRS11	splicing factor, arginine/serine-rich 11							RNA_SPLICING
NOL3	nucleolar protein 3 (apoptosis repressor with CARD domain)							RNA_SPLICING
NCBP2	nuclear cap binding protein subunit 2, 20kDa							RNA_SPLICING
PRPF4B	PRP4 pre-mRNA processing factor 4 homolog B (yeast)							RNA_SPLICING
SF3B2	splicing factor 3b, subunit 2, 145kDa							RNA_SPLICING
SNRPA1	small nuclear ribonucleoprotein polypeptide A'							RNA_SPLICING
SNRPB	small nuclear ribonucleoprotein polypeptides B and B1							RNA_SPLICING
ZRANB2	zinc finger, RAN-binding domain containing 2							RNA_SPLICING
NME2	non-metastatic cells 2, protein (NM23B) expressed in								EPIDERMIS_DEVELOPMENT	ECTODERM_DEVELOPMENT
DSP	desmoplakin								EPIDERMIS_DEVELOPMENT	ECTODERM_DEVELOPMENT
EVPL	envoplakin								EPIDERMIS_DEVELOPMENT	ECTODERM_DEVELOPMENT
SPRR1A	small proline-rich protein 1A								EPIDERMIS_DEVELOPMENT	ECTODERM_DEVELOPMENT
ALDH3A2	aldehyde dehydrogenase 3 family, member A2								EPIDERMIS_DEVELOPMENT	ECTODERM_DEVELOPMENT
S100A7	S100 calcium binding protein A7								EPIDERMIS_DEVELOPMENT	ECTODERM_DEVELOPMENT
SPINK5	serine peptidase inhibitor, Kazal type 5								EPIDERMIS_DEVELOPMENT	ECTODERM_DEVELOPMENT
KRT2	keratin 2 (epidermal ichthyosis bullosa of Siemens)								EPIDERMIS_DEVELOPMENT	ECTODERM_DEVELOPMENT
KRT9	keratin 9 (epidermolytic palmoplantar keratoderma)								EPIDERMIS_DEVELOPMENT	ECTODERM_DEVELOPMENT
PTCH2	patched homolog 2 (Drosophila)								EPIDERMIS_DEVELOPMENT	ECTODERM_DEVELOPMENT
ALOX12B	arachidonate 12-lipoxygenase, 12R type								EPIDERMIS_DEVELOPMENT	ECTODERM_DEVELOPMENT
KRT16	keratin 16 (focal non-epidermolytic palmoplantar keratoderma)								EPIDERMIS_DEVELOPMENT	ECTODERM_DEVELOPMENT
CASP14	caspase 14, apoptosis-related cysteine peptidase								EPIDERMIS_DEVELOPMENT	ECTODERM_DEVELOPMENT
FLOT2	flotillin 2								EPIDERMIS_DEVELOPMENT	ECTODERM_DEVELOPMENT
KRT10	keratin 10 (epidermolytic hyperkeratosis; keratosis palmaris et plantaris)								EPIDERMIS_DEVELOPMENT	ECTODERM_DEVELOPMENT
KRT14	keratin 14 (epidermolysis bullosa simplex, Dowling-Meara, Koebner)								EPIDERMIS_DEVELOPMENT	ECTODERM_DEVELOPMENT
KRT31	keratin 31								EPIDERMIS_DEVELOPMENT	ECTODERM_DEVELOPMENT
KRT32	keratin 32								EPIDERMIS_DEVELOPMENT	ECTODERM_DEVELOPMENT
KRT5	keratin 5 (epidermolysis bullosa simplex, Dowling-Meara/Kobner/Weber-Cockayne types)								EPIDERMIS_DEVELOPMENT	ECTODERM_DEVELOPMENT
KRT85	keratin 85								EPIDERMIS_DEVELOPMENT	ECTODERM_DEVELOPMENT
TFAP2A	transcription factor AP-2 alpha (activating enhancer binding protein 2 alpha)									ECTODERM_DEVELOPMENT
KRT6B	keratin 6B									ECTODERM_DEVELOPMENT
PSEN1	presenilin 1 (Alzheimer disease 3)										NOTCH_SIGNALING_PATHWAY
NCSTN	nicastrin										NOTCH_SIGNALING_PATHWAY
PSENEN	presenilin enhancer 2 homolog (C. elegans)										NOTCH_SIGNALING_PATHWAY
NOTCH1	Notch homolog 1, translocation-associated (Drosophila)										NOTCH_SIGNALING_PATHWAY
PABPC1	poly(A) binding protein, cytoplasmic 1
DHX15	DEAH (Asp-Glu-Ala-His) box polypeptide 15
LIMA1	LIM domain and actin binding 1
TMSB4Y	thymosin, beta 4, Y-linked
GSN	gelsolin (amyloidosis, Finnish type)
ARHGEF2	rho/rac guanine nucleotide exchange factor (GEF) 2
APBA1	amyloid beta (A4) precursor protein-binding, family A, member 1 (X11)
NEFL	neurofilament, light polypeptide 68kDa
LRPPRC	leucine-rich PPR-motif containing
NPM1	nucleophosmin (nucleolar phosphoprotein B23, numatrin)
RPS14	ribosomal protein S14
NOLC1	nucleolar and coiled-body phosphoprotein 1
DKC1	dyskeratosis congenita 1, dyskerin
FBL	fibrillarin
TNF	tumor necrosis factor (TNF superfamily, member 2)
IKBKB	inhibitor of kappa light polypeptide gene enhancer in B-cells, kinase beta
PRDX3	peroxiredoxin 3
ACADVL	acyl-Coenzyme A dehydrogenase, very long chain
ECH1	enoyl Coenzyme A hydratase 1, peroxisomal
ACADM	acyl-Coenzyme A dehydrogenase, C-4 to C-12 straight chain
HADHB	hydroxyacyl-Coenzyme A dehydrogenase/3-ketoacyl-Coenzyme A thiolase/enoyl-Coenzyme A hydratase (trifunctional protein), beta subunit
ACO2	aconitase 2, mitochondrial
ACLY	ATP citrate lyase
IDH1	isocitrate dehydrogenase 1 (NADP+), soluble
IDH3B	isocitrate dehydrogenase 3 (NAD+) beta
ANXA1	annexin A1
CDC42	cell division cycle 42 (GTP binding protein, 25kDa)
TAOK2	TAO kinase 2
FGD4	FYVE, RhoGEF and PH domain containing 4
ACTA1	actin, alpha 1, skeletal muscle
KRT19	keratin 19
CFL1	cofilin 1 (non-muscle)
SCIN	scinderin
FSCN1	fascin homolog 1, actin-bundling protein (Strongylocentrotus purpuratus)
DBN1	drebrin 1
DYNLL1	dynein, light chain, LC8-type 1
RICTOR	-
ROCK1	Rho-associated, coiled-coil containing protein kinase 1
FLNB	filamin B, beta (actin binding protein 278)
ARPC1A	actin related protein 2/3 complex, subunit 1A, 41kDa
ARPC4	actin related protein 2/3 complex, subunit 4, 20kDa
ARPC5	actin related protein 2/3 complex, subunit 5, 16kDa
ALOX12	arachidonate 12-lipoxygenase
YWHAH	tyrosine 3-monooxygenase/tryptophan 5-monooxygenase activation protein, eta polypeptide
TERF2	telomeric repeat binding factor 2
NNT	nicotinamide nucleotide transhydrogenase
SDHA	succinate dehydrogenase complex, subunit A, flavoprotein (Fp)
RSF1	remodeling and spacing factor 1
SMARCA5	SWI/SNF related, matrix associated, actin dependent regulator of chromatin, subfamily a, member 5
NAP1L1	nucleosome assembly protein 1-like 1
CNTN4	contactin 4
YWHAG	tyrosine 3-monooxygenase/tryptophan 5-monooxygenase activation protein, gamma polypeptide
NDUFS1	NADH dehydrogenase (ubiquinone) Fe-S protein 1, 75kDa (NADH-coenzyme Q reductase)
CTPS	CTP synthase
UMPS	uridine monophosphate synthetase (orotate phosphoribosyl transferase and orotidine-5'-decarboxylase)
IGF2BP3	insulin-like growth factor 2 mRNA binding protein 3
DDX17	DEAD (Asp-Glu-Ala-Asp) box polypeptide 17
KPNB1	karyopherin (importin) beta 1
TNPO1	transportin 1
MPST	mercaptopyruvate sulfurtransferase
PRMT5	protein arginine methyltransferase 5
TST	thiosulfate sulfurtransferase (rhodanese)
DMAP1	DNA methyltransferase 1 associated protein 1
PRMT1	protein arginine methyltransferase 1
PCMT1	protein-L-isoaspartate (D-aspartate) O-methyltransferase
MYF6	myogenic factor 6 (herculin)
CSRP3	cysteine and glycine-rich protein 3 (cardiac LIM protein)
SVIL	supervillin
COPB1	coatomer protein complex, subunit beta 1
COPB2	coatomer protein complex, subunit beta 2 (beta prime)
COPE	coatomer protein complex, subunit epsilon
KPNA3	karyopherin alpha 3 (importin alpha 4)
KPNA5	karyopherin alpha 5 (importin alpha 6)
GSTM3	glutathione S-transferase M3 (brain)
PRDX2	peroxiredoxin 2
CRYAB	crystallin, alpha B
NFKB1	nuclear factor of kappa light polypeptide gene enhancer in B-cells 1 (p105)
GSTP1	glutathione S-transferase pi
BIRC3	baculoviral IAP repeat-containing 3
ANXA5	annexin A5
TNFRSF18	tumor necrosis factor receptor superfamily, member 18
YWHAZ	tyrosine 3-monooxygenase/tryptophan 5-monooxygenase activation protein, zeta polypeptide
BFAR	bifunctional apoptosis regulator
SON	SON DNA binding protein
ERN1	endoplasmic reticulum to nucleus signalling 1
KRT18	keratin 18
PPP2R1A	protein phosphatase 2 (formerly 2A), regulatory subunit A (PR 65), alpha isoform
PPP2CA	protein phosphatase 2 (formerly 2A), catalytic subunit, alpha isoform
MAP3K10	mitogen-activated protein kinase kinase kinase 10
CUL5	cullin 5
DAPK3	death-associated protein kinase 3
CASP4	caspase 4, apoptosis-related cysteine peptidase
CASP6	caspase 6, apoptosis-related cysteine peptidase
BCLAF1	BCL2-associated transcription factor 1
TNFRSF9	tumor necrosis factor receptor superfamily, member 9
LTA	lymphotoxin alpha (TNF superfamily, member 1)
TRAF3	TNF receptor-associated factor 3
CASP10	caspase 10, apoptosis-related cysteine peptidase
TIA1	TIA1 cytotoxic granule-associated RNA binding protein
PHB	prohibitin
HSPD1	heat shock 60kDa protein 1 (chaperonin)
FIS1	fission 1 (mitochondrial outer membrane) homolog (S. cerevisiae)
UBE4B	ubiquitination factor E4B (UFD2 homolog, yeast)
TXNL1	thioredoxin-like 1
PAWR	PRKC, apoptosis, WT1, regulator
CYFIP2	cytoplasmic FMR1 interacting protein 2
NCKAP1	NCK-associated protein 1
TNFSF9	tumor necrosis factor (ligand) superfamily, member 9
FXR1	fragile X mental retardation, autosomal homolog 1
GAS2	growth arrest-specific 2
NFKBIA	nuclear factor of kappa light polypeptide gene enhancer in B-cells inhibitor, alpha
PDCD2	programmed cell death 2
XRCC4	X-ray repair complementing defective repair in Chinese hamster cells 4
RAD21	RAD21 homolog (S. pombe)
XRCC6	X-ray repair complementing defective repair in Chinese hamster cells 6 (Ku autoantigen, 70kDa)
CDK6	cyclin-dependent kinase 6
TGM2	transglutaminase 2 (C polypeptide, protein-glutamine-gamma-glutamyltransferase)
CLN5	ceroid-lipofuscinosis, neuronal 5
CLCN3	chloride channel 3
ATP6V1B1	ATPase, H+ transporting, lysosomal 56/58kDa, V1 subunit B1 (Renal tubular acidosis with deafness)
TSSK6	testis-specific serine kinase 6
MYBPC3	myosin binding protein C, cardiac
TPM1	tropomyosin 1 (alpha)
MYL9	myosin, light chain 9, regulatory
PRDX6	peroxiredoxin 6
PNKP	polynucleotide kinase 3'-phosphatase
APTX	aprataxin
STK25	serine/threonine kinase 25 (STE20 homolog, yeast)
NDUFB4	NADH dehydrogenase (ubiquinone) 1 beta subcomplex, 4, 15kDa
PRNP	prion protein (p27-30) (Creutzfeldt-Jakob disease, Gerstmann-Strausler-Scheinker syndrome, fatal familial insomnia)
DTNA	dystrobrevin, alpha
MYOM1	myomesin 1 (skelemin) 185kDa
EYA2	eyes absent homolog 2 (Drosophila)
COMMD7	COMM domain containing 7
TTK	TTK protein kinase
RAN	RAN, member RAS oncogene family
CCS	copper chaperone for superoxide dismutase
C5AR1	complement component 5a receptor 1
NFKBIE	nuclear factor of kappa light polypeptide gene enhancer in B-cells inhibitor, epsilon
MAFB	v-maf musculoaponeurotic fibrosarcoma oncogene homolog B (avian)
CLIC5	chloride intracellular channel 5
SLC34A1	solute carrier family 34 (sodium phosphate), member 1
CLIC1	chloride intracellular channel 1
SLC26A3	solute carrier family 26, member 3
VDAC2	voltage-dependent anion channel 2
ACTN1	actinin, alpha 1
PARP1	poly (ADP-ribose) polymerase family, member 1
SIRT6	sirtuin (silent mating type information regulation 2 homolog) 6 (S. cerevisiae)
NQO1	NAD(P)H dehydrogenase, quinone 1
HSPA2	heat shock 70kDa protein 2
TCF21	transcription factor 21
DMD	dystrophin (muscular dystrophy, Duchenne and Becker types)
KIF2C	kinesin family member 2C
MARK4	MAP/microtubule affinity-regulating kinase 4
MID1	midline 1 (Opitz/BBB syndrome)
TMED10	transmembrane emp24-like trafficking protein 10 (yeast)
KRT20	keratin 20
TIMM50	translocase of inner mitochondrial membrane 50 homolog (S. cerevisiae)
TIMM44	translocase of inner mitochondrial membrane 44 homolog (yeast)
SLC25A1	solute carrier family 25 (mitochondrial carrier; citrate transporter), member 1
SLC25A4	solute carrier family 25 (mitochondrial carrier; adenine nucleotide translocator), member 4
NDUFS7	NADH dehydrogenase (ubiquinone) Fe-S protein 7, 20kDa (NADH-coenzyme Q reductase)
MRPL12	mitochondrial ribosomal protein L12
POLRMT	polymerase (RNA) mitochondrial (DNA directed)
CSDA	cold shock domain protein A
CIRBP	cold inducible RNA binding protein
SYNE1	spectrin repeat containing, nuclear envelope 1
UGDH	UDP-glucose dehydrogenase
FECH	ferrochelatase (protoporphyria)
AP3D1	adaptor-related protein complex 3, delta 1 subunit
IL18	interleukin 18 (interferon-gamma-inducing factor)
MYO7A	myosin VIIA
IQCB1	IQ motif containing B1
PARN	poly(A)-specific ribonuclease (deadenylation nuclease)
USP9X	ubiquitin specific peptidase 9, X-linked
SMTN	smoothelin
PPP6C	protein phosphatase 6, catalytic subunit
PTPRD	protein tyrosine phosphatase, receptor type, D
PPEF1	protein phosphatase, EF-hand calcium binding domain 1
PPEF2	protein phosphatase, EF-hand calcium binding domain 2
PPM1B	protein phosphatase 1B (formerly 2C), magnesium-dependent, beta isoform
PPP2CB	protein phosphatase 2 (formerly 2A), catalytic subunit, beta isoform
PPP2R2A	protein phosphatase 2 (formerly 2A), regulatory subunit B (PR 52), alpha isoform
PTPRO	protein tyrosine phosphatase, receptor type, O
KIAA1804	-
APH1B	anterior pharynx defective 1 homolog B (C. elegans)
PPP2R5C	protein phosphatase 2, regulatory subunit B (B56), gamma isoform
OPN4	opsin 4 (melanopsin)
SAG	S-antigen; retina and pineal gland (arrestin)
PYGB	phosphorylase, glycogen; brain
TRO	trophinin
MBIP	MAP3K12 binding inhibitory protein 1
RGS3	regulator of G-protein signalling 3
AP3B2	adaptor-related protein complex 3, beta 2 subunit
UCP3	uncoupling protein 3 (mitochondrial, proton carrier)
BPGM	2,3-bisphosphoglycerate mutase
CDCA5	cell division cycle associated 5
CDK4	cyclin-dependent kinase 4
GPAA1	glycosylphosphatidylinositol anchor attachment protein 1 homolog (yeast)
PIGT	phosphatidylinositol glycan anchor biosynthesis, class T
B4GALT1	UDP-Gal:betaGlcNAc beta 1,4- galactosyltransferase, polypeptide 1
TOP1	topoisomerase (DNA) I
HTATSF1	HIV-1 Tat specific factor 1
PRPS1	phosphoribosyl pyrophosphate synthetase 1
NUDT3	nudix (nucleoside diphosphate linked moiety X)-type motif 3
ERH	enhancer of rudimentary homolog (Drosophila)
RB1	retinoblastoma 1 (including osteosarcoma)
CD4	CD4 molecule
GBF1	golgi-specific brefeldin A resistance factor 1
PVRL1	poliovirus receptor-related 1 (herpesvirus entry mediator C; nectin)
GNAI2	guanine nucleotide binding protein (G protein), alpha inhibiting activity polypeptide 2
STC2	stanniocalcin 2
CYFIP1	cytoplasmic FMR1 interacting protein 1
NRXN1	neurexin 1
RTN1	reticulon 1
TRIM28	tripartite motif-containing 28
PPFIA1	protein tyrosine phosphatase, receptor type, f polypeptide (PTPRF), interacting protein (liprin), alpha 1
PPFIA2	protein tyrosine phosphatase, receptor type, f polypeptide (PTPRF), interacting protein (liprin), alpha 2
RIOK3	RIO kinase 3 (yeast)
MLF1	myeloid leukemia factor 1
AIF1	allograft inflammatory factor 1
[truncated: 788 more rows]
